# Supplementary material for: Unique high Arctic methane metabolizing community revealed through in situ 13CH4-DNA-SIP enrichment in concert with genome binning
Source: PubMed Central journal article supplement (PMC8782848; doi:10.1038/s41598-021-04486-z), 2022-01-21
Supplement: 41598_2021_4486_MOESM1_ESM.pdf [file 41598_2021_4486_MOESM1_ESM.pdf]

HMMER3/f [3.1b2 | February 2015]

NAME pmoB\_IA\_loose Protein

LENG 415

ALPH amino

RF no

MM no

CONS yes

CS no

MAP yes

DATE Tue Jan 2 10:15:21 2018

NSEQ 36

EFFN 0.988770

CKSUM 2327598343

STATS LOCAL MSV -11.5451 0.69904

STATS LOCAL VITERBI -12.2042 0.69904

STATS LOCAL FORWARD -5.9414 0.69904

HMM

|       | A       | C       | D       | E       | F       | G       | H       | I       | K       | L       | M       | N       | P       | Q       | R       | S       | T       | V       | W       | Y       |
|-------|---------|---------|---------|---------|---------|---------|---------|---------|---------|---------|---------|---------|---------|---------|---------|---------|---------|---------|---------|---------|
| COMPO | m->m    | m->i    | m->d    | i->m    | i->i    | d->m    | d->d    |         |         |         |         |         |         |         |         |         |         |         |         |         |
|       | 2.53791 | 4.58482 | 3.03978 | 2.74189 | 3.20351 | 2.80189 | 3.82550 | 2.73007 | 2.75598 | 2.45744 | 3.54826 | 3.11791 | 3.24571 | 3.13152 | 2.98379 | 2.72986 | 2.78886 | 2.51096 | 4.13037 | 3.48257 |
|       | 2.68618 | 4.42198 | 2.77545 | 2.73145 | 3.46356 | 2.40538 | 3.72520 | 3.29351 | 2.67713 | 2.69362 | 4.24506 | 2.90335 | 2.73746 | 3.18161 | 2.89794 | 2.37905 | 2.77468 | 2.98508 | 4.58441 | 3.61529 |
|       | 0.48378 | 1.72992 | 1.57865 | 1.85227 | 0.17065 | 0.00000 | *       |         |         |         |         |         |         |         |         |         |         |         |         |         |
| 1     | 2.45411 | 4.14442 | 3.78559 | 3.21114 | 2.99139 | 3.64704 | 3.92100 | 2.32942 | 2.96253 | 2.19677 | 2.28347 | 3.51819 | 4.01395 | 3.38271 | 3.37476 | 2.92002 | 2.82161 | 2.33017 | 4.72786 | 3.18206 |
|       | 2.68618 | 4.42225 | 2.77519 | 2.73123 | 3.46354 | 2.40513 | 3.72494 | 3.29354 | 2.67741 | 2.69355 | 4.24690 | 2.90347 | 2.73739 | 3.18146 | 2.89801 | 2.37887 | 2.77519 | 2.98518 | 4.58477 | 3.61503 |
|       | 0.02867 | 3.96202 | 4.68437 | 0.61958 | 0.77255 | 0.70721 | 0.67928 |         |         |         |         |         |         |         |         |         |         |         |         |         |
| 2     | 2.67667 | 5.00053 | 2.71787 | 2.11850 | 4.33560 | 2.99817 | 3.61413 | 3.77225 | 1.80210 | 3.31092 | 4.11420 | 2.86131 | 3.34195 | 2.74978 | 2.75725 | 2.52539 | 2.91932 | 3.39980 | 5.48653 | 4.13080 |
|       | 2.68618 | 4.42225 | 2.77519 | 2.73123 | 3.46354 | 2.40513 | 3.72494 | 3.29354 | 2.67741 | 2.69355 | 4.24690 | 2.90347 | 2.73739 | 3.18146 | 2.89801 | 2.37887 | 2.77519 | 2.98518 | 4.58477 | 3.61503 |
|       | 0.02867 | 3.96202 | 4.68437 | 0.61958 | 0.77255 | 0.70721 | 0.67928 |         |         |         |         |         |         |         |         |         |         |         |         |         |
| 3     | 2.55443 | 4.43205 | 3.21842 | 2.66221 | 3.59787 | 3.46492 | 3.29239 | 2.76585 | 2.60964 | 2.34294 | 3.45265 | 2.77253 | 3.85523 | 2.95436 | 3.00292 | 2.50829 | 2.56267 | 2.72277 | 4.99179 | 3.72431 |
|       | 2.68618 | 4.42225 | 2.77519 | 2.73123 | 3.46354 | 2.40513 | 3.72494 | 3.29354 | 2.67741 | 2.69355 | 4.24690 | 2.90347 | 2.73739 | 3.18146 | 2.89801 | 2.37887 | 2.77519 | 2.98518 | 4.58477 | 3.61503 |
|       | 0.02867 | 3.96202 | 4.68437 | 0.61958 | 0.77255 | 0.65692 | 0.73074 |         |         |         |         |         |         |         |         |         |         |         |         |         |
| 4     | 2.43485 | 4.19341 | 3.60597 | 3.03886 | 3.33883 | 3.17941 | 3.86997 | 2.16899 | 2.96851 | 2.20505 | 3.11241 | 3.16555 | 3.96188 | 3.25971 | 3.27899 | 2.84155 | 2.63254 | 2.29286 | 4.81940 | 3.60008 |
|       | 2.68618 | 4.42225 | 2.77519 | 2.73123 | 3.46354 | 2.40513 | 3.72494 | 3.29354 | 2.67741 | 2.69355 | 4.24690 | 2.90347 | 2.73739 | 3.18146 | 2.89801 | 2.37887 | 2.77519 | 2.98518 | 4.58477 | 3.61503 |
|       | 0.02777 | 3.99330 | 4.71565 | 0.61958 | 0.77255 | 0.49201 | 0.94519 |         |         |         |         |         |         |         |         |         |         |         |         |         |
| 5     | 2.55320 | 4.82278 | 3.05981 | 2.41961 | 4.07863 | 3.46861 | 3.64347 | 3.47728 | 1.78230 | 3.07676 | 2.85234 | 2.85399 | 3.86025 | 2.79864 | 2.67364 | 2.70295 | 2.81323 | 3.16410 | 5.30850 | 4.00254 |
|       | 2.68618 | 4.42225 | 2.77519 | 2.73123 | 3.46354 | 2.40513 | 3.72494 | 3.29354 | 2.67741 | 2.69355 | 4.24690 | 2.90347 | 2.73739 | 3.18146 | 2.89801 | 2.37887 | 2.77519 | 2.98518 | 4.58477 | 3.61503 |
|       | 0.02466 | 4.11067 | 4.83302 | 0.61958 | 0.77255 | 0.47746 | 0.96853 |         |         |         |         |         |         |         |         |         |         |         |         |         |
| 6     | 2.53268 | 4.97748 | 2.37589 | 2.27427 | 4.26815 | 3.30076 | 3.60013 | 3.28164 | 2.12749 | 3.25799 | 3.51721 | 2.83150 | 3.79961 | 2.71892 | 2.54259 | 2.60554 | 2.84454 | 3.33854 | 5.44304 | 4.07018 |
|       | 2.68618 | 4.42225 | 2.77519 | 2.73123 | 3.46354 | 2.40513 | 3.72494 | 3.29354 | 2.67741 | 2.69355 | 4.24690 | 2.90347 | 2.73739 | 3.18146 | 2.89801 | 2.37887 | 2.77519 | 2.98518 | 4.58477 | 3.61503 |
|       | 0.02344 | 4.16084 | 4.88319 | 0.61958 | 0.77255 | 0.51359 | 0.91216 |         |         |         |         |         |         |         |         |         |         |         |         |         |
| 7     | 2.79049 | 5.09970 | 3.11707 | 2.52538 | 4.45284 | 3.52982 | 3.62050 | 3.86578 | 1.64437 | 3.07128 | 4.16204 | 2.79029 | 3.90913 | 2.52954 | 2.07287 | 2.54992 | 2.99853 | 3.50062 | 5.48599 | 4.18643 |
|       | 2.68618 | 4.42225 | 2.77519 | 2.73123 | 3.46354 | 2.40513 | 3.72494 | 3.29354 | 2.67741 | 2.69355 | 4.24690 | 2.90347 | 2.73739 | 3.18146 | 2.89801 | 2.37887 | 2.77519 | 2.98518 | 4.58477 | 3.61503 |
|       | 0.02344 | 4.16084 | 4.88319 | 0.61958 | 0.77255 | 0.51359 | 0.91216 |         |         |         |         |         |         |         |         |         |         |         |         |         |
| 8     | 2.52601 | 4.17962 | 3.73411 | 3.16110 | 3.21244 | 3.36963 | 3.91869 | 2.11916 | 3.08261 | 2.09075 | 3.29114 | 3.26788 | 4.01188 | 3.09895 | 3.36356 | 2.90251 | 2.59809 | 2.15702 | 4.78813 | 3.57752 |
|       | 2.68618 | 4.42225 | 2.77519 | 2.73123 | 3.46354 | 2.40513 | 3.72494 | 3.29354 | 2.67741 | 2.69355 | 4.24690 | 2.90347 | 2.73739 | 3.18146 | 2.89801 | 2.37887 | 2.77519 | 2.98518 | 4.58477 | 3.61503 |
|       | 0.02344 | 4.16084 | 4.88319 | 0.61958 | 0.77255 | 0.51359 | 0.91216 |         |         |         |         |         |         |         |         |         |         |         |         |         |
| 9     | 2.20008 | 4.41581 | 3.32725 | 2.76481 | 3.19364 | 2.83598 | 3.77335 | 2.93915 | 2.55252 | 2.53699 | 3.51533 | 3.20815 | 3.91574 | 2.86716 | 3.11626 | 2.76642 | 2.76791 | 2.39738 | 4.98492 | 3.47608 |
|       | 2.68618 | 4.42225 | 2.77519 | 2.73123 | 3.46354 | 2.40513 | 3.72494 | 3.29354 | 2.67741 | 2.69355 | 4.24690 | 2.90347 | 2.73739 | 3.18146 | 2.89801 | 2.37887 | 2.77519 | 2.98518 | 4.58477 | 3.61503 |
|       | 0.02344 | 4.16084 | 4.88319 | 0.61958 | 0.77255 | 0.51359 | 0.91216 |         |         |         |         |         |         |         |         |         |         |         |         |         |
| 10    | 2.81269 | 5.01192 | 3.20862 | 2.60861 | 3.76993 | 3.56012 | 3.64942 | 3.73585 | 1.44457 | 3.27012 | 4.09869 | 3.08513 | 3.94200 | 2.78813 | 2.04016 | 2.68259 | 3.02187 | 3.40465 | 5.41530 | 4.13401 |
|       | 2.68618 | 4.42225 | 2.77519 | 2.73123 | 3.46354 | 2.40513 | 3.72494 | 3.29354 | 2.67741 | 2.69355 | 4.24690 | 2.90347 | 2.73739 | 3.18146 | 2.89801 | 2.37887 | 2.77519 | 2.98518 | 4.58477 | 3.61503 |
|       | 0.02344 | 4.16084 | 4.88319 | 0.61958 | 0.77255 | 0.51359 | 0.91216 |         |         |         |         |         |         |         |         |         |         |         |         |         |
| 11    | 2.44657 | 4.12673 | 4.05094 | 3.46687 | 3.17393 | 3.73867 | 4.03536 | 2.24657 | 3.34588 | 1.59062 | 3.01120 | 3.69835 | 3.45338 | 3.57660 | 3.54158 | 3.02454 | 2.87305 | 2.32918 | 3.63697 | 3.53455 |
|       | 2.68618 | 4.42225 | 2.77519 | 2.73123 | 3.46354 | 2.40513 | 3.72494 | 3.29354 | 2.67741 | 2.69355 | 4.24690 | 2.90347 | 2.73739 | 3.18146 | 2.89801 | 2.37887 | 2.77519 | 2.98518 | 4.58477 | 3.61503 |
|       | 0.02344 | 4.16084 | 4.88319 | 0.61958 | 0.77255 | 0.51359 | 0.91216 |         |         |         |         |         |         |         |         |         |         |         |         |         |
| 12    | 2.23911 | 4.38303 | 3.37056 | 2.81537 | 3.57093 | 3.31298 | 3.80516 | 2.94150 | 2.77326 | 2.41841 | 3.52214 | 3.06400 | 3.91529 | 3.09340 | 3.14967 | 2.22053 | 2.55610 | 2.69668 | 3.38399 | 3.74141 |
|       | 2.68618 | 4.42225 | 2.77519 | 2.73123 | 3.46354 | 2.40513 | 3.72494 | 3.29354 | 2.67741 | 2.69355 | 4.24690 | 2.90347 | 2.73739 | 3.18146 | 2.89801 | 2.37887 | 2.77519 | 2.98518 | 4.58477 | 3.61503 |
|       | 0.02344 | 4.16084 | 4.88319 | 0.61958 | 0.77255 | 0.51359 | 0.91216 |         |         |         |         |         |         |         |         |         |         |         |         |         |
| 13    | 2.23328 | 4.18167 | 3.72684 | 3.15405 | 2.60124 | 3.29070 | 3.91290 | 2.63321 | 2.87444 | 2.01062 | 2.96228 | 3.48039 | 4.00725 | 3.34810 | 3.35508 | 2.89697 | 2.70679 | 2.42918 | 4.78444 | 3.57326 |
|       | 2.68618 | 4.42225 | 2.77519 | 2.73123 | 3.46354 | 2.40513 | 3.72494 | 3.29354 | 2.67741 | 2.69355 | 4.24690 | 2.90347 | 2.73739 | 3.18146 | 2.89801 | 2.37887 | 2.77519 | 2.98518 | 4.58477 | 3.61503 |
|       | 0.02344 | 4.16084 | 4.88319 | 0.61958 | 0.77255 | 0.51359 | 0.91216 |         |         |         |         |         |         |         |         |         |         |         |         |         |
| 14    | 2.52545 | 4.11740 | 3.96516 | 3.38585 | 3.01000 | 3.33958 | 4.00659 | 2.31031 | 3.28372 | 1.94756 | 3.13470 | 3.63916 | 4.07192 | 3.52459 | 3.50359 | 2.61617 | 2.84602 | 1.87306 | 4.74805 | 3.54965 |
|       | 2.68618 | 4.42225 | 2.77519 | 2.73123 | 3.46354 | 2.40513 | 3.72494 | 3.29354 | 2.67741 | 2.69355 | 4.24690 | 2.90347 | 2.73739 | 3.18146 | 2.89801 | 2.37887 | 2.77519 | 2.98518 | 4.58477 | 3.61503 |
|       | 0.02344 | 4.16084 | 4.88319 | 0.61958 | 0.77255 | 0.51359 | 0.91216 |         |         |         |         |         |         |         |         |         |         |         |         |         |
| 15    | 1.95133 | 4.32481 | 3.48352 | 2.94141 | 3.59630 | 2.54932 | 3.89599 | 2.74994 | 2.89417 | 2.25025 | 3.54897 | 3.31760 | 3.92327 | 3.20549 | 3.25002 | 2.54849 | 2.82587 | 2.52386 | 5.03351 | 3.79644 |
|       | 2.68618 | 4.42225 | 2.77519 | 2.73123 | 3.46354 | 2.40513 | 3.72494 | 3.29354 | 2.67741 | 2.69355 | 4.24690 | 2.90347 | 2.73739 | 3.18146 | 2.89801 | 2.37887 | 2.77519 | 2.98518 | 4.58477 | 3.61503 |
|       | 0.03649 | 4.16084 | 3.90005 | 0.61958 | 0.77255 | 0.51359 | 0.91216 |         |         |         |         |         |         |         |         |         |         |         |         |         |

|    |         |         |         |         |         |         |         |         |         |         |         |         |         |         |         |         |         |         |         |         |    |   |   |   |   |
|----|---------|---------|---------|---------|---------|---------|---------|---------|---------|---------|---------|---------|---------|---------|---------|---------|---------|---------|---------|---------|----|---|---|---|---|
|    | 2.68618 | 4.42225 | 2.77519 | 2.73123 | 3.46354 | 2.40513 | 3.72494 | 3.29354 | 2.67741 | 2.69355 | 4.24690 | 2.90347 | 2.73739 | 3.18146 | 2.89801 | 2.37887 | 2.77519 | 2.98518 | 4.58477 | 3.61503 |    |   |   |   |   |
|    | 0.02374 | 4.14809 | 4.87044 | 0.61958 | 0.77255 | 0.50371 | 0.92706 |         |         |         |         |         |         |         |         |         |         |         |         |         |    |   |   |   |   |
| 17 | 2.11198 | 4.26621 | 3.94499 | 3.39724 | 3.40163 | 3.72906 | 4.15106 | 2.30500 | 3.29327 | 1.52568 | 3.34364 | 3.68517 | 4.14785 | 3.57806 | 3.55613 | 2.86130 | 2.96057 | 2.17606 | 4.98796 | 3.78388 | 35 | l | - | - | - |
|    | 2.68618 | 4.42225 | 2.77519 | 2.73123 | 3.46354 | 2.40513 | 3.72494 | 3.29354 | 2.67741 | 2.69355 | 4.24690 | 2.90347 | 2.73739 | 3.18146 | 2.89801 | 2.37887 | 2.77519 | 2.98518 | 4.58477 | 3.61503 |    |   |   |   |   |
|    | 0.02344 | 4.16084 | 4.88319 | 0.61958 | 0.71216 | 0.51359 | 0.92121 |         |         |         |         |         |         |         |         |         |         |         |         |         |    |   |   |   |   |
| 18 | 2.12861 | 3.39037 | 3.97900 | 3.39573 | 3.07904 | 3.45163 | 3.97826 | 2.45458 | 3.28685 | 1.98427 | 3.10671 | 3.63094 | 4.04777 | 3.51887 | 3.49097 | 2.79538 | 2.81854 | 2.11296 | 4.69715 | 3.26168 | 36 | l | - | - | - |
|    | 2.68618 | 4.42225 | 2.77519 | 2.73123 | 3.46354 | 2.40513 | 3.72494 | 3.29354 | 2.67741 | 2.69355 | 4.24690 | 2.90347 | 2.73739 | 3.18146 | 2.89801 | 2.37887 | 2.77519 | 2.98518 | 4.58477 | 3.61503 |    |   |   |   |   |
|    | 0.02344 | 4.16084 | 4.88319 | 0.61958 | 0.77255 | 0.46875 | 0.98292 |         |         |         |         |         |         |         |         |         |         |         |         |         |    |   |   |   |   |
| 19 | 2.05940 | 4.36998 | 3.44051 | 2.91069 | 3.76334 | 2.20691 | 3.92052 | 2.84512 | 2.87332 | 2.72019 | 3.69557 | 3.28383 | 3.88995 | 3.19158 | 3.24769 | 2.64621 | 2.20486 | 2.65335 | 5.17118 | 3.92505 | 37 | a | - | - | - |
|    | 2.68618 | 4.42225 | 2.77519 | 2.73123 | 3.46354 | 2.40513 | 3.72494 | 3.29354 | 2.67741 | 2.69355 | 4.24690 | 2.90347 | 2.73739 | 3.18146 | 2.89801 | 2.37887 | 2.77519 | 2.98518 | 4.58477 | 3.61503 |    |   |   |   |   |
|    | 0.02290 | 4.18373 | 4.90608 | 0.61958 | 0.77255 | 0.48576 | 0.95510 |         |         |         |         |         |         |         |         |         |         |         |         |         |    |   |   |   |   |
| 20 | 2.55925 | 4.14545 | 4.01485 | 3.43619 | 3.02031 | 3.75201 | 4.05854 | 2.33474 | 3.33375 | 1.99705 | 3.00264 | 3.22107 | 4.11810 | 3.57484 | 3.55298 | 3.03563 | 2.70486 | 1.68401 | 4.79262 | 3.59495 | 38 | v | - | - | - |
|    | 2.68618 | 4.42225 | 2.77519 | 2.73123 | 3.46354 | 2.40513 | 3.72494 | 3.29354 | 2.67741 | 2.69355 | 4.24690 | 2.90347 | 2.73739 | 3.18146 | 2.89801 | 2.37887 | 2.77519 | 2.98518 | 4.58477 | 3.61503 |    |   |   |   |   |
|    | 0.02290 | 4.18373 | 4.90608 | 0.61958 | 0.77255 | 0.48576 | 0.95510 |         |         |         |         |         |         |         |         |         |         |         |         |         |    |   |   |   |   |
| 21 | 1.96761 | 4.24541 | 4.00880 | 3.44161 | 3.39696 | 3.82976 | 4.16962 | 1.93874 | 3.35648 | 2.15664 | 3.14451 | 3.73790 | 4.20108 | 3.62099 | 3.61674 | 3.11767 | 2.48806 | 1.98235 | 4.97143 | 3.76790 | 39 | i | - | - | - |
|    | 2.68618 | 4.42225 | 2.77519 | 2.73123 | 3.46354 | 2.40513 | 3.72494 | 3.29354 | 2.67741 | 2.69355 | 4.24690 | 2.90347 | 2.73739 | 3.18146 | 2.89801 | 2.37887 | 2.77519 | 2.98518 | 4.58477 | 3.61503 |    |   |   |   |   |
|    | 0.02290 | 4.18373 | 4.90608 | 0.61958 | 0.77255 | 0.48576 | 0.95510 |         |         |         |         |         |         |         |         |         |         |         |         |         |    |   |   |   |   |
| 22 | 1.79596 | 4.24380 | 3.77676 | 3.21023 | 3.38292 | 3.67789 | 4.00422 | 2.43571 | 3.13230 | 2.06727 | 2.95583 | 3.54197 | 4.06809 | 3.41437 | 3.42439 | 2.77508 | 2.84285 | 2.25673 | 4.90075 | 3.68956 | 40 | a | - | - | - |
|    | 2.68618 | 4.42225 | 2.77519 | 2.73123 | 3.46354 | 2.40513 | 3.72494 | 3.29354 | 2.67741 | 2.69355 | 4.24690 | 2.90347 | 2.73739 | 3.18146 | 2.89801 | 2.37887 | 2.77519 | 2.98518 | 4.58477 | 3.61503 |    |   |   |   |   |
|    | 0.07307 | 4.18373 | 2.89630 | 0.61958 | 0.77255 | 0.48576 | 0.95510 |         |         |         |         |         |         |         |         |         |         |         |         |         |    |   |   |   |   |
| 23 | 1.90326 | 4.33615 | 3.41761 | 2.94463 | 4.01993 | 2.97246 | 4.00101 | 3.39104 | 2.92619 | 2.83538 | 3.93177 | 3.26224 | 3.80655 | 3.24466 | 3.29968 | 1.86576 | 1.97798 | 3.01008 | 5.38190 | 4.13549 | 41 | s | - | - | - |
|    | 2.68618 | 4.42225 | 2.77519 | 2.73123 | 3.46354 | 2.40513 | 3.72494 | 3.29354 | 2.67741 | 2.69355 | 4.24690 | 2.90347 | 2.73739 | 3.18146 | 2.89801 | 2.37887 | 2.77519 | 2.98518 | 4.58477 | 3.61503 |    |   |   |   |   |
|    | 0.02407 | 4.13473 | 4.85707 | 0.61958 | 0.77255 | 0.54367 | 0.86896 |         |         |         |         |         |         |         |         |         |         |         |         |         |    |   |   |   |   |
| 24 | 2.48924 | 3.71484 | 4.16068 | 3.56875 | 3.12531 | 3.70315 | 4.01622 | 2.13859 | 3.42941 | 2.09109 | 2.49708 | 3.72964 | 3.74059 | 3.63088 | 3.57186 | 2.81394 | 2.81316 | 2.00077 | 4.06510 | 3.45866 | 42 | v | - | - | - |
|    | 2.68618 | 4.42225 | 2.77519 | 2.73123 | 3.46354 | 2.40513 | 3.72494 | 3.29354 | 2.67741 | 2.69355 | 4.24690 | 2.90347 | 2.73739 | 3.18146 | 2.89801 | 2.37887 | 2.77519 | 2.98518 | 4.58477 | 3.61503 |    |   |   |   |   |
|    | 0.02407 | 4.13473 | 4.85707 | 0.61958 | 0.77255 | 0.45118 | 1.01301 |         |         |         |         |         |         |         |         |         |         |         |         |         |    |   |   |   |   |
| 25 | 2.38315 | 4.11866 | 3.89976 | 3.31996 | 2.26692 | 3.17130 | 3.95806 | 2.47106 | 3.22255 | 2.13879 | 3.13705 | 3.33167 | 4.04126 | 3.46775 | 3.45325 | 2.94584 | 2.82729 | 2.22594 | 4.71841 | 3.21707 | 43 | l | - | - | - |
|    | 2.68618 | 4.42225 | 2.77519 | 2.73123 | 3.46354 | 2.40513 | 3.72494 | 3.29354 | 2.67741 | 2.69355 | 4.24690 | 2.90347 | 2.73739 | 3.18146 | 2.89801 | 2.37887 | 2.77519 | 2.98518 | 4.58477 | 3.61503 |    |   |   |   |   |
|    | 0.02290 | 4.18373 | 4.90608 | 0.61958 | 0.77255 | 0.48576 | 0.95510 |         |         |         |         |         |         |         |         |         |         |         |         |         |    |   |   |   |   |
| 26 | 2.05921 | 4.42108 | 3.33345 | 2.79833 | 3.63396 | 3.31387 | 3.81630 | 3.02069 | 2.76771 | 2.56508 | 3.59186 | 3.22416 | 3.58786 | 3.09130 | 3.15164 | 2.28368 | 2.83734 | 2.76374 | 5.04507 | 2.55934 | 44 | a | - | - | - |
|    | 2.68618 | 4.42225 | 2.77519 | 2.73123 | 3.46354 | 2.40513 | 3.72494 | 3.29354 | 2.67741 | 2.69355 | 4.24690 | 2.90347 | 2.73739 | 3.18146 | 2.89801 | 2.37887 | 2.77519 | 2.98518 | 4.58477 | 3.61503 |    |   |   |   |   |
|    | 0.02290 | 4.18373 | 4.90608 | 0.61958 | 0.77255 | 0.48576 | 0.95510 |         |         |         |         |         |         |         |         |         |         |         |         |         |    |   |   |   |   |
| 27 | 2.18103 | 4.27627 | 3.57888 | 3.01772 | 3.45827 | 3.56400 | 3.90059 | 2.37190 | 2.96241 | 2.39569 | 3.42609 | 3.38695 | 3.60579 | 3.25781 | 3.29511 | 2.37675 | 2.48870 | 2.27149 | 4.92033 | 3.69443 | 45 | a | - | - | - |
|    | 2.68618 | 4.42225 | 2.77519 | 2.73123 | 3.46354 | 2.40513 | 3.72494 | 3.29354 | 2.67741 | 2.69355 | 4.24690 | 2.90347 | 2.73739 | 3.18146 | 2.89801 | 2.37887 | 2.77519 | 2.98518 | 4.58477 | 3.61503 |    |   |   |   |   |
|    | 0.02290 | 4.18373 | 4.90608 | 0.61958 | 0.77255 | 0.48576 | 0.95510 |         |         |         |         |         |         |         |         |         |         |         |         |         |    |   |   |   |   |
| 28 | 2.12626 | 4.43537 | 3.30881 | 2.84898 | 4.14065 | 2.49875 | 3.96921 | 3.54443 | 2.85769 | 2.98361 | 4.02812 | 3.21100 | 1.91973 | 3.18099 | 3.25743 | 2.32737 | 2.58337 | 3.13743 | 5.46569 | 4.19818 | 46 | p | - | - | - |
|    | 2.68623 | 4.42191 | 2.77524 | 2.73128 | 3.46333 | 2.40517 | 3.72499 | 3.29359 | 2.67745 | 2.69343 | 4.24694 | 2.90351 | 2.73744 | 3.18136 | 2.89805 | 2.37882 | 2.77524 | 2.98513 | 4.58482 | 3.61491 |    |   |   |   |   |
|    | 0.19574 | 1.76976 | 4.90608 | 0.55700 | 0.85079 | 0.48576 | 0.95510 |         |         |         |         |         |         |         |         |         |         |         |         |         |    |   |   |   |   |
| 29 | 2.22601 | 4.54221 | 3.19348 | 2.67309 | 3.85052 | 3.41201 | 3.78269 | 3.24019 | 2.66217 | 2.90517 | 3.75700 | 3.01570 | 2.67626 | 2.99826 | 3.07910 | 2.57011 | 2.10112 | 2.94437 | 5.20565 | 3.30773 | 49 | t | - | - | - |
|    | 2.68618 | 4.42225 | 2.77519 | 2.73123 | 3.46354 | 2.40513 | 3.72494 | 3.29354 | 2.67741 | 2.69355 | 4.24690 | 2.90347 | 2.73739 | 3.18146 | 2.89801 | 2.37887 | 2.77519 | 2.98518 | 4.58477 | 3.61503 |    |   |   |   |   |
|    | 0.02290 | 4.18373 | 4.90608 | 0.61958 | 0.77255 | 0.48576 | 0.95510 |         |         |         |         |         |         |         |         |         |         |         |         |         |    |   |   |   |   |
| 30 | 1.19029 | 4.23195 | 3.82972 | 3.42584 | 3.97414 | 3.22739 | 4.32326 | 2.98901 | 3.37155 | 2.97433 | 3.91739 | 3.55913 | 3.91061 | 3.66480 | 3.64846 | 2.45673 | 2.84978 | 1.98522 | 5.44990 | 4.24107 | 50 | a | - | - | - |
|    | 2.68618 | 4.42225 | 2.77519 | 2.73123 | 3.46354 | 2.40513 | 3.72494 | 3.29354 | 2.67741 | 2.69355 | 4.24690 | 2.90347 | 2.73739 | 3.18146 | 2.89801 | 2.37887 | 2.77519 | 2.98518 | 4.58477 | 3.61503 |    |   |   |   |   |
|    | 0.02290 | 4.18373 | 4.90608 | 0.61958 | 0.77255 | 0.48576 | 0.95510 |         |         |         |         |         |         |         |         |         |         |         |         |         |    |   |   |   |   |
| 31 | 2.46240 | 4.80318 | 2.79889 | 2.41420 | 4.03863 | 3.44142 | 3.50854 | 3.45484 | 2.44848 | 3.06084 | 3.52154 | 2.97506 | 3.83331 | 2.45262 | 2.90827 | 2.03014 | 2.84430 | 3.13453 | 4.06741 | 3.97409 | 51 | s | - | - | - |
|    | 2.68618 | 4.42225 | 2.77519 | 2.73123 | 3.46354 | 2.40513 | 3.72494 | 3.29354 | 2.67741 | 2.69355 | 4.24690 | 2.90347 | 2.73739 | 3.18146 | 2.89801 | 2.37887 | 2.77519 | 2.98518 | 4.58477 | 3.61503 |    |   |   |   |   |
|    | 0.02290 | 4.18373 | 4.90608 | 0.61958 | 0.77255 | 0.48576 | 0.95510 |         |         |         |         |         |         |         |         |         |         |         |         |         |    |   |   |   |   |
| 32 | 0.93746 | 4.26295 | 3.61442 | 3.38908 | 4.48471 | 2.02462 | 4.44923 | 3.85276 | 3.48183 | 3.59245 | 4.43502 | 3.48298 | 3.81644 | 3.74842 | 3.76227 | 2.52551 | 2.84640 | 3.29295 | 5.82705 | 4.64732 | 52 | a | - | - | - |
|    | 2.68618 | 4.42225 | 2.77519 | 2.73123 | 3.46354 | 2.40513 | 3.72494 | 3.29354 | 2.67741 | 2.69355 | 4.24690 | 2.90347 | 2.73739 | 3.18146 | 2.89801 | 2.37887 | 2.77519 | 2.98518 | 4.58477 | 3.61503 |    |   |   |   |   |
|    | 0.02290 | 4.18373 | 4.90608 | 0.61958 | 0.77255 | 0.48576 | 0.95510 |         |         |         |         |         |         |         |         |         |         |         |         |         |    |   |   |   |   |
| 33 | 2.76405 | 4.51717 | 3.54061 | 2.99343 | 3.34137 | 3.68540 | 1.75130 | 2.58471 | 2.81696 | 2.48021 | 2.91635 | 3.39601 | 4.07120 | 3.21824 | 3.13753 | 2.95919 | 2.99977 | 2.70752 | 4.87819 | 3.50999 | 53 | h | - | - | - |
|    | 2.68618 | 4.42225 | 2.77519 | 2.73123 | 3.46354 | 2.40513 | 3.72494 | 3.29354 | 2.67741 | 2.69355 | 4.24690 | 2.90347 | 2.73739 | 3.18146 | 2.89801 | 2.37887 | 2.77519 | 2.98518 | 4.58477 | 3.61503 |    |   |   |   |   |
|    | 0.02290 | 4.18373 | 4.90608 | 0.61958 | 0.77255 | 0.48576 | 0.95510 |         |         |         |         |         |         |         |         |         |         |         |         |         |    |   |   |   |   |



|    |         |         |         |         |         |         |         |         |         |         |         |         |         |         |         |         |         |         |         |         |     |   |   |   |   |
|----|---------|---------|---------|---------|---------|---------|---------|---------|---------|---------|---------|---------|---------|---------|---------|---------|---------|---------|---------|---------|-----|---|---|---|---|
| 61 | 2.83640 | 4.34742 | 4.23629 | 3.73749 | 3.58513 | 3.91424 | 4.49174 | 1.99842 | 3.62090 | 2.34904 | 3.48794 | 3.97729 | 3.38068 | 3.92142 | 3.86230 | 3.27393 | 3.13019 | 1.06320 | 5.27542 | 4.05697 | 84  | v | - | - | - |
|    | 2.68618 | 4.42225 | 2.77519 | 2.73123 | 3.46354 | 2.40513 | 3.72494 | 3.29354 | 2.67741 | 2.69355 | 4.24690 | 2.90347 | 2.73739 | 3.18146 | 2.89801 | 2.37887 | 2.77519 | 2.98518 | 4.58477 | 3.61503 |     |   |   |   |   |
|    | 0.02290 | 4.18373 | 4.90608 | 0.61958 | 0.77255 | 0.48576 | 0.95510 |         |         |         |         |         |         |         |         |         |         |         |         |         |     |   |   |   |   |
| 62 | 2.70424 | 4.81521 | 2.75475 | 2.62472 | 4.59277 | 1.94189 | 4.05343 | 4.13537 | 2.98121 | 3.72596 | 4.56883 | 1.28286 | 3.90955 | 3.25980 | 3.41313 | 2.76526 | 3.10459 | 3.64112 | 5.83193 | 4.49224 | 85  | n | - | - | - |
|    | 2.68618 | 4.42225 | 2.77519 | 2.73123 | 3.46354 | 2.40513 | 3.72494 | 3.29354 | 2.67741 | 2.69355 | 4.24690 | 2.90347 | 2.73739 | 3.18146 | 2.89801 | 2.37887 | 2.77519 | 2.98518 | 4.58477 | 3.61503 |     |   |   |   |   |
|    | 0.02290 | 4.18373 | 4.90608 | 0.61958 | 0.77255 | 0.48576 | 0.95510 |         |         |         |         |         |         |         |         |         |         |         |         |         |     |   |   |   |   |
| 63 | 3.07947 | 5.69793 | 1.45354 | 1.24604 | 4.98270 | 3.31329 | 3.87685 | 4.52026 | 2.91938 | 4.00205 | 4.85991 | 2.77035 | 3.94767 | 3.04450 | 3.53580 | 2.94763 | 3.37206 | 4.07791 | 6.14440 | 4.61890 | 86  | e | - | - | - |
|    | 2.68618 | 4.42225 | 2.77519 | 2.73123 | 3.46354 | 2.40513 | 3.72494 | 3.29354 | 2.67741 | 2.69355 | 4.24690 | 2.90347 | 2.73739 | 3.18146 | 2.89801 | 2.37887 | 2.77519 | 2.98518 | 4.58477 | 3.61503 |     |   |   |   |   |
|    | 0.02290 | 4.18373 | 4.90608 | 0.61958 | 0.77255 | 0.48576 | 0.95510 |         |         |         |         |         |         |         |         |         |         |         |         |         |     |   |   |   |   |
| 64 | 2.79268 | 5.21622 | 2.25127 | 1.57957 | 4.54019 | 3.35228 | 3.73201 | 4.00145 | 2.59511 | 3.53795 | 4.33937 | 2.84411 | 3.86609 | 2.87216 | 3.11245 | 2.66121 | 2.09417 | 3.60348 | 5.71928 | 4.29921 | 87  | e | - | - | - |
|    | 2.68618 | 4.42225 | 2.77519 | 2.73123 | 3.46354 | 2.40513 | 3.72494 | 3.29354 | 2.67741 | 2.69355 | 4.24690 | 2.90347 | 2.73739 | 3.18146 | 2.89801 | 2.37887 | 2.77519 | 2.98518 | 4.58477 | 3.61503 |     |   |   |   |   |
|    | 0.02290 | 4.18373 | 4.90608 | 0.61958 | 0.77255 | 0.48576 | 0.95510 |         |         |         |         |         |         |         |         |         |         |         |         |         |     |   |   |   |   |
| 65 | 2.83862 | 4.24865 | 4.43637 | 3.85139 | 2.62626 | 3.98735 | 4.25245 | 2.38881 | 3.71199 | 1.76171 | 1.95355 | 4.01275 | 4.31120 | 3.87580 | 3.83658 | 3.29108 | 3.06694 | 1.92851 | 4.76602 | 3.03980 | 88  | l | - | - | - |
|    | 2.68618 | 4.42225 | 2.77519 | 2.73123 | 3.46354 | 2.40513 | 3.72494 | 3.29354 | 2.67741 | 2.69355 | 4.24690 | 2.90347 | 2.73739 | 3.18146 | 2.89801 | 2.37887 | 2.77519 | 2.98518 | 4.58477 | 3.61503 |     |   |   |   |   |
|    | 0.02290 | 4.18373 | 4.90608 | 0.61958 | 0.77255 | 0.48576 | 0.95510 |         |         |         |         |         |         |         |         |         |         |         |         |         |     |   |   |   |   |
| 66 | 2.61412 | 4.73235 | 2.79893 | 2.22122 | 3.96412 | 3.44919 | 3.68136 | 3.13252 | 2.50937 | 2.99296 | 3.82494 | 3.01158 | 3.85038 | 2.85195 | 2.96221 | 2.34934 | 2.51013 | 5.26701 | 3.94936 | 3.61503 | 89  | e | - | - | - |
|    | 2.68618 | 4.42225 | 2.77519 | 2.73123 | 3.46354 | 2.40513 | 3.72494 | 3.29354 | 2.67741 | 2.69355 | 4.24690 | 2.90347 | 2.73739 | 3.18146 | 2.89801 | 2.37887 | 2.77519 | 2.98518 | 4.58477 | 3.61503 |     |   |   |   |   |
|    | 0.02290 | 4.18373 | 4.90608 | 0.61958 | 0.77255 | 0.48576 | 0.95510 |         |         |         |         |         |         |         |         |         |         |         |         |         |     |   |   |   |   |
| 67 | 3.00433 | 3.15952 | 4.82989 | 4.27595 | 3.47466 | 4.32016 | 4.76101 | 1.43067 | 4.14898 | 1.78766 | 3.34168 | 4.41483 | 4.62849 | 4.34243 | 4.27333 | 3.66375 | 3.24933 | 1.42628 | 5.25683 | 4.07725 | 90  | v | - | - | - |
|    | 2.68618 | 4.42225 | 2.77519 | 2.73123 | 3.46354 | 2.40513 | 3.72494 | 3.29354 | 2.67741 | 2.69355 | 4.24690 | 2.90347 | 2.73739 | 3.18146 | 2.89801 | 2.37887 | 2.77519 | 2.98518 | 4.58477 | 3.61503 |     |   |   |   |   |
|    | 0.02290 | 4.18373 | 4.90608 | 0.61958 | 0.77255 | 0.48576 | 0.95510 |         |         |         |         |         |         |         |         |         |         |         |         |         |     |   |   |   |   |
| 68 | 2.42769 | 4.39074 | 3.35448 | 2.99856 | 4.24112 | 3.16497 | 4.10927 | 3.61430 | 2.90677 | 3.31172 | 4.15765 | 3.29435 | 3.83344 | 3.34754 | 3.34694 | 1.59943 | 1.52276 | 3.17800 | 5.57681 | 4.32713 | 91  | t | - | - | - |
|    | 2.68618 | 4.42225 | 2.77519 | 2.73123 | 3.46354 | 2.40513 | 3.72494 | 3.29354 | 2.67741 | 2.69355 | 4.24690 | 2.90347 | 2.73739 | 3.18146 | 2.89801 | 2.37887 | 2.77519 | 2.98518 | 4.58477 | 3.61503 |     |   |   |   |   |
|    | 0.02290 | 4.18373 | 4.90608 | 0.61958 | 0.77255 | 0.48576 | 0.95510 |         |         |         |         |         |         |         |         |         |         |         |         |         |     |   |   |   |   |
| 69 | 3.09995 | 4.83262 | 3.83645 | 3.78085 | 4.89495 | 0.37791 | 4.87055 | 4.58175 | 4.00380 | 4.19229 | 5.17870 | 4.00221 | 4.23262 | 4.30392 | 4.19473 | 3.28255 | 3.60515 | 4.04968 | 5.89622 | 5.01130 | 92  | G | - | - | - |
|    | 2.68618 | 4.42225 | 2.77519 | 2.73123 | 3.46354 | 2.40513 | 3.72494 | 3.29354 | 2.67741 | 2.69355 | 4.24690 | 2.90347 | 2.73739 | 3.18146 | 2.89801 | 2.37887 | 2.77519 | 2.98518 | 4.58477 | 3.61503 |     |   |   |   |   |
|    | 0.02290 | 4.18373 | 4.90608 | 0.61958 | 0.77255 | 0.48576 | 0.95510 |         |         |         |         |         |         |         |         |         |         |         |         |         |     |   |   |   |   |
| 70 | 3.28850 | 5.23796 | 3.48347 | 3.06091 | 4.69708 | 3.73021 | 3.97489 | 4.14953 | 0.67848 | 3.65183 | 4.60744 | 3.46717 | 4.21751 | 3.15652 | 2.54565 | 3.31659 | 3.52376 | 3.84381 | 5.63101 | 4.49490 | 93  | K | - | - | - |
|    | 2.68618 | 4.42225 | 2.77519 | 2.73123 | 3.46354 | 2.40513 | 3.72494 | 3.29354 | 2.67741 | 2.69355 | 4.24690 | 2.90347 | 2.73739 | 3.18146 | 2.89801 | 2.37887 | 2.77519 | 2.98518 | 4.58477 | 3.61503 |     |   |   |   |   |
|    | 0.02290 | 4.18373 | 4.90608 | 0.61958 | 0.77255 | 0.48576 | 0.95510 |         |         |         |         |         |         |         |         |         |         |         |         |         |     |   |   |   |   |
| 71 | 3.12642 | 4.48042 | 4.73889 | 4.19023 | 1.63193 | 4.32978 | 4.52022 | 2.15486 | 4.05812 | 1.69903 | 3.13781 | 4.34816 | 4.61086 | 4.19702 | 4.17967 | 3.66323 | 3.36085 | 1.64758 | 4.89569 | 3.56530 | 94  | f | - | - | - |
|    | 2.68618 | 4.42225 | 2.77519 | 2.73123 | 3.46354 | 2.40513 | 3.72494 | 3.29354 | 2.67741 | 2.69355 | 4.24690 | 2.90347 | 2.73739 | 3.18146 | 2.89801 | 2.37887 | 2.77519 | 2.98518 | 4.58477 | 3.61503 |     |   |   |   |   |
|    | 0.02290 | 4.18373 | 4.90608 | 0.61958 | 0.77255 | 0.48576 | 0.95510 |         |         |         |         |         |         |         |         |         |         |         |         |         |     |   |   |   |   |
| 72 | 2.69882 | 4.50316 | 3.42935 | 2.86595 | 3.26058 | 3.61608 | 1.95675 | 2.98993 | 2.72009 | 2.54741 | 2.69916 | 3.28967 | 3.99641 | 3.10880 | 2.91925 | 2.86743 | 2.92845 | 2.77676 | 4.87955 | 3.52047 | 95  | h | - | - | - |
|    | 2.68618 | 4.42225 | 2.77519 | 2.73123 | 3.46354 | 2.40513 | 3.72494 | 3.29354 | 2.67741 | 2.69355 | 4.24690 | 2.90347 | 2.73739 | 3.18146 | 2.89801 | 2.37887 | 2.77519 | 2.98518 | 4.58477 | 3.61503 |     |   |   |   |   |
|    | 0.02290 | 4.18373 | 4.90608 | 0.61958 | 0.77255 | 0.48576 | 0.95510 |         |         |         |         |         |         |         |         |         |         |         |         |         |     |   |   |   |   |
| 73 | 3.05676 | 4.39191 | 4.73751 | 4.19901 | 3.58776 | 4.37544 | 4.84611 | 1.60479 | 4.09168 | 1.96395 | 3.42321 | 4.41364 | 4.68639 | 4.33577 | 4.28311 | 3.72255 | 2.84896 | 1.11229 | 5.41736 | 4.22581 | 96  | v | - | - | - |
|    | 2.68618 | 4.42225 | 2.77519 | 2.73123 | 3.46354 | 2.40513 | 3.72494 | 3.29354 | 2.67741 | 2.69355 | 4.24690 | 2.90347 | 2.73739 | 3.18146 | 2.89801 | 2.37887 | 2.77519 | 2.98518 | 4.58477 | 3.61503 |     |   |   |   |   |
|    | 0.02290 | 4.18373 | 4.90608 | 0.61958 | 0.77255 | 0.48576 | 0.95510 |         |         |         |         |         |         |         |         |         |         |         |         |         |     |   |   |   |   |
| 74 | 2.41926 | 4.31949 | 4.34078 | 3.76937 | 1.81840 | 3.99809 | 4.27045 | 2.40146 | 3.64474 | 1.75745 | 2.40792 | 3.98321 | 4.32953 | 3.83816 | 3.81425 | 3.30255 | 3.10977 | 2.34727 | 4.82732 | 3.59809 | 97  | l | - | - | - |
|    | 2.68618 | 4.42225 | 2.77519 | 2.73123 | 3.46354 | 2.40513 | 3.72494 | 3.29354 | 2.67741 | 2.69355 | 4.24690 | 2.90347 | 2.73739 | 3.18146 | 2.89801 | 2.37887 | 2.77519 | 2.98518 | 4.58477 | 3.61503 |     |   |   |   |   |
|    | 0.02290 | 4.18373 | 4.90608 | 0.61958 | 0.77255 | 0.48576 | 0.95510 |         |         |         |         |         |         |         |         |         |         |         |         |         |     |   |   |   |   |
| 75 | 2.39053 | 5.08334 | 2.64250 | 1.91620 | 4.40268 | 3.37715 | 3.65842 | 3.86308 | 2.42709 | 3.39413 | 4.17454 | 2.73376 | 2.82634 | 2.78358 | 2.95285 | 2.19308 | 2.93027 | 3.46896 | 5.57189 | 4.17715 | 98  | e | - | - | - |
|    | 2.68618 | 4.42225 | 2.77519 | 2.73123 | 3.46354 | 2.40513 | 3.72494 | 3.29354 | 2.67741 | 2.69355 | 4.24690 | 2.90347 | 2.73739 | 3.18146 | 2.89801 | 2.37887 | 2.77519 | 2.98518 | 4.58477 | 3.61503 |     |   |   |   |   |
|    | 0.02290 | 4.18373 | 4.90608 | 0.61958 | 0.77255 | 0.48576 | 0.95510 |         |         |         |         |         |         |         |         |         |         |         |         |         |     |   |   |   |   |
| 76 | 2.33643 | 4.89571 | 2.47909 | 2.26989 | 4.18086 | 2.58192 | 3.65254 | 3.17870 | 2.45039 | 3.19127 | 3.99148 | 2.93494 | 3.82428 | 2.79174 | 2.92593 | 2.54082 | 2.58383 | 3.25899 | 5.41212 | 4.05690 | 99  | e | - | - | - |
|    | 2.68618 | 4.42225 | 2.77519 | 2.73123 | 3.46354 | 2.40513 | 3.72494 | 3.29354 | 2.67741 | 2.69355 | 4.24690 | 2.90347 | 2.73739 | 3.18146 | 2.89801 | 2.37887 | 2.77519 | 2.98518 | 4.58477 | 3.61503 |     |   |   |   |   |
|    | 0.02290 | 4.18373 | 4.90608 | 0.61958 | 0.77255 | 0.48576 | 0.95510 |         |         |         |         |         |         |         |         |         |         |         |         |         |     |   |   |   |   |
| 77 | 3.90581 | 5.15933 | 4.60044 | 4.39164 | 3.05721 | 4.10803 | 4.33949 | 3.95678 | 4.11523 | 3.29253 | 4.57374 | 4.48179 | 4.65362 | 4.48590 | 4.18455 | 4.10625 | 4.22457 | 3.85500 | 0.43840 | 3.04495 | 100 | w | - | - | - |
|    | 2.68618 | 4.42225 | 2.77519 | 2.73123 | 3.46354 | 2.40513 | 3.72494 | 3.29354 | 2.67741 | 2.69355 | 4.24690 | 2.90347 | 2.73739 | 3.18146 | 2.89801 | 2.37887 | 2.77519 | 2.98518 | 4.58477 | 3.61503 |     |   |   |   |   |
|    | 0.02290 | 4.18373 | 4.90608 | 0.61958 | 0.77255 | 0.48576 | 0.95510 |         |         |         |         |         |         |         |         |         |         |         |         |         |     |   |   |   |   |
| 78 | 3.22031 | 4.91301 | 3.86274 | 3.75476 | 4.70463 | 3.58351 | 4.79631 | 4.34360 | 3.84144 | 3.93066 | 5.00116 | 4.02490 | 0.41006 | 4.22005 | 4.04145 | 3.39999 | 3.68818 | 3.950   |         |         |     |   |   |   |   |





|     |         |         |         |         |         |         |         |         |         |         |         |         |         |         |         |         |         |         |         |         |     |   |   |   |   |
|-----|---------|---------|---------|---------|---------|---------|---------|---------|---------|---------|---------|---------|---------|---------|---------|---------|---------|---------|---------|---------|-----|---|---|---|---|
| 128 | 2.94447 | 4.40219 | 4.30863 | 3.74111 | 3.22661 | 4.06893 | 4.36506 | 2.14063 | 3.58120 | 1.10190 | 2.82339 | 3.60658 | 4.39074 | 3.83770 | 3.78325 | 3.37576 | 3.17799 | 2.27434 | 4.99446 | 3.81480 | 156 | l | - | - | - |
|     | 2.68618 | 4.42225 | 2.77519 | 2.73123 | 3.46354 | 2.40513 | 3.72494 | 3.29354 | 2.67741 | 2.69355 | 4.24690 | 2.90347 | 2.73739 | 3.18146 | 2.89801 | 2.37887 | 2.77519 | 2.98518 | 4.58477 | 3.61503 |     |   |   |   |   |
|     | 0.02290 | 4.18373 | 4.90608 | 0.61958 | 0.77255 | 0.48576 | 0.95510 |         |         |         |         |         |         |         |         |         |         |         |         |         |     |   |   |   |   |
| 129 | 2.76784 | 5.02859 | 3.14048 | 2.54126 | 4.35037 | 3.53168 | 3.63440 | 3.75651 | 1.59291 | 3.28435 | 3.43960 | 3.03717 | 3.90929 | 2.38366 | 2.30399 | 2.77010 | 2.69051 | 3.41016 | 5.44193 | 4.14385 | 157 | k | - | - | - |
|     | 2.68618 | 4.42225 | 2.77519 | 2.73123 | 3.46354 | 2.40513 | 3.72494 | 3.29354 | 2.67741 | 2.69355 | 4.24690 | 2.90347 | 2.73739 | 3.18146 | 2.89801 | 2.37887 | 2.77519 | 2.98518 | 4.58477 | 3.61503 |     |   |   |   |   |
|     | 0.02290 | 4.18373 | 4.90608 | 0.61958 | 0.77255 | 0.48576 | 0.95510 |         |         |         |         |         |         |         |         |         |         |         |         |         |     |   |   |   |   |
| 130 | 1.16976 | 4.26884 | 3.58566 | 3.36168 | 4.50315 | 1.55202 | 4.43854 | 3.88296 | 3.46661 | 3.61172 | 4.44876 | 3.46801 | 3.81270 | 3.73106 | 3.75483 | 2.52160 | 2.84524 | 3.31201 | 5.83933 | 4.65617 | 158 | a | - | - | - |
|     | 2.68618 | 4.42225 | 2.77519 | 2.73123 | 3.46354 | 2.40513 | 3.72494 | 3.29354 | 2.67741 | 2.69355 | 4.24690 | 2.90347 | 2.73739 | 3.18146 | 2.89801 | 2.37887 | 2.77519 | 2.98518 | 4.58477 | 3.61503 |     |   |   |   |   |
|     | 0.02290 | 4.18373 | 4.90608 | 0.61958 | 0.77255 | 0.48576 | 0.95510 |         |         |         |         |         |         |         |         |         |         |         |         |         |     |   |   |   |   |
| 131 | 3.39326 | 5.18728 | 3.91904 | 3.37864 | 4.62317 | 3.80584 | 4.10075 | 4.19699 | 2.43055 | 3.65635 | 4.65808 | 3.70929 | 4.30210 | 3.31412 | 0.59204 | 3.46858 | 3.64356 | 3.90975 | 5.58474 | 4.49376 | 159 | r | - | - | - |
|     | 2.68618 | 4.42225 | 2.77519 | 2.73123 | 3.46354 | 2.40513 | 3.72494 | 3.29354 | 2.67741 | 2.69355 | 4.24690 | 2.90347 | 2.73739 | 3.18146 | 2.89801 | 2.37887 | 2.77519 | 2.98518 | 4.58477 | 3.61503 |     |   |   |   |   |
|     | 0.02290 | 4.18373 | 4.90608 | 0.61958 | 0.77255 | 0.48576 | 0.95510 |         |         |         |         |         |         |         |         |         |         |         |         |         |     |   |   |   |   |
| 132 | 2.68572 | 4.72840 | 3.19663 | 2.61840 | 3.92771 | 3.52630 | 3.69180 | 3.33182 | 2.40957 | 2.57425 | 3.81155 | 2.83380 | 3.90893 | 2.74154 | 1.85190 | 2.76095 | 2.90875 | 2.78678 | 5.21788 | 3.64362 | 160 | r | - | - | - |
|     | 2.68618 | 4.42225 | 2.77519 | 2.73123 | 3.46354 | 2.40513 | 3.72494 | 3.29354 | 2.67741 | 2.69355 | 4.24690 | 2.90347 | 2.73739 | 3.18146 | 2.89801 | 2.37887 | 2.77519 | 2.98518 | 4.58477 | 3.61503 |     |   |   |   |   |
|     | 0.02290 | 4.18373 | 4.90608 | 0.61958 | 0.77255 | 0.48576 | 0.95510 |         |         |         |         |         |         |         |         |         |         |         |         |         |     |   |   |   |   |
| 133 | 2.14040 | 4.48439 | 3.19155 | 2.82665 | 4.21332 | 3.07232 | 3.99483 | 3.60766 | 2.86758 | 3.26592 | 4.10438 | 3.19950 | 1.55212 | 3.01550 | 3.25076 | 2.61163 | 2.52671 | 3.19685 | 5.52945 | 4.26078 | 161 | p | - | - | - |
|     | 2.68618 | 4.42225 | 2.77519 | 2.73123 | 3.46354 | 2.40513 | 3.72494 | 3.29354 | 2.67741 | 2.69355 | 4.24690 | 2.90347 | 2.73739 | 3.18146 | 2.89801 | 2.37887 | 2.77519 | 2.98518 | 4.58477 | 3.61503 |     |   |   |   |   |
|     | 0.02290 | 4.18373 | 4.90608 | 0.61958 | 0.77255 | 0.48576 | 0.95510 |         |         |         |         |         |         |         |         |         |         |         |         |         |     |   |   |   |   |
| 134 | 3.09995 | 4.83262 | 3.83645 | 3.78085 | 4.89495 | 0.37791 | 4.87055 | 4.58175 | 4.00380 | 4.19229 | 5.17870 | 4.00221 | 4.23262 | 4.30392 | 4.19473 | 3.28255 | 3.60515 | 4.04968 | 5.89622 | 5.01130 | 162 | G | - | - | - |
|     | 2.68618 | 4.42225 | 2.77519 | 2.73123 | 3.46354 | 2.40513 | 3.72494 | 3.29354 | 2.67741 | 2.69355 | 4.24690 | 2.90347 | 2.73739 | 3.18146 | 2.89801 | 2.37887 | 2.77519 | 2.98518 | 4.58477 | 3.61503 |     |   |   |   |   |
|     | 0.02290 | 4.18373 | 4.90608 | 0.61958 | 0.77255 | 0.48576 | 0.95510 |         |         |         |         |         |         |         |         |         |         |         |         |         |     |   |   |   |   |
| 135 | 2.62806 | 4.99844 | 2.42163 | 2.30672 | 4.29153 | 3.41011 | 3.17275 | 3.33579 | 2.36373 | 3.27996 | 4.05585 | 2.78222 | 3.80834 | 2.72805 | 2.36341 | 2.61747 | 2.43931 | 3.36148 | 5.46195 | 4.08730 | 163 | e | - | - | - |
|     | 2.68618 | 4.42225 | 2.77519 | 2.73123 | 3.46354 | 2.40513 | 3.72494 | 3.29354 | 2.67741 | 2.69355 | 4.24690 | 2.90347 | 2.73739 | 3.18146 | 2.89801 | 2.37887 | 2.77519 | 2.98518 | 4.58477 | 3.61503 |     |   |   |   |   |
|     | 0.02290 | 4.18373 | 4.90608 | 0.61958 | 0.77255 | 0.48576 | 0.95510 |         |         |         |         |         |         |         |         |         |         |         |         |         |     |   |   |   |   |
| 136 | 3.83564 | 5.02079 | 4.83244 | 4.53413 | 1.86339 | 4.55351 | 3.52694 | 3.58097 | 4.34624 | 2.90213 | 4.14742 | 4.19757 | 4.84680 | 4.27243 | 4.34362 | 3.91541 | 4.04740 | 3.48268 | 1.28119 | 1.38283 | 164 | w | - | - | - |
|     | 2.68618 | 4.42225 | 2.77519 | 2.73123 | 3.46354 | 2.40513 | 3.72494 | 3.29354 | 2.67741 | 2.69355 | 4.24690 | 2.90347 | 2.73739 | 3.18146 | 2.89801 | 2.37887 | 2.77519 | 2.98518 | 4.58477 | 3.61503 |     |   |   |   |   |
|     | 0.02290 | 4.18373 | 4.90608 | 0.61958 | 0.77255 | 0.48576 | 0.95510 |         |         |         |         |         |         |         |         |         |         |         |         |         |     |   |   |   |   |
| 137 | 2.86363 | 4.89378 | 3.05423 | 2.74806 | 3.92799 | 3.47672 | 1.33751 | 3.78927 | 2.69610 | 3.35392 | 4.25364 | 3.20700 | 2.43906 | 3.15251 | 3.03925 | 2.92262 | 3.16481 | 3.45451 | 5.28716 | 3.86823 | 165 | h | - | - | - |
|     | 2.68618 | 4.42225 | 2.77519 | 2.73123 | 3.46354 | 2.40513 | 3.72494 | 3.29354 | 2.67741 | 2.69355 | 4.24690 | 2.90347 | 2.73739 | 3.18146 | 2.89801 | 2.37887 | 2.77519 | 2.98518 | 4.58477 | 3.61503 |     |   |   |   |   |
|     | 0.02290 | 4.18373 | 4.90608 | 0.61958 | 0.77255 | 0.48576 | 0.95510 |         |         |         |         |         |         |         |         |         |         |         |         |         |     |   |   |   |   |
| 138 | 3.05011 | 4.39030 | 4.72568 | 4.18406 | 3.56161 | 4.35766 | 4.82155 | 1.65819 | 4.07409 | 2.17629 | 2.92198 | 4.39711 | 4.66962 | 4.31300 | 4.26185 | 3.70281 | 3.01705 | 1.05027 | 5.38945 | 4.20442 | 166 | v | - | - | - |
|     | 2.68618 | 4.42225 | 2.77519 | 2.73123 | 3.46354 | 2.40513 | 3.72494 | 3.29354 | 2.67741 | 2.69355 | 4.24690 | 2.90347 | 2.73739 | 3.18146 | 2.89801 | 2.37887 | 2.77519 | 2.98518 | 4.58477 | 3.61503 |     |   |   |   |   |
|     | 0.02290 | 4.18373 | 4.90608 | 0.61958 | 0.77255 | 0.48576 | 0.95510 |         |         |         |         |         |         |         |         |         |         |         |         |         |     |   |   |   |   |
| 139 | 2.85906 | 4.88121 | 3.00751 | 2.76477 | 4.04416 | 2.22729 | 1.25572 | 3.89776 | 2.80827 | 3.47091 | 4.36052 | 3.21917 | 4.01240 | 3.22976 | 3.15920 | 2.92373 | 3.19060 | 3.52948 | 5.38470 | 3.98267 | 167 | h | - | - | - |
|     | 2.68618 | 4.42225 | 2.77519 | 2.73123 | 3.46354 | 2.40513 | 3.72494 | 3.29354 | 2.67741 | 2.69355 | 4.24690 | 2.90347 | 2.73739 | 3.18146 | 2.89801 | 2.37887 | 2.77519 | 2.98518 | 4.58477 | 3.61503 |     |   |   |   |   |
|     | 0.02290 | 4.18373 | 4.90608 | 0.61958 | 0.77255 | 0.48576 | 0.95510 |         |         |         |         |         |         |         |         |         |         |         |         |         |     |   |   |   |   |
| 140 | 2.13996 | 4.35207 | 3.46088 | 2.96382 | 3.93498 | 3.26357 | 3.95956 | 3.27402 | 2.93660 | 2.99544 | 3.85559 | 3.29363 | 2.17994 | 3.25234 | 3.30862 | 2.38751 | 2.11332 | 2.42869 | 5.31800 | 4.07404 | 168 | t | - | - | - |
|     | 2.68618 | 4.42225 | 2.77519 | 2.73123 | 3.46354 | 2.40513 | 3.72494 | 3.29354 | 2.67741 | 2.69355 | 4.24690 | 2.90347 | 2.73739 | 3.18146 | 2.89801 | 2.37887 | 2.77519 | 2.98518 | 4.58477 | 3.61503 |     |   |   |   |   |
|     | 0.02290 | 4.18373 | 4.90608 | 0.61958 | 0.77255 | 0.48576 | 0.95510 |         |         |         |         |         |         |         |         |         |         |         |         |         |     |   |   |   |   |
| 141 | 2.67771 | 4.30876 | 3.69652 | 3.12894 | 3.69164 | 3.95106 |         | 2.67307 | 3.04010 | 2.20199 | 2.09849 | 3.49165 | 4.06085 | 2.62794 | 3.34444 | 2.95539 | 2.64119 | 2.51669 | 4.86948 | 3.64529 | 169 | m | - | - | - |
|     | 2.68618 | 4.42225 | 2.77519 | 2.73123 | 3.46354 | 2.40513 | 3.72494 | 3.29354 | 2.67741 | 2.69355 | 4.24690 | 2.90347 | 2.73739 | 3.18146 | 2.89801 | 2.37887 | 2.77519 | 2.98518 | 4.58477 | 3.61503 |     |   |   |   |   |
|     | 0.02290 | 4.18373 | 4.90608 | 0.61958 | 0.77255 | 0.48576 | 0.95510 |         |         |         |         |         |         |         |         |         |         |         |         |         |     |   |   |   |   |
| 142 | 3.19245 | 4.51981 | 4.93452 | 4.34813 | 2.49407 | 4.43616 | 4.74082 | 2.02344 | 4.20988 | 1.24981 | 1.99569 | 4.51417 | 4.65842 | 4.27471 | 4.27280 | 3.76734 | 3.41238 | 2.07042 | 5.07170 | 3.99191 | 170 | l | - | - | - |
|     | 2.68618 | 4.42225 | 2.77519 | 2.73123 | 3.46354 | 2.40513 | 3.72494 | 3.29354 | 2.67741 | 2.69355 | 4.24690 | 2.90347 | 2.73739 | 3.18146 | 2.89801 | 2.37887 | 2.77519 | 2.98518 | 4.58477 | 3.61503 |     |   |   |   |   |
|     | 0.02290 | 4.18373 | 4.90608 | 0.61958 | 0.77255 | 0.48576 | 0.95510 |         |         |         |         |         |         |         |         |         |         |         |         |         |     |   |   |   |   |
| 143 | 2.64202 | 4.75207 | 2.78698 | 2.62317 | 4.47054 | 3.22163 | 4.00440 | 4.02416 | 2.89952 | 3.62942 | 4.47019 | 1.25087 | 3.88155 | 3.20947 | 3.31595 | 2.04428 | 3.03866 | 3.54446 | 5.75065 | 4.38126 | 171 | n | - | - | - |
|     | 2.68618 | 4.42225 | 2.77519 | 2.73123 | 3.46354 | 2.40513 | 3.72494 | 3.29354 | 2.67741 | 2.69355 | 4.24690 | 2.90347 | 2.73739 | 3.18146 | 2.89801 | 2.37887 | 2.77519 | 2.98518 | 4.58477 | 3.61503 |     |   |   |   |   |
|     | 0.02290 | 4.18373 | 4.90608 | 0.61958 | 0.77255 | 0.48576 | 0.95510 |         |         |         |         |         |         |         |         |         |         |         |         |         |     |   |   |   |   |
| 144 | 3.16941 | 4.46802 | 4.94256 | 4.39120 | 3.41721 | 4.51983 | 4.93908 | 1.64487 | 4.27777 | 1.67951 | 2.64397 | 4.58290 | 4.76919 | 4.44210 | 4.40998 | 3.86998 | 3.40728 | 1.21839 | 5.35780 | 4.22518 | 172 | v | - | - | - |
|     | 2.68618 | 4.42225 | 2.77519 | 2.73123 | 3.46354 | 2.40513 | 3.72494 | 3.29354 | 2.67741 | 2.69355 | 4.24690 | 2.90347 | 2.73739 | 3.18146 | 2.89801 | 2.37887 | 2.77519 | 2.98518 | 4.58477 | 3.61503 |     |   |   |   |   |
|     | 0.02290 | 4.18373 | 4.90608 | 0.61958 | 0.77255 | 0.48576 | 0.95510 |         |         |         |         |         |         |         |         |         |         |         |         |         |     |   |   |   |   |
| 145 | 2.73640 | 5.11878 | 2.91789 | 1.79868 | 4.44927 | 3.45940 | 3.62826 | 3.88920 | 1.84611 | 3.39173 | 3.73647 | 2.94239 | 3.86551 | 2.36594 | 2.67296 | 2.      |         |         |         |         |     |   |   |   |   |





|     |         |         |         |         |         |         |         |         |         |         |         |         |         |         |         |         |         |         |         |         |     |   |   |   |   |
|-----|---------|---------|---------|---------|---------|---------|---------|---------|---------|---------|---------|---------|---------|---------|---------|---------|---------|---------|---------|---------|-----|---|---|---|---|
| 195 | 2.68926 | 4.40136 | 3.74376 | 3.30372 | 3.31289 | 3.26597 | 4.00679 | 3.08202 | 3.09565 | 2.76650 | 3.73235 | 3.55575 | 4.05908 | 3.49719 | 3.34294 | 2.91720 | 2.47369 | 2.83841 | 1.39596 | 3.41754 | 224 | w | - | - | - |
|     | 2.68618 | 4.42225 | 2.77519 | 2.73123 | 3.46354 | 2.40513 | 3.72494 | 3.29354 | 2.67741 | 2.69355 | 4.24690 | 2.90347 | 2.73739 | 3.18146 | 2.89801 | 2.37887 | 2.77519 | 2.98518 | 4.58477 | 3.61503 |     |   |   |   |   |
|     | 0.02290 | 4.18373 | 4.90608 | 0.61958 | 0.77255 | 0.48576 | 0.95510 |         |         |         |         |         |         |         |         |         |         |         |         |         |     |   |   |   |   |
| 196 | 2.59227 | 4.13740 | 3.83760 | 3.25947 | 2.96765 | 3.22928 | 3.94171 | 2.48976 | 3.17080 | 2.17808 | 3.08411 | 3.54873 | 4.02844 | 3.42473 | 3.42028 | 2.73932 | 2.33571 | 2.23391 | 4.74022 | 2.72035 | 225 | l | - | - | - |
|     | 2.68618 | 4.42225 | 2.77519 | 2.73123 | 3.46354 | 2.40513 | 3.72494 | 3.29354 | 2.67741 | 2.69355 | 4.24690 | 2.90347 | 2.73739 | 3.18146 | 2.89801 | 2.37887 | 2.77519 | 2.98518 | 4.58477 | 3.61503 |     |   |   |   |   |
|     | 0.02290 | 4.18373 | 4.90608 | 0.61958 | 0.77255 | 0.48576 | 0.95510 |         |         |         |         |         |         |         |         |         |         |         |         |         |     |   |   |   |   |
| 197 | 1.94498 | 4.17759 | 4.07880 | 3.50387 | 2.64254 | 3.66359 | 4.11452 | 2.27462 | 3.39955 | 1.88692 | 3.23128 | 3.74910 | 4.16016 | 3.63461 | 3.61223 | 3.08317 | 2.92715 | 2.05849 | 4.82407 | 3.62425 | 226 | l | - | - | - |
|     | 2.68618 | 4.42225 | 2.77519 | 2.73123 | 3.46354 | 2.40513 | 3.72494 | 3.29354 | 2.67741 | 2.69355 | 4.24690 | 2.90347 | 2.73739 | 3.18146 | 2.89801 | 2.37887 | 2.77519 | 2.98518 | 4.58477 | 3.61503 |     |   |   |   |   |
|     | 0.02290 | 4.18373 | 4.90608 | 0.61958 | 0.77255 | 0.48576 | 0.95510 |         |         |         |         |         |         |         |         |         |         |         |         |         |     |   |   |   |   |
| 198 | 2.80192 | 4.40137 | 4.79333 | 4.23915 | 3.31079 | 4.38001 | 4.79197 | 1.60077 | 4.12711 | 1.50395 | 3.26571 | 4.43072 | 4.66471 | 4.31487 | 4.27613 | 3.71910 | 3.31404 | 1.43436 | 5.28203 | 4.12440 | 227 | v | - | - | - |
|     | 2.68618 | 4.42225 | 2.77519 | 2.73123 | 3.46354 | 2.40513 | 3.72494 | 3.29354 | 2.67741 | 2.69355 | 4.24690 | 2.90347 | 2.73739 | 3.18146 | 2.89801 | 2.37887 | 2.77519 | 2.98518 | 4.58477 | 3.61503 |     |   |   |   |   |
|     | 0.02290 | 4.18373 | 4.90608 | 0.61958 | 0.77255 | 0.48576 | 0.95510 |         |         |         |         |         |         |         |         |         |         |         |         |         |     |   |   |   |   |
| 199 | 1.79454 | 4.30480 | 3.51540 | 3.34963 | 4.56937 | 0.99193 | 4.47264 | 3.95705 | 3.50685 | 3.68889 | 4.53570 | 3.47208 | 3.83241 | 3.77018 | 3.78855 | 2.55358 | 2.88733 | 3.37149 | 5.89229 | 4.71325 | 228 | g | - | - | - |
|     | 2.68618 | 4.42225 | 2.77519 | 2.73123 | 3.46354 | 2.40513 | 3.72494 | 3.29354 | 2.67741 | 2.69355 | 4.24690 | 2.90347 | 2.73739 | 3.18146 | 2.89801 | 2.37887 | 2.77519 | 2.98518 | 4.58477 | 3.61503 |     |   |   |   |   |
|     | 0.02290 | 4.18373 | 4.90608 | 0.61958 | 0.77255 | 0.48576 | 0.95510 |         |         |         |         |         |         |         |         |         |         |         |         |         |     |   |   |   |   |
| 200 | 2.22569 | 4.14312 | 4.05214 | 3.47430 | 3.14598 | 3.44616 | 4.08579 | 2.06953 | 3.37109 | 2.11099 | 3.12841 | 3.71920 | 4.13544 | 3.60941 | 3.58473 | 3.05474 | 2.66633 | 1.80946 | 4.81037 | 3.61299 | 229 | v | - | - | - |
|     | 2.68618 | 4.42225 | 2.77519 | 2.73123 | 3.46354 | 2.40513 | 3.72494 | 3.29354 | 2.67741 | 2.69355 | 4.24690 | 2.90347 | 2.73739 | 3.18146 | 2.89801 | 2.37887 | 2.77519 | 2.98518 | 4.58477 | 3.61503 |     |   |   |   |   |
|     | 0.02290 | 4.18373 | 4.90608 | 0.61958 | 0.77255 | 0.48576 | 0.95510 |         |         |         |         |         |         |         |         |         |         |         |         |         |     |   |   |   |   |
| 201 | 1.64154 | 3.90137 | 3.73039 | 3.16555 | 3.11262 | 3.93483 | 2.69646 | 3.09044 | 2.43426 | 3.34638 | 3.47885 | 3.99405 | 3.36403 | 3.37667 | 2.86340 | 2.82796 | 2.39239 | 4.09844 | 3.59891 | 230     | a   | - | - | - |   |
|     | 2.68618 | 4.42225 | 2.77520 | 2.73124 | 3.46354 | 2.40510 | 3.72495 | 3.29354 | 2.67741 | 2.69351 | 4.24690 | 2.90347 | 2.73740 | 3.18147 | 2.89801 | 2.37887 | 2.77520 | 2.98519 | 4.58477 | 3.61503 |     |   |   |   |   |
|     | 0.03975 | 3.45565 | 4.90608 | 0.63180 | 0.75850 | 0.48576 | 0.95510 |         |         |         |         |         |         |         |         |         |         |         |         |         |     |   |   |   |   |
| 202 | 3.60986 | 4.98319 | 4.44333 | 4.11568 | 2.39877 | 4.21320 | 3.81027 | 3.50308 | 3.77848 | 2.84891 | 4.10217 | 4.12148 | 4.64149 | 4.09197 | 3.89659 | 3.76199 | 3.87464 | 3.41432 | 0.81678 | 2.29051 | 233 | w | - | - | - |
|     | 2.68618 | 4.42225 | 2.77519 | 2.73123 | 3.46354 | 2.40513 | 3.72494 | 3.29354 | 2.67741 | 2.69355 | 4.24690 | 2.90347 | 2.73739 | 3.18146 | 2.89801 | 2.37887 | 2.77519 | 2.98518 | 4.58477 | 3.61503 |     |   |   |   |   |
|     | 0.02290 | 4.18373 | 4.90608 | 0.61958 | 0.77255 | 0.48576 | 0.95510 |         |         |         |         |         |         |         |         |         |         |         |         |         |     |   |   |   |   |
| 203 | 3.09217 | 4.44966 | 4.76873 | 4.18112 | 3.11044 | 4.30100 | 4.59684 | 1.71683 | 4.03330 | 1.12100 | 2.66916 | 4.35453 | 4.55716 | 4.14554 | 4.12441 | 3.62211 | 3.31467 | 2.25001 | 4.26942 | 3.88748 | 234 | l | - | - | - |
|     | 2.68618 | 4.42225 | 2.77519 | 2.73123 | 3.46354 | 2.40513 | 3.72494 | 3.29354 | 2.67741 | 2.69355 | 4.24690 | 2.90347 | 2.73739 | 3.18146 | 2.89801 | 2.37887 | 2.77519 | 2.98518 | 4.58477 | 3.61503 |     |   |   |   |   |
|     | 0.03975 | 4.18373 | 3.74115 | 0.61958 | 0.77255 | 0.48576 | 0.95510 |         |         |         |         |         |         |         |         |         |         |         |         |         |     |   |   |   |   |
| 204 | 2.56998 | 4.07042 | 4.10609 | 3.51909 | 2.92894 | 3.16774 | 4.00492 | 2.41569 | 3.39131 | 1.68249 | 3.16496 | 3.70901 | 4.08167 | 3.60314 | 3.55777 | 3.00461 | 2.83892 | 2.07814 | 4.10087 | 3.02557 | 235 | l | - | - | - |
|     | 2.68618 | 4.42225 | 2.77519 | 2.73123 | 3.46354 | 2.40513 | 3.72494 | 3.29354 | 2.67741 | 2.69355 | 4.24690 | 2.90347 | 2.73739 | 3.18146 | 2.89801 | 2.37887 | 2.77519 | 2.98518 | 4.58477 | 3.61503 |     |   |   |   |   |
|     | 0.02329 | 4.16727 | 4.88962 | 0.61958 | 0.77255 | 0.47337 | 0.97525 |         |         |         |         |         |         |         |         |         |         |         |         |         |     |   |   |   |   |
| 205 | 3.97450 | 5.07815 | 4.98313 | 4.75448 | 1.53797 | 4.64533 | 3.50205 | 3.67162 | 4.56228 | 2.96040 | 4.22903 | 4.26378 | 4.92316 | 4.37787 | 4.48113 | 4.01795 | 4.17987 | 3.57965 | 2.00357 | 1.01757 | 236 | y | - | - | - |
|     | 2.68618 | 4.42225 | 2.77519 | 2.73123 | 3.46354 | 2.40513 | 3.72494 | 3.29354 | 2.67741 | 2.69355 | 4.24690 | 2.90347 | 2.73739 | 3.18146 | 2.89801 | 2.37887 | 2.77519 | 2.98518 | 4.58477 | 3.61503 |     |   |   |   |   |
|     | 0.02290 | 4.18373 | 4.90608 | 0.61958 | 0.77255 | 0.48576 | 0.95510 |         |         |         |         |         |         |         |         |         |         |         |         |         |     |   |   |   |   |
| 206 | 3.60996 | 4.95921 | 4.56569 | 4.23562 | 2.26988 | 4.25249 | 3.83080 | 3.38723 | 3.97713 | 2.71464 | 4.00182 | 4.18930 | 4.67233 | 4.18521 | 4.07486 | 3.78835 | 3.87972 | 3.32848 | 0.83527 | 2.35238 | 237 | w | - | - | - |
|     | 2.68619 | 4.42226 | 2.77521 | 2.73124 | 3.46355 | 2.40511 | 3.72496 | 3.29355 | 2.67742 | 2.69342 | 4.24691 | 2.90348 | 2.73741 | 3.18147 | 2.89802 | 2.37888 | 2.77521 | 2.98519 | 4.58478 | 3.61504 |     |   |   |   |   |
|     | 0.09623 | 2.47283 | 4.90608 | 0.38759 | 1.13536 | 0.48576 | 0.95510 |         |         |         |         |         |         |         |         |         |         |         |         |         |     |   |   |   |   |
| 207 | 2.49377 | 3.53015 | 4.37199 | 3.78086 | 2.53051 | 3.83124 | 4.16662 | 2.09839 | 3.62851 | 2.04654 | 3.05979 | 3.90003 | 4.18985 | 3.81333 | 3.73843 | 3.06962 | 2.80807 | 1.68516 | 4.74379 | 3.55989 | 239 | v | - | - | - |
|     | 2.68618 | 4.42225 | 2.77519 | 2.73123 | 3.46354 | 2.40513 | 3.72494 | 3.29354 | 2.67741 | 2.69355 | 4.24690 | 2.90347 | 2.73739 | 3.18146 | 2.89801 | 2.37887 | 2.77519 | 2.98518 | 4.58477 | 3.61503 |     |   |   |   |   |
|     | 0.02290 | 4.18373 | 4.90608 | 0.61958 | 0.77255 | 0.48576 | 0.95510 |         |         |         |         |         |         |         |         |         |         |         |         |         |     |   |   |   |   |
| 208 | 2.53059 | 4.62243 | 3.16315 | 2.59885 | 3.65472 | 3.27788 | 3.70499 | 3.01335 | 2.36116 | 2.63979 | 3.71104 | 3.08497 | 3.87896 | 2.90565 | 2.13214 | 2.55271 | 2.84780 | 2.74361 | 5.15909 | 3.87096 | 240 | r | - | - | - |
|     | 2.68618 | 4.42225 | 2.77519 | 2.73123 | 3.46354 | 2.40513 | 3.72494 | 3.29354 | 2.67741 | 2.69355 | 4.24690 | 2.90347 | 2.73739 | 3.18146 | 2.89801 | 2.37887 | 2.77519 | 2.98518 | 4.58477 | 3.61503 |     |   |   |   |   |
|     | 0.02290 | 4.18373 | 4.90608 | 0.61958 | 0.77255 | 0.48576 | 0.95510 |         |         |         |         |         |         |         |         |         |         |         |         |         |     |   |   |   |   |
| 209 | 3.02528 | 5.21262 | 3.43853 | 2.77106 | 4.64824 | 3.69284 | 3.66291 | 4.00645 | 1.45378 | 3.45896 | 4.30098 | 2.99421 | 4.05578 | 2.79018 | 1.48749 | 3.01565 | 3.20198 | 3.42684 | 5.52134 | 4.31765 | 241 | k | - | - | - |
|     | 2.68618 | 4.42225 | 2.77519 | 2.73123 | 3.46354 | 2.40513 | 3.72494 | 3.29354 | 2.67741 | 2.69355 | 4.24690 | 2.90347 | 2.73739 | 3.18146 | 2.89801 | 2.37887 | 2.77519 | 2.98518 | 4.58477 | 3.61503 |     |   |   |   |   |
|     | 0.02290 | 4.18373 | 4.90608 | 0.61958 | 0.77255 | 0.48576 | 0.95510 |         |         |         |         |         |         |         |         |         |         |         |         |         |     |   |   |   |   |
| 210 | 2.84884 | 4.98534 | 3.14570 | 2.66448 | 4.38362 | 3.53206 | 3.73531 | 3.78335 | 2.00820 | 3.33030 | 4.17682 | 3.12776 | 1.64537 | 2.88885 | 2.26353 | 2.87755 | 3.08770 | 3.44722 | 5.48563 | 4.22383 | 242 | p | - | - | - |
|     | 2.68618 | 4.42225 | 2.77519 | 2.73123 | 3.46354 | 2.40513 | 3.72494 | 3.29354 | 2.67741 | 2.69355 | 4.24690 | 2.90347 | 2.73739 | 3.18146 | 2.89801 | 2.37887 | 2.77519 | 2.98518 | 4.58477 | 3.61503 |     |   |   |   |   |
|     | 0.21185 | 4.18373 | 1.73911 | 0.61958 | 0.77255 | 0.48576 | 0.95510 |         |         |         |         |         |         |         |         |         |         |         |         |         |     |   |   |   |   |
| 211 | 2.50946 | 4.21604 | 3.60216 | 3.03338 | 3.34031 | 2.74026 | 3.87323 | 2.46142 | 2.95586 | 2.09248 | 2.96021 | 3.39616 | 3.97039 | 3.25403 | 3.14003 | 2.85209 | 2.81246 | 2.22360 | 4.83166 | 3.61318 | 243 | l | - | - | - |
|     | 2.68618 | 4.42225 | 2.77519 | 2.73123 | 3.46354 | 2.40513 | 3.72494 | 3.29354 | 2.67741 | 2.69355 | 4.24690 | 2.90347 | 2.73739 | 3.18146 | 2.89801 | 2.37887 | 2.77519 | 2.98518 | 4.58477 | 3.61503 |     |   |   |   |   |
|     | 0.02760 | 3.99948 | 4.72183 | 0.61958 | 0.77255 | 0.38281 | 1.14553 |         |         |         |         |         |         |         |         |         |         |         |         |         |     |   |   |   |   |
| 212 | 2.94571 | 4.39407 | 4.38242 | 3.85628 | 1.44937 | 4.03724 | 4.27897 | 2.07280 | 3.72838 | 2.01269 | 3.23864 | 4.04170 | 4.40256 | 3.93502 | 3.90249 | 3.36    |         |         |         |         |     |   |   |   |   |

|     |         |         |         |         |         |         |         |         |         |         |         |         |         |         |         |         |         |         |         |         |     |   |   |   |   |
|-----|---------|---------|---------|---------|---------|---------|---------|---------|---------|---------|---------|---------|---------|---------|---------|---------|---------|---------|---------|---------|-----|---|---|---|---|
|     | 2.68618 | 4.42225 | 2.77519 | 2.73123 | 3.46354 | 2.40513 | 3.72494 | 3.29354 | 2.67741 | 2.69355 | 4.24690 | 2.90347 | 2.73739 | 3.18146 | 2.89801 | 2.37887 | 2.77519 | 2.98518 | 4.58477 | 3.61503 |     |   |   |   |   |
|     | 0.02290 | 4.18373 | 4.90608 | 0.61958 | 0.77255 | 0.48576 | 0.95510 |         |         |         |         |         |         |         |         |         |         |         |         |         |     |   |   |   |   |
| 218 | 2.29065 | 4.40503 | 3.23965 | 2.79451 | 3.55568 | 3.54712 | 3.78620 | 2.92369 | 2.74660 | 2.24881 | 2.76702 | 3.23157 | 3.92881 | 2.82328 | 2.71950 | 2.70727 | 2.77742 | 2.68664 | 4.24527 | 3.72483 | 250 | l | - | - | - |
|     | 2.68618 | 4.42225 | 2.77519 | 2.73123 | 3.46354 | 2.40513 | 3.72494 | 3.29354 | 2.67741 | 2.69355 | 4.24690 | 2.90347 | 2.73739 | 3.18146 | 2.89801 | 2.37887 | 2.77519 | 2.98518 | 4.58477 | 3.61503 |     |   |   |   |   |
|     | 0.02290 | 4.18373 | 4.90608 | 0.61958 | 0.77255 | 0.48576 | 0.95510 |         |         |         |         |         |         |         |         |         |         |         |         |         |     |   |   |   |   |
| 219 | 2.50115 | 4.01780 | 4.30027 | 3.74033 | 3.43940 | 3.66153 | 4.36164 | 1.99430 | 3.63032 | 2.04645 | 3.37198 | 3.95874 | 4.32152 | 3.87686 | 3.83630 | 3.25823 | 3.03949 | 1.28177 | 5.05635 | 3.85591 | 251 | v | - | - | - |
|     | 2.68618 | 4.42225 | 2.77519 | 2.73123 | 3.46354 | 2.40513 | 3.72494 | 3.29354 | 2.67741 | 2.69355 | 4.24690 | 2.90347 | 2.73739 | 3.18146 | 2.89801 | 2.37887 | 2.77519 | 2.98518 | 4.58477 | 3.61503 |     |   |   |   |   |
|     | 0.02290 | 4.18373 | 4.90608 | 0.61958 | 0.77255 | 0.48576 | 0.95510 |         |         |         |         |         |         |         |         |         |         |         |         |         |     |   |   |   |   |
| 220 | 2.15565 | 5.01133 | 2.57810 | 2.15238 | 4.30368 | 3.08365 | 3.61512 | 3.75562 | 2.38504 | 3.29457 | 4.07011 | 2.83224 | 3.80755 | 2.60420 | 2.79762 | 2.46030 | 2.82485 | 3.37410 | 5.47779 | 3.49414 | 252 | e | - | - | - |
|     | 2.68618 | 4.42225 | 2.77519 | 2.73123 | 3.46354 | 2.40513 | 3.72494 | 3.29354 | 2.67741 | 2.69355 | 4.24690 | 2.90347 | 2.73739 | 3.18146 | 2.89801 | 2.37887 | 2.77519 | 2.98518 | 4.58477 | 3.61503 |     |   |   |   |   |
|     | 0.02290 | 4.18373 | 4.90608 | 0.61958 | 0.77255 | 0.48576 | 0.95510 |         |         |         |         |         |         |         |         |         |         |         |         |         |     |   |   |   |   |
| 221 | 1.91880 | 4.59222 | 3.06816 | 2.44873 | 3.83229 | 3.45676 | 3.73940 | 3.19982 | 2.60930 | 2.63804 | 3.72944 | 3.09456 | 3.87378 | 2.94584 | 3.03747 | 2.33340 | 2.71629 | 2.69218 | 5.18373 | 3.89518 | 253 | a | - | - | - |
|     | 2.68618 | 4.42225 | 2.77519 | 2.73123 | 3.46354 | 2.40513 | 3.72494 | 3.29354 | 2.67741 | 2.69355 | 4.24690 | 2.90347 | 2.73739 | 3.18146 | 2.89801 | 2.37887 | 2.77519 | 2.98518 | 4.58477 | 3.61503 |     |   |   |   |   |
|     | 0.02290 | 4.18373 | 4.90608 | 0.61958 | 0.77255 | 0.48576 | 0.95510 |         |         |         |         |         |         |         |         |         |         |         |         |         |     |   |   |   |   |
| 222 | 2.63635 | 4.66796 | 2.94058 | 2.35820 | 4.21534 | 1.38590 | 3.94534 | 3.55463 | 2.82061 | 3.25851 | 4.13064 | 3.12131 | 3.89885 | 3.15618 | 3.22304 | 2.73200 | 2.98337 | 2.75259 | 5.53737 | 4.23536 | 254 | g | - | - | - |
|     | 2.68618 | 4.42225 | 2.77519 | 2.73123 | 3.46354 | 2.40513 | 3.72494 | 3.29354 | 2.67741 | 2.69355 | 4.24690 | 2.90347 | 2.73739 | 3.18146 | 2.89801 | 2.37887 | 2.77519 | 2.98518 | 4.58477 | 3.61503 |     |   |   |   |   |
|     | 0.02290 | 4.18373 | 4.90608 | 0.61958 | 0.77255 | 0.48576 | 0.95510 |         |         |         |         |         |         |         |         |         |         |         |         |         |     |   |   |   |   |
| 223 | 2.75742 | 5.02147 | 3.11339 | 2.44073 | 4.33923 | 3.52088 | 3.63533 | 3.74857 | 1.71317 | 2.75393 | 4.08863 | 3.02671 | 3.33992 | 2.76436 | 2.08106 | 2.68077 | 2.97093 | 3.40106 | 5.44140 | 4.13783 | 255 | k | - | - | - |
|     | 2.68618 | 4.42225 | 2.77519 | 2.73123 | 3.46354 | 2.40513 | 3.72494 | 3.29354 | 2.67741 | 2.69355 | 4.24690 | 2.90347 | 2.73739 | 3.18146 | 2.89801 | 2.37887 | 2.77519 | 2.98518 | 4.58477 | 3.61503 |     |   |   |   |   |
|     | 0.02290 | 4.18373 | 4.90608 | 0.61958 | 0.77255 | 0.48576 | 0.95510 |         |         |         |         |         |         |         |         |         |         |         |         |         |     |   |   |   |   |
| 224 | 2.10705 | 4.46790 | 2.85127 | 1.97204 | 4.22283 | 3.19096 | 3.62790 | 3.66066 | 2.22340 | 3.22338 | 4.01151 | 2.92211 | 3.49549 | 2.75640 | 2.87576 | 2.62342 | 2.85569 | 3.21775 | 5.42655 | 4.06376 | 256 | e | - | - | - |
|     | 2.68618 | 4.42225 | 2.77519 | 2.73123 | 3.46354 | 2.40513 | 3.72494 | 3.29354 | 2.67741 | 2.69355 | 4.24690 | 2.90347 | 2.73739 | 3.18146 | 2.89801 | 2.37887 | 2.77519 | 2.98518 | 4.58477 | 3.61503 |     |   |   |   |   |
|     | 0.02290 | 4.18373 | 4.90608 | 0.61958 | 0.77255 | 0.48576 | 0.95510 |         |         |         |         |         |         |         |         |         |         |         |         |         |     |   |   |   |   |
| 225 | 2.83983 | 5.37153 | 1.68565 | 1.65536 | 4.67000 | 3.16072 | 3.30362 | 4.16875 | 2.60160 | 3.44302 | 4.44937 | 2.66500 | 3.86868 | 2.86035 | 3.13984 | 2.76415 | 3.09574 | 3.74358 | 5.81131 | 4.35714 | 257 | e | - | - | - |
|     | 2.68618 | 4.42225 | 2.77519 | 2.73123 | 3.46354 | 2.40513 | 3.72494 | 3.29354 | 2.67741 | 2.69355 | 4.24690 | 2.90347 | 2.73739 | 3.18146 | 2.89801 | 2.37887 | 2.77519 | 2.98518 | 4.58477 | 3.61503 |     |   |   |   |   |
|     | 0.02290 | 4.18373 | 4.90608 | 0.61958 | 0.77255 | 0.48576 | 0.95510 |         |         |         |         |         |         |         |         |         |         |         |         |         |     |   |   |   |   |
| 226 | 2.78307 | 5.25276 | 2.23359 | 1.45386 | 4.57035 | 3.35722 | 3.70533 | 4.04831 | 2.54605 | 3.55790 | 4.34535 | 2.83327 | 3.85569 | 2.83630 | 2.93972 | 2.41297 | 2.80177 | 3.63642 | 5.72115 | 4.29420 | 258 | e | - | - | - |
|     | 2.68618 | 4.42225 | 2.77519 | 2.73123 | 3.46354 | 2.40513 | 3.72494 | 3.29354 | 2.67741 | 2.69355 | 4.24690 | 2.90347 | 2.73739 | 3.18146 | 2.89801 | 2.37887 | 2.77519 | 2.98518 | 4.58477 | 3.61503 |     |   |   |   |   |
|     | 0.02290 | 4.18373 | 4.90608 | 0.61958 | 0.77255 | 0.48576 | 0.95510 |         |         |         |         |         |         |         |         |         |         |         |         |         |     |   |   |   |   |
| 227 | 2.68167 | 4.42009 | 4.04791 | 3.51997 | 3.32523 | 3.90866 | 4.26859 | 2.44502 | 3.35144 | 1.16104 | 3.22294 | 3.82644 | 4.28783 | 3.31458 | 3.59215 | 3.22962 | 3.12541 | 2.14238 | 5.04644 | 3.86515 | 259 | l | - | - | - |
|     | 2.68618 | 4.42225 | 2.77519 | 2.73123 | 3.46354 | 2.40513 | 3.72495 | 3.29354 | 2.67741 | 2.69355 | 4.24690 | 2.90347 | 2.73740 | 3.18146 | 2.89801 | 2.37887 | 2.77520 | 2.98518 | 4.58477 | 3.61503 |     |   |   |   |   |
|     | 0.03975 | 3.45565 | 4.90608 | 0.54229 | 0.87088 | 0.48576 | 0.95510 |         |         |         |         |         |         |         |         |         |         |         |         |         |     |   |   |   |   |
| 228 | 3.13461 | 4.43684 | 4.92894 | 4.38718 | 2.62859 | 4.47025 | 4.87334 | 1.28866 | 4.27176 | 1.98156 | 3.27276 | 4.54896 | 4.74225 | 4.43870 | 4.39685 | 3.82401 | 3.37731 | 1.39799 | 5.28856 | 4.08584 | 261 | i | - | - | - |
|     | 2.68618 | 4.42225 | 2.77519 | 2.73123 | 3.46354 | 2.40513 | 3.72494 | 3.29354 | 2.67741 | 2.69355 | 4.24690 | 2.90347 | 2.73739 | 3.18146 | 2.89801 | 2.37887 | 2.77519 | 2.98518 | 4.58477 | 3.61503 |     |   |   |   |   |
|     | 0.02290 | 4.18373 | 4.90608 | 0.61958 | 0.77255 | 0.48576 | 0.95510 |         |         |         |         |         |         |         |         |         |         |         |         |         |     |   |   |   |   |
| 229 | 2.43880 | 4.46610 | 3.20609 | 2.82990 | 4.29717 | 2.61845 | 4.01331 | 3.72369 | 2.90223 | 3.35931 | 4.17539 | 2.75178 | 3.81086 | 3.21674 | 3.30600 | 1.84993 | 1.64647 | 3.26364 | 5.59591 | 4.31938 | 262 | t | - | - | - |
|     | 2.68618 | 4.42225 | 2.77519 | 2.73123 | 3.46354 | 2.40513 | 3.72494 | 3.29354 | 2.67741 | 2.69355 | 4.24690 | 2.90347 | 2.73739 | 3.18146 | 2.89801 | 2.37887 | 2.77519 | 2.98518 | 4.58477 | 3.61503 |     |   |   |   |   |
|     | 0.02290 | 4.18373 | 4.90608 | 0.61958 | 0.77255 | 0.48576 | 0.95510 |         |         |         |         |         |         |         |         |         |         |         |         |         |     |   |   |   |   |
| 230 | 2.26257 | 5.02089 | 2.32034 | 2.35688 | 4.37849 | 3.03824 | 3.68741 | 3.83131 | 2.30570 | 3.37836 | 4.16757 | 2.89570 | 2.32105 | 2.82050 | 2.98704 | 2.62895 | 2.93377 | 3.44037 | 5.56772 | 4.18407 | 263 | a | - | - | - |
|     | 2.68618 | 4.42225 | 2.77519 | 2.73123 | 3.46354 | 2.40513 | 3.72494 | 3.29354 | 2.67741 | 2.69355 | 4.24690 | 2.90347 | 2.73739 | 3.18146 | 2.89801 | 2.37887 | 2.77519 | 2.98518 | 4.58477 | 3.61503 |     |   |   |   |   |
|     | 0.02290 | 4.18373 | 4.90608 | 0.61958 | 0.77255 | 0.48576 | 0.95510 |         |         |         |         |         |         |         |         |         |         |         |         |         |     |   |   |   |   |
| 231 | 2.58242 | 4.84753 | 2.72930 | 2.39610 | 4.09672 | 2.90722 | 3.63567 | 3.51862 | 2.34993 | 2.74910 | 3.48220 | 2.95460 | 3.82440 | 2.37587 | 2.89053 | 2.63675 | 2.52206 | 3.09064 | 5.34322 | 4.00034 | 264 | k | - | - | - |
|     | 2.68618 | 4.42225 | 2.77519 | 2.73123 | 3.46354 | 2.40513 | 3.72494 | 3.29354 | 2.67741 | 2.69355 | 4.24690 | 2.90347 | 2.73739 | 3.18146 | 2.89801 | 2.37887 | 2.77519 | 2.98518 | 4.58477 | 3.61503 |     |   |   |   |   |
|     | 0.02290 | 4.18373 | 4.90608 | 0.61958 | 0.77255 | 0.48576 | 0.95510 |         |         |         |         |         |         |         |         |         |         |         |         |         |     |   |   |   |   |
| 232 | 3.06184 | 5.63171 | 1.01028 | 1.93729 | 4.93530 | 3.30634 | 3.88263 | 4.43733 | 2.93043 | 3.95516 | 4.82203 | 2.77365 | 3.94585 | 3.05479 | 3.54099 | 2.94137 | 3.13309 | 4.01085 | 6.12622 | 4.60522 | 265 | d | - | - | - |
|     | 2.68618 | 4.42225 | 2.77519 | 2.73123 | 3.46354 | 2.40513 | 3.72494 | 3.29354 | 2.67741 | 2.69355 | 4.24690 | 2.90347 | 2.73739 | 3.18146 | 2.89801 | 2.37887 | 2.77519 | 2.98518 | 4.58477 | 3.61503 |     |   |   |   |   |
|     | 0.02290 | 4.18373 | 4.90608 | 0.61958 | 0.77255 | 0.48576 | 0.95510 |         |         |         |         |         |         |         |         |         |         |         |         |         |     |   |   |   |   |
| 233 | 3.07390 | 5.25848 | 3.49111 | 2.80269 | 4.71761 | 3.72446 | 3.66096 | 4.06032 | 1.45363 | 3.49048 | 4.33640 | 3.22541 | 4.07875 | 2.61873 | 1.44641 | 3.05786 | 2.97136 | 3.72491 | 5.53685 | 4.35167 | 266 | r | - | - | - |
|     | 2.68618 | 4.42225 | 2.77519 | 2.73123 | 3.46354 | 2.40513 | 3.72494 | 3.29354 | 2.67741 | 2.69355 | 4.24690 | 2.90347 | 2.73739 | 3.18146 | 2.89801 | 2.37887 | 2.77519 | 2.98518 | 4.58477 | 3.61503 |     |   |   |   |   |
|     | 0.02290 | 4.18373 | 4.90608 | 0.61958 | 0.77255 | 0.48576 | 0.95510 |         |         |         |         |         |         |         |         |         |         |         |         |         |     |   |   |   |   |
| 234 | 2.70382 | 5.02816 | 3.03215 | 2.45701 | 4.34488 | 3.47642 | 3.61865 | 3.77271 | 1.80988 | 3.17765 | 4.08936 | 2.79259 | 3.86186 | 2.32813 | 2.39191 | 2.69700 | 2.56853 | 3.19167 | 5.45932 | 4.12580 | 267 | k | - | - | - |
|     | 2.68618 | 4.42225 | 2.77519 | 2.73123 | 3.46354 | 2.40513 | 3.72494 | 3.29354 | 2.67741 | 2.69355 | 4.24690 | 2.90347 | 2.73739 | 3.18146 | 2.89801 | 2.37887 | 2.77519 | 2.98518 | 4.58477 | 3.61503 |     |   |   |   |   |
|     | 0.02290 | 4.18373 | 4.90608 | 0.61958 | 0.      |         |         |         |         |         |         |         |         |         |         |         |         |         |         |         |     |   |   |   |   |



|     |         |         |         |         |         |         |         |         |         |         |         |         |         |         |         |         |         |         |         |         |     |   |   |   |   |
|-----|---------|---------|---------|---------|---------|---------|---------|---------|---------|---------|---------|---------|---------|---------|---------|---------|---------|---------|---------|---------|-----|---|---|---|---|
| 262 | 2.97110 | 4.39540 | 4.52766 | 4.02545 | 3.62655 | 4.15252 | 4.74775 | 1.09628 | 3.90001 | 2.26447 | 3.47497 | 4.24176 | 4.55804 | 4.18843 | 4.11750 | 3.52236 | 2.47287 | 1.72410 | 5.42706 | 4.22469 | 295 | i | - | - | - |
|     | 2.68618 | 4.42225 | 2.77519 | 2.73123 | 3.46354 | 2.40513 | 3.72494 | 3.29354 | 2.67741 | 2.69355 | 4.24690 | 2.90347 | 2.73739 | 3.18146 | 2.89801 | 2.37887 | 2.77519 | 2.98518 | 4.58477 | 3.61503 |     |   |   |   |   |
|     | 0.02290 | 4.18373 | 4.90608 | 0.61958 | 0.77255 | 0.48576 | 0.95510 |         |         |         |         |         |         |         |         |         |         |         |         |         |     |   |   |   |   |
| 263 | 3.22031 | 4.91301 | 3.86274 | 3.75476 | 4.70463 | 3.58351 | 4.79631 | 4.34360 | 3.84144 | 3.93066 | 5.00116 | 4.02490 | 0.41006 | 4.22005 | 4.04145 | 3.39999 | 3.68818 | 3.95083 | 5.79302 | 4.83303 | 296 | P | - | - | - |
|     | 2.68618 | 4.42225 | 2.77519 | 2.73123 | 3.46354 | 2.40513 | 3.72494 | 3.29354 | 2.67741 | 2.69355 | 4.24690 | 2.90347 | 2.73739 | 3.18146 | 2.89801 | 2.37887 | 2.77519 | 2.98518 | 4.58477 | 3.61503 |     |   |   |   |   |
|     | 0.02290 | 4.18373 | 4.90608 | 0.61958 | 0.77255 | 0.48576 | 0.95510 |         |         |         |         |         |         |         |         |         |         |         |         |         |     |   |   |   |   |
| 264 | 3.46170 | 4.77263 | 5.02135 | 4.49902 | 3.17908 | 4.71252 | 5.03922 | 1.90253 | 4.30604 | 0.76063 | 2.99077 | 4.75424 | 4.89811 | 4.45378 | 4.42015 | 4.10296 | 3.69461 | 2.26529 | 5.30135 | 4.18908 | 297 | l | - | - | - |
|     | 2.68618 | 4.42225 | 2.77519 | 2.73123 | 3.46354 | 2.40513 | 3.72494 | 3.29354 | 2.67741 | 2.69355 | 4.24690 | 2.90347 | 2.73739 | 3.18146 | 2.89801 | 2.37887 | 2.77519 | 2.98518 | 4.58477 | 3.61503 |     |   |   |   |   |
|     | 0.02290 | 4.18373 | 4.90608 | 0.61958 | 0.77255 | 0.48576 | 0.95510 |         |         |         |         |         |         |         |         |         |         |         |         |         |     |   |   |   |   |
| 265 | 3.17358 | 5.14304 | 3.15325 | 2.92559 | 4.35195 | 3.60187 | 4.08213 | 4.04395 | 2.72706 | 3.51336 | 4.54452 | 3.38355 | 4.16743 | 0.76699 | 2.99970 | 3.21374 | 3.47600 | 3.75749 | 5.57252 | 4.29319 | 298 | q | - | - | - |
|     | 2.68618 | 4.42225 | 2.77519 | 2.73123 | 3.46354 | 2.40513 | 3.72494 | 3.29354 | 2.67741 | 2.69355 | 4.24690 | 2.90347 | 2.73739 | 3.18146 | 2.89801 | 2.37887 | 2.77519 | 2.98518 | 4.58477 | 3.61503 |     |   |   |   |   |
|     | 0.02290 | 4.18373 | 4.90608 | 0.61958 | 0.77255 | 0.48576 | 0.95510 |         |         |         |         |         |         |         |         |         |         |         |         |         |     |   |   |   |   |
| 266 | 1.60334 | 4.82087 | 2.91900 | 2.25377 | 4.16936 | 3.40708 | 3.74595 | 3.55194 | 2.31876 | 3.18082 | 4.01491 | 3.01430 | 3.87729 | 2.91336 | 2.94826 | 2.72044 | 2.66253 | 3.22103 | 5.42849 | 4.10919 | 299 | a | - | - | - |
|     | 2.68618 | 4.42225 | 2.77519 | 2.73123 | 3.46354 | 2.40513 | 3.72494 | 3.29354 | 2.67741 | 2.69355 | 4.24690 | 2.90347 | 2.73739 | 3.18146 | 2.89801 | 2.37887 | 2.77519 | 2.98518 | 4.58477 | 3.61503 |     |   |   |   |   |
|     | 0.02290 | 4.18373 | 4.90608 | 0.61958 | 0.77255 | 0.48576 | 0.95510 |         |         |         |         |         |         |         |         |         |         |         |         |         |     |   |   |   |   |
| 267 | 2.33055 | 4.28549 | 3.46653 | 3.21421 | 4.46627 | 1.22126 | 4.32859 | 3.88052 | 3.31033 | 3.56891 | 4.38906 | 3.38457 | 3.79482 | 3.59451 | 3.62769 | 2.26464 | 1.99282 | 3.31214 | 5.79765 | 4.58345 | 300 | g | - | - | - |
|     | 2.68618 | 4.42225 | 2.77519 | 2.73123 | 3.46354 | 2.40513 | 3.72494 | 3.29354 | 2.67741 | 2.69355 | 4.24690 | 2.90347 | 2.73739 | 3.18146 | 2.89801 | 2.37887 | 2.77519 | 2.98518 | 4.58477 | 3.61503 |     |   |   |   |   |
|     | 0.02290 | 4.18373 | 4.90608 | 0.61958 | 0.77255 | 0.48576 | 0.95510 |         |         |         |         |         |         |         |         |         |         |         |         |         |     |   |   |   |   |
| 268 | 2.61363 | 4.51347 | 3.07161 | 2.68904 | 3.22963 | 3.51919 | 3.74592 | 3.05815 | 2.40977 | 1.97017 | 3.60716 | 3.04577 | 3.90518 | 2.98621 | 2.79849 | 2.75026 | 2.61681 | 2.80476 | 5.06567 | 3.79679 | 301 | l | - | - | - |
|     | 2.68618 | 4.42225 | 2.77519 | 2.73123 | 3.46354 | 2.40513 | 3.72494 | 3.29354 | 2.67741 | 2.69355 | 4.24690 | 2.90347 | 2.73739 | 3.18146 | 2.89801 | 2.37887 | 2.77519 | 2.98518 | 4.58477 | 3.61503 |     |   |   |   |   |
|     | 0.02290 | 4.18373 | 4.90608 | 0.61958 | 0.77255 | 0.48576 | 0.95510 |         |         |         |         |         |         |         |         |         |         |         |         |         |     |   |   |   |   |
| 269 | 2.60471 | 4.31349 | 2.93353 | 2.93118 | 3.21994 | 3.58901 | 3.84193 | 2.71383 | 2.88320 | 2.15598 | 2.76193 | 3.33232 | 3.96685 | 2.79293 | 3.23209 | 2.83531 | 2.83632 | 2.39853 | 4.89059 | 3.10453 | 302 | l | - | - | - |
|     | 2.68618 | 4.42225 | 2.77519 | 2.73123 | 3.46354 | 2.40513 | 3.72494 | 3.29354 | 2.67741 | 2.69355 | 4.24690 | 2.90347 | 2.73739 | 3.18146 | 2.89801 | 2.37887 | 2.77519 | 2.98518 | 4.58477 | 3.61503 |     |   |   |   |   |
|     | 0.02290 | 4.18373 | 4.90608 | 0.61958 | 0.77255 | 0.48576 | 0.95510 |         |         |         |         |         |         |         |         |         |         |         |         |         |     |   |   |   |   |
| 270 | 2.68505 | 5.03131 | 2.72166 | 2.41567 | 4.33524 | 3.26449 | 3.62011 | 3.77543 | 2.12022 | 3.30489 | 4.09092 | 2.94186 | 3.84508 | 2.59893 | 1.89183 | 2.67428 | 2.91020 | 3.40334 | 5.47098 | 3.33731 | 303 | r | - | - | - |
|     | 2.68618 | 4.42225 | 2.77519 | 2.73123 | 3.46354 | 2.40513 | 3.72494 | 3.29354 | 2.67741 | 2.69355 | 4.24690 | 2.90347 | 2.73739 | 3.18146 | 2.89801 | 2.37887 | 2.77519 | 2.98518 | 4.58477 | 3.61503 |     |   |   |   |   |
|     | 0.25478 | 4.18373 | 1.56221 | 0.61958 | 0.77255 | 0.48576 | 0.95510 |         |         |         |         |         |         |         |         |         |         |         |         |         |     |   |   |   |   |
| 271 | 2.26747 | 4.39542 | 3.04859 | 2.68658 | 4.17203 | 2.05631 | 3.88572 | 3.58877 | 2.77097 | 3.22874 | 4.05102 | 2.79562 | 2.77955 | 3.08857 | 3.17739 | 2.48384 | 2.28866 | 3.14928 | 5.47263 | 4.19195 | 304 | g | - | - | - |
|     | 2.68618 | 4.42225 | 2.77519 | 2.73123 | 3.46354 | 2.40513 | 3.72494 | 3.29354 | 2.67741 | 2.69355 | 4.24690 | 2.90347 | 2.73739 | 3.18146 | 2.89801 | 2.37887 | 2.77519 | 2.98518 | 4.58477 | 3.61503 |     |   |   |   |   |
|     | 0.02879 | 3.95775 | 4.68009 | 0.61958 | 0.77255 | 0.36715 | 1.17996 |         |         |         |         |         |         |         |         |         |         |         |         |         |     |   |   |   |   |
| 272 | 2.91470 | 4.34249 | 4.38203 | 3.81236 | 3.28543 | 4.07969 | 4.41369 | 1.35862 | 3.68116 | 1.77582 | 2.71955 | 4.05463 | 3.45603 | 3.90971 | 3.87109 | 3.38822 | 3.15043 | 2.11689 | 5.02978 | 3.86572 | 305 | i | - | - | - |
|     | 2.68618 | 4.42225 | 2.77519 | 2.73123 | 3.46354 | 2.40513 | 3.72494 | 3.29354 | 2.67741 | 2.69355 | 4.24690 | 2.90347 | 2.73739 | 3.18146 | 2.89801 | 2.37887 | 2.77519 | 2.98518 | 4.58477 | 3.61503 |     |   |   |   |   |
|     | 0.02290 | 4.18373 | 4.90608 | 0.61958 | 0.77255 | 0.48576 | 0.95510 |         |         |         |         |         |         |         |         |         |         |         |         |         |     |   |   |   |   |
| 273 | 2.64609 | 5.04816 | 2.58512 | 2.22425 | 4.35241 | 3.40601 | 3.61154 | 3.80790 | 1.94958 | 2.85632 | 4.10362 | 2.77535 | 3.81174 | 2.56996 | 2.83302 | 2.62622 | 2.49808 | 3.41726 | 5.50193 | 4.11974 | 306 | k | - | - | - |
|     | 2.68618 | 4.42225 | 2.77519 | 2.73123 | 3.46354 | 2.40513 | 3.72494 | 3.29354 | 2.67741 | 2.69355 | 4.24690 | 2.90347 | 2.73739 | 3.18146 | 2.89801 | 2.37887 | 2.77519 | 2.98518 | 4.58477 | 3.61503 |     |   |   |   |   |
|     | 0.02290 | 4.18373 | 4.90608 | 0.61958 | 0.77255 | 0.48576 | 0.95510 |         |         |         |         |         |         |         |         |         |         |         |         |         |     |   |   |   |   |
| 274 | 2.38098 | 4.45273 | 3.32835 | 2.79865 | 3.74718 | 3.42987 | 3.83713 | 3.12083 | 2.74104 | 2.57155 | 3.68554 | 3.21653 | 1.92472 | 3.08939 | 3.12154 | 2.47264 | 2.75493 | 2.84468 | 4.71318 | 3.87470 | 307 | p | - | - | - |
|     | 2.68618 | 4.42225 | 2.77519 | 2.73123 | 3.46354 | 2.40513 | 3.72494 | 3.29354 | 2.67741 | 2.69355 | 4.24690 | 2.90347 | 2.73739 | 3.18146 | 2.89801 | 2.37887 | 2.77519 | 2.98518 | 4.58477 | 3.61503 |     |   |   |   |   |
|     | 0.02290 | 4.18373 | 4.90608 | 0.61958 | 0.77255 | 0.48576 | 0.95510 |         |         |         |         |         |         |         |         |         |         |         |         |         |     |   |   |   |   |
| 275 | 2.80424 | 4.29988 | 4.09588 | 3.52113 | 3.25088 | 3.89612 | 4.16500 | 1.87580 | 2.93176 | 1.43492 | 3.20842 | 3.79940 | 4.24078 | 3.63922 | 3.55196 | 3.18960 | 3.03448 | 2.29796 | 4.89077 | 3.47377 | 308 | l | - | - | - |
|     | 2.68618 | 4.42225 | 2.77519 | 2.73123 | 3.46354 | 2.40513 | 3.72494 | 3.29354 | 2.67741 | 2.69355 | 4.24690 | 2.90347 | 2.73739 | 3.18146 | 2.89801 | 2.37887 | 2.77519 | 2.98518 | 4.58477 | 3.61503 |     |   |   |   |   |
|     | 0.02290 | 4.18373 | 4.90608 | 0.61958 | 0.77255 | 0.48576 | 0.95510 |         |         |         |         |         |         |         |         |         |         |         |         |         |     |   |   |   |   |
| 276 | 2.54099 | 4.97622 | 2.81843 | 1.94962 | 4.26666 | 3.40400 | 3.63429 | 3.55765 | 2.41251 | 3.26448 | 4.05144 | 2.82239 | 2.53023 | 2.66081 | 2.89065 | 2.51188 | 2.81909 | 3.25377 | 5.46164 | 4.09138 | 309 | e | - | - | - |
|     | 2.68618 | 4.42225 | 2.77519 | 2.73123 | 3.46354 | 2.40513 | 3.72494 | 3.29354 | 2.67741 | 2.69355 | 4.24690 | 2.90347 | 2.73739 | 3.18146 | 2.89801 | 2.37887 | 2.77519 | 2.98518 | 4.58477 | 3.61503 |     |   |   |   |   |
|     | 0.02290 | 4.18373 | 4.90608 | 0.61958 | 0.77255 | 0.48576 | 0.95510 |         |         |         |         |         |         |         |         |         |         |         |         |         |     |   |   |   |   |
| 277 | 2.34547 | 4.52672 | 3.22178 | 2.54977 | 3.70235 | 3.50627 | 3.73571 | 2.98058 | 2.54397 | 2.65974 | 2.86765 | 2.97935 | 3.08744 | 2.96709 | 3.04888 | 2.73069 | 2.45062 | 2.72411 | 5.08113 | 3.80721 | 310 | a | - | - | - |
|     | 2.68618 | 4.42225 | 2.77519 | 2.73123 | 3.46354 | 2.40513 | 3.72494 | 3.29354 | 2.67741 | 2.69355 | 4.24690 | 2.90347 | 2.73739 | 3.18146 | 2.89801 | 2.37887 | 2.77519 | 2.98518 | 4.58477 | 3.61503 |     |   |   |   |   |
|     | 0.02290 | 4.18373 | 4.90608 | 0.61958 | 0.77255 | 0.48576 | 0.95510 |         |         |         |         |         |         |         |         |         |         |         |         |         |     |   |   |   |   |
| 278 | 2.62514 | 5.14309 | 2.56164 | 1.81572 | 4.45369 | 3.38212 | 3.64310 | 3.92246 | 2.37269 | 3.43437 | 4.20601 | 2.85830 | 2.66908 | 2.48652 | 2.92244 | 2.65954 | 2.69258 | 3.51743 | 5.59614 | 4.19173 | 311 | e | - | - | - |
|     | 2.68628 | 4.42242 | 2.77529 | 2.73127 | 3.46343 | 2.40487 | 3.72512 | 3.29371 | 2.67758 | 2.69372 | 4.24707 | 2.90337 | 2.73743 | 3.18164 | 2.89818 | 2.37895 | 2.77502 | 2.98455 | 4.58494 | 3.61472 |     |   |   |   |   |
|     | 0.31824 | 1.32738 | 4.90608 | 1.19659 | 0.35986 | 0.48576 | 0.95510 |         |         |         |         |         |         |         |         |         |         |         |         |         |     |   |   |   |   |
| 279 | 2.20658 | 4.99316 | 2.89100 | 2.23474 | 4.28511 | 3.41142 | 3.23350 | 3.73118 | 2.18889 | 3.27509 | 4.05542 | 2.80334 | 2.89742 | 2.67887 | 2.84563 | 2.45231 | 2.86865 | 3.29957 | 5.46140 | 4.09010 | 318 | k | - |   |   |











|     |         |         |         |         |         |         |         |         |         |         |         |         |         |         |           |         |         |         |         |         |     |   |   |   |   |
|-----|---------|---------|---------|---------|---------|---------|---------|---------|---------|---------|---------|---------|---------|---------|-----------|---------|---------|---------|---------|---------|-----|---|---|---|---|
| 396 | 2.41895 | 5.05944 | 2.37085 | 2.07841 | 4.38623 | 3.37472 | 3.66091 | 3.84341 | 2.46246 | 3.38018 | 4.16172 | 2.87902 | 2.54055 | 2.78716 | 2.95798   | 2.51271 | 2.56569 | 3.45089 | 5.56191 | 4.17028 | 437 | e | - | - | - |
|     | 2.68618 | 4.42225 | 2.77519 | 2.73123 | 3.46354 | 2.40513 | 3.72494 | 3.29354 | 2.67741 | 2.69355 | 4.24690 | 2.90347 | 2.73739 | 3.18146 | 2.89801   | 2.37887 | 2.77519 | 2.98518 | 4.58477 | 3.61503 |     |   |   |   |   |
|     | 0.02290 | 4.18373 | 4.90608 | 0.61958 | 0.77255 | 0.48576 | 0.95510 |         |         |         |         |         |         |         |           |         |         |         |         |         |     |   |   |   |   |
| 397 | 2.35268 | 5.03124 | 2.36691 | 2.12392 | 4.33427 | 3.32389 | 3.63041 | 3.78853 | 2.41158 | 3.32599 | 4.10309 | 2.80869 | 3.81321 | 2.68327 | 2.90092   | 2.20013 | 2.78777 | 3.07117 | 5.50821 | 4.12312 | 438 | e | - | - | - |
|     | 2.68619 | 4.42226 | 2.77520 | 2.73124 | 3.46355 | 2.40513 | 3.72495 | 3.29355 | 2.67741 | 2.69356 | 4.24630 | 2.90347 | 2.73740 | 3.18147 | 2.89801   | 2.37887 | 2.77520 | 2.98519 | 4.58478 | 3.61504 |     |   |   |   |   |
|     | 0.02734 | 2.77449 | 4.90608 | 0.43961 | 1.03364 | 0.48576 | 0.95510 |         |         |         |         |         |         |         |           |         |         |         |         |         |     |   |   |   |   |
| 398 | 2.78915 | 4.78555 | 3.03573 | 2.86082 | 4.55438 | 0.94820 | 4.13419 | 4.02776 | 2.43496 | 3.64759 | 4.52814 | 3.27559 | 3.99189 | 3.36165 | 3.25077   | 2.88368 | 3.18476 | 3.59171 | 5.74491 | 4.51670 | 440 | g | - | - | - |
|     | 2.68618 | 4.42225 | 2.77519 | 2.73123 | 3.46354 | 2.40513 | 3.72494 | 3.29354 | 2.67741 | 2.69355 | 4.24690 | 2.90347 | 2.73739 | 3.18146 | 2.89801   | 2.37887 | 2.77519 | 2.98518 | 4.58477 | 3.61503 |     |   |   |   |   |
|     | 0.02290 | 4.18373 | 4.90608 | 0.61958 | 0.77255 | 0.48576 | 0.95510 |         |         |         |         |         |         |         |           |         |         |         |         |         |     |   |   |   |   |
| 399 | 2.49137 | 5.03709 | 2.88544 | 2.27206 | 4.35020 | 3.16802 | 3.61546 | 3.80152 | 2.07762 | 3.32746 | 4.10152 | 2.27629 | 3.81846 | 2.73229 | 2.59929   | 2.57504 | 2.57078 | 3.41357 | 5.49607 | 4.12190 | 441 | k | - | - | - |
|     | 2.68618 | 4.42225 | 2.77519 | 2.73123 | 3.46354 | 2.40513 | 3.72494 | 3.29354 | 2.67741 | 2.69355 | 4.24690 | 2.90347 | 2.73739 | 3.18146 | 2.89801   | 2.37887 | 2.77519 | 2.98518 | 4.58477 | 3.61503 |     |   |   |   |   |
|     | 0.02290 | 4.18373 | 4.90608 | 0.61958 | 0.77255 | 0.48576 | 0.95510 |         |         |         |         |         |         |         |           |         |         |         |         |         |     |   |   |   |   |
| 400 | 3.18265 | 5.20389 | 3.48914 | 2.72793 | 4.64391 | 3.72888 | 3.80670 | 4.03853 | 2.11371 | 3.51709 | 4.42682 | 3.35238 | 4.15800 | 2.96473 | 0.90586   | 3.20109 | 3.38247 | 3.73247 | 5.55689 | 4.39391 | 442 | r | - | - | - |
|     | 2.68618 | 4.42225 | 2.77519 | 2.73123 | 3.46354 | 2.40513 | 3.72494 | 3.29354 | 2.67741 | 2.69355 | 4.24690 | 2.90347 | 2.73739 | 3.18146 | 2.89801   | 2.37887 | 2.77519 | 2.98518 | 4.58477 | 3.61503 |     |   |   |   |   |
|     | 0.02290 | 4.18373 | 4.90608 | 0.61958 | 0.77255 | 0.48576 | 0.95510 |         |         |         |         |         |         |         |           |         |         |         |         |         |     |   |   |   |   |
| 401 | 2.67830 | 4.59462 | 3.26468 | 2.71812 | 2.99004 | 3.56147 | 3.71235 | 3.00078 | 2.67225 | 2.79699 | 3.68594 | 2.84904 | 3.94707 | 2.02737 | 3.07360   | 2.79514 | 2.90929 | 2.89855 | 4.86952 | 2.58438 | 443 | q | - | - | - |
|     | 2.68618 | 4.42225 | 2.77519 | 2.73123 | 3.46354 | 2.40513 | 3.72494 | 3.29354 | 2.67741 | 2.69355 | 4.24690 | 2.90347 | 2.73739 | 3.18146 | 2.89801   | 2.37887 | 2.77519 | 2.98518 | 4.58477 | 3.61503 |     |   |   |   |   |
|     | 0.02290 | 4.18373 | 4.90608 | 0.61958 | 0.77255 | 0.48576 | 0.95510 |         |         |         |         |         |         |         |           |         |         |         |         |         |     |   |   |   |   |
| 402 | 2.37578 | 4.18169 | 3.90219 | 3.18263 | 3.29871 | 3.72450 | 4.02508 | 1.78939 | 3.23500 | 2.23764 | 2.72345 | 3.62048 | 3.43171 | 3.49610 | 3.48638   | 3.00222 | 2.88289 | 2.18950 | 4.82395 | 3.62206 | 444 | i | - | - | - |
|     | 2.68618 | 4.42225 | 2.77519 | 2.73123 | 3.46354 | 2.40513 | 3.72494 | 3.29354 | 2.67741 | 2.69355 | 4.24690 | 2.90347 | 2.73739 | 3.18146 | 2.89801   | 2.37887 | 2.77519 | 2.98518 | 4.58477 | 3.61503 |     |   |   |   |   |
|     | 0.02290 | 4.18373 | 4.90608 | 0.61958 | 0.77255 | 0.48576 | 0.95510 |         |         |         |         |         |         |         |           |         |         |         |         |         |     |   |   |   |   |
| 403 | 2.40235 | 4.13416 | 3.90754 | 3.32986 | 3.25349 | 3.68408 | 3.98590 | 2.20239 | 3.23381 | 2.32092 | 3.05756 | 3.60197 | 4.05848 | 3.48358 | 3.46981   | 2.57201 | 2.69848 | 1.88021 | 4.75922 | 3.01719 | 445 | v | - | - | - |
|     | 2.68618 | 4.42225 | 2.77519 | 2.73123 | 3.46354 | 2.40513 | 3.72494 | 3.29354 | 2.67741 | 2.69355 | 4.24690 | 2.90347 | 2.73739 | 3.18146 | 2.89801   | 2.37887 | 2.77519 | 2.98518 | 4.58477 | 3.61503 |     |   |   |   |   |
|     | 0.02290 | 4.18373 | 4.90608 | 0.61958 | 0.77255 | 0.48576 | 0.95510 |         |         |         |         |         |         |         |           |         |         |         |         |         |     |   |   |   |   |
| 404 | 2.25772 | 4.83996 | 2.97590 | 2.04062 | 4.09912 | 3.42804 | 3.64698 | 3.51928 | 2.43907 | 3.11432 | 3.31661 | 2.96047 | 3.58783 | 2.62923 | 2.90214   | 2.38026 | 2.65019 | 3.18621 | 5.34903 | 4.00844 | 446 | e | - | - | - |
|     | 2.68618 | 4.42225 | 2.77519 | 2.73123 | 3.46354 | 2.40513 | 3.72494 | 3.29354 | 2.67741 | 2.69355 | 4.24690 | 2.90347 | 2.73739 | 3.18146 | 2.89801   | 2.37887 | 2.77519 | 2.98518 | 4.58477 | 3.61503 |     |   |   |   |   |
|     | 0.02290 | 4.18373 | 4.90608 | 0.61958 | 0.77255 | 0.48576 | 0.95510 |         |         |         |         |         |         |         |           |         |         |         |         |         |     |   |   |   |   |
| 405 | 3.14774 | 4.45479 | 4.92175 | 4.42461 | 3.70261 | 4.51378 | 5.12390 | 1.05290 | 4.31657 | 2.22755 | 3.49854 | 4.61964 | 4.83404 | 4.57988 | 4.50634   | 3.90172 | 3.18480 | 1.31564 | 5.64411 | 4.44379 | 447 | i | - | - | - |
|     | 2.68588 | 4.42227 | 2.77522 | 2.73125 | 3.46356 | 2.40515 | 3.72497 | 3.29356 | 2.67743 | 2.69357 | 4.24692 | 2.90349 | 2.73742 | 3.18148 | 2.89803   | 2.37889 | 2.77522 | 2.98520 | 4.58479 | 3.61505 |     |   |   |   |   |
|     | 0.15442 | 1.99738 | 4.90608 | 0.30389 | 1.33918 | 0.48576 | 0.95510 |         |         |         |         |         |         |         |           |         |         |         |         |         |     |   |   |   |   |
| 406 | 2.74101 | 5.05073 | 1.57645 | 2.35620 | 4.61510 | 2.08577 | 3.84409 | 4.08856 | 2.76750 | 3.63826 | 4.44758 | 2.89152 | 3.86506 | 3.00236 | 3.29095   | 2.44186 | 2.76800 | 3.63938 | 5.82231 | 4.41135 | 449 | d | - | - | - |
|     | 2.68618 | 4.42225 | 2.77519 | 2.73123 | 3.46354 | 2.40513 | 3.72494 | 3.29354 | 2.67741 | 2.69355 | 4.24690 | 2.90347 | 2.73739 | 3.18146 | 2.89801   | 2.37887 | 2.77519 | 2.98518 | 4.58477 | 3.61503 |     |   |   |   |   |
|     | 0.02290 | 4.18373 | 4.90608 | 0.61958 | 0.77255 | 0.48576 | 0.95510 |         |         |         |         |         |         |         |           |         |         |         |         |         |     |   |   |   |   |
| 407 | 1.81348 | 4.65443 | 3.01267 | 2.62648 | 4.27156 | 2.14997 | 3.86049 | 3.69694 | 2.69248 | 3.30815 | 4.12531 | 3.07591 | 3.83525 | 2.31318 | 3.11850   | 2.44426 | 2.88948 | 3.28936 | 5.53674 | 4.22552 | 450 | a | - | - | - |
|     | 2.68618 | 4.42225 | 2.77519 | 2.73123 | 3.46354 | 2.40513 | 3.72494 | 3.29354 | 2.67741 | 2.69355 | 4.24690 | 2.90347 | 2.73739 | 3.18146 | 2.89801   | 2.37887 | 2.77519 | 2.98518 | 4.58477 | 3.61503 |     |   |   |   |   |
|     | 0.02290 | 4.18373 | 4.90608 | 0.61958 | 0.77255 | 0.48576 | 0.95510 |         |         |         |         |         |         |         |           |         |         |         |         |         |     |   |   |   |   |
| 408 | 2.29070 | 4.33383 | 3.61005 | 3.07447 | 3.01280 | 3.57768 | 3.97299 | 2.41129 | 3.01941 | 2.48554 | 3.46744 | 3.43675 | 1.98521 | 3.32252 | 3.35203   | 2.87079 | 2.89563 | 2.51798 | 4.99442 | 3.74678 | 451 | p | - | - | - |
|     | 2.68618 | 4.42225 | 2.77519 | 2.73123 | 3.46354 | 2.40513 | 3.72494 | 3.29354 | 2.67741 | 2.69355 | 4.24690 | 2.90347 | 2.73739 | 3.18146 | 2.89801   | 2.37887 | 2.77519 | 2.98518 | 4.58477 | 3.61503 |     |   |   |   |   |
|     | 0.02290 | 4.18373 | 4.90608 | 0.61958 | 0.77255 | 0.48576 | 0.95510 |         |         |         |         |         |         |         |           |         |         |         |         |         |     |   |   |   |   |
| 409 | 3.18407 | 4.53198 | 4.80864 | 4.30960 | 3.46547 | 4.44241 | 4.94945 | 1.95174 | 4.15641 | 1.47957 | 3.30674 | 4.52439 | 4.76169 | 4.40587 | 4.33038   | 3.82947 | 3.44910 | 1.08794 | 5.42835 | 4.23412 | 452 | v | - | - | - |
|     | 2.68618 | 4.42225 | 2.77519 | 2.73123 | 3.46354 | 2.40513 | 3.72494 | 3.29354 | 2.67741 | 2.69355 | 4.24690 | 2.90347 | 2.73739 | 3.18146 | 2.89801   | 2.37887 | 2.77519 | 2.98518 | 4.58477 | 3.61503 |     |   |   |   |   |
|     | 0.02290 | 4.18373 | 4.90608 | 0.61958 | 0.77255 | 0.48576 | 0.95510 |         |         |         |         |         |         |         |           |         |         |         |         |         |     |   |   |   |   |
| 410 | 3.22903 | 4.52517 | 4.99807 | 4.52296 | 3.64476 | 4.59678 | 5.22264 | 0.91817 | 4.40013 | 2.10693 | 3.44181 | 4.72065 | 4.90437 | 4.65941 | 4.57936   | 4.00742 | 3.50044 | 1.48786 | 5.66898 | 4.46663 | 453 | i | - | - | - |
|     | 2.68618 | 4.42225 | 2.77519 | 2.73123 | 3.46354 | 2.40513 | 3.72494 | 3.29354 | 2.67741 | 2.69355 | 4.24690 | 2.90347 | 2.73739 | 3.18146 | 2.89801   | 2.37887 | 2.77519 | 2.98518 | 4.58477 | 3.61503 |     |   |   |   |   |
|     | 0.02290 | 4.18373 | 4.90608 | 0.61958 | 0.77255 | 0.48576 | 0.95510 |         |         |         |         |         |         |         |           |         |         |         |         |         |     |   |   |   |   |
| 411 | 3.22031 | 4.91301 | 3.86274 | 3.75476 | 4.70463 | 3.58351 | 4.79631 | 4.34360 | 3.84144 | 3.93066 | 5.00116 | 4.02490 | 0.41006 | 4.22005 | 4.04145   | 3.39999 | 3.68818 | 3.95083 | 5.79302 | 4.83303 | 454 | p | - | - | - |
|     | 2.68618 | 4.42225 | 2.77519 | 2.73123 | 3.46354 | 2.40513 | 3.72494 | 3.29354 | 2.67741 | 2.69355 | 4.24690 | 2.90347 | 2.73739 | 3.18146 | 2.89801   | 2.37887 | 2.77519 | 2.98518 | 4.58477 | 3.61503 |     |   |   |   |   |
|     | 0.02290 | 4.18373 | 4.90608 | 0.61958 | 0.77255 | 0.48576 | 0.95510 |         |         |         |         |         |         |         |           |         |         |         |         |         |     |   |   |   |   |
| 412 | 2.64663 | 4.85570 | 3.02635 | 2.42117 | 4.13697 | 3.44894 | 3.65562 | 3.54896 | 1.91337 | 3.13919 | 3.95169 | 2.99065 | 3.85059 | 2.80141 | 2.71901   | 2.24318 | 2.40931 | 2.90012 | 5.36305 | 4.03672 | 455 | k | - | - | - |
|     | 2.68618 | 4.42225 | 2.77519 | 2.73123 | 3.46354 | 2.40513 | 3.72494 | 3.29354 | 2.67741 | 2.69355 | 4.24690 | 2.90347 | 2.73739 | 3.18146 | 2.89801   | 2.37887 | 2.77519 | 2.98518 | 4.58477 | 3.61503 |     |   |   |   |   |
|     | 0.02290 | 4.18373 | 4.90608 | 0.61958 | 0.77255 | 0.48576 | 0.95510 |         |         |         |         |         |         |         |           |         |         |         |         |         |     |   |   |   |   |
| 413 | 3.68410 | 4.99736 | 4.66912 | 4.45276 | 0.61317 | 4.27914 | 4.05653 | 3.18184 | 4.35515 | 2.48406 | 3.87144 | 4.38573 | 4.73817 | 4.43916 | 4.39718</ |         |         |         |         |         |     |   |   |   |   |

CONS yes  
 CS no  
 MAP yes  
 DATE Tue Jan 2 10:16:23 2018  
 NSEQ 33  
 EFFN 0.954712  
 CKSUM 989184870  
 STATS LOCAL MSV -11.4998 0.69901  
 STATS LOCAL VITERBI -12.2907 0.69901  
 STATS LOCAL FORWARD -6.0573 0.69901

| HMM   | A       | C       | D       | E       | F       | G       | H       | I       | K       | L       | M       | N       | P       | Q       | R       | S       | T       | V       | W       | Y       |
|-------|---------|---------|---------|---------|---------|---------|---------|---------|---------|---------|---------|---------|---------|---------|---------|---------|---------|---------|---------|---------|
|       | m->m    | m->i    | m->d    | i->m    | i->i    | d->m    | d->d    |         |         |         |         |         |         |         |         |         |         |         |         |         |
| COMPO | 2.53589 | 4.57913 | 3.04421 | 2.74772 | 3.19902 | 2.80752 | 3.83449 | 2.73088 | 2.75551 | 2.45141 | 3.55085 | 3.12427 | 3.22409 | 3.13744 | 2.98003 | 2.72534 | 2.79067 | 2.50991 | 4.15916 | 3.48310 |
|       | 2.68613 | 4.42239 | 2.77534 | 2.73132 | 3.46340 | 2.40527 | 3.72509 | 3.29353 | 2.67713 | 2.69358 | 4.24590 | 2.90345 | 2.73754 | 3.18147 | 2.89789 | 2.37892 | 2.77518 | 2.98504 | 4.58491 | 3.61517 |
|       | 0.38717 | 1.98344 | 1.69592 | 1.53347 | 0.24307 | 0.00000 | *       |         |         |         |         |         |         |         |         |         |         |         |         |         |
| 1     | 2.46449 | 4.27048 | 3.73987 | 3.18451 | 3.34605 | 3.68741 | 3.99901 | 2.22631 | 2.85361 | 2.20861 | 2.06966 | 3.52910 | 4.07075 | 3.37708 | 3.31756 | 2.97634 | 2.90994 | 2.28635 | 4.91962 | 3.71320 |
|       | 2.68618 | 4.42225 | 2.77519 | 2.73123 | 3.46354 | 2.40513 | 3.72494 | 3.29354 | 2.67741 | 2.69355 | 4.24690 | 2.90347 | 2.73739 | 3.18146 | 2.89801 | 2.37887 | 2.77519 | 2.98518 | 4.58477 | 3.61503 |
|       | 0.02840 | 3.97144 | 4.69378 | 0.61958 | 0.77255 | 0.68064 | 0.70581 |         |         |         |         |         |         |         |         |         |         |         |         |         |
| 2     | 2.79226 | 5.09971 | 2.69333 | 2.06535 | 4.45990 | 2.89507 | 3.64152 | 3.88211 | 1.57386 | 3.40325 | 4.22835 | 2.89123 | 3.85546 | 2.78327 | 2.64093 | 2.76534 | 3.03033 | 3.51539 | 5.54711 | 4.21754 |
|       | 2.68618 | 4.42225 | 2.77519 | 2.73123 | 3.46354 | 2.40513 | 3.72494 | 3.29354 | 2.67741 | 2.69355 | 4.24690 | 2.90347 | 2.73739 | 3.18146 | 2.89801 | 2.37887 | 2.77519 | 2.98518 | 4.58477 | 3.61503 |
|       | 0.02840 | 3.97144 | 4.69378 | 0.61958 | 0.77255 | 0.68064 | 0.70581 |         |         |         |         |         |         |         |         |         |         |         |         |         |
| 3     | 2.55430 | 4.31400 | 3.37006 | 2.80771 | 3.45445 | 3.50995 | 3.23814 | 2.50030 | 2.73740 | 2.20458 | 3.33537 | 3.02042 | 3.89508 | 3.06854 | 3.09493 | 2.64922 | 2.52808 | 2.58248 | 4.88859 | 3.64276 |
|       | 2.68618 | 4.42225 | 2.77519 | 2.73123 | 3.46354 | 2.40513 | 3.72494 | 3.29354 | 2.67741 | 2.69355 | 4.24690 | 2.90347 | 2.73739 | 3.18146 | 2.89801 | 2.37887 | 2.77519 | 2.98518 | 4.58477 | 3.61503 |
|       | 0.02840 | 3.97144 | 4.69378 | 0.61958 | 0.77255 | 0.68064 | 0.70581 |         |         |         |         |         |         |         |         |         |         |         |         |         |
| 4     | 2.38600 | 4.27259 | 3.45163 | 2.90772 | 3.46537 | 3.06644 | 3.83898 | 2.16812 | 2.84990 | 2.36872 | 3.42322 | 2.87364 | 3.92074 | 3.16661 | 3.19505 | 2.77882 | 2.80076 | 2.35044 | 4.92336 | 3.68720 |
|       | 2.68618 | 4.42225 | 2.77519 | 2.73123 | 3.46354 | 2.40513 | 3.72494 | 3.29354 | 2.67741 | 2.69355 | 4.24690 | 2.90347 | 2.73739 | 3.18146 | 2.89801 | 2.37887 | 2.77519 | 2.98518 | 4.58477 | 3.61503 |
|       | 0.02840 | 3.97144 | 4.69378 | 0.61958 | 0.77255 | 0.68064 | 0.70581 |         |         |         |         |         |         |         |         |         |         |         |         |         |
| 5     | 2.67449 | 4.85866 | 3.04287 | 2.38889 | 4.12125 | 3.46813 | 3.63738 | 3.52482 | 1.83111 | 3.11275 | 2.74701 | 2.69615 | 3.86012 | 2.78699 | 2.64527 | 2.70439 | 2.80457 | 3.20484 | 5.33306 | 4.02320 |
|       | 2.68618 | 4.42225 | 2.77519 | 2.73123 | 3.46354 | 2.40513 | 3.72494 | 3.29354 | 2.67741 | 2.69355 | 4.24690 | 2.90347 | 2.73739 | 3.18146 | 2.89801 | 2.37887 | 2.77519 | 2.98518 | 4.58477 | 3.61503 |
|       | 0.02464 | 4.11150 | 4.83384 | 0.61958 | 0.77255 | 0.44905 | 1.01676 |         |         |         |         |         |         |         |         |         |         |         |         |         |
| 6     | 2.51326 | 4.93290 | 2.34032 | 2.38275 | 4.20910 | 3.28652 | 3.60910 | 3.39468 | 2.10800 | 3.20752 | 3.46820 | 2.83311 | 3.80563 | 2.73489 | 2.61389 | 2.61274 | 2.84162 | 3.28605 | 5.40839 | 3.71129 |
|       | 2.68618 | 4.42225 | 2.77519 | 2.73123 | 3.46354 | 2.40513 | 3.72494 | 3.29354 | 2.67741 | 2.69355 | 4.24690 | 2.90347 | 2.73739 | 3.18146 | 2.89801 | 2.37887 | 2.77519 | 2.98518 | 4.58477 | 3.61503 |
|       | 0.02334 | 4.16489 | 4.88723 | 0.61958 | 0.77255 | 0.48576 | 0.95510 |         |         |         |         |         |         |         |         |         |         |         |         |         |
| 7     | 2.87933 | 5.16128 | 3.18722 | 2.59753 | 4.55565 | 3.57923 | 3.63769 | 3.95184 | 1.50445 | 3.42330 | 4.23662 | 2.96569 | 3.96047 | 2.63170 | 1.92858 | 2.41399 | 3.07872 | 3.59004 | 5.51877 | 4.25170 |
|       | 2.68618 | 4.42225 | 2.77519 | 2.73123 | 3.46354 | 2.40513 | 3.72494 | 3.29354 | 2.67741 | 2.69355 | 4.24690 | 2.90347 | 2.73739 | 3.18146 | 2.89801 | 2.37887 | 2.77519 | 2.98518 | 4.58477 | 3.61503 |
|       | 0.02334 | 4.16489 | 4.88723 | 0.61958 | 0.77255 | 0.48576 | 0.95510 |         |         |         |         |         |         |         |         |         |         |         |         |         |
| 8     | 2.60902 | 4.16767 | 4.23077 | 3.65618 | 3.17954 | 3.46150 | 4.22083 | 1.70370 | 3.54134 | 1.90023 | 3.26330 | 3.86891 | 4.23566 | 3.76904 | 3.72872 | 3.17570 | 2.77635 | 1.80027 | 4.88902 | 3.69627 |
|       | 2.68618 | 4.42225 | 2.77519 | 2.73123 | 3.46354 | 2.40513 | 3.72494 | 3.29354 | 2.67741 | 2.69355 | 4.24690 | 2.90347 | 2.73739 | 3.18146 | 2.89801 | 2.37887 | 2.77519 | 2.98518 | 4.58477 | 3.61503 |
|       | 0.02334 | 4.16489 | 4.88723 | 0.61958 | 0.77255 | 0.48576 | 0.95510 |         |         |         |         |         |         |         |         |         |         |         |         |         |
| 9     | 2.14975 | 4.41168 | 3.33585 | 2.77718 | 3.12374 | 2.89818 | 3.78445 | 2.94053 | 2.52982 | 2.53215 | 3.52388 | 3.03861 | 3.91688 | 3.06200 | 3.12674 | 2.76531 | 2.76038 | 2.35330 | 4.99435 | 3.74154 |
|       | 2.68618 | 4.42225 | 2.77519 | 2.73123 | 3.46354 | 2.40513 | 3.72494 | 3.29354 | 2.67741 | 2.69355 | 4.24690 | 2.90347 | 2.73739 | 3.18146 | 2.89801 | 2.37887 | 2.77519 | 2.98518 | 4.58477 | 3.61503 |
|       | 0.02334 | 4.16489 | 4.88723 | 0.61958 | 0.77255 | 0.48576 | 0.95510 |         |         |         |         |         |         |         |         |         |         |         |         |         |
| 10    | 2.80220 | 4.98532 | 3.21483 | 2.61256 | 3.71692 | 3.55977 | 3.65461 | 3.68740 | 1.44208 | 3.23466 | 4.06933 | 3.08906 | 3.94075 | 2.79586 | 2.09884 | 2.82121 | 2.83088 | 3.36441 | 5.40209 | 4.12315 |
|       | 2.68618 | 4.42225 | 2.77519 | 2.73123 | 3.46354 | 2.40513 | 3.72494 | 3.29354 | 2.67741 | 2.69355 | 4.24690 | 2.90347 | 2.73739 | 3.18146 | 2.89801 | 2.37887 | 2.77519 | 2.98518 | 4.58477 | 3.61503 |
|       | 0.02334 | 4.16489 | 4.88723 | 0.61958 | 0.77255 | 0.48576 | 0.95510 |         |         |         |         |         |         |         |         |         |         |         |         |         |
| 11    | 2.43243 | 4.13145 | 4.01396 | 3.43102 | 3.18484 | 3.72646 | 4.02093 | 2.31692 | 3.31463 | 1.61191 | 3.00242 | 3.67383 | 3.35469 | 3.55085 | 3.52034 | 3.01015 | 2.86757 | 2.34238 | 3.56639 | 3.53568 |
|       | 2.68618 | 4.42225 | 2.77519 | 2.73123 | 3.46354 | 2.40513 | 3.72494 | 3.29354 | 2.67741 | 2.69355 | 4.24690 | 2.90347 | 2.73739 | 3.18146 | 2.89801 | 2.37887 | 2.77519 | 2.98518 | 4.58477 | 3.61503 |
|       | 0.02334 | 4.16489 | 4.88723 | 0.61958 | 0.77255 | 0.48576 | 0.95510 |         |         |         |         |         |         |         |         |         |         |         |         |         |
| 12    | 2.21221 | 4.27111 | 3.54267 | 2.97773 | 3.42070 | 3.33394 | 3.85856 | 2.65343 | 2.91821 | 2.27054 | 3.39694 | 3.35631 | 3.95965 | 3.21719 | 3.25124 | 2.20640 | 2.68414 | 2.55350 | 3.46827 | 3.64830 |
|       | 2.68618 | 4.42225 | 2.77519 | 2.73123 | 3.46354 | 2.40513 | 3.72494 | 3.29354 | 2.67741 | 2.69355 | 4.24690 | 2.90347 | 2.73739 | 3.18146 | 2.89801 | 2.37887 | 2.77519 | 2.98518 | 4.58477 | 3.61503 |
|       | 0.05279 | 4.16489 | 3.32740 | 0.61958 | 0.77255 | 0.48576 | 0.95510 |         |         |         |         |         |         |         |         |         |         |         |         |         |
| 13    | 2.26622 | 4.14781 | 3.95389 | 3.37950 | 2.44355 | 3.25509 | 4.01108 | 2.50661 | 3.27704 | 1.82506 | 2.82986 | 3.64029 | 4.07916 | 3.52028 | 3.50208 | 2.99051 | 2.86717 | 2.33749 | 4.74920 | 3.54203 |
|       | 2.68618 | 4.42225 | 2.77519 | 2.73123 | 3.46354 | 2.40513 | 3.72494 | 3.29354 | 2.67741 | 2.69355 | 4.24690 | 2.90347 | 2.73739 | 3.18146 | 2.89801 | 2.37887 | 2.77519 | 2.98518 | 4.58477 | 3.61503 |
|       | 0.02403 | 4.13613 | 4.85848 | 0.61958 | 0.77255 | 0.51985 | 0.90291 |         |         |         |         |         |         |         |         |         |         |         |         |         |
| 14    | 2.56424 | 4.14370 | 4.11443 | 3.53585 | 2.97115 | 3.80002 | 4.11926 | 2.14604 | 3.42625 | 1.94429 | 3.10268 | 3.76702 | 4.16090 | 3.65595 | 3.62574 | 2.61718 | 2.91148 | 1.71065 | 4.81032 | 3.61680 |
|       | 2.68618 | 4.42225 | 2.77519 | 2.73123 | 3.46354 | 2.40513 | 3.72494 | 3.29354 | 2.67741 | 2.69355 | 4.24690 | 2.90347 | 2.73739 | 3.18146 | 2.89801 | 2.37887 | 2.77519 | 2.98518 | 4.58477 | 3.61503 |
|       | 0.02403 | 4.13613 | 4.85848 | 0.61958 | 0.77255 | 0.51985 | 0.90291 |         |         |         |         |         |         |         |         |         |         |         |         |         |
| 15    | 1.66713 | 4.33086 | 3.40994 | 2.96362 | 3.95285 | 2.16433 | 4.00940 | 3.30809 | 2.95380 | 2.45014 | 3.88371 | 3.28100 | 3.82807 | 3.27159 | 3.31542 | 2.32659 | 2.80159 | 2.95361 | 5.33608 | 4.09159 |
|       | 2.68618 | 4.42225 | 2.77519 | 2.73123 | 3.46354 | 2.40513 | 3.72494 | 3.29354 | 2.67741 | 2.69355 | 4.24690 | 2.90347 | 2.73739 | 3.18146 | 2.89801 | 2.37887 | 2.77519 | 2.98518 | 4.58477 | 3.61503 |
|       | 0.03948 | 4.13613 | 3.78410 | 0.61958 | 0.77255 | 0.46502 | 0.98919 |         |         |         |         |         |         |         |         |         |         |         |         |         |
| 16    | 2.59105 | 4.33175 | 4.43433 | 3.87552 | 3.38418 | 4.11421 | 4.50735 | 1.82660 | 3.76291 | 1.38793 | 3.25678 | 4.11261 | 4.44981 | 3.99473 | 3.96180 | 3.43400 | 2.94999 | 1.76713 | 5.13530 | 3.96516 |
|       | 2.68618 | 4.42225 | 2.77519 | 2.73123 | 3.46354 | 2.40513 | 3.72494 | 3.29354 | 2.67741 | 2.69355 | 4.24690 | 2.90347 | 2.73739 |         |         |         |         |         |         |         |





|    |         |         |         |         |         |         |         |         |         |         |         |         |         |         |         |         |         |         |         |         |    |   |   |   |   |
|----|---------|---------|---------|---------|---------|---------|---------|---------|---------|---------|---------|---------|---------|---------|---------|---------|---------|---------|---------|---------|----|---|---|---|---|
| 63 | 3.06603 | 5.67994 | 1.45983 | 1.26293 | 4.96494 | 3.30380 | 3.86529 | 4.50064 | 2.90511 | 3.98431 | 4.84165 | 2.76146 | 3.93686 | 3.03276 | 3.51937 | 2.93555 | 3.35815 | 4.05979 | 6.12735 | 4.60409 | 79 | e | - | - | - |
|    | 2.68618 | 4.42225 | 2.77519 | 2.73123 | 3.46354 | 2.40513 | 3.72494 | 3.29354 | 2.67741 | 2.69355 | 4.24690 | 2.90347 | 2.73739 | 3.18146 | 2.89801 | 2.37887 | 2.77519 | 2.98518 | 4.58477 | 3.61503 |    |   |   |   |   |
|    | 0.02334 | 4.16489 | 4.88723 | 0.61958 | 0.77255 | 0.48576 | 0.95510 |         |         |         |         |         |         |         |         |         |         |         |         |         |    |   |   |   |   |
| 64 | 2.78199 | 5.20545 | 2.22351 | 1.62470 | 4.52846 | 3.34560 | 3.72217 | 3.99039 | 2.58385 | 3.52614 | 4.32664 | 2.83710 | 3.85739 | 2.86180 | 3.10110 | 2.63443 | 2.10091 | 3.59244 | 5.70734 | 4.28786 | 80 | e | - | - | - |
|    | 2.68618 | 4.42225 | 2.77519 | 2.73123 | 3.46354 | 2.40513 | 3.72494 | 3.29354 | 2.67741 | 2.69355 | 4.24690 | 2.90347 | 2.73739 | 3.18146 | 2.89801 | 2.37887 | 2.77519 | 2.98518 | 4.58477 | 3.61503 |    |   |   |   |   |
|    | 0.02334 | 4.16489 | 4.88723 | 0.61958 | 0.77255 | 0.48576 | 0.95510 |         |         |         |         |         |         |         |         |         |         |         |         |         |    |   |   |   |   |
| 65 | 3.12009 | 4.48236 | 4.73820 | 4.16080 | 2.51753 | 4.32843 | 4.61566 | 2.25712 | 4.03145 | 1.50329 | 1.71486 | 4.35927 | 4.58192 | 4.15013 | 4.14488 | 3.65115 | 3.34466 | 1.90633 | 5.02118 | 3.88355 | 81 | l | - | - | - |
|    | 2.68618 | 4.42225 | 2.77519 | 2.73123 | 3.46354 | 2.40513 | 3.72494 | 3.29354 | 2.67741 | 2.69355 | 4.24690 | 2.90347 | 2.73739 | 3.18146 | 2.89801 | 2.37887 | 2.77519 | 2.98518 | 4.58477 | 3.61503 |    |   |   |   |   |
|    | 0.02334 | 4.16489 | 4.88723 | 0.61958 | 0.77255 | 0.48576 | 0.95510 |         |         |         |         |         |         |         |         |         |         |         |         |         |    |   |   |   |   |
| 66 | 2.60857 | 4.73151 | 2.77850 | 2.25299 | 3.96493 | 3.44272 | 3.67474 | 3.10759 | 2.50117 | 2.99337 | 3.82422 | 3.00417 | 3.84403 | 2.84410 | 2.95465 | 2.29859 | 2.36497 | 2.58664 | 5.26559 | 3.94694 | 82 | e | - | - | - |
|    | 2.68618 | 4.42225 | 2.77519 | 2.73123 | 3.46354 | 2.40513 | 3.72494 | 3.29354 | 2.67741 | 2.69355 | 4.24690 | 2.90347 | 2.73739 | 3.18146 | 2.89801 | 2.37887 | 2.77519 | 2.98518 | 4.58477 | 3.61503 |    |   |   |   |   |
|    | 0.02334 | 4.16489 | 4.88723 | 0.61958 | 0.77255 | 0.48576 | 0.95510 |         |         |         |         |         |         |         |         |         |         |         |         |         |    |   |   |   |   |
| 67 | 2.97719 | 3.04586 | 4.78274 | 4.22507 | 3.43739 | 4.27536 | 4.70443 | 1.49700 | 4.09570 | 1.73376 | 3.31132 | 4.36572 | 4.58771 | 4.28724 | 4.22007 | 3.61507 | 3.22136 | 1.47631 | 5.20728 | 4.02992 | 83 | v | - | - | - |
|    | 2.68618 | 4.42225 | 2.77519 | 2.73123 | 3.46354 | 2.40513 | 3.72494 | 3.29354 | 2.67741 | 2.69355 | 4.24690 | 2.90347 | 2.73739 | 3.18146 | 2.89801 | 2.37887 | 2.77519 | 2.98518 | 4.58477 | 3.61503 |    |   |   |   |   |
|    | 0.02334 | 4.16489 | 4.88723 | 0.61958 | 0.77255 | 0.48576 | 0.95510 |         |         |         |         |         |         |         |         |         |         |         |         |         |    |   |   |   |   |
| 68 | 2.42687 | 4.39428 | 3.32457 | 2.96479 | 4.22495 | 3.16449 | 4.08135 | 3.59914 | 2.86488 | 3.29319 | 4.13878 | 3.72221 | 3.82557 | 3.31594 | 3.31604 | 1.57098 | 1.60441 | 3.16801 | 5.55770 | 4.30501 | 84 | s | - | - | - |
|    | 2.68618 | 4.42225 | 2.77519 | 2.73123 | 3.46354 | 2.40513 | 3.72494 | 3.29354 | 2.67741 | 2.69355 | 4.24690 | 2.90347 | 2.73739 | 3.18146 | 2.89801 | 2.37887 | 2.77519 | 2.98518 | 4.58477 | 3.61503 |    |   |   |   |   |
|    | 0.02334 | 4.16489 | 4.88723 | 0.61958 | 0.77255 | 0.48576 | 0.95510 |         |         |         |         |         |         |         |         |         |         |         |         |         |    |   |   |   |   |
| 69 | 3.07087 | 4.80683 | 3.80366 | 3.74507 | 4.86220 | 0.39323 | 4.83738 | 4.54296 | 3.96555 | 4.15653 | 5.14181 | 3.96927 | 4.20642 | 4.26711 | 4.15990 | 3.25273 | 3.57468 | 4.01458 | 5.86989 | 4.97743 | 85 | G | - | - | - |
|    | 2.68618 | 4.42225 | 2.77519 | 2.73123 | 3.46354 | 2.40513 | 3.72494 | 3.29354 | 2.67741 | 2.69355 | 4.24690 | 2.90347 | 2.73739 | 3.18146 | 2.89801 | 2.37887 | 2.77519 | 2.98518 | 4.58477 | 3.61503 |    |   |   |   |   |
|    | 0.02334 | 4.16489 | 4.88723 | 0.61958 | 0.77255 | 0.48576 | 0.95510 |         |         |         |         |         |         |         |         |         |         |         |         |         |    |   |   |   |   |
| 70 | 3.26687 | 5.21885 | 3.46078 | 3.04013 | 4.67338 | 3.71239 | 3.95890 | 4.12415 | 0.69708 | 3.63003 | 4.58538 | 3.44777 | 4.19999 | 3.14070 | 2.53526 | 3.29544 | 3.50296 | 3.81902 | 5.61432 | 4.47465 | 86 | k | - | - | - |
|    | 2.68618 | 4.42225 | 2.77519 | 2.73123 | 3.46354 | 2.40513 | 3.72494 | 3.29354 | 2.67741 | 2.69355 | 4.24690 | 2.90347 | 2.73739 | 3.18146 | 2.89801 | 2.37887 | 2.77519 | 2.98518 | 4.58477 | 3.61503 |    |   |   |   |   |
|    | 0.02334 | 4.16489 | 4.88723 | 0.61958 | 0.77255 | 0.48576 | 0.95510 |         |         |         |         |         |         |         |         |         |         |         |         |         |    |   |   |   |   |
| 71 | 3.10062 | 4.45987 | 4.70258 | 4.15844 | 1.68490 | 4.30085 | 4.50044 | 2.12010 | 4.02807 | 1.79376 | 3.16393 | 4.31815 | 4.59288 | 4.17948 | 4.15858 | 3.63569 | 3.33843 | 1.56264 | 4.88981 | 3.54680 | 87 | v | - | - | - |
|    | 2.68618 | 4.42225 | 2.77519 | 2.73123 | 3.46354 | 2.40513 | 3.72494 | 3.29354 | 2.67741 | 2.69355 | 4.24690 | 2.90347 | 2.73739 | 3.18146 | 2.89801 | 2.37887 | 2.77519 | 2.98518 | 4.58477 | 3.61503 |    |   |   |   |   |
|    | 0.02334 | 4.16489 | 4.88723 | 0.61958 | 0.77255 | 0.48576 | 0.95510 |         |         |         |         |         |         |         |         |         |         |         |         |         |    |   |   |   |   |
| 72 | 2.78219 | 4.49862 | 3.59690 | 3.04856 | 2.98498 | 3.71906 | 1.88174 | 2.88295 | 2.91998 | 2.35825 | 2.50372 | 3.43327 | 4.09391 | 3.27106 | 3.24377 | 2.98516 | 3.01465 | 2.72468 | 4.69660 | 3.25658 | 88 | h | - | - | - |
|    | 2.68618 | 4.42225 | 2.77519 | 2.73123 | 3.46354 | 2.40513 | 3.72494 | 3.29354 | 2.67741 | 2.69355 | 4.24690 | 2.90347 | 2.73739 | 3.18146 | 2.89801 | 2.37887 | 2.77519 | 2.98518 | 4.58477 | 3.61503 |    |   |   |   |   |
|    | 0.02334 | 4.16489 | 4.88723 | 0.61958 | 0.77255 | 0.48576 | 0.95510 |         |         |         |         |         |         |         |         |         |         |         |         |         |    |   |   |   |   |
| 73 | 3.03126 | 4.37869 | 4.67870 | 4.13703 | 3.55748 | 4.33012 | 4.78761 | 1.65804 | 4.02887 | 1.91259 | 3.39886 | 4.35850 | 4.64567 | 4.27381 | 4.22456 | 3.67249 | 2.80876 | 1.14575 | 5.37375 | 4.18380 | 89 | v | - | - | - |
|    | 2.68618 | 4.42225 | 2.77519 | 2.73123 | 3.46354 | 2.40513 | 3.72494 | 3.29354 | 2.67741 | 2.69355 | 4.24690 | 2.90347 | 2.73739 | 3.18146 | 2.89801 | 2.37887 | 2.77519 | 2.98518 | 4.58477 | 3.61503 |    |   |   |   |   |
|    | 0.02334 | 4.16489 | 4.88723 | 0.61958 | 0.77255 | 0.48576 | 0.95510 |         |         |         |         |         |         |         |         |         |         |         |         |         |    |   |   |   |   |
| 74 | 2.55034 | 4.34850 | 4.38888 | 3.81897 | 1.75462 | 4.04358 | 4.30158 | 2.38459 | 3.69189 | 1.69370 | 2.42535 | 4.02988 | 4.36483 | 3.87679 | 3.85500 | 3.35081 | 3.14773 | 2.35058 | 4.82904 | 3.59119 | 90 | l | - | - | - |
|    | 2.68618 | 4.42225 | 2.77519 | 2.73123 | 3.46354 | 2.40513 | 3.72494 | 3.29354 | 2.67741 | 2.69355 | 4.24690 | 2.90347 | 2.73739 | 3.18146 | 2.89801 | 2.37887 | 2.77519 | 2.98518 | 4.58477 | 3.61503 |    |   |   |   |   |
|    | 0.02334 | 4.16489 | 4.88723 | 0.61958 | 0.77255 | 0.48576 | 0.95510 |         |         |         |         |         |         |         |         |         |         |         |         |         |    |   |   |   |   |
| 75 | 2.34364 | 5.02902 | 2.63206 | 2.00985 | 4.35410 | 3.37090 | 3.66558 | 3.80577 | 2.43567 | 3.35246 | 4.14103 | 2.88378 | 2.72705 | 2.79681 | 2.96139 | 2.13753 | 2.92208 | 3.42184 | 5.54286 | 4.15855 | 91 | e | - | - | - |
|    | 2.68618 | 4.42225 | 2.77519 | 2.73123 | 3.46354 | 2.40513 | 3.72494 | 3.29354 | 2.67741 | 2.69355 | 4.24690 | 2.90347 | 2.73739 | 3.18146 | 2.89801 | 2.37887 | 2.77519 | 2.98518 | 4.58477 | 3.61503 |    |   |   |   |   |
|    | 0.02334 | 4.16489 | 4.88723 | 0.61958 | 0.77255 | 0.48576 | 0.95510 |         |         |         |         |         |         |         |         |         |         |         |         |         |    |   |   |   |   |
| 76 | 2.27713 | 4.81312 | 2.67060 | 2.29138 | 4.08427 | 2.50127 | 3.66977 | 3.06260 | 2.48529 | 3.10518 | 3.92155 | 2.96417 | 3.83209 | 2.82419 | 2.95108 | 2.65258 | 2.53082 | 3.16537 | 5.35141 | 4.01416 | 92 | a | - | - | - |
|    | 2.68618 | 4.42225 | 2.77519 | 2.73123 | 3.46354 | 2.40513 | 3.72494 | 3.29354 | 2.67741 | 2.69355 | 4.24690 | 2.90347 | 2.73739 | 3.18146 | 2.89801 | 2.37887 | 2.77519 | 2.98518 | 4.58477 | 3.61503 |    |   |   |   |   |
|    | 0.02334 | 4.16489 | 4.88723 | 0.61958 | 0.77255 | 0.48576 | 0.95510 |         |         |         |         |         |         |         |         |         |         |         |         |         |    |   |   |   |   |
| 77 | 3.86835 | 5.12987 | 4.56789 | 4.35347 | 3.02935 | 4.08352 | 4.30963 | 3.91661 | 4.07628 | 3.25628 | 4.53479 | 4.44682 | 4.62737 | 4.44811 | 4.14946 | 4.06898 | 4.18585 | 3.81445 | 0.45737 | 3.01784 | 93 | w | - | - | - |
|    | 2.68618 | 4.42225 | 2.77519 | 2.73123 | 3.46354 | 2.40513 | 3.72494 | 3.29354 | 2.67741 | 2.69355 | 4.24690 | 2.90347 | 2.73739 | 3.18146 | 2.89801 | 2.37887 | 2.77519 | 2.98518 | 4.58477 | 3.61503 |    |   |   |   |   |
|    | 0.02334 | 4.16489 | 4.88723 | 0.61958 | 0.77255 | 0.48576 | 0.95510 |         |         |         |         |         |         |         |         |         |         |         |         |         |    |   |   |   |   |
| 78 | 3.18863 | 4.88603 | 3.82888 | 3.71728 | 4.67093 | 3.55752 | 4.76170 | 4.30328 | 3.80198 | 3.89323 | 4.96207 | 3.98991 | 0.42795 | 4.18131 | 4.00541 | 3.36743 | 3.65485 | 3.91304 | 5.76614 | 4.79867 | 94 | P | - | - | - |
|    | 2.68618 | 4.42225 | 2.77519 | 2.73123 | 3.46354 | 2.40513 | 3.72494 | 3.29354 | 2.67741 | 2.69355 | 4.24690 | 2.90347 | 2.73739 | 3.18146 | 2.89801 | 2.37887 | 2.77519 | 2.98518 | 4.58477 | 3.61503 |    |   |   |   |   |
|    | 0.02334 | 4.16489 | 4.88723 | 0.61958 | 0.77255 | 0.48576 | 0.95510 |         |         |         |         |         |         |         |         |         |         |         |         |         |    |   |   |   |   |
| 79 | 2.64107 | 4.96185 | 2.95118 | 1.93333 | 4.24529 | 3.43002 | 3.16143 | 3.34697 | 2.34164 | 3.23346 | 4.02252 | 2.93026 | 3.82306 | 2.30774 | 2.58769 | 2.64046 | 2.86932 | 3.04713 | 5.42364 | 4.06846 | 95 | e | - | - | - |
|    | 2.68618 | 4.42225 | 2.77519 | 2.73123 | 3.46354 | 2.40513 | 3.72494 | 3.29354 | 2.67741 | 2.69355 | 4.24690 | 2.90347 | 2.73739 | 3.18146 | 2.89801 | 2.37887 | 2.77519 | 2.98518 | 4.58477 | 3.61503 |    |   |   |   |   |
|    | 0.02334 | 4.16489 | 4.88723 | 0.61958 | 0.77255 | 0.48576 | 0.95510 |         |         |         |         |         |         |         |         |         |         |         |         |         |    |   |   |   |   |
| 80 | 2.02788 | 4.73502 | 2.94382 | 2.04104 | 4.18289 | 3.33413 | 3.76641 | 3.58611 | 2.59658 | 3.20846 | 4.02838 | 3.01191 | 3.83420 | 2.93189 | 3.04640 | 2.33092 | 2.17667 | 3.22309 | 5.45150 | 4.12483 | 96 | a | - | - | - |
|    | 2.68618 | 4.422   |         |         |         |         |         |         |         |         |         |         |         |         |         |         |         |         |         |         |    |   |   |   |   |

|     |         |         |         |         |         |         |         |         |         |         |         |         |         |         |         |         |         |         |         |         |     |   |   |   |   |
|-----|---------|---------|---------|---------|---------|---------|---------|---------|---------|---------|---------|---------|---------|---------|---------|---------|---------|---------|---------|---------|-----|---|---|---|---|
|     | 2.68618 | 4.42225 | 2.77519 | 2.73123 | 3.46354 | 2.40513 | 3.72494 | 3.29354 | 2.67741 | 2.69355 | 4.24690 | 2.90347 | 2.73739 | 3.18146 | 2.89801 | 2.37887 | 2.77519 | 2.98518 | 4.58477 | 3.61503 |     |   |   |   |   |
|     | 0.02334 | 4.16489 | 4.88723 | 0.61958 | 0.77255 | 0.48576 | 0.95510 |         |         |         |         |         |         |         |         |         |         |         |         |         |     |   |   |   |   |
| 86  | 2.38097 | 4.20922 | 3.95778 | 3.41047 | 3.44923 | 3.68376 | 4.14884 | 1.86843 | 3.32547 | 2.43160 | 3.40581 | 3.67672 | 4.12067 | 3.59479 | 3.58537 | 2.47440 | 2.69403 | 1.72440 | 4.98763 | 3.78033 | 102 | v | - | - | - |
|     | 2.68618 | 4.42225 | 2.77519 | 2.73123 | 3.46354 | 2.40513 | 3.72494 | 3.29354 | 2.67741 | 2.69355 | 4.24690 | 2.90347 | 2.73739 | 3.18146 | 2.89801 | 2.37887 | 2.77519 | 2.98518 | 4.58477 | 3.61503 |     |   |   |   |   |
|     | 0.02334 | 4.16489 | 4.88723 | 0.61958 | 0.77255 | 0.48576 | 0.95510 |         |         |         |         |         |         |         |         |         |         |         |         |         |     |   |   |   |   |
| 87  | 1.93512 | 4.33167 | 3.45817 | 3.00303 | 4.00332 | 2.90603 | 4.04444 | 2.81621 | 2.98803 | 3.06898 | 3.92805 | 3.30549 | 3.83267 | 3.30313 | 3.34985 | 1.45961 | 2.80615 | 2.97549 | 5.38291 | 4.14051 | 103 | s | - | - | - |
|     | 2.68618 | 4.42225 | 2.77519 | 2.73123 | 3.46354 | 2.40513 | 3.72494 | 3.29354 | 2.67741 | 2.69355 | 4.24690 | 2.90347 | 2.73739 | 3.18146 | 2.89801 | 2.37887 | 2.77519 | 2.98518 | 4.58477 | 3.61503 |     |   |   |   |   |
|     | 0.02334 | 4.16489 | 4.88723 | 0.61958 | 0.77255 | 0.48576 | 0.95510 |         |         |         |         |         |         |         |         |         |         |         |         |         |     |   |   |   |   |
| 88  | 3.75093 | 4.97771 | 4.75667 | 4.46427 | 0.79991 | 4.50000 | 3.60427 | 3.35253 | 4.30308 | 2.65022 | 3.95258 | 4.20611 | 4.81145 | 4.26361 | 4.32022 | 3.88655 | 3.97785 | 3.30961 | 3.73850 | 1.75164 | 104 | f | - | - | - |
|     | 2.68618 | 4.42225 | 2.77519 | 2.73123 | 3.46354 | 2.40513 | 3.72494 | 3.29354 | 2.67741 | 2.69355 | 4.24690 | 2.90347 | 2.73739 | 3.18146 | 2.89801 | 2.37887 | 2.77519 | 2.98518 | 4.58477 | 3.61503 |     |   |   |   |   |
|     | 0.02334 | 4.16489 | 4.88723 | 0.61958 | 0.77255 | 0.48576 | 0.95510 |         |         |         |         |         |         |         |         |         |         |         |         |         |     |   |   |   |   |
| 89  | 3.41684 | 4.71632 | 5.05415 | 4.49591 | 2.41629 | 4.67352 | 4.85686 | 2.00271 | 4.36353 | 0.84735 | 2.91814 | 4.70253 | 4.83290 | 4.40232 | 4.43684 | 4.02532 | 3.63295 | 2.38659 | 5.07803 | 3.88940 | 105 | l | - | - | - |
|     | 2.68618 | 4.42225 | 2.77519 | 2.73123 | 3.46354 | 2.40513 | 3.72494 | 3.29354 | 2.67741 | 2.69355 | 4.24690 | 2.90347 | 2.73739 | 3.18146 | 2.89801 | 2.37887 | 2.77519 | 2.98518 | 4.58477 | 3.61503 |     |   |   |   |   |
|     | 0.02334 | 4.16489 | 4.88723 | 0.61958 | 0.77255 | 0.48576 | 0.95510 |         |         |         |         |         |         |         |         |         |         |         |         |         |     |   |   |   |   |
| 90  | 2.91580 | 5.11872 | 2.66847 | 2.48929 | 4.08036 | 3.41069 | 3.01735 | 4.00785 | 2.65783 | 3.53938 | 4.42225 | 1.20117 | 3.97408 | 3.05413 | 3.04977 | 2.90510 | 3.20810 | 3.64038 | 5.42593 | 3.94385 | 106 | n | - | - | - |
|     | 2.68618 | 4.42225 | 2.77519 | 2.73123 | 3.46354 | 2.40513 | 3.72494 | 3.29354 | 2.67741 | 2.69355 | 4.24690 | 2.90347 | 2.73739 | 3.18146 | 2.89801 | 2.37887 | 2.77519 | 2.98518 | 4.58477 | 3.61503 |     |   |   |   |   |
|     | 0.02334 | 4.16489 | 4.88723 | 0.61958 | 0.77255 | 0.48576 | 0.95510 |         |         |         |         |         |         |         |         |         |         |         |         |         |     |   |   |   |   |
| 91  | 2.34455 | 4.12246 | 4.26970 | 3.68641 | 2.40707 | 3.83114 | 4.13229 | 1.87044 | 3.55210 | 2.14989 | 3.17218 | 3.85248 | 4.18734 | 3.75040 | 3.69814 | 3.13037 | 2.92538 | 1.95456 | 4.72822 | 3.04892 | 107 | i | - | - | - |
|     | 2.68618 | 4.42225 | 2.77519 | 2.73123 | 3.46354 | 2.40513 | 3.72494 | 3.29354 | 2.67741 | 2.69355 | 4.24690 | 2.90347 | 2.73739 | 3.18146 | 2.89801 | 2.37887 | 2.77519 | 2.98518 | 4.58477 | 3.61503 |     |   |   |   |   |
|     | 0.02334 | 4.16489 | 4.88723 | 0.61958 | 0.77255 | 0.48576 | 0.95510 |         |         |         |         |         |         |         |         |         |         |         |         |         |     |   |   |   |   |
| 92  | 2.49349 | 4.34344 | 3.44377 | 3.02470 | 2.41470 | 1.79629 | 3.99805 | 3.21282 | 3.04128 | 2.90980 | 3.80225 | 3.33913 | 3.89199 | 3.33730 | 3.38739 | 2.12800 | 2.85575 | 2.90016 | 5.12088 | 3.78921 | 108 | g | - | - | - |
|     | 2.68618 | 4.42225 | 2.77519 | 2.73123 | 3.46354 | 2.40513 | 3.72494 | 3.29354 | 2.67741 | 2.69355 | 4.24690 | 2.90347 | 2.73739 | 3.18146 | 2.89801 | 2.37887 | 2.77519 | 2.98518 | 4.58477 | 3.61503 |     |   |   |   |   |
|     | 0.02334 | 4.16489 | 4.88723 | 0.61958 | 0.77255 | 0.48576 | 0.95510 |         |         |         |         |         |         |         |         |         |         |         |         |         |     |   |   |   |   |
| 93  | 2.67938 | 4.33149 | 3.63752 | 2.39994 | 3.48925 | 3.70014 | 3.97955 | 2.02897 | 3.01807 | 2.45495 | 3.14647 | 3.46750 | 4.07424 | 3.32417 | 3.35555 | 2.95949 | 2.58211 | 1.95430 | 4.99796 | 3.76954 | 109 | v | - | - | - |
|     | 2.68618 | 4.42225 | 2.77519 | 2.73123 | 3.46354 | 2.40513 | 3.72494 | 3.29354 | 2.67741 | 2.69355 | 4.24690 | 2.90347 | 2.73739 | 3.18146 | 2.89801 | 2.37887 | 2.77519 | 2.98518 | 4.58477 | 3.61503 |     |   |   |   |   |
|     | 0.02334 | 4.16489 | 4.88723 | 0.61958 | 0.77255 | 0.48576 | 0.95510 |         |         |         |         |         |         |         |         |         |         |         |         |         |     |   |   |   |   |
| 94  | 3.18863 | 4.88603 | 3.82888 | 3.71728 | 4.67093 | 3.55752 | 4.76170 | 4.30328 | 3.80198 | 3.89323 | 4.96207 | 3.98991 | 4.02795 | 4.18131 | 4.00541 | 3.36743 | 3.65485 | 3.91304 | 5.76614 | 4.79867 | 110 | P | - | - | - |
|     | 2.68618 | 4.42225 | 2.77519 | 2.73123 | 3.46354 | 2.40513 | 3.72494 | 3.29354 | 2.67741 | 2.69355 | 4.24690 | 2.90347 | 2.73739 | 3.18146 | 2.89801 | 2.37887 | 2.77519 | 2.98518 | 4.58477 | 3.61503 |     |   |   |   |   |
|     | 0.02334 | 4.16489 | 4.88723 | 0.61958 | 0.77255 | 0.48576 | 0.95510 |         |         |         |         |         |         |         |         |         |         |         |         |         |     |   |   |   |   |
| 95  | 3.07087 | 4.80683 | 3.80366 | 3.74507 | 4.86220 | 0.39323 | 4.83738 | 4.54296 | 3.96555 | 4.15653 | 5.14181 | 3.96927 | 4.20642 | 4.26711 | 4.15990 | 3.25273 | 3.57468 | 4.01458 | 5.86989 | 4.97743 | 111 | G | - | - | - |
|     | 2.68618 | 4.42225 | 2.77519 | 2.73123 | 3.46354 | 2.40513 | 3.72494 | 3.29354 | 2.67741 | 2.69355 | 4.24690 | 2.90347 | 2.73739 | 3.18146 | 2.89801 | 2.37887 | 2.77519 | 2.98518 | 4.58477 | 3.61503 |     |   |   |   |   |
|     | 0.02334 | 4.16489 | 4.88723 | 0.61958 | 0.77255 | 0.48576 | 0.95510 |         |         |         |         |         |         |         |         |         |         |         |         |         |     |   |   |   |   |
| 96  | 3.18863 | 4.88603 | 3.82888 | 3.71728 | 4.67093 | 3.55752 | 4.76170 | 4.30328 | 3.80198 | 3.89323 | 4.96207 | 3.98991 | 4.02795 | 4.18131 | 4.00541 | 3.36743 | 3.65485 | 3.91304 | 5.76614 | 4.79867 | 112 | P | - | - | - |
|     | 2.68618 | 4.42225 | 2.77519 | 2.73123 | 3.46354 | 2.40513 | 3.72494 | 3.29354 | 2.67741 | 2.69355 | 4.24690 | 2.90347 | 2.73739 | 3.18146 | 2.89801 | 2.37887 | 2.77519 | 2.98518 | 4.58477 | 3.61503 |     |   |   |   |   |
|     | 0.02334 | 4.16489 | 4.88723 | 0.61958 | 0.77255 | 0.48576 | 0.95510 |         |         |         |         |         |         |         |         |         |         |         |         |         |     |   |   |   |   |
| 97  | 2.65388 | 4.52820 | 3.31310 | 2.77936 | 3.74979 | 3.52096 | 3.78985 | 3.09185 | 2.58995 | 2.79049 | 3.67516 | 3.21341 | 3.93970 | 2.59593 | 2.61883 | 2.55330 | 2.90025 | 1.76880 | 5.11835 | 3.86444 | 113 | v | - | - | - |
|     | 2.68618 | 4.42225 | 2.77519 | 2.73123 | 3.46354 | 2.40513 | 3.72494 | 3.29354 | 2.67741 | 2.69355 | 4.24690 | 2.90347 | 2.73739 | 3.18146 | 2.89801 | 2.37887 | 2.77519 | 2.98518 | 4.58477 | 3.61503 |     |   |   |   |   |
|     | 0.02334 | 4.16489 | 4.88723 | 0.61958 | 0.77255 | 0.48576 | 0.95510 |         |         |         |         |         |         |         |         |         |         |         |         |         |     |   |   |   |   |
| 98  | 3.19717 | 4.53671 | 4.86469 | 4.28564 | 2.05223 | 4.42046 | 4.68282 | 2.27383 | 4.15158 | 1.15498 | 2.56079 | 4.46854 | 4.64639 | 4.23143 | 4.23564 | 3.74961 | 3.41758 | 2.01993 | 5.02079 | 3.88263 | 114 | l | - | - | - |
|     | 2.68618 | 4.42225 | 2.77519 | 2.73123 | 3.46354 | 2.40513 | 3.72494 | 3.29354 | 2.67741 | 2.69355 | 4.24690 | 2.90347 | 2.73739 | 3.18146 | 2.89801 | 2.37887 | 2.77519 | 2.98518 | 4.58477 | 3.61503 |     |   |   |   |   |
|     | 0.02334 | 4.16489 | 4.88723 | 0.61958 | 0.77255 | 0.48576 | 0.95510 |         |         |         |         |         |         |         |         |         |         |         |         |         |     |   |   |   |   |
| 99  | 3.23387 | 4.50575 | 5.04694 | 4.51797 | 3.50470 | 4.64564 | 5.12622 | 1.30021 | 4.41019 | 1.58371 | 3.29265 | 4.72001 | 4.88132 | 4.59500 | 4.55642 | 4.01857 | 3.47864 | 1.35879 | 5.51443 | 4.36755 | 115 | i | - | - | - |
|     | 2.68618 | 4.42225 | 2.77519 | 2.73123 | 3.46354 | 2.40513 | 3.72494 | 3.29354 | 2.67741 | 2.69355 | 4.24690 | 2.90347 | 2.73739 | 3.18146 | 2.89801 | 2.37887 | 2.77519 | 2.98518 | 4.58477 | 3.61503 |     |   |   |   |   |
|     | 0.02334 | 4.16489 | 4.88723 | 0.61958 | 0.77255 | 0.48576 | 0.95510 |         |         |         |         |         |         |         |         |         |         |         |         |         |     |   |   |   |   |
| 100 | 3.21882 | 5.25214 | 3.67805 | 2.99330 | 4.73034 | 3.78914 | 3.72480 | 4.07985 | 1.77232 | 3.51405 | 4.41051 | 3.35919 | 4.16664 | 2.86775 | 0.98092 | 3.22490 | 3.38107 | 3.77521 | 5.53220 | 4.39683 | 116 | r | - | - | - |
|     | 2.68618 | 4.42225 | 2.77519 | 2.73123 | 3.46354 | 2.40513 | 3.72494 | 3.29354 | 2.67741 | 2.69355 | 4.24690 | 2.90347 | 2.73739 | 3.18146 | 2.89801 | 2.37887 | 2.77519 | 2.98518 | 4.58477 | 3.61503 |     |   |   |   |   |
|     | 0.02334 | 4.16489 | 4.88723 | 0.61958 | 0.77255 | 0.48576 | 0.95510 |         |         |         |         |         |         |         |         |         |         |         |         |         |     |   |   |   |   |
| 101 | 2.29418 | 4.92260 | 2.97526 | 2.39746 | 4.24515 | 3.44628 | 3.67025 | 3.65133 | 1.74145 | 3.22772 | 4.04247 | 2.99099 | 3.86938 | 2.76479 | 2.75715 | 2.71302 | 2.31785 | 3.30771 | 5.43135 | 4.10855 | 117 | k | - | - | - |
|     | 2.68618 | 4.42225 | 2.77519 | 2.73123 | 3.46354 | 2.40513 | 3.72494 | 3.29354 | 2.67741 | 2.69355 | 4.24690 | 2.90347 | 2.73739 | 3.18146 | 2.89801 | 2.37887 | 2.77519 | 2.98518 | 4.58477 | 3.61503 |     |   |   |   |   |
|     | 0.02334 | 4.16489 | 4.88723 | 0.61958 | 0.77255 | 0.48576 | 0.95510 |         |         |         |         |         |         |         |         |         |         |         |         |         |     |   |   |   |   |
| 102 | 1.92654 | 4.90745 | 2.69634 | 1.72350 | 4.41152 | 2.35652 | 3.80910 | 3.83744 | 2.67158 | 3.43113 | 4.25045 | 2.94644 | 3.85588 | 2.97101 | 3.14516 | 2.70305 | 2.99066 | 3.43884 | 5.64400 | 4.28144 | 118 | e | - | - | - |
|     | 2.68618 | 4.42225 | 2.77519 | 2.73123 | 3.46354 | 2.40513 | 3.72494 | 3.29354 | 2.67741 | 2.69355 | 4.24690 | 2.90347 | 2.73739 | 3.18146 | 2.89801 | 2.37887 | 2.77519 | 2.98518 | 4.58477 | 3.61503 |     |   |   |   |   |
|     | 0.02334 | 4.16489 | 4.88723 | 0.61958 | 0.77255 | 0.48    |         |         |         |         |         |         |         |         |         |         |         |         |         |         |     |   |   |   |   |



|     |         |         |         |         |         |         |         |         |         |         |         |         |         |         |         |         |         |         |         |         |     |   |   |   |   |
|-----|---------|---------|---------|---------|---------|---------|---------|---------|---------|---------|---------|---------|---------|---------|---------|---------|---------|---------|---------|---------|-----|---|---|---|---|
| 130 | 1.06629 | 4.25576 | 3.57776 | 3.34883 | 4.47365 | 1.77408 | 4.42038 | 3.84730 | 3.44691 | 3.58038 | 4.42024 | 3.45636 | 3.80161 | 3.71393 | 3.73468 | 2.51146 | 2.83250 | 3.28583 | 5.81309 | 4.62905 | 147 | a | - | - | - |
|     | 2.68618 | 4.42225 | 2.77519 | 2.73123 | 3.46354 | 2.40513 | 3.72494 | 3.29354 | 2.67741 | 2.69355 | 4.24690 | 2.90347 | 2.73739 | 3.18146 | 2.89801 | 2.37887 | 2.77519 | 2.98518 | 4.58477 | 3.61503 |     |   |   |   |   |
|     | 0.02334 | 4.16489 | 4.88723 | 0.61958 | 0.77255 | 0.48576 | 0.95510 |         |         |         |         |         |         |         |         |         |         |         |         |         |     |   |   |   |   |
| 131 | 3.36714 | 5.16534 | 3.89059 | 3.35258 | 4.59608 | 3.78529 | 4.08066 | 4.16726 | 2.41459 | 3.63009 | 4.63119 | 3.68530 | 4.28143 | 3.29398 | 0.61106 | 3.44264 | 3.61809 | 3.88059 | 5.56480 | 4.46945 | 148 | R | - | - | - |
|     | 2.68618 | 4.42225 | 2.77519 | 2.73123 | 3.46354 | 2.40513 | 3.72494 | 3.29354 | 2.67741 | 2.69355 | 4.24690 | 2.90347 | 2.73739 | 3.18146 | 2.89801 | 2.37887 | 2.77519 | 2.98518 | 4.58477 | 3.61503 |     |   |   |   |   |
|     | 0.02334 | 4.16489 | 4.88723 | 0.61958 | 0.77255 | 0.48576 | 0.95510 |         |         |         |         |         |         |         |         |         |         |         |         |         |     |   |   |   |   |
| 132 | 2.67789 | 4.75160 | 3.16313 | 2.58728 | 3.95903 | 3.51110 | 3.67660 | 3.36785 | 2.39078 | 2.69639 | 3.83326 | 2.77556 | 3.89469 | 2.70941 | 1.87211 | 2.74295 | 2.90121 | 2.79372 | 5.23623 | 3.61625 | 149 | r | - | - | - |
|     | 2.68618 | 4.42225 | 2.77519 | 2.73123 | 3.46354 | 2.40513 | 3.72494 | 3.29354 | 2.67741 | 2.69355 | 4.24690 | 2.90347 | 2.73739 | 3.18146 | 2.89801 | 2.37887 | 2.77519 | 2.98518 | 4.58477 | 3.61503 |     |   |   |   |   |
|     | 0.02334 | 4.16489 | 4.88723 | 0.61958 | 0.77255 | 0.48576 | 0.95510 |         |         |         |         |         |         |         |         |         |         |         |         |         |     |   |   |   |   |
| 133 | 2.11312 | 4.50454 | 3.15830 | 2.77133 | 4.17703 | 3.07331 | 3.94283 | 3.57464 | 2.80677 | 3.22635 | 4.06258 | 3.16480 | 1.68648 | 2.92977 | 3.20037 | 2.61015 | 2.51389 | 3.17708 | 5.48898 | 4.21297 | 150 | p | - | - | - |
|     | 2.68618 | 4.42225 | 2.77519 | 2.73123 | 3.46354 | 2.40513 | 3.72494 | 3.29354 | 2.67741 | 2.69355 | 4.24690 | 2.90347 | 2.73739 | 3.18146 | 2.89801 | 2.37887 | 2.77519 | 2.98518 | 4.58477 | 3.61503 |     |   |   |   |   |
|     | 0.02334 | 4.16489 | 4.88723 | 0.61958 | 0.77255 | 0.48576 | 0.95510 |         |         |         |         |         |         |         |         |         |         |         |         |         |     |   |   |   |   |
| 134 | 3.07087 | 4.80683 | 3.80366 | 3.74507 | 4.86220 | 0.39323 | 4.83738 | 4.54296 | 3.96555 | 4.15653 | 5.14181 | 3.96927 | 4.20642 | 4.26711 | 4.15990 | 3.25273 | 3.57468 | 4.01458 | 5.86989 | 4.97743 | 151 | G | - | - | - |
|     | 2.68618 | 4.42225 | 2.77519 | 2.73123 | 3.46354 | 2.40513 | 3.72494 | 3.29354 | 2.67741 | 2.69355 | 4.24690 | 2.90347 | 2.73739 | 3.18146 | 2.89801 | 2.37887 | 2.77519 | 2.98518 | 4.58477 | 3.61503 |     |   |   |   |   |
|     | 0.02334 | 4.16489 | 4.88723 | 0.61958 | 0.77255 | 0.48576 | 0.95510 |         |         |         |         |         |         |         |         |         |         |         |         |         |     |   |   |   |   |
| 135 | 2.62429 | 4.98811 | 2.36689 | 2.29633 | 4.27847 | 3.40562 | 3.30124 | 3.26201 | 2.36468 | 3.26860 | 4.04643 | 2.76691 | 3.80492 | 2.72724 | 2.40153 | 2.61500 | 2.47670 | 3.34961 | 5.45356 | 4.08010 | 152 | e | - | - | - |
|     | 2.68618 | 4.42225 | 2.77519 | 2.73123 | 3.46354 | 2.40513 | 3.72494 | 3.29354 | 2.67741 | 2.69355 | 4.24690 | 2.90347 | 2.73739 | 3.18146 | 2.89801 | 2.37887 | 2.77519 | 2.98518 | 4.58477 | 3.61503 |     |   |   |   |   |
|     | 0.02334 | 4.16489 | 4.88723 | 0.61958 | 0.77255 | 0.48576 | 0.95510 |         |         |         |         |         |         |         |         |         |         |         |         |         |     |   |   |   |   |
| 136 | 3.80232 | 4.99441 | 4.81117 | 4.50654 | 1.83269 | 4.53046 | 3.51797 | 3.54867 | 4.32198 | 2.87633 | 4.11701 | 4.17994 | 4.82456 | 4.25191 | 4.32273 | 3.89037 | 4.01448 | 3.44948 | 1.28803 | 1.42818 | 153 | w | - | - | - |
|     | 2.68618 | 4.42225 | 2.77519 | 2.73123 | 3.46354 | 2.40513 | 3.72494 | 3.29354 | 2.67741 | 2.69355 | 4.24690 | 2.90347 | 2.73739 | 3.18146 | 2.89801 | 2.37887 | 2.77519 | 2.98518 | 4.58477 | 3.61503 |     |   |   |   |   |
|     | 0.02334 | 4.16489 | 4.88723 | 0.61958 | 0.77255 | 0.48576 | 0.95510 |         |         |         |         |         |         |         |         |         |         |         |         |         |     |   |   |   |   |
| 137 | 2.84259 | 4.87830 | 3.03855 | 2.72635 | 3.92476 | 3.46250 | 1.42342 | 3.76637 | 2.67708 | 3.33336 | 4.22974 | 3.18720 | 2.33842 | 3.12978 | 3.02387 | 2.90112 | 3.14202 | 3.43177 | 5.28091 | 3.86528 | 154 | h | - | - | - |
|     | 2.68618 | 4.42225 | 2.77519 | 2.73123 | 3.46354 | 2.40513 | 3.72494 | 3.29354 | 2.67741 | 2.69355 | 4.24690 | 2.90347 | 2.73739 | 3.18146 | 2.89801 | 2.37887 | 2.77519 | 2.98518 | 4.58477 | 3.61503 |     |   |   |   |   |
|     | 0.02334 | 4.16489 | 4.88723 | 0.61958 | 0.77255 | 0.48576 | 0.95510 |         |         |         |         |         |         |         |         |         |         |         |         |         |     |   |   |   |   |
| 138 | 3.14546 | 4.46014 | 4.85404 | 4.32140 | 3.53253 | 4.49003 | 4.96880 | 1.69151 | 4.20689 | 2.04505 | 2.79913 | 4.53988 | 4.77264 | 4.43417 | 4.38609 | 3.85019 | 3.39591 | 0.99044 | 5.46443 | 4.29328 | 155 | v | - | - | - |
|     | 2.68618 | 4.42225 | 2.77519 | 2.73123 | 3.46354 | 2.40513 | 3.72494 | 3.29354 | 2.67741 | 2.69355 | 4.24690 | 2.90347 | 2.73739 | 3.18146 | 2.89801 | 2.37887 | 2.77519 | 2.98518 | 4.58477 | 3.61503 |     |   |   |   |   |
|     | 0.02334 | 4.16489 | 4.88723 | 0.61958 | 0.77255 | 0.48576 | 0.95510 |         |         |         |         |         |         |         |         |         |         |         |         |         |     |   |   |   |   |
| 139 | 2.83413 | 4.86274 | 2.98826 | 2.74016 | 4.04146 | 2.13113 | 1.34254 | 3.87256 | 2.78762 | 3.44809 | 4.33401 | 3.19634 | 3.99233 | 3.20456 | 3.14297 | 2.89842 | 3.16436 | 3.50409 | 5.37917 | 3.98028 | 156 | h | - | - | - |
|     | 2.68618 | 4.42225 | 2.77519 | 2.73123 | 3.46354 | 2.40513 | 3.72494 | 3.29354 | 2.67741 | 2.69355 | 4.24690 | 2.90347 | 2.73739 | 3.18146 | 2.89801 | 2.37887 | 2.77519 | 2.98518 | 4.58477 | 3.61503 |     |   |   |   |   |
|     | 0.02334 | 4.16489 | 4.88723 | 0.61958 | 0.77255 | 0.48576 | 0.95510 |         |         |         |         |         |         |         |         |         |         |         |         |         |     |   |   |   |   |
| 140 | 2.07786 | 4.35132 | 3.43981 | 2.94684 | 3.97270 | 3.23643 | 3.99181 | 3.32404 | 2.92260 | 3.03375 | 3.88742 | 3.27571 | 2.18521 | 3.23964 | 3.29848 | 2.34089 | 2.11245 | 2.55876 | 5.34532 | 4.09879 | 157 | a | - | - | - |
|     | 2.68618 | 4.42225 | 2.77519 | 2.73123 | 3.46354 | 2.40513 | 3.72494 | 3.29354 | 2.67741 | 2.69355 | 4.24690 | 2.90347 | 2.73739 | 3.18146 | 2.89801 | 2.37887 | 2.77519 | 2.98518 | 4.58477 | 3.61503 |     |   |   |   |   |
|     | 0.02334 | 4.16489 | 4.88723 | 0.61958 | 0.77255 | 0.48576 | 0.95510 |         |         |         |         |         |         |         |         |         |         |         |         |         |     |   |   |   |   |
| 141 | 2.67068 | 4.34023 | 3.61661 | 3.05854 | 2.93805 | 3.65946 | 3.92358 | 2.71820 | 2.96683 | 2.32092 | 2.01413 | 3.43837 | 4.03819 | 2.64066 | 3.28494 | 2.92491 | 2.61186 | 2.55379 | 4.90034 | 3.66655 | 158 | m | - | - | - |
|     | 2.68618 | 4.42225 | 2.77519 | 2.73123 | 3.46354 | 2.40513 | 3.72494 | 3.29354 | 2.67741 | 2.69355 | 4.24690 | 2.90347 | 2.73739 | 3.18146 | 2.89801 | 2.37887 | 2.77519 | 2.98518 | 4.58477 | 3.61503 |     |   |   |   |   |
|     | 0.02334 | 4.16489 | 4.88723 | 0.61958 | 0.77255 | 0.48576 | 0.95510 |         |         |         |         |         |         |         |         |         |         |         |         |         |     |   |   |   |   |
| 142 | 3.17238 | 4.50279 | 4.89914 | 4.31511 | 2.64637 | 4.41780 | 4.72868 | 1.96709 | 4.18068 | 1.31063 | 1.92898 | 4.48841 | 4.64524 | 4.25753 | 4.25445 | 3.74820 | 3.39366 | 2.01560 | 5.07543 | 3.99227 | 159 | l | - | - | - |
|     | 2.68618 | 4.42225 | 2.77519 | 2.73123 | 3.46354 | 2.40513 | 3.72494 | 3.29354 | 2.67741 | 2.69355 | 4.24690 | 2.90347 | 2.73739 | 3.18146 | 2.89801 | 2.37887 | 2.77519 | 2.98518 | 4.58477 | 3.61503 |     |   |   |   |   |
|     | 0.02334 | 4.16489 | 4.88723 | 0.61958 | 0.77255 | 0.48576 | 0.95510 |         |         |         |         |         |         |         |         |         |         |         |         |         |     |   |   |   |   |
| 143 | 2.63666 | 4.74600 | 2.77324 | 2.61171 | 4.45459 | 3.21397 | 3.99354 | 4.01016 | 2.88818 | 3.61700 | 4.45978 | 1.25466 | 3.87360 | 3.19967 | 3.30330 | 2.08315 | 3.03256 | 3.53352 | 5.73664 | 4.36593 | 160 | n | - | - | - |
|     | 2.68618 | 4.42225 | 2.77519 | 2.73123 | 3.46354 | 2.40513 | 3.72494 | 3.29354 | 2.67741 | 2.69355 | 4.24690 | 2.90347 | 2.73739 | 3.18146 | 2.89801 | 2.37887 | 2.77519 | 2.98518 | 4.58477 | 3.61503 |     |   |   |   |   |
|     | 0.02334 | 4.16489 | 4.88723 | 0.61958 | 0.77255 | 0.48576 | 0.95510 |         |         |         |         |         |         |         |         |         |         |         |         |         |     |   |   |   |   |
| 144 | 3.15186 | 4.45397 | 4.91368 | 4.36249 | 3.41528 | 4.49831 | 4.91769 | 1.61625 | 4.24938 | 1.74594 | 2.56952 | 4.55718 | 4.75177 | 4.41975 | 4.38663 | 3.84727 | 3.39022 | 1.23103 | 5.34792 | 4.21148 | 161 | v | - | - | - |
|     | 2.68618 | 4.42225 | 2.77519 | 2.73123 | 3.46354 | 2.40513 | 3.72494 | 3.29354 | 2.67741 | 2.69355 | 4.24690 | 2.90347 | 2.73739 | 3.18146 | 2.89801 | 2.37887 | 2.77519 | 2.98518 | 4.58477 | 3.61503 |     |   |   |   |   |
|     | 0.02334 | 4.16489 | 4.88723 | 0.61958 | 0.77255 | 0.48576 | 0.95510 |         |         |         |         |         |         |         |         |         |         |         |         |         |     |   |   |   |   |
| 145 | 2.86459 | 5.27930 | 2.73588 | 1.60319 | 4.63061 | 3.45294 | 3.67763 | 4.07512 | 1.81226 | 3.54854 | 4.35163 | 2.92510 | 3.91201 | 2.36746 | 2.68407 | 2.81319 | 3.09159 | 3.68143 | 5.66352 | 4.30990 | 162 | e | - | - | - |
|     | 2.68618 | 4.42225 | 2.77519 | 2.73123 | 3.46354 | 2.40513 | 3.72494 | 3.29354 | 2.67741 | 2.69355 | 4.24690 | 2.90347 | 2.73739 | 3.18146 | 2.89801 | 2.37887 | 2.77519 | 2.98518 | 4.58477 | 3.61503 |     |   |   |   |   |
|     | 0.02334 | 4.16489 | 4.88723 | 0.61958 | 0.77255 | 0.48576 | 0.95510 |         |         |         |         |         |         |         |         |         |         |         |         |         |     |   |   |   |   |
| 146 | 2.87235 | 5.30761 | 1.88660 | 2.04939 | 4.67403 | 1.66411 | 3.80292 | 4.15371 | 2.74797 | 3.68520 | 4.50851 | 2.81435 | 3.88845 | 2.95993 | 3.29833 | 2.80957 | 2.93444 | 3.73934 | 5.86821 | 4.42012 | 163 | g | - | - | - |
|     | 2.68618 | 4.42225 | 2.77519 | 2.73123 | 3.46354 | 2.40513 | 3.72494 | 3.29354 | 2.67741 | 2.69355 | 4.24690 | 2.90347 | 2.73739 | 3.18146 | 2.89801 | 2.37887 | 2.77519 | 2.98518 | 4.58477 | 3.61503 |     |   |   |   |   |
|     | 0.02334 | 4.16489 | 4.88723 | 0.61958 | 0.77255 | 0.48576 | 0.95510 |         |         |         |         |         |         |         |         |         |         |         |         |         |     |   |   |   |   |
| 147 | 1.84427 | 4.31109 | 3.52603 | 3.11729 | 3.98835 | 1.56532 | 4.13506 | 2.65082 | 3.10518 | 3.02380 | 3.92713 | 3.38219 | 3.86845 | 3.41961 | 3.4395  |         |         |         |         |         |     |   |   |   |   |





|     |         |         |         |         |         |         |         |         |         |         |         |         |         |         |         |         |         |         |         |         |     |   |   |   |   |
|-----|---------|---------|---------|---------|---------|---------|---------|---------|---------|---------|---------|---------|---------|---------|---------|---------|---------|---------|---------|---------|-----|---|---|---|---|
| 197 | 1.86413 | 4.19607 | 3.97897 | 3.40953 | 2.60196 | 3.60766 | 4.07100 | 2.29678 | 3.31355 | 1.94440 | 3.25005 | 3.68103 | 4.12720 | 3.56279 | 3.55079 | 3.03885 | 2.91515 | 2.24961 | 4.82317 | 3.60894 | 215 | a | - | - | - |
|     | 2.68618 | 4.42225 | 2.77519 | 2.73123 | 3.46354 | 2.40513 | 3.72494 | 3.29354 | 2.67741 | 2.69355 | 4.24690 | 2.90347 | 2.73739 | 3.18146 | 2.89801 | 2.37887 | 2.77519 | 2.98518 | 4.58477 | 3.61503 |     |   |   |   |   |
|     | 0.02334 | 4.16489 | 4.88723 | 0.61958 | 0.77255 | 0.48576 | 0.95510 |         |         |         |         |         |         |         |         |         |         |         |         |         |     |   |   |   |   |
| 198 | 2.72165 | 4.37520 | 4.74470 | 4.19018 | 3.30341 | 4.33950 | 4.75092 | 1.55456 | 4.07966 | 1.60228 | 3.27804 | 4.38441 | 4.63242 | 4.27593 | 4.23565 | 3.67584 | 3.28180 | 1.44064 | 5.26283 | 4.09771 | 216 | v | - | - | - |
|     | 2.68618 | 4.42225 | 2.77519 | 2.73123 | 3.46354 | 2.40513 | 3.72494 | 3.29354 | 2.67741 | 2.69355 | 4.24690 | 2.90347 | 2.73739 | 3.18146 | 2.89801 | 2.37887 | 2.77519 | 2.98518 | 4.58477 | 3.61503 |     |   |   |   |   |
|     | 0.02334 | 4.16489 | 4.88723 | 0.61958 | 0.77255 | 0.48576 | 0.95510 |         |         |         |         |         |         |         |         |         |         |         |         |         |     |   |   |   |   |
| 199 | 1.70577 | 4.28588 | 3.50732 | 3.32828 | 4.53830 | 1.06704 | 4.44491 | 3.92235 | 3.47489 | 3.65386 | 4.49877 | 3.45263 | 3.81463 | 3.73960 | 3.76034 | 2.53372 | 2.86478 | 3.34270 | 5.86454 | 4.68232 | 217 | g | - | - | - |
|     | 2.68618 | 4.42225 | 2.77519 | 2.73123 | 3.46354 | 2.40513 | 3.72494 | 3.29354 | 2.67741 | 2.69355 | 4.24690 | 2.90347 | 2.73739 | 3.18146 | 2.89801 | 2.37887 | 2.77519 | 2.98518 | 4.58477 | 3.61503 |     |   |   |   |   |
|     | 0.02334 | 4.16489 | 4.88723 | 0.61958 | 0.77255 | 0.48576 | 0.95510 |         |         |         |         |         |         |         |         |         |         |         |         |         |     |   |   |   |   |
| 200 | 2.18377 | 4.23853 | 4.35497 | 3.78423 | 3.17590 | 4.01344 | 4.36665 | 1.86321 | 3.67664 | 1.96263 | 3.10801 | 4.00447 | 4.35351 | 3.89976 | 3.86567 | 3.31891 | 2.97867 | 1.55448 | 5.00849 | 3.82216 | 218 | v | - | - | - |
|     | 2.68618 | 4.42225 | 2.77519 | 2.73123 | 3.46354 | 2.40513 | 3.72494 | 3.29354 | 2.67741 | 2.69355 | 4.24690 | 2.90347 | 2.73739 | 3.18146 | 2.89801 | 2.37887 | 2.77519 | 2.98518 | 4.58477 | 3.61503 |     |   |   |   |   |
|     | 0.02334 | 4.16489 | 4.88723 | 0.61958 | 0.77255 | 0.48576 | 0.95510 |         |         |         |         |         |         |         |         |         |         |         |         |         |     |   |   |   |   |
| 201 | 1.45119 | 3.80891 | 3.72762 | 3.20122 | 3.02185 | 2.85307 | 4.04471 | 2.86451 | 3.13820 | 2.65172 | 3.56195 | 3.46309 | 3.92589 | 3.41927 | 3.44109 | 2.72666 | 2.81303 | 2.45069 | 5.05145 | 3.83152 | 219 | a | - | - | - |
|     | 2.68618 | 4.42226 | 2.77520 | 2.73124 | 3.46354 | 2.40510 | 3.72495 | 3.29354 | 2.67741 | 2.69351 | 4.24690 | 2.90347 | 2.73740 | 3.18147 | 2.89801 | 2.37887 | 2.77520 | 2.98519 | 4.58477 | 3.61504 |     |   |   |   |   |
|     | 0.04227 | 3.38577 | 4.88723 | 0.63282 | 0.75735 | 0.48576 | 0.95510 |         |         |         |         |         |         |         |         |         |         |         |         |         |     |   |   |   |   |
| 202 | 3.58086 | 4.95839 | 4.41963 | 4.08414 | 2.36814 | 4.20131 | 3.77994 | 3.47178 | 3.75090 | 2.82204 | 4.07037 | 4.09198 | 4.62314 | 4.06026 | 3.87227 | 3.73282 | 3.84247 | 3.38135 | 0.85612 | 2.25455 | 222 | w | - | - | - |
|     | 2.68618 | 4.42225 | 2.77519 | 2.73123 | 3.46354 | 2.40513 | 3.72494 | 3.29354 | 2.67741 | 2.69355 | 4.24690 | 2.90347 | 2.73739 | 3.18146 | 2.89801 | 2.37887 | 2.77519 | 2.98518 | 4.58477 | 3.61503 |     |   |   |   |   |
|     | 0.02334 | 4.16489 | 4.88723 | 0.61958 | 0.77255 | 0.48576 | 0.95510 |         |         |         |         |         |         |         |         |         |         |         |         |         |     |   |   |   |   |
| 203 | 3.06361 | 4.42692 | 4.72964 | 4.14154 | 3.09998 | 4.26575 | 4.56121 | 1.80026 | 3.99521 | 1.12169 | 2.63326 | 4.31605 | 4.52756 | 4.11183 | 4.09006 | 3.58471 | 3.28635 | 2.23011 | 4.20869 | 3.86150 | 223 | l | - | - | - |
|     | 2.68618 | 4.42225 | 2.77519 | 2.73123 | 3.46354 | 2.40513 | 3.72494 | 3.29354 | 2.67741 | 2.69355 | 4.24690 | 2.90347 | 2.73739 | 3.18146 | 2.89801 | 2.37887 | 2.77519 | 2.98518 | 4.58477 | 3.61503 |     |   |   |   |   |
|     | 0.04227 | 4.16489 | 3.65497 | 0.61958 | 0.77255 | 0.48576 | 0.95510 |         |         |         |         |         |         |         |         |         |         |         |         |         |     |   |   |   |   |
| 204 | 2.57929 | 4.11372 | 4.01084 | 3.43010 | 2.92565 | 3.08919 | 4.00691 | 2.39566 | 3.32003 | 1.73618 | 3.19184 | 3.66691 | 4.08258 | 3.55140 | 3.52422 | 3.00020 | 2.85469 | 2.04162 | 4.70777 | 3.02331 | 224 | l | - | - | - |
|     | 2.68618 | 4.42225 | 2.77519 | 2.73123 | 3.46354 | 2.40513 | 3.72494 | 3.29354 | 2.67741 | 2.69355 | 4.24690 | 2.90347 | 2.73739 | 3.18146 | 2.89801 | 2.37887 | 2.77519 | 2.98518 | 4.58477 | 3.61503 |     |   |   |   |   |
|     | 0.02379 | 4.14640 | 4.86874 | 0.61958 | 0.77255 | 0.47215 | 0.97726 |         |         |         |         |         |         |         |         |         |         |         |         |         |     |   |   |   |   |
| 205 | 3.95439 | 5.06073 | 4.96686 | 4.73578 | 1.48265 | 4.62868 | 3.48983 | 3.65252 | 4.54454 | 2.94363 | 4.21059 | 4.24895 | 4.90689 | 4.36206 | 4.46487 | 4.00070 | 4.15995 | 3.56009 | 2.25232 | 0.98366 | 225 | y | - | - | - |
|     | 2.68618 | 4.42225 | 2.77519 | 2.73123 | 3.46354 | 2.40513 | 3.72494 | 3.29354 | 2.67741 | 2.69355 | 4.24690 | 2.90347 | 2.73739 | 3.18146 | 2.89801 | 2.37887 | 2.77519 | 2.98518 | 4.58477 | 3.61503 |     |   |   |   |   |
|     | 0.02334 | 4.16489 | 4.88723 | 0.61958 | 0.77255 | 0.48576 | 0.95510 |         |         |         |         |         |         |         |         |         |         |         |         |         |     |   |   |   |   |
| 206 | 3.58330 | 4.93383 | 4.54895 | 4.21088 | 2.22764 | 4.24603 | 3.80067 | 3.34975 | 3.95948 | 2.67887 | 3.96360 | 4.16369 | 4.65746 | 4.15804 | 4.05926 | 3.76294 | 3.84927 | 3.29162 | 0.87851 | 2.31973 | 226 | w | - | - | - |
|     | 2.68618 | 4.42225 | 2.77520 | 2.73123 | 3.46354 | 2.40509 | 3.72495 | 3.29354 | 2.67741 | 2.69355 | 4.24690 | 2.90347 | 2.73740 | 3.18146 | 2.89801 | 2.37887 | 2.77520 | 2.98518 | 4.58477 | 3.61503 |     |   |   |   |   |
|     | 0.04227 | 3.38577 | 4.88723 | 0.53555 | 0.88031 | 0.48576 | 0.95510 |         |         |         |         |         |         |         |         |         |         |         |         |         |     |   |   |   |   |
| 207 | 2.57120 | 3.46902 | 4.32656 | 3.73629 | 2.56821 | 3.81202 | 4.14372 | 2.27264 | 3.58861 | 1.87178 | 3.03359 | 3.86939 | 4.17173 | 3.77759 | 3.70879 | 3.04170 | 2.79029 | 1.72808 | 4.73212 | 3.54828 | 228 | v | - | - | - |
|     | 2.68618 | 4.42225 | 2.77519 | 2.73123 | 3.46354 | 2.40513 | 3.72494 | 3.29354 | 2.67741 | 2.69355 | 4.24690 | 2.90347 | 2.73739 | 3.18146 | 2.89801 | 2.37887 | 2.77519 | 2.98518 | 4.58477 | 3.61503 |     |   |   |   |   |
|     | 0.02334 | 4.16489 | 4.88723 | 0.61958 | 0.77255 | 0.48576 | 0.95510 |         |         |         |         |         |         |         |         |         |         |         |         |         |     |   |   |   |   |
| 208 | 2.50878 | 4.55483 | 3.22595 | 2.65931 | 3.55123 | 3.50961 | 3.72769 | 2.64756 | 2.36613 | 2.78442 | 3.64911 | 3.12992 | 3.89564 | 2.95020 | 2.18912 | 2.54744 | 2.84776 | 2.64658 | 5.10410 | 3.83076 | 229 | r | - | - | - |
|     | 2.68618 | 4.42225 | 2.77519 | 2.73123 | 3.46354 | 2.40513 | 3.72494 | 3.29354 | 2.67741 | 2.69355 | 4.24690 | 2.90347 | 2.73739 | 3.18146 | 2.89801 | 2.37887 | 2.77519 | 2.98518 | 4.58477 | 3.61503 |     |   |   |   |   |
|     | 0.02334 | 4.16489 | 4.88723 | 0.61958 | 0.77255 | 0.48576 | 0.95510 |         |         |         |         |         |         |         |         |         |         |         |         |         |     |   |   |   |   |
| 209 | 2.86363 | 5.04355 | 3.29516 | 2.65977 | 4.37983 | 3.60443 | 3.64938 | 3.76048 | 1.68365 | 2.83195 | 4.12004 | 2.93304 | 3.97294 | 2.78582 | 1.69263 | 2.87600 | 3.06115 | 3.24759 | 5.42680 | 4.17410 | 230 | k | - | - | - |
|     | 2.68618 | 4.42225 | 2.77519 | 2.73123 | 3.46354 | 2.40513 | 3.72494 | 3.29354 | 2.67741 | 2.69355 | 4.24690 | 2.90347 | 2.73739 | 3.18146 | 2.89801 | 2.37887 | 2.77519 | 2.98518 | 4.58477 | 3.61503 |     |   |   |   |   |
|     | 0.02334 | 4.16489 | 4.88723 | 0.61958 | 0.77255 | 0.48576 | 0.95510 |         |         |         |         |         |         |         |         |         |         |         |         |         |     |   |   |   |   |
| 210 | 2.84554 | 5.01757 | 3.12846 | 2.63182 | 4.41209 | 3.53047 | 3.70694 | 3.81245 | 1.79402 | 3.34542 | 4.18423 | 3.10209 | 1.82313 | 2.85272 | 2.32856 | 2.86279 | 3.07663 | 3.47040 | 5.48992 | 4.22310 | 231 | k | - | - | - |
|     | 2.68618 | 4.42225 | 2.77519 | 2.73123 | 3.46354 | 2.40513 | 3.72494 | 3.29354 | 2.67741 | 2.69355 | 4.24690 | 2.90347 | 2.73739 | 3.18146 | 2.89801 | 2.37887 | 2.77519 | 2.98518 | 4.58477 | 3.61503 |     |   |   |   |   |
|     | 0.16929 | 4.16489 | 1.96466 | 0.61958 | 0.77255 | 0.48576 | 0.95510 |         |         |         |         |         |         |         |         |         |         |         |         |         |     |   |   |   |   |
| 211 | 2.48923 | 4.29049 | 3.42922 | 2.86387 | 3.43888 | 2.80417 | 3.79648 | 2.60432 | 2.80958 | 2.27963 | 3.17436 | 3.27050 | 3.29185 | 3.12078 | 3.04457 | 2.77802 | 2.79447 | 2.33652 | 4.88545 | 3.64992 | 232 | l | - | - | - |
|     | 2.68618 | 4.42225 | 2.77519 | 2.73123 | 3.46354 | 2.40513 | 3.72494 | 3.29354 | 2.67741 | 2.69355 | 4.24690 | 2.90347 | 2.73739 | 3.18146 | 2.89801 | 2.37887 | 2.77519 | 2.98518 | 4.58477 | 3.61503 |     |   |   |   |   |
|     | 0.02696 | 4.02256 | 4.74491 | 0.61958 | 0.77255 | 0.40204 | 1.10549 |         |         |         |         |         |         |         |         |         |         |         |         |         |     |   |   |   |   |
| 212 | 2.91829 | 4.36627 | 4.36197 | 3.82936 | 1.53403 | 4.01795 | 4.27788 | 2.01781 | 3.70336 | 2.00908 | 3.22397 | 4.02136 | 4.38108 | 3.91235 | 3.87976 | 3.34641 | 2.69513 | 2.24748 | 4.79234 | 3.44254 | 233 | f | - | - | - |
|     | 2.68618 | 4.42225 | 2.77519 | 2.73123 | 3.46354 | 2.40513 | 3.72494 | 3.29354 | 2.67741 | 2.69355 | 4.24690 | 2.90347 | 2.73739 | 3.18146 | 2.89801 | 2.37887 | 2.77519 | 2.98518 | 4.58477 | 3.61503 |     |   |   |   |   |
|     | 0.02334 | 4.16489 | 4.88723 | 0.61958 | 0.77255 | 0.48576 | 0.95510 |         |         |         |         |         |         |         |         |         |         |         |         |         |     |   |   |   |   |
| 213 | 2.49953 | 4.27039 | 4.26593 | 3.70818 | 3.46853 | 3.98958 | 4.38899 | 1.59363 | 3.61146 | 2.11614 | 3.37888 | 3.96305 | 4.35465 | 3.86831 | 3.84184 | 3.30058 | 2.32985 | 1.69239 | 5.11261 | 3.91176 | 234 | i | - | - | - |
|     | 2.68618 | 4.42225 | 2.77519 | 2.73123 | 3.46354 | 2.40513 | 3.72494 | 3.29354 | 2.67741 | 2.69355 | 4.24690 | 2.90347 | 2.73739 | 3.18146 | 2.89801 | 2.37887 | 2.77519 | 2.98518 | 4.58477 | 3.61503 |     |   |   |   |   |
|     | 0.02334 | 4.16489 | 4.88723 | 0.61958 | 0.77255 | 0.48576 | 0.95510 |         |         |         |         |         |         |         |         |         |         |         |         |         |     |   |   |   |   |
| 214 | 2.27493 | 4.68023 | 3.09549 | 2.60072 | 4.20059 | 3.11403 | 3.77394 | 3.62022 | 2.54541 | 3.22150 | 4.03423 | 3.06099 | 2.23191 | 2.93610 | 2.3010  |         |         |         |         |         |     |   |   |   |   |

|     |         |         |         |         |         |         |         |         |         |         |         |         |         |         |         |         |         |         |         |         |     |   |   |   |   |
|-----|---------|---------|---------|---------|---------|---------|---------|---------|---------|---------|---------|---------|---------|---------|---------|---------|---------|---------|---------|---------|-----|---|---|---|---|
|     | 2.68618 | 4.42225 | 2.77519 | 2.73123 | 3.46354 | 2.40513 | 3.72494 | 3.29354 | 2.67741 | 2.69355 | 4.24690 | 2.90347 | 2.73739 | 3.18146 | 2.89801 | 2.37887 | 2.77519 | 2.98518 | 4.58477 | 3.61503 |     |   |   |   |   |
|     | 0.02334 | 4.16489 | 4.88723 | 0.61958 | 0.77255 | 0.48576 | 0.95510 |         |         |         |         |         |         |         |         |         |         |         |         |         |     |   |   |   |   |
| 220 | 2.15001 | 4.97190 | 2.52547 | 2.19225 | 4.25483 | 3.05724 | 3.62211 | 3.69914 | 2.40246 | 3.25317 | 4.03815 | 2.82948 | 3.80946 | 2.74837 | 2.80240 | 2.43938 | 2.81613 | 3.33047 | 5.45016 | 3.42912 | 241 | a | - | - | - |
|     | 2.68618 | 4.42225 | 2.77519 | 2.73123 | 3.46354 | 2.40513 | 3.72494 | 3.29354 | 2.67741 | 2.69355 | 4.24690 | 2.90347 | 2.73739 | 3.18146 | 2.89801 | 2.37887 | 2.77519 | 2.98518 | 4.58477 | 3.61503 |     |   |   |   |   |
|     | 0.02334 | 4.16489 | 4.88723 | 0.61958 | 0.77255 | 0.48576 | 0.95510 |         |         |         |         |         |         |         |         |         |         |         |         |         |     |   |   |   |   |
| 221 | 1.97374 | 4.60005 | 3.04212 | 2.41061 | 3.83171 | 3.45548 | 3.72534 | 3.20123 | 2.59151 | 2.61915 | 3.72641 | 3.08028 | 3.86725 | 2.92864 | 3.02232 | 2.37845 | 2.69717 | 2.68239 | 5.17992 | 3.88894 | 242 | a | - | - | - |
|     | 2.68618 | 4.42225 | 2.77519 | 2.73123 | 3.46354 | 2.40513 | 3.72494 | 3.29354 | 2.67741 | 2.69355 | 4.24690 | 2.90347 | 2.73739 | 3.18146 | 2.89801 | 2.37887 | 2.77519 | 2.98518 | 4.58477 | 3.61503 |     |   |   |   |   |
|     | 0.02334 | 4.16489 | 4.88723 | 0.61958 | 0.77255 | 0.48576 | 0.95510 |         |         |         |         |         |         |         |         |         |         |         |         |         |     |   |   |   |   |
| 222 | 2.63264 | 4.67071 | 2.92426 | 2.31862 | 4.19313 | 1.45437 | 3.91805 | 3.53181 | 2.79005 | 3.23356 | 4.10395 | 3.10164 | 3.88932 | 3.12577 | 3.19675 | 2.72453 | 2.97154 | 2.72422 | 5.51387 | 4.20965 | 243 | g | - | - | - |
|     | 2.68618 | 4.42225 | 2.77519 | 2.73123 | 3.46354 | 2.40513 | 3.72494 | 3.29354 | 2.67741 | 2.69355 | 4.24690 | 2.90347 | 2.73739 | 3.18146 | 2.89801 | 2.37887 | 2.77519 | 2.98518 | 4.58477 | 3.61503 |     |   |   |   |   |
|     | 0.02334 | 4.16489 | 4.88723 | 0.61958 | 0.77255 | 0.48576 | 0.95510 |         |         |         |         |         |         |         |         |         |         |         |         |         |     |   |   |   |   |
| 223 | 2.79816 | 5.02571 | 3.18701 | 2.58241 | 4.35980 | 3.55050 | 3.64031 | 3.75737 | 1.65019 | 2.85938 | 4.10367 | 3.06592 | 3.28927 | 2.77249 | 1.94257 | 2.70747 | 3.00680 | 3.41792 | 5.43559 | 4.15505 | 244 | k | - | - | - |
|     | 2.68618 | 4.42225 | 2.77519 | 2.73123 | 3.46354 | 2.40513 | 3.72494 | 3.29354 | 2.67741 | 2.69355 | 4.24690 | 2.90347 | 2.73739 | 3.18146 | 2.89801 | 2.37887 | 2.77519 | 2.98518 | 4.58477 | 3.61503 |     |   |   |   |   |
|     | 0.02334 | 4.16489 | 4.88723 | 0.61958 | 0.77255 | 0.48576 | 0.95510 |         |         |         |         |         |         |         |         |         |         |         |         |         |     |   |   |   |   |
| 224 | 2.17714 | 4.43695 | 2.83156 | 1.99748 | 4.22802 | 3.14678 | 3.61813 | 3.66808 | 2.18723 | 3.22672 | 4.01215 | 2.91272 | 3.45546 | 2.74447 | 2.86482 | 2.61500 | 2.84886 | 3.20939 | 5.42632 | 4.06098 | 245 | e | - | - | - |
|     | 2.68618 | 4.42225 | 2.77519 | 2.73123 | 3.46354 | 2.40513 | 3.72494 | 3.29354 | 2.67741 | 2.69355 | 4.24690 | 2.90347 | 2.73739 | 3.18146 | 2.89801 | 2.37887 | 2.77519 | 2.98518 | 4.58477 | 3.61503 |     |   |   |   |   |
|     | 0.02334 | 4.16489 | 4.88723 | 0.61958 | 0.77255 | 0.48576 | 0.95510 |         |         |         |         |         |         |         |         |         |         |         |         |         |     |   |   |   |   |
| 225 | 2.81751 | 5.32678 | 1.71911 | 1.67260 | 4.62108 | 3.11659 | 3.22906 | 4.11547 | 2.57803 | 3.36760 | 4.40505 | 2.80643 | 3.85876 | 2.84654 | 3.10870 | 2.74846 | 3.07162 | 3.69786 | 5.76975 | 4.32444 | 246 | e | - | - | - |
|     | 2.68618 | 4.42225 | 2.77519 | 2.73123 | 3.46354 | 2.40513 | 3.72494 | 3.29354 | 2.67741 | 2.69355 | 4.24690 | 2.90347 | 2.73739 | 3.18146 | 2.89801 | 2.37887 | 2.77519 | 2.98518 | 4.58477 | 3.61503 |     |   |   |   |   |
|     | 0.02334 | 4.16489 | 4.88723 | 0.61958 | 0.77255 | 0.48576 | 0.95510 |         |         |         |         |         |         |         |         |         |         |         |         |         |     |   |   |   |   |
| 226 | 2.75787 | 5.20973 | 2.31458 | 1.49837 | 4.52763 | 3.35569 | 3.68970 | 4.00051 | 2.51938 | 3.51562 | 4.30225 | 2.83585 | 3.84438 | 2.81976 | 2.90174 | 2.37392 | 2.75919 | 3.59358 | 5.68216 | 4.26345 | 247 | e | - | - | - |
|     | 2.68618 | 4.42225 | 2.77519 | 2.73123 | 3.46354 | 2.40513 | 3.72494 | 3.29354 | 2.67741 | 2.69355 | 4.24690 | 2.90347 | 2.73739 | 3.18146 | 2.89801 | 2.37887 | 2.77519 | 2.98518 | 4.58477 | 3.61503 |     |   |   |   |   |
|     | 0.02334 | 4.16489 | 4.88723 | 0.61958 | 0.77255 | 0.48576 | 0.95510 |         |         |         |         |         |         |         |         |         |         |         |         |         |     |   |   |   |   |
| 227 | 2.63824 | 4.42710 | 3.94210 | 3.42251 | 3.34265 | 3.85280 | 4.20865 | 2.50182 | 3.24690 | 1.18161 | 3.24728 | 3.74647 | 4.24279 | 3.20227 | 3.50023 | 3.17410 | 3.10052 | 2.27105 | 5.04189 | 3.85133 | 248 | l | - | - | - |
|     | 2.68618 | 4.42225 | 2.77519 | 2.73123 | 3.46354 | 2.40513 | 3.72495 | 3.29354 | 2.67741 | 2.69355 | 4.24690 | 2.90347 | 2.73740 | 3.18146 | 2.89801 | 2.37887 | 2.77520 | 2.98518 | 4.58477 | 3.61503 |     |   |   |   |   |
|     | 0.04227 | 3.38577 | 4.88723 | 0.53555 | 0.88031 | 0.48576 | 0.95510 |         |         |         |         |         |         |         |         |         |         |         |         |         |     |   |   |   |   |
| 228 | 3.12420 | 4.43323 | 4.89684 | 4.35263 | 2.52233 | 4.44298 | 4.82600 | 1.27588 | 4.23495 | 1.93931 | 3.23665 | 4.51614 | 4.71530 | 4.39641 | 4.35858 | 3.79378 | 3.36568 | 1.50571 | 5.23782 | 4.03045 | 250 | i | - | - | - |
|     | 2.68618 | 4.42225 | 2.77519 | 2.73123 | 3.46354 | 2.40513 | 3.72494 | 3.29354 | 2.67741 | 2.69355 | 4.24690 | 2.90347 | 2.73739 | 3.18146 | 2.89801 | 2.37887 | 2.77519 | 2.98518 | 4.58477 | 3.61503 |     |   |   |   |   |
|     | 0.02334 | 4.16489 | 4.88723 | 0.61958 | 0.77255 | 0.48576 | 0.95510 |         |         |         |         |         |         |         |         |         |         |         |         |         |     |   |   |   |   |
| 229 | 2.44070 | 4.48262 | 3.16595 | 2.78499 | 4.29452 | 2.56450 | 3.97966 | 3.72339 | 2.86029 | 3.35269 | 4.16616 | 2.67710 | 3.80183 | 3.17617 | 3.27175 | 1.79918 | 1.80295 | 3.26562 | 5.58547 | 4.30172 | 251 | s | - | - | - |
|     | 2.68618 | 4.42225 | 2.77519 | 2.73123 | 3.46354 | 2.40513 | 3.72494 | 3.29354 | 2.67741 | 2.69355 | 4.24690 | 2.90347 | 2.73739 | 3.18146 | 2.89801 | 2.37887 | 2.77519 | 2.98518 | 4.58477 | 3.61503 |     |   |   |   |   |
|     | 0.02334 | 4.16489 | 4.88723 | 0.61958 | 0.77255 | 0.48576 | 0.95510 |         |         |         |         |         |         |         |         |         |         |         |         |         |     |   |   |   |   |
| 230 | 2.29683 | 5.03696 | 2.25409 | 2.34004 | 4.38843 | 3.00395 | 3.67360 | 3.84468 | 2.27609 | 3.38516 | 4.17083 | 2.88165 | 2.45700 | 2.80378 | 2.97213 | 2.61719 | 2.92804 | 3.45028 | 5.56926 | 4.18102 | 252 | d | - | - | - |
|     | 2.68618 | 4.42225 | 2.77519 | 2.73123 | 3.46354 | 2.40513 | 3.72494 | 3.29354 | 2.67741 | 2.69355 | 4.24690 | 2.90347 | 2.73739 | 3.18146 | 2.89801 | 2.37887 | 2.77519 | 2.98518 | 4.58477 | 3.61503 |     |   |   |   |   |
|     | 0.02334 | 4.16489 | 4.88723 | 0.61958 | 0.77255 | 0.48576 | 0.95510 |         |         |         |         |         |         |         |         |         |         |         |         |         |     |   |   |   |   |
| 231 | 2.57489 | 4.85418 | 2.68342 | 2.38004 | 4.10659 | 2.86403 | 3.62825 | 3.53058 | 2.33357 | 2.85503 | 3.43632 | 2.94477 | 3.81761 | 2.47373 | 2.88248 | 2.62922 | 2.48239 | 3.08890 | 5.34772 | 4.00209 | 253 | k | - | - | - |
|     | 2.68618 | 4.42225 | 2.77519 | 2.73123 | 3.46354 | 2.40513 | 3.72494 | 3.29354 | 2.67741 | 2.69355 | 4.24690 | 2.90347 | 2.73739 | 3.18146 | 2.89801 | 2.37887 | 2.77519 | 2.98518 | 4.58477 | 3.61503 |     |   |   |   |   |
|     | 0.02334 | 4.16489 | 4.88723 | 0.61958 | 0.77255 | 0.48576 | 0.95510 |         |         |         |         |         |         |         |         |         |         |         |         |         |     |   |   |   |   |
| 232 | 3.04300 | 5.58218 | 1.00083 | 2.01699 | 4.89826 | 3.29697 | 3.87826 | 4.38775 | 2.92389 | 3.92182 | 4.79267 | 2.77300 | 3.93706 | 3.05250 | 3.52760 | 2.93001 | 3.09710 | 3.96803 | 6.09825 | 4.58593 | 254 | d | - | - | - |
|     | 2.68618 | 4.42225 | 2.77519 | 2.73123 | 3.46354 | 2.40513 | 3.72494 | 3.29354 | 2.67741 | 2.69355 | 4.24690 | 2.90347 | 2.73739 | 3.18146 | 2.89801 | 2.37887 | 2.77519 | 2.98518 | 4.58477 | 3.61503 |     |   |   |   |   |
|     | 0.02334 | 4.16489 | 4.88723 | 0.61958 | 0.77255 | 0.48576 | 0.95510 |         |         |         |         |         |         |         |         |         |         |         |         |         |     |   |   |   |   |
| 233 | 3.04501 | 5.23814 | 3.45332 | 2.77471 | 4.68827 | 3.70266 | 3.65117 | 4.03639 | 1.44832 | 3.47251 | 4.31534 | 3.20347 | 4.05926 | 2.59755 | 1.51255 | 3.02958 | 2.93103 | 3.69909 | 5.52528 | 4.33193 | 255 | k | - | - | - |
|     | 2.68618 | 4.42225 | 2.77519 | 2.73123 | 3.46354 | 2.40513 | 3.72494 | 3.29354 | 2.67741 | 2.69355 | 4.24690 | 2.90347 | 2.73739 | 3.18146 | 2.89801 | 2.37887 | 2.77519 | 2.98518 | 4.58477 | 3.61503 |     |   |   |   |   |
|     | 0.02334 | 4.16489 | 4.88723 | 0.61958 | 0.77255 | 0.48576 | 0.95510 |         |         |         |         |         |         |         |         |         |         |         |         |         |     |   |   |   |   |
| 234 | 2.80407 | 5.08653 | 3.15536 | 2.55294 | 4.43757 | 3.54547 | 3.62692 | 3.84210 | 1.68248 | 3.16798 | 4.15196 | 3.04388 | 3.92213 | 2.21513 | 2.18046 | 2.79611 | 2.53009 | 3.48594 | 5.47382 | 4.18471 | 256 | k | - | - | - |
|     | 2.68618 | 4.42225 | 2.77519 | 2.73123 | 3.46354 | 2.40513 | 3.72494 | 3.29354 | 2.67741 | 2.69355 | 4.24690 | 2.90347 | 2.73739 | 3.18146 | 2.89801 | 2.37887 | 2.77519 | 2.98518 | 4.58477 | 3.61503 |     |   |   |   |   |
|     | 0.02334 | 4.16489 | 4.88723 | 0.61958 | 0.77255 | 0.48576 | 0.95510 |         |         |         |         |         |         |         |         |         |         |         |         |         |     |   |   |   |   |
| 235 | 3.12639 | 4.42914 | 4.91189 | 4.36147 | 2.80193 | 4.46290 | 4.86007 | 1.54555 | 4.24678 | 1.78514 | 3.23296 | 4.53258 | 4.72551 | 4.40806 | 4.37118 | 3.81087 | 3.36511 | 1.24930 | 5.27973 | 4.10620 | 257 | v | - | - | - |
|     | 2.68618 | 4.42225 | 2.77519 | 2.73123 | 3.46354 | 2.40513 | 3.72494 | 3.29354 | 2.67741 | 2.69355 | 4.24690 | 2.90347 | 2.73739 | 3.18146 | 2.89801 | 2.37887 | 2.77519 | 2.98518 | 4.58477 | 3.61503 |     |   |   |   |   |
|     | 0.02334 | 4.16489 | 4.88723 | 0.61958 | 0.77255 | 0.48576 | 0.95510 |         |         |         |         |         |         |         |         |         |         |         |         |         |     |   |   |   |   |
| 236 | 1.62996 | 2.70737 | 3.92842 | 3.54934 | 4.21993 | 1.44030 | 4.41175 | 3.58372 | 3.49481 | 3.32326 | 4.16533 | 3.53232 | 3.77707 | 3.75040 | 3.74624 | 2.39438 | 2.74756 | 3.08739 | 5.61708 | 4.44443 | 258 | g | - | - | - |
|     | 2.68618 | 4.42225 | 2.77519 | 2.73123 | 3.46354 | 2.40513 | 3.72494 | 3.29354 | 2.67741 | 2.69355 | 4.24690 | 2.90347 | 2.73739 | 3.18146 | 2.89801 | 2.37887 | 2.77519 | 2.98518 | 4.58477 | 3.61503 |     |   |   |   |   |
|     | 0.02334 | 4.16489 | 4.88723 | 0.61958 | 0.      |         |         |         |         |         |         |         |         |         |         |         |         |         |         |         |     |   |   |   |   |



|     |         |         |         |         |         |         |         |         |         |         |         |         |         |         |         |         |         |         |         |         |     |   |   |   |   |
|-----|---------|---------|---------|---------|---------|---------|---------|---------|---------|---------|---------|---------|---------|---------|---------|---------|---------|---------|---------|---------|-----|---|---|---|---|
| 264 | 3.43734 | 4.74801 | 5.00420 | 4.47935 | 3.17954 | 4.69483 | 5.02483 | 1.84448 | 4.29201 | 0.79547 | 2.98979 | 4.73411 | 4.88240 | 4.44072 | 4.40886 | 4.08174 | 3.67011 | 2.23084 | 5.29594 | 4.18426 | 286 | l | - | - | - |
|     | 2.68618 | 4.42225 | 2.77519 | 2.73123 | 3.46354 | 2.40513 | 3.72494 | 3.29354 | 2.67741 | 2.69355 | 4.24690 | 2.90347 | 2.73739 | 3.18146 | 2.89801 | 2.37887 | 2.77519 | 2.98518 | 4.58477 | 3.61503 |     |   |   |   |   |
|     | 0.02334 | 4.16489 | 4.88723 | 0.61958 | 0.77255 | 0.48576 | 0.95510 |         |         |         |         |         |         |         |         |         |         |         |         |         |     |   |   |   |   |
| 265 | 3.15245 | 5.12453 | 3.13482 | 2.90531 | 4.33089 | 3.58519 | 4.06225 | 4.01824 | 2.70785 | 3.48982 | 4.52006 | 3.36365 | 4.14957 | 0.79098 | 2.98153 | 3.19274 | 3.45419 | 3.73260 | 5.55451 | 4.27303 | 287 | q | - | - | - |
|     | 2.68618 | 4.42225 | 2.77519 | 2.73123 | 3.46354 | 2.40513 | 3.72494 | 3.29354 | 2.67741 | 2.69355 | 4.24690 | 2.90347 | 2.73739 | 3.18146 | 2.89801 | 2.37887 | 2.77519 | 2.98518 | 4.58477 | 3.61503 |     |   |   |   |   |
|     | 0.02334 | 4.16489 | 4.88723 | 0.61958 | 0.77255 | 0.48576 | 0.95510 |         |         |         |         |         |         |         |         |         |         |         |         |         |     |   |   |   |   |
| 266 | 1.68418 | 4.84313 | 2.89841 | 2.19950 | 4.18044 | 3.40401 | 3.72339 | 3.56997 | 2.28227 | 3.18882 | 4.01773 | 2.99226 | 3.86615 | 2.88492 | 2.92619 | 2.70882 | 2.64479 | 3.23570 | 5.42905 | 4.10342 | 288 | a | - | - | - |
|     | 2.68618 | 4.42225 | 2.77519 | 2.73123 | 3.46354 | 2.40513 | 3.72494 | 3.29354 | 2.67741 | 2.69355 | 4.24690 | 2.90347 | 2.73739 | 3.18146 | 2.89801 | 2.37887 | 2.77519 | 2.98518 | 4.58477 | 3.61503 |     |   |   |   |   |
|     | 0.02334 | 4.16489 | 4.88723 | 0.61958 | 0.77255 | 0.48576 | 0.95510 |         |         |         |         |         |         |         |         |         |         |         |         |         |     |   |   |   |   |
| 267 | 2.37749 | 4.31552 | 3.46584 | 3.24397 | 4.45839 | 1.15648 | 4.35841 | 3.83287 | 3.33814 | 3.55957 | 4.41172 | 3.41743 | 3.82428 | 3.63791 | 3.63860 | 2.55406 | 1.88550 | 3.29978 | 5.78732 | 4.58611 | 289 | g | - | - | - |
|     | 2.68618 | 4.42225 | 2.77519 | 2.73123 | 3.46354 | 2.40513 | 3.72494 | 3.29354 | 2.67741 | 2.69355 | 4.24690 | 2.90347 | 2.73739 | 3.18146 | 2.89801 | 2.37887 | 2.77519 | 2.98518 | 4.58477 | 3.61503 |     |   |   |   |   |
|     | 0.02334 | 4.16489 | 4.88723 | 0.61958 | 0.77255 | 0.48576 | 0.95510 |         |         |         |         |         |         |         |         |         |         |         |         |         |     |   |   |   |   |
| 268 | 2.62025 | 4.42342 | 3.37467 | 2.80658 | 3.10686 | 3.55552 | 3.78307 | 2.93870 | 2.40562 | 1.93814 | 3.52157 | 3.08430 | 3.93774 | 3.06411 | 2.78307 | 2.79926 | 2.58384 | 2.70322 | 4.98406 | 3.73477 | 290 | l | - | - | - |
|     | 2.68618 | 4.42225 | 2.77519 | 2.73123 | 3.46354 | 2.40513 | 3.72494 | 3.29354 | 2.67741 | 2.69355 | 4.24690 | 2.90347 | 2.73739 | 3.18146 | 2.89801 | 2.37887 | 2.77519 | 2.98518 | 4.58477 | 3.61503 |     |   |   |   |   |
|     | 0.02334 | 4.16489 | 4.88723 | 0.61958 | 0.77255 | 0.48576 | 0.95510 |         |         |         |         |         |         |         |         |         |         |         |         |         |     |   |   |   |   |
| 269 | 2.60152 | 4.33814 | 3.03873 | 2.88416 | 3.46298 | 3.57380 | 3.82265 | 2.71822 | 2.83801 | 2.20281 | 2.72522 | 3.29772 | 3.95266 | 2.71705 | 3.19762 | 2.81699 | 2.83309 | 2.40258 | 4.91313 | 3.04454 | 291 | l | - | - | - |
|     | 2.68618 | 4.42225 | 2.77519 | 2.73123 | 3.46354 | 2.40513 | 3.72494 | 3.29354 | 2.67741 | 2.69355 | 4.24690 | 2.90347 | 2.73739 | 3.18146 | 2.89801 | 2.37887 | 2.77519 | 2.98518 | 4.58477 | 3.61503 |     |   |   |   |   |
|     | 0.02334 | 4.16489 | 4.88723 | 0.61958 | 0.77255 | 0.48576 | 0.95510 |         |         |         |         |         |         |         |         |         |         |         |         |         |     |   |   |   |   |
| 270 | 2.72180 | 5.00920 | 2.72603 | 2.46681 | 4.28699 | 3.47780 | 3.63196 | 3.73280 | 2.05602 | 3.27240 | 4.07642 | 2.98051 | 3.87325 | 2.76401 | 1.79205 | 2.72047 | 2.94303 | 3.38036 | 5.43290 | 3.18915 | 292 | r | - | - | - |
|     | 2.68618 | 4.42225 | 2.77519 | 2.73123 | 3.46354 | 2.40513 | 3.72494 | 3.29354 | 2.67741 | 2.69355 | 4.24690 | 2.90347 | 2.73739 | 3.18146 | 2.89801 | 2.37887 | 2.77519 | 2.98518 | 4.58477 | 3.61503 |     |   |   |   |   |
|     | 0.25017 | 4.16489 | 1.58085 | 0.61958 | 0.77255 | 0.48576 | 0.95510 |         |         |         |         |         |         |         |         |         |         |         |         |         |     |   |   |   |   |
| 271 | 2.14129 | 4.25120 | 3.20186 | 2.86726 | 4.19979 | 1.84223 | 4.01321 | 3.59634 | 2.93730 | 3.26942 | 4.09760 | 3.15677 | 2.57113 | 3.24516 | 3.30446 | 2.42274 | 2.31754 | 3.11623 | 5.52303 | 4.27638 | 293 | g | - | - | - |
|     | 2.68618 | 4.42225 | 2.77519 | 2.73123 | 3.46354 | 2.40513 | 3.72494 | 3.29354 | 2.67741 | 2.69355 | 4.24690 | 2.90347 | 2.73739 | 3.18146 | 2.89801 | 2.37887 | 2.77519 | 2.98518 | 4.58477 | 3.61503 |     |   |   |   |   |
|     | 0.02920 | 3.94392 | 4.66626 | 0.61958 | 0.77255 | 0.37059 | 1.17225 |         |         |         |         |         |         |         |         |         |         |         |         |         |     |   |   |   |   |
| 272 | 2.89529 | 4.32842 | 4.35194 | 3.78052 | 3.26434 | 4.05371 | 4.38186 | 1.43316 | 3.65198 | 1.73710 | 2.66771 | 4.02470 | 3.40820 | 3.87824 | 3.84301 | 3.35960 | 3.13001 | 2.13682 | 5.00194 | 3.83920 | 294 | i | - | - | - |
|     | 2.68618 | 4.42225 | 2.77519 | 2.73123 | 3.46354 | 2.40513 | 3.72494 | 3.29354 | 2.67741 | 2.69355 | 4.24690 | 2.90347 | 2.73739 | 3.18146 | 2.89801 | 2.37887 | 2.77519 | 2.98518 | 4.58477 | 3.61503 |     |   |   |   |   |
|     | 0.02334 | 4.16489 | 4.88723 | 0.61958 | 0.77255 | 0.48576 | 0.95510 |         |         |         |         |         |         |         |         |         |         |         |         |         |     |   |   |   |   |
| 273 | 2.64729 | 5.05981 | 2.62691 | 2.20786 | 4.36921 | 3.40138 | 3.60624 | 3.82679 | 1.88939 | 2.97950 | 4.11455 | 2.75726 | 3.80836 | 2.54325 | 2.81860 | 2.62447 | 2.54624 | 3.43189 | 5.50915 | 4.12543 | 295 | k | - | - | - |
|     | 2.68618 | 4.42225 | 2.77519 | 2.73123 | 3.46354 | 2.40513 | 3.72494 | 3.29354 | 2.67741 | 2.69355 | 4.24690 | 2.90347 | 2.73739 | 3.18146 | 2.89801 | 2.37887 | 2.77519 | 2.98518 | 4.58477 | 3.61503 |     |   |   |   |   |
|     | 0.02334 | 4.16489 | 4.88723 | 0.61958 | 0.77255 | 0.48576 | 0.95510 |         |         |         |         |         |         |         |         |         |         |         |         |         |     |   |   |   |   |
| 274 | 2.47092 | 4.43750 | 3.34708 | 2.81916 | 3.70412 | 3.44195 | 3.83845 | 3.07980 | 2.74484 | 2.52455 | 3.65775 | 3.23135 | 1.87686 | 3.10169 | 3.11381 | 2.56006 | 2.74732 | 2.81290 | 4.63505 | 3.84220 | 296 | p | - | - | - |
|     | 2.68618 | 4.42225 | 2.77519 | 2.73123 | 3.46354 | 2.40513 | 3.72494 | 3.29354 | 2.67741 | 2.69355 | 4.24690 | 2.90347 | 2.73739 | 3.18146 | 2.89801 | 2.37887 | 2.77519 | 2.98518 | 4.58477 | 3.61503 |     |   |   |   |   |
|     | 0.02334 | 4.16489 | 4.88723 | 0.61958 | 0.77255 | 0.48576 | 0.95510 |         |         |         |         |         |         |         |         |         |         |         |         |         |     |   |   |   |   |
| 275 | 2.77920 | 4.28229 | 4.05608 | 3.48113 | 3.25305 | 3.86658 | 4.13489 | 1.82600 | 2.88957 | 1.53154 | 3.21738 | 3.76369 | 4.21479 | 3.60606 | 3.52137 | 3.15791 | 3.00968 | 2.28967 | 4.87633 | 3.44002 | 297 | l | - | - | - |
|     | 2.68618 | 4.42241 | 2.77532 | 2.73091 | 3.46341 | 2.40513 | 3.72511 | 3.29362 | 2.67757 | 2.69371 | 4.24706 | 3.03063 | 2.73725 | 3.18163 | 2.89817 | 2.77444 | 2.98512 | 4.58493 | 3.61520 |         |     |   |   |   |   |
|     | 0.24478 | 1.56264 | 4.88723 | 1.35746 | 0.29748 | 0.48576 | 0.95510 |         |         |         |         |         |         |         |         |         |         |         |         |         |     |   |   |   |   |
| 276 | 2.56297 | 5.13083 | 2.65480 | 1.95412 | 4.44058 | 2.82257 | 3.63991 | 3.90801 | 2.35906 | 3.42277 | 4.19625 | 2.73933 | 2.64911 | 2.48380 | 2.92041 | 2.65589 | 2.93112 | 3.50542 | 5.58707 | 4.18434 | 304 | e | - | - | - |
|     | 2.68618 | 4.42225 | 2.77519 | 2.73123 | 3.46354 | 2.40513 | 3.72494 | 3.29354 | 2.67741 | 2.69355 | 4.24690 | 2.90347 | 2.73739 | 3.18146 | 2.89801 | 2.37887 | 2.77519 | 2.98518 | 4.58477 | 3.61503 |     |   |   |   |   |
|     | 0.02334 | 4.16489 | 4.88723 | 0.61958 | 0.77255 | 0.48576 | 0.95510 |         |         |         |         |         |         |         |         |         |         |         |         |         |     |   |   |   |   |
| 277 | 2.59463 | 4.22730 | 3.62960 | 2.95346 | 3.34864 | 3.61285 | 3.87993 | 2.59749 | 2.84012 | 2.33504 | 2.62556 | 3.41676 | 2.99773 | 3.27551 | 3.29623 | 2.87072 | 2.82643 | 2.08885 | 4.82143 | 3.17248 | 305 | v | - | - | - |
|     | 2.68618 | 4.42225 | 2.77519 | 2.73123 | 3.46354 | 2.40513 | 3.72494 | 3.29354 | 2.67741 | 2.69355 | 4.24690 | 2.90347 | 2.73739 | 3.18146 | 2.89801 | 2.37887 | 2.77519 | 2.98518 | 4.58477 | 3.61503 |     |   |   |   |   |
|     | 0.02334 | 4.16489 | 4.88723 | 0.61958 | 0.77255 | 0.48576 | 0.95510 |         |         |         |         |         |         |         |         |         |         |         |         |         |     |   |   |   |   |
| 278 | 2.59699 | 5.04532 | 2.68977 | 1.93716 | 4.41731 | 2.75460 | 3.69442 | 3.87582 | 2.51253 | 3.41608 | 4.20554 | 2.57557 | 2.48278 | 2.82845 | 3.00556 | 2.44272 | 2.95008 | 3.47699 | 5.60030 | 4.21013 | 306 | e | - | - | - |
|     | 2.68618 | 4.42225 | 2.77519 | 2.73123 | 3.46354 | 2.40513 | 3.72494 | 3.29354 | 2.67741 | 2.69355 | 4.24690 | 2.90347 | 2.73739 | 3.18146 | 2.89801 | 2.37887 | 2.77519 | 2.98518 | 4.58477 | 3.61503 |     |   |   |   |   |
|     | 0.02334 | 4.16489 | 4.88723 | 0.61958 | 0.77255 | 0.48576 | 0.95510 |         |         |         |         |         |         |         |         |         |         |         |         |         |     |   |   |   |   |
| 279 | 2.24010 | 4.97640 | 2.89602 | 2.21512 | 4.26488 | 3.41284 | 3.20484 | 3.70629 | 2.15831 | 3.25585 | 4.04140 | 2.91185 | 2.79306 | 2.67282 | 2.83386 | 2.53419 | 2.87048 | 3.27396 | 5.44663 | 4.08170 | 307 | k | - | - | - |
|     | 2.68618 | 4.42225 | 2.77519 | 2.73123 | 3.46354 | 2.40513 | 3.72494 | 3.29354 | 2.67741 | 2.69355 | 4.24690 | 2.90347 | 2.73739 | 3.18146 | 2.89801 | 2.37887 | 2.77519 | 2.98518 | 4.58477 | 3.61503 |     |   |   |   |   |
|     | 0.02334 | 4.16489 | 4.88723 | 0.61958 | 0.77255 | 0.48576 | 0.95510 |         |         |         |         |         |         |         |         |         |         |         |         |         |     |   |   |   |   |
| 280 | 2.27880 | 4.88127 | 2.93033 | 2.23406 | 4.16685 | 3.02287 | 3.47124 | 3.59742 | 2.39724 | 3.17561 | 3.97408 | 2.93594 | 3.19346 | 2.77683 | 2.84659 | 2.40824 | 2.40796 | 3.24689 | 5.39390 | 4.04181 | 308 | e | - | - | - |
|     | 2.68618 | 4.42225 | 2.77519 | 2.73123 | 3.46354 | 2.40513 | 3.72494 | 3.29354 | 2.67741 | 2.69355 | 4.24690 | 2.90347 | 2.73739 | 3.18146 | 2.89801 | 2.37887 | 2.77519 | 2.98518 | 4.58477 | 3.61503 |     |   |   |   |   |
|     | 0.02334 | 4.16489 | 4.88723 | 0.61958 | 0.77255 | 0.48576 | 0.95510 |         |         |         |         |         |         |         |         |         |         |         |         |         |     |   |   |   |   |
| 281 | 2.59337 | 4.32826 | 3.45112 | 2.88482 | 3.04928 | 3.56497 | 3.81946 | 2.71433 | 2.83432 | 2.25619 | 3.43137 | 3.29530 | 3.66126 | 2.86089 | 3.10163 | 2.66956 | 2.13281 | 2.53541 | 4.91014 | 3.67303 | 309 | t | - | - | - |
|     | 2.68618 | 4.42225 | 2.77519 | 2.      |         |         |         |         |         |         |         |         |         |         |         |         |         |         |         |         |     |   |   |   |   |





|     |         |         |         |         |         |         |         |         |         |         |         |         |         |         |         |         |         |         |         |         |     |   |   |   |   |
|-----|---------|---------|---------|---------|---------|---------|---------|---------|---------|---------|---------|---------|---------|---------|---------|---------|---------|---------|---------|---------|-----|---|---|---|---|
| 331 | 2.56062 | 5.04896 | 2.65796 | 2.06001 | 4.35346 | 2.86952 | 3.60444 | 3.81375 | 2.24430 | 3.33862 | 4.11009 | 2.63967 | 3.79285 | 2.64884 | 2.86643 | 2.54304 | 2.45086 | 3.34317 | 5.51009 | 4.11868 | 359 | e | - | - | - |
|     | 2.68618 | 4.42225 | 2.77519 | 2.73123 | 3.46354 | 2.40513 | 3.72494 | 3.29354 | 2.67741 | 2.69355 | 4.24690 | 2.90347 | 2.73739 | 3.18146 | 2.89801 | 2.37887 | 2.77519 | 2.98518 | 4.58477 | 3.61503 |     |   |   |   |   |
|     | 0.02464 | 4.11150 | 4.83384 | 0.61958 | 0.77255 | 0.54742 | 0.86379 |         |         |         |         |         |         |         |         |         |         |         |         |         |     |   |   |   |   |
| 332 | 2.66968 | 5.04890 | 2.10088 | 2.31132 | 4.35237 | 3.36186 | 3.64122 | 3.80417 | 2.44260 | 3.34804 | 4.13564 | 2.28995 | 3.81076 | 2.50728 | 2.93405 | 2.64813 | 2.67426 | 2.97428 | 5.53404 | 4.14414 | 360 | d | - | - | - |
|     | 2.68618 | 4.42225 | 2.77519 | 2.73123 | 3.46354 | 2.40513 | 3.72494 | 3.29354 | 2.67741 | 2.69355 | 4.24690 | 2.90347 | 2.73739 | 3.18146 | 2.89801 | 2.37887 | 2.77519 | 2.98518 | 4.58477 | 3.61503 |     |   |   |   |   |
|     | 0.02464 | 4.11150 | 4.83384 | 0.61958 | 0.77255 | 0.54742 | 0.86379 |         |         |         |         |         |         |         |         |         |         |         |         |         |     |   |   |   |   |
| 333 | 2.66859 | 5.13788 | 2.45802 | 2.10313 | 4.45625 | 3.20188 | 3.61016 | 3.93039 | 2.08538 | 3.42991 | 4.19385 | 2.55728 | 3.79797 | 2.48632 | 2.87343 | 2.62835 | 2.45764 | 3.51568 | 5.58068 | 4.17304 | 361 | k | - | - | - |
|     | 2.68615 | 4.42230 | 2.77524 | 2.73128 | 3.46359 | 2.40518 | 3.72499 | 3.29359 | 2.67746 | 2.69360 | 4.24695 | 2.90325 | 2.73737 | 3.18151 | 2.89806 | 2.37892 | 2.77524 | 2.98523 | 4.58237 | 3.61508 |     |   |   |   |   |
|     | 0.18832 | 1.80975 | 4.83384 | 0.66562 | 0.72146 | 0.54742 | 0.86379 |         |         |         |         |         |         |         |         |         |         |         |         |         |     |   |   |   |   |
| 334 | 2.43294 | 4.64510 | 3.04592 | 2.44612 | 4.03297 | 3.34532 | 3.72900 | 3.43934 | 2.56087 | 3.06760 | 3.89310 | 2.89807 | 2.69595 | 2.90332 | 3.00251 | 2.22091 | 2.26281 | 2.94394 | 5.32730 | 4.01670 | 364 | s | - | - | - |
|     | 2.68618 | 4.42225 | 2.77519 | 2.73123 | 3.46354 | 2.40513 | 3.72494 | 3.29354 | 2.67741 | 2.69355 | 4.24690 | 2.90347 | 2.73739 | 3.18146 | 2.89801 | 2.37887 | 2.77519 | 2.98518 | 4.58477 | 3.61503 |     |   |   |   |   |
|     | 0.02464 | 4.11150 | 4.83384 | 0.61958 | 0.77255 | 0.54742 | 0.86379 |         |         |         |         |         |         |         |         |         |         |         |         |         |     |   |   |   |   |
| 335 | 2.67184 | 5.10290 | 2.20986 | 2.19134 | 4.41332 | 2.54719 | 3.62869 | 3.87987 | 2.29982 | 3.39988 | 4.17511 | 2.59260 | 3.80313 | 2.75019 | 2.92570 | 2.48015 | 2.78322 | 3.29419 | 5.56911 | 4.16597 | 365 | e | - | - | - |
|     | 2.68618 | 4.42225 | 2.77519 | 2.73123 | 3.46354 | 2.40513 | 3.72494 | 3.29354 | 2.67741 | 2.69355 | 4.24690 | 2.90347 | 2.73739 | 3.18146 | 2.89801 | 2.37887 | 2.77519 | 2.98518 | 4.58477 | 3.61503 |     |   |   |   |   |
|     | 0.02464 | 4.11150 | 4.83384 | 0.61958 | 0.77255 | 0.44905 | 1.01676 |         |         |         |         |         |         |         |         |         |         |         |         |         |     |   |   |   |   |
| 336 | 2.78257 | 4.36350 | 3.82816 | 3.30680 | 1.98467 | 3.75420 | 3.78966 | 2.86603 | 3.23329 | 2.53547 | 3.49553 | 3.57704 | 3.46956 | 3.48250 | 3.50111 | 2.53573 | 3.02434 | 2.66511 | 4.37097 | 1.91300 | 366 | y | - | - | - |
|     | 2.68618 | 4.42225 | 2.77519 | 2.73123 | 3.46354 | 2.40513 | 3.72494 | 3.29354 | 2.67741 | 2.69355 | 4.24690 | 2.90347 | 2.73739 | 3.18146 | 2.89801 | 2.37887 | 2.77519 | 2.98518 | 4.58477 | 3.61503 |     |   |   |   |   |
|     | 0.02334 | 4.16489 | 4.88723 | 0.61958 | 0.77255 | 0.48576 | 0.95510 |         |         |         |         |         |         |         |         |         |         |         |         |         |     |   |   |   |   |
| 337 | 2.66453 | 4.56919 | 3.40174 | 3.24140 | 4.60581 | 2.40736 | 4.42860 | 4.12193 | 3.40658 | 3.76559 | 4.64762 | 3.51668 | 0.83785 | 3.72363 | 3.70871 | 2.82122 | 3.13902 | 3.59824 | 5.80480 | 4.68224 | 367 | p | - | - | - |
|     | 2.68618 | 4.42225 | 2.77519 | 2.73123 | 3.46354 | 2.40513 | 3.72494 | 3.29354 | 2.67741 | 2.69355 | 4.24690 | 2.90347 | 2.73739 | 3.18146 | 2.89801 | 2.37887 | 2.77519 | 2.98518 | 4.58477 | 3.61503 |     |   |   |   |   |
|     | 0.02334 | 4.16489 | 4.88723 | 0.61958 | 0.77255 | 0.48576 | 0.95510 |         |         |         |         |         |         |         |         |         |         |         |         |         |     |   |   |   |   |
| 338 | 2.95717 | 5.54735 | 1.52290 | 1.52211 | 4.84057 | 3.31907 | 3.78808 | 4.35462 | 2.37701 | 3.83149 | 4.64958 | 2.77073 | 3.90072 | 2.93669 | 3.29238 | 2.85019 | 3.22833 | 3.91783 | 5.97928 | 4.48837 | 368 | e | - | - | - |
|     | 2.68618 | 4.42225 | 2.77519 | 2.73123 | 3.46354 | 2.40513 | 3.72494 | 3.29354 | 2.67741 | 2.69355 | 4.24690 | 2.90347 | 2.73739 | 3.18146 | 2.89801 | 2.37887 | 2.77519 | 2.98518 | 4.58477 | 3.61503 |     |   |   |   |   |
|     | 0.17761 | 4.16489 | 1.91599 | 0.61958 | 0.77255 | 0.48576 | 0.95510 |         |         |         |         |         |         |         |         |         |         |         |         |         |     |   |   |   |   |
| 339 | 2.70767 | 4.93219 | 1.78204 | 2.34256 | 3.96986 | 3.33864 | 3.68422 | 3.63542 | 2.59397 | 3.22916 | 4.07721 | 2.87760 | 3.83643 | 2.88091 | 3.07840 | 2.43562 | 2.96906 | 3.30221 | 5.31886 | 2.74808 | 369 | d | - | - | - |
|     | 2.68618 | 4.42225 | 2.77519 | 2.73123 | 3.46354 | 2.40513 | 3.72494 | 3.29354 | 2.67741 | 2.69355 | 4.24690 | 2.90347 | 2.73739 | 3.18146 | 2.89801 | 2.37887 | 2.77519 | 2.98518 | 4.58477 | 3.61503 |     |   |   |   |   |
|     | 0.02719 | 4.01447 | 4.73681 | 0.61958 | 0.77255 | 0.64348 | 0.74541 |         |         |         |         |         |         |         |         |         |         |         |         |         |     |   |   |   |   |
| 340 | 2.63108 | 4.49795 | 2.84175 | 2.71688 | 3.60808 | 3.52135 | 3.76197 | 2.79141 | 2.63867 | 1.83883 | 3.55029 | 3.17288 | 3.91758 | 3.01239 | 2.71746 | 2.78112 | 2.86641 | 2.70779 | 5.04390 | 3.76977 | 370 | l | - | - | - |
|     | 2.68618 | 4.42225 | 2.77519 | 2.73123 | 3.46354 | 2.40513 | 3.72494 | 3.29354 | 2.67741 | 2.69355 | 4.24690 | 2.90347 | 2.73739 | 3.18146 | 2.89801 | 2.37887 | 2.77519 | 2.98518 | 4.58477 | 3.61503 |     |   |   |   |   |
|     | 0.02719 | 4.01447 | 4.73681 | 0.61958 | 0.77255 | 0.39844 | 1.11282 |         |         |         |         |         |         |         |         |         |         |         |         |         |     |   |   |   |   |
| 341 | 3.23958 | 4.57657 | 4.85251 | 4.30356 | 3.28696 | 4.50963 | 4.89316 | 2.06166 | 4.15832 | 1.09903 | 2.91127 | 4.54206 | 4.75391 | 4.33421 | 4.30726 | 3.86277 | 3.47819 | 1.49218 | 5.29843 | 4.18324 | 371 | l | - | - | - |
|     | 2.68618 | 4.42225 | 2.77519 | 2.73123 | 3.46354 | 2.40513 | 3.72494 | 3.29354 | 2.67741 | 2.69355 | 4.24690 | 2.90347 | 2.73739 | 3.18146 | 2.89801 | 2.37887 | 2.77519 | 2.98518 | 4.58477 | 3.61503 |     |   |   |   |   |
|     | 0.02334 | 4.16489 | 4.88723 | 0.61958 | 0.77255 | 0.48576 | 0.95510 |         |         |         |         |         |         |         |         |         |         |         |         |         |     |   |   |   |   |
| 342 | 1.71415 | 4.78043 | 2.90976 | 2.52036 | 4.25719 | 3.33004 | 3.77458 | 3.67921 | 2.34412 | 3.27844 | 4.09612 | 2.28076 | 3.84535 | 2.93736 | 3.00433 | 2.38971 | 2.91610 | 3.30199 | 5.50012 | 4.17220 | 372 | a | - | - | - |
|     | 2.68618 | 4.42225 | 2.77519 | 2.73123 | 3.46354 | 2.40513 | 3.72494 | 3.29354 | 2.67741 | 2.69355 | 4.24690 | 2.90347 | 2.73739 | 3.18146 | 2.89801 | 2.37887 | 2.77519 | 2.98518 | 4.58477 | 3.61503 |     |   |   |   |   |
|     | 0.07803 | 4.16489 | 2.82128 | 0.61958 | 0.77255 | 0.48576 | 0.95510 |         |         |         |         |         |         |         |         |         |         |         |         |         |     |   |   |   |   |
| 343 | 2.90163 | 5.46990 | 1.79737 | 1.69304 | 4.77375 | 2.27398 | 3.75585 | 4.28616 | 2.70892 | 3.77104 | 4.58390 | 2.39025 | 3.86602 | 2.90620 | 3.28320 | 2.80350 | 3.17455 | 3.85054 | 5.92726 | 4.43994 | 373 | e | - | - | - |
|     | 2.68618 | 4.42225 | 2.77519 | 2.73123 | 3.46354 | 2.40513 | 3.72494 | 3.29354 | 2.67741 | 2.69355 | 4.24690 | 2.90347 | 2.73739 | 3.18146 | 2.89801 | 2.37887 | 2.77519 | 2.98518 | 4.58477 | 3.61503 |     |   |   |   |   |
|     | 0.02464 | 4.11150 | 4.83384 | 0.61958 | 0.77255 | 0.54742 | 0.86379 |         |         |         |         |         |         |         |         |         |         |         |         |         |     |   |   |   |   |
| 344 | 2.69659 | 5.15931 | 2.46673 | 1.94188 | 4.47674 | 2.53458 | 3.62670 | 3.94893 | 2.33220 | 3.45031 | 4.22181 | 2.64460 | 3.81063 | 2.74491 | 2.41044 | 2.65366 | 2.93588 | 3.53796 | 5.60274 | 4.19605 | 374 | e | - | - | - |
|     | 2.68618 | 4.42225 | 2.77519 | 2.73123 | 3.46354 | 2.40513 | 3.72494 | 3.29354 | 2.67741 | 2.69355 | 4.24690 | 2.90347 | 2.73739 | 3.18146 | 2.89801 | 2.37887 | 2.77519 | 2.98518 | 4.58477 | 3.61503 |     |   |   |   |   |
|     | 0.02464 | 4.11150 | 4.83384 | 0.61958 | 0.77255 | 0.54742 | 0.86379 |         |         |         |         |         |         |         |         |         |         |         |         |         |     |   |   |   |   |
| 345 | 2.47484 | 4.78137 | 2.72036 | 2.19450 | 4.36368 | 1.61395 | 3.84607 | 3.79093 | 2.72435 | 3.39681 | 4.22636 | 2.97118 | 3.04793 | 3.02496 | 3.17679 | 2.67619 | 2.96402 | 3.38532 | 5.62067 | 4.28118 | 375 | g | - | - | - |
|     | 2.68618 | 4.42225 | 2.77519 | 2.73123 | 3.46354 | 2.40513 | 3.72494 | 3.29354 | 2.67741 | 2.69355 | 4.24690 | 2.90347 | 2.73739 | 3.18146 | 2.89801 | 2.37887 | 2.77519 | 2.98518 | 4.58477 | 3.61503 |     |   |   |   |   |
|     | 0.02464 | 4.11150 | 4.83384 | 0.61958 | 0.77255 | 0.44905 | 1.01676 |         |         |         |         |         |         |         |         |         |         |         |         |         |     |   |   |   |   |
| 346 | 3.39551 | 4.69922 | 5.03687 | 4.46688 | 3.15638 | 4.68758 | 5.00134 | 1.96706 | 4.33602 | 0.85379 | 2.51339 | 4.71972 | 4.84444 | 4.41042 | 4.43644 | 4.03782 | 3.61408 | 2.15321 | 5.26723 | 4.23298 | 376 | l | - | - | - |
|     | 2.68618 | 4.42225 | 2.77519 | 2.73123 | 3.46354 | 2.40513 | 3.72494 | 3.29354 | 2.67741 | 2.69355 | 4.24690 | 2.90347 | 2.73739 | 3.18146 | 2.89801 | 2.37887 | 2.77519 | 2.98518 | 4.58477 | 3.61503 |     |   |   |   |   |
|     | 0.06167 | 4.16489 | 3.11731 | 0.61958 | 0.77255 | 0.48576 | 0.95510 |         |         |         |         |         |         |         |         |         |         |         |         |         |     |   |   |   |   |
| 347 | 2.63348 | 4.90161 | 2.94701 | 2.30787 | 4.17766 | 3.42268 | 3.62342 | 3.37462 | 2.09544 | 3.17509 | 3.97640 | 2.93893 | 3.82293 | 2.53279 | 2.80877 | 2.17330 | 2.43787 | 3.25660 | 5.38509 | 4.04138 | 377 | k | - | - | - |
|     | 2.68618 | 4.42225 | 2.77519 | 2.73123 | 3.46354 | 2.40513 | 3.72494 | 3.29354 | 2.67741 | 2.69355 | 4.24690 | 2.90347 | 2.73739 | 3.18146 | 2.89801 | 2.37887 | 2.77519 | 2.98518 | 4.58477 | 3.61503 |     |   |   |   |   |
|     | 0.07522 | 4.12746 | 2.87641 | 0.61958 | 0.77255 | 0.52972 | 0.88860 |         |         |         |         |         |         |         |         |         |         |         |         |         |     |   |   |   |   |
| 348 | 3.14518 | 4.45420 | 4.83341 | 4.30724 | 3.49441 | 4.50104 | 4.97819 | 1.64254 | 4.19181 | 1.72710 | 3.30260 | 4.53990 | 4.77356 | 4.42583 | 4.37897 | 3.86668 | 3.39598 | 1.09004 | 5.46112 | 4.28151 | 378 | v | - | - | - |
|     | 2.68618 | 4.42225 | 2.77519 |         |         |         |         |         |         |         |         |         |         |         |         |         |         |         |         |         |     |   |   |   |   |





|     |         |         |         |         |         |         |         |         |         |         |         |         |         |         |         |         |         |         |         |         |     |   |   |   |   |  |
|-----|---------|---------|---------|---------|---------|---------|---------|---------|---------|---------|---------|---------|---------|---------|---------|---------|---------|---------|---------|---------|-----|---|---|---|---|--|
| 398 | 2.77658 | 4.77953 | 3.01377 | 2.83061 | 4.53001 | 0.99389 | 4.10136 | 3.99878 | 2.38685 | 3.61723 | 4.49608 | 3.25002 | 3.97622 | 3.32497 | 3.21076 | 2.86797 | 3.16603 | 3.56846 | 5.72096 | 4.48781 | 429 | g | - | - | - |  |
|     | 2.68618 | 4.42225 | 2.77519 | 2.73123 | 3.46354 | 2.40513 | 3.72494 | 3.29354 | 2.67741 | 2.69355 | 4.24690 | 2.90347 | 2.73739 | 3.18146 | 2.89801 | 2.37887 | 2.77519 | 2.98518 | 4.58477 | 3.61503 |     |   |   |   |   |  |
|     | 0.02334 | 4.16489 | 4.88723 | 0.61958 | 0.77255 | 0.48576 | 0.95510 |         |         |         |         |         |         |         |         |         |         |         |         |         |     |   |   |   |   |  |
| 399 | 2.56527 | 4.99296 | 2.92373 | 2.40176 | 4.32064 | 3.13417 | 3.62604 | 3.76155 | 2.01496 | 3.29835 | 4.08245 | 2.28053 | 3.82726 | 2.74889 | 2.54083 | 2.57592 | 2.51486 | 3.38343 | 5.47367 | 4.11604 | 430 | k | - | - | - |  |
|     | 2.68618 | 4.42225 | 2.77519 | 2.73123 | 3.46354 | 2.40513 | 3.72494 | 3.29354 | 2.67741 | 2.69355 | 4.24690 | 2.90347 | 2.73739 | 3.18146 | 2.89801 | 2.37887 | 2.77519 | 2.98518 | 4.58477 | 3.61503 |     |   |   |   |   |  |
|     | 0.02334 | 4.16489 | 4.88723 | 0.61958 | 0.77255 | 0.48576 | 0.95510 |         |         |         |         |         |         |         |         |         |         |         |         |         |     |   |   |   |   |  |
| 400 | 3.36714 | 5.16534 | 3.89059 | 3.35258 | 4.59608 | 3.78529 | 4.08066 | 4.16726 | 2.41459 | 3.63009 | 4.63119 | 3.68530 | 4.28143 | 3.29398 | 0.61106 | 3.44264 | 3.61809 | 3.88059 | 5.56480 | 4.46945 | 431 | R | - | - | - |  |
|     | 2.68618 | 4.42225 | 2.77519 | 2.73123 | 3.46354 | 2.40513 | 3.72494 | 3.29354 | 2.67741 | 2.69355 | 4.24690 | 2.90347 | 2.73739 | 3.18146 | 2.89801 | 2.37887 | 2.77519 | 2.98518 | 4.58477 | 3.61503 |     |   |   |   |   |  |
|     | 0.02334 | 4.16489 | 4.88723 | 0.61958 | 0.77255 | 0.48576 | 0.95510 |         |         |         |         |         |         |         |         |         |         |         |         |         |     |   |   |   |   |  |
| 401 | 2.71354 | 4.70248 | 3.18462 | 2.66455 | 2.89627 | 3.55288 | 3.67725 | 3.29418 | 2.62187 | 2.90793 | 3.79516 | 2.77266 | 3.94662 | 1.89334 | 3.02973 | 2.79506 | 2.94527 | 3.02705 | 4.84813 | 2.70469 | 432 | q | - | - | - |  |
|     | 2.68618 | 4.42225 | 2.77519 | 2.73123 | 3.46354 | 2.40513 | 3.72494 | 3.29354 | 2.67741 | 2.69355 | 4.24690 | 2.90347 | 2.73739 | 3.18146 | 2.89801 | 2.37887 | 2.77519 | 2.98518 | 4.58477 | 3.61503 |     |   |   |   |   |  |
|     | 0.02334 | 4.16489 | 4.88723 | 0.61958 | 0.77255 | 0.48576 | 0.95510 |         |         |         |         |         |         |         |         |         |         |         |         |         |     |   |   |   |   |  |
| 402 | 2.37260 | 4.21657 | 4.13385 | 3.31046 | 3.32523 | 3.87997 | 4.20452 | 1.62336 | 3.45472 | 2.13282 | 2.60919 | 3.82092 | 4.23423 | 3.70290 | 3.67580 | 3.17204 | 2.98306 | 1.98871 | 4.92425 | 3.73206 | 433 | i | - | - | - |  |
|     | 2.68618 | 4.42225 | 2.77519 | 2.73123 | 3.46354 | 2.40513 | 3.72494 | 3.29354 | 2.67741 | 2.69355 | 4.24690 | 2.90347 | 2.73739 | 3.18146 | 2.89801 | 2.37887 | 2.77519 | 2.98518 | 4.58477 | 3.61503 |     |   |   |   |   |  |
|     | 0.02334 | 4.16489 | 4.88723 | 0.61958 | 0.77255 | 0.48576 | 0.95510 |         |         |         |         |         |         |         |         |         |         |         |         |         |     |   |   |   |   |  |
| 403 | 2.36649 | 4.15375 | 3.85747 | 3.28633 | 3.28713 | 3.66471 | 3.98252 | 2.23976 | 3.19615 | 2.34974 | 3.27961 | 3.57368 | 4.04913 | 3.45634 | 3.44843 | 2.65293 | 2.67197 | 1.82721 | 4.79075 | 2.94955 | 434 | v | - | - | - |  |
|     | 2.68618 | 4.42225 | 2.77519 | 2.73123 | 3.46354 | 2.40513 | 3.72494 | 3.29354 | 2.67741 | 2.69355 | 4.24690 | 2.90347 | 2.73739 | 3.18146 | 2.89801 | 2.37887 | 2.77519 | 2.98518 | 4.58477 | 3.61503 |     |   |   |   |   |  |
|     | 0.02334 | 4.16489 | 4.88723 | 0.61958 | 0.77255 | 0.48576 | 0.95510 |         |         |         |         |         |         |         |         |         |         |         |         |         |     |   |   |   |   |  |
| 404 | 2.20659 | 4.79341 | 2.99312 | 2.06242 | 4.04292 | 3.43202 | 3.65754 | 3.45294 | 2.45869 | 3.06362 | 3.22274 | 2.97772 | 3.83466 | 2.62350 | 2.91333 | 2.45532 | 2.62269 | 3.13294 | 5.31319 | 3.98360 | 435 | e | - | - | - |  |
|     | 2.68618 | 4.42225 | 2.77519 | 2.73123 | 3.46354 | 2.40513 | 3.72494 | 3.29354 | 2.67741 | 2.69355 | 4.24690 | 2.90347 | 2.73739 | 3.18146 | 2.89801 | 2.37887 | 2.77519 | 2.98518 | 4.58477 | 3.61503 |     |   |   |   |   |  |
|     | 0.02334 | 4.16489 | 4.88723 | 0.61958 | 0.77255 | 0.48576 | 0.95510 |         |         |         |         |         |         |         |         |         |         |         |         |         |     |   |   |   |   |  |
| 405 | 3.11766 | 4.43704 | 4.86305 | 4.36257 | 3.68284 | 4.46205 | 5.06230 | 1.06812 | 4.25285 | 2.22276 | 3.48513 | 4.56161 | 4.79115 | 4.51824 | 4.44650 | 3.84538 | 3.10662 | 1.34646 | 5.60394 | 4.40391 | 436 | i | - | - | - |  |
|     | 2.68584 | 4.42227 | 2.77522 | 2.73126 | 3.46356 | 2.40515 | 3.72497 | 3.29356 | 2.67743 | 2.69357 | 4.24692 | 2.90349 | 2.73742 | 3.18149 | 2.89803 | 2.37889 | 2.77522 | 2.98521 | 4.58479 | 3.61505 |     |   |   |   |   |  |
|     | 0.17761 | 1.86314 | 4.88723 | 0.28412 | 1.39707 | 0.48576 | 0.95510 |         |         |         |         |         |         |         |         |         |         |         |         |         |     |   |   |   |   |  |
| 406 | 2.81943 | 5.16940 | 1.38350 | 2.30147 | 4.72783 | 2.12943 | 3.87622 | 4.22821 | 2.85793 | 3.76540 | 4.59088 | 2.85146 | 3.88271 | 3.04413 | 3.41076 | 2.39303 | 3.15196 | 3.76572 | 5.93577 | 4.49275 | 438 | d | - | - | - |  |
|     | 2.68618 | 4.42225 | 2.77519 | 2.73123 | 3.46354 | 2.40513 | 3.72494 | 3.29354 | 2.67741 | 2.69355 | 4.24690 | 2.90347 | 2.73739 | 3.18146 | 2.89801 | 2.37887 | 2.77519 | 2.98518 | 4.58477 | 3.61503 |     |   |   |   |   |  |
|     | 0.02334 | 4.16489 | 4.88723 | 0.61958 | 0.77255 | 0.48576 | 0.95510 |         |         |         |         |         |         |         |         |         |         |         |         |         |     |   |   |   |   |  |
| 407 | 1.72311 | 4.66258 | 2.98879 | 2.62701 | 4.26818 | 2.24006 | 3.86460 | 3.68635 | 2.68695 | 3.30416 | 4.13158 | 3.07640 | 3.84297 | 2.22496 | 3.09979 | 2.64745 | 2.90742 | 3.28726 | 5.53511 | 4.22677 | 439 | a | - | - | - |  |
|     | 2.68618 | 4.42225 | 2.77519 | 2.73123 | 3.46354 | 2.40513 | 3.72494 | 3.29354 | 2.67741 | 2.69355 | 4.24690 | 2.90347 | 2.73739 | 3.18146 | 2.89801 | 2.37887 | 2.77519 | 2.98518 | 4.58477 | 3.61503 |     |   |   |   |   |  |
|     | 0.02334 | 4.16489 | 4.88723 | 0.61958 | 0.77255 | 0.48576 | 0.95510 |         |         |         |         |         |         |         |         |         |         |         |         |         |     |   |   |   |   |  |
| 408 | 2.38473 | 4.31932 | 3.64540 | 3.10847 | 2.94836 | 3.60162 | 3.98369 | 2.32819 | 3.04900 | 2.43377 | 3.43133 | 3.46391 | 2.00782 | 3.34823 | 3.37244 | 2.89444 | 2.90143 | 2.47621 | 4.96803 | 3.72078 | 440 | p | - | - | - |  |
|     | 2.68618 | 4.42225 | 2.77519 | 2.73123 | 3.46354 | 2.40513 | 3.72494 | 3.29354 | 2.67741 | 2.69355 | 4.24690 | 2.90347 | 2.73739 | 3.18146 | 2.89801 | 2.37887 | 2.77519 | 2.98518 | 4.58477 | 3.61503 |     |   |   |   |   |  |
|     | 0.02334 | 4.16489 | 4.88723 | 0.61958 | 0.77255 | 0.48576 | 0.95510 |         |         |         |         |         |         |         |         |         |         |         |         |         |     |   |   |   |   |  |
| 409 | 3.17097 | 4.52311 | 4.78279 | 4.28345 | 3.45331 | 4.42313 | 4.92731 | 1.94913 | 4.12989 | 1.47753 | 3.29641 | 4.50129 | 4.74454 | 4.38174 | 4.30640 | 3.80913 | 3.43621 | 1.10531 | 5.41299 | 4.21765 | 441 | v | - | - | - |  |
|     | 2.68618 | 4.42225 | 2.77519 | 2.73123 | 3.46354 | 2.40513 | 3.72494 | 3.29354 | 2.67741 | 2.69355 | 4.24690 | 2.90347 | 2.73739 | 3.18146 | 2.89801 | 2.37887 | 2.77519 | 2.98518 | 4.58477 | 3.61503 |     |   |   |   |   |  |
|     | 0.02334 | 4.16489 | 4.88723 | 0.61958 | 0.77255 | 0.48576 | 0.95510 |         |         |         |         |         |         |         |         |         |         |         |         |         |     |   |   |   |   |  |
| 410 | 3.21519 | 4.52199 | 4.95395 | 4.48240 | 3.61695 | 4.55899 | 5.18177 | 0.91562 | 4.35212 | 2.08201 | 3.42136 | 4.68265 | 4.87603 | 4.61649 | 4.53265 | 3.97083 | 3.48890 | 1.53802 | 5.63704 | 4.43195 | 442 | i | - | - | - |  |
|     | 2.68618 | 4.42225 | 2.77519 | 2.73123 | 3.46354 | 2.40513 | 3.72494 | 3.29354 | 2.67741 | 2.69355 | 4.24690 | 2.90347 | 2.73739 | 3.18146 | 2.89801 | 2.37887 | 2.77519 | 2.98518 | 4.58477 | 3.61503 |     |   |   |   |   |  |
|     | 0.02334 | 4.16489 | 4.88723 | 0.61958 | 0.77255 | 0.48576 | 0.95510 |         |         |         |         |         |         |         |         |         |         |         |         |         |     |   |   |   |   |  |
| 411 | 3.18863 | 4.88603 | 3.82888 | 3.71728 | 4.67093 | 3.55752 | 4.76170 | 4.30328 | 3.80198 | 3.89323 | 4.96207 | 3.98991 | 0.42795 | 4.18131 | 4.00541 | 3.36743 | 3.65485 | 3.91304 | 5.76614 | 4.79867 | 443 | P | - | - | - |  |
|     | 2.68618 | 4.42225 | 2.77519 | 2.73123 | 3.46354 | 2.40513 | 3.72494 | 3.29354 | 2.67741 | 2.69355 | 4.24690 | 2.90347 | 2.73739 | 3.18146 | 2.89801 | 2.37887 | 2.77519 | 2.98518 | 4.58477 | 3.61503 |     |   |   |   |   |  |
|     | 0.02334 | 4.16489 | 4.88723 | 0.61958 | 0.77255 | 0.48576 | 0.95510 |         |         |         |         |         |         |         |         |         |         |         |         |         |     |   |   |   |   |  |
| 412 | 2.64450 | 4.86403 | 3.01421 | 2.39446 | 4.14453 | 3.44444 | 3.64649 | 3.58820 | 1.91225 | 3.14451 | 3.95518 | 2.98057 | 3.84470 | 2.79019 | 2.69571 | 2.20476 | 2.54197 | 2.87870 | 5.36474 | 4.03639 | 444 | k | - | - | - |  |
|     | 2.68618 | 4.42225 | 2.77519 | 2.73123 | 3.46354 | 2.40513 | 3.72494 | 3.29354 | 2.67741 | 2.69355 | 4.24690 | 2.90347 | 2.73739 | 3.18146 | 2.89801 | 2.37887 | 2.77519 | 2.98518 | 4.58477 | 3.61503 |     |   |   |   |   |  |
|     | 0.02334 | 4.16489 | 4.88723 | 0.61958 | 0.77255 | 0.48576 | 0.95510 |         |         |         |         |         |         |         |         |         |         |         |         |         |     |   |   |   |   |  |
| 413 | 3.65633 | 4.97487 | 4.64261 | 4.42152 | 0.63212 | 4.25844 | 4.04309 | 3.15482 | 4.32396 | 2.46101 | 3.84666 | 4.36241 | 4.71705 | 4.41299 | 4.37075 | 3.90466 | 3.96096 | 3.16555 | 4.22202 | 2.55920 | 445 | F | - | - | - |  |
|     | 2.68618 | 4.42225 | 2.77519 | 2.73123 | 3.46354 | 2.40513 | 3.72494 | 3.29354 | 2.67741 | 2.69355 | 4.24690 | 2.90347 | 2.73739 | 3.18146 | 2.89801 | 2.37887 | 2.77519 | 2.98518 | 4.58477 | 3.61503 |     |   |   |   |   |  |
|     | 0.02334 | 4.16489 | 4.88723 | 0.61958 | 0.77255 | 0.48576 | 0.95510 |         |         |         |         |         |         |         |         |         |         |         |         |         |     |   |   |   |   |  |
| 414 | 2.59866 | 4.47107 | 3.26822 | 2.42388 | 3.63518 | 2.97544 | 3.75239 | 2.52765 | 2.67636 | 2.60644 | 3.10412 | 2.85305 | 3.90325 | 2.86354 | 3.07839 | 2.74826 | 2.83042 | 2.45596 | 5.03241 | 3.76881 | 446 | e | - | - | - |  |
|     | 2.68618 | 4.42225 | 2.77519 | 2.73123 | 3.46354 | 2.40513 | 3.72494 | 3.29354 | 2.67741 | 2.69355 | 4.24690 | 2.90347 | 2.73739 | 3.18146 | 2.89801 | 2.37887 | 2.77519 | 2.98518 | 4.58477 | 3.61503 |     |   |   |   |   |  |
|     | 0.02334 | 4.16489 | 4.88723 | 0.61958 | 0.77255 | 0.48576 | 0.95510 |         |         |         |         |         |         |         |         |         |         |         |         |         |     |   |   |   |   |  |
| 415 | 1.53830 | 4.13433 | 3.18399 | 2.90743 | 4.14210 | 2.19765 | 4.03609 | 3.51700 | 2.99740 |         |         |         |         |         |         |         |         |         |         |         |     |   |   |   |   |  |

CKSUM 1819627275

STATS LOCAL MSV -11.0699 0.70271

STATS LOCAL VITERBI -11.7000 0.70271

STATS LOCAL FORWARD -5.5153 0.70271

HMM

|       | A       | C       | D       | E       | F       | G       | H       | I       | K       | L       | M       | N       | P       | Q       | R       | S       | T       | V       | W       | Y       |
|-------|---------|---------|---------|---------|---------|---------|---------|---------|---------|---------|---------|---------|---------|---------|---------|---------|---------|---------|---------|---------|
|       | m->m    | m->i    | m->d    | i->m    | i->i    | d->m    | d->d    |         |         |         |         |         |         |         |         |         |         |         |         |         |
| COMPO | 2.53527 | 4.42005 | 3.21194 | 2.80239 | 2.91962 | 2.99124 | 3.63706 | 2.66894 | 2.93420 | 2.34697 | 3.43547 | 3.27359 | 3.42625 | 3.25323 | 3.08554 | 2.79326 | 2.80424 | 2.52518 | 3.71308 | 3.08016 |
|       | 2.68618 | 4.42225 | 2.77519 | 2.73123 | 3.46354 | 2.40513 | 3.72494 | 3.29354 | 2.67741 | 2.69355 | 4.24690 | 2.90347 | 2.73739 | 3.18146 | 2.89801 | 2.37887 | 2.77519 | 2.98518 | 4.58477 | 3.61503 |
|       | 0.02666 | 4.03368 | 4.75603 | 0.61958 | 0.77255 | 0.00000 | *       |         |         |         |         |         |         |         |         |         |         |         |         |         |
| 1     | 3.10282 | 4.62768 | 4.22590 | 3.83428 | 3.28796 | 3.95614 | 4.53220 | 2.48008 | 3.59269 | 1.86074 | 1.09964 | 4.09103 | 4.42003 | 3.96536 | 3.77853 | 3.46749 | 3.41256 | 2.50432 | 5.14866 | 3.92331 |
|       | 2.68618 | 4.42225 | 2.77519 | 2.73123 | 3.46354 | 2.40513 | 3.72494 | 3.29354 | 2.67741 | 2.69355 | 4.24690 | 2.90347 | 2.73739 | 3.18146 | 2.89801 | 2.37887 | 2.77519 | 2.98518 | 4.58477 | 3.61503 |
|       | 0.02666 | 4.03368 | 4.75603 | 0.61958 | 0.77255 | 0.48576 | 0.95510 |         |         |         |         |         |         |         |         |         |         |         |         |         |
| 2     | 1.16312 | 4.22670 | 3.33571 | 3.06090 | 4.24759 | 2.99995 | 4.16937 | 3.63393 | 3.13312 | 3.35086 | 4.19138 | 3.02976 | 3.72798 | 3.43715 | 3.45697 | 2.03203 | 2.75133 | 3.13824 | 5.59990 | 4.36531 |
|       | 2.68618 | 4.42225 | 2.77519 | 2.73123 | 3.46354 | 2.40513 | 3.72494 | 3.29354 | 2.67741 | 2.69355 | 4.24690 | 2.90347 | 2.73739 | 3.18146 | 2.89801 | 2.37887 | 2.77519 | 2.98518 | 4.58477 | 3.61503 |
|       | 0.02666 | 4.03368 | 4.75603 | 0.61958 | 0.77255 | 0.48576 | 0.95510 |         |         |         |         |         |         |         |         |         |         |         |         |         |
| 3     | 2.18129 | 4.74642 | 2.95690 | 2.40235 | 4.02303 | 3.38734 | 3.64218 | 3.43191 | 2.43934 | 2.94064 | 3.86615 | 2.67725 | 3.80607 | 2.44578 | 2.88373 | 2.51906 | 2.53701 | 3.04506 | 5.29321 | 3.96852 |
|       | 2.68618 | 4.42225 | 2.77519 | 2.73123 | 3.46354 | 2.40513 | 3.72494 | 3.29354 | 2.67741 | 2.69355 | 4.24690 | 2.90347 | 2.73739 | 3.18146 | 2.89801 | 2.37887 | 2.77519 | 2.98518 | 4.58477 | 3.61503 |
|       | 0.02666 | 4.03368 | 4.75603 | 0.61958 | 0.77255 | 0.48576 | 0.95510 |         |         |         |         |         |         |         |         |         |         |         |         |         |
| 4     | 2.40526 | 4.52790 | 3.13553 | 2.40671 | 3.74567 | 3.44496 | 3.72897 | 2.95752 | 2.59871 | 2.78372 | 3.65991 | 3.09577 | 3.86428 | 2.95271 | 3.00254 | 2.70564 | 1.95330 | 2.80874 | 5.11920 | 3.54074 |
|       | 2.68618 | 4.42225 | 2.77519 | 2.73123 | 3.46354 | 2.40513 | 3.72494 | 3.29354 | 2.67741 | 2.69355 | 4.24690 | 2.90347 | 2.73739 | 3.18146 | 2.89801 | 2.37887 | 2.77519 | 2.98518 | 4.58477 | 3.61503 |
|       | 0.02666 | 4.03368 | 4.75603 | 0.61958 | 0.77255 | 0.48576 | 0.95510 |         |         |         |         |         |         |         |         |         |         |         |         |         |
| 5     | 2.59111 | 4.54133 | 3.30717 | 2.84761 | 4.05213 | 3.33394 | 3.86326 | 3.38181 | 2.52914 | 3.06206 | 3.96705 | 3.22045 | 3.88236 | 3.07774 | 2.28777 | 2.71991 | 1.49505 | 3.06283 | 5.34719 | 4.09831 |
|       | 2.68618 | 4.42225 | 2.77519 | 2.73123 | 3.46354 | 2.40513 | 3.72494 | 3.29354 | 2.67741 | 2.69355 | 4.24690 | 2.90347 | 2.73739 | 3.18146 | 2.89801 | 2.37887 | 2.77519 | 2.98518 | 4.58477 | 3.61503 |
|       | 0.02666 | 4.03368 | 4.75603 | 0.61958 | 0.77255 | 0.48576 | 0.95510 |         |         |         |         |         |         |         |         |         |         |         |         |         |
| 6     | 2.50899 | 4.77052 | 2.84292 | 1.97848 | 4.01204 | 3.40131 | 3.62556 | 3.10398 | 2.43218 | 3.03136 | 3.85211 | 2.93977 | 3.80405 | 2.65364 | 2.89069 | 2.59388 | 2.58737 | 2.84607 | 5.28473 | 3.95285 |
|       | 2.68618 | 4.42225 | 2.77519 | 2.73123 | 3.46354 | 2.40513 | 3.72494 | 3.29354 | 2.67741 | 2.69355 | 4.24690 | 2.90347 | 2.73739 | 3.18146 | 2.89801 | 2.37887 | 2.77519 | 2.98518 | 4.58477 | 3.61503 |
|       | 0.09795 | 4.03368 | 2.58240 | 0.61958 | 0.77255 | 0.48576 | 0.95510 |         |         |         |         |         |         |         |         |         |         |         |         |         |
| 7     | 2.29650 | 4.80172 | 2.88376 | 2.32122 | 4.06556 | 3.37854 | 3.23149 | 3.48159 | 2.27641 | 3.07764 | 3.89562 | 2.91647 | 3.79501 | 2.67719 | 2.82511 | 2.30454 | 2.57998 | 3.15407 | 5.31170 | 3.98024 |
|       | 2.68574 | 4.42236 | 2.77518 | 2.73127 | 3.46365 | 2.40513 | 3.72506 | 3.29365 | 2.67752 | 2.69366 | 4.24630 | 2.90358 | 2.73739 | 3.18158 | 2.89806 | 2.37888 | 2.77506 | 2.98514 | 4.58488 | 3.61514 |
|       | 0.29435 | 1.40338 | 4.68668 | 1.07800 | 4.01593 | 0.44468 | 1.02451 |         |         |         |         |         |         |         |         |         |         |         |         |         |
| 8     | 2.02422 | 4.20322 | 3.70960 | 3.20053 | 3.59484 | 2.98068 | 4.07016 | 2.48607 | 3.13519 | 2.59002 | 3.53888 | 3.47547 | 3.94783 | 3.43146 | 3.43929 | 2.76233 | 2.62846 | 1.68904 | 5.09056 | 3.87375 |
|       | 2.68618 | 4.42225 | 2.77519 | 2.73123 | 3.46354 | 2.40513 | 3.72494 | 3.29354 | 2.67741 | 2.69355 | 4.24690 | 2.90347 | 2.73739 | 3.18146 | 2.89801 | 2.37887 | 2.77519 | 2.98518 | 4.58477 | 3.61503 |
|       | 0.02666 | 4.03368 | 4.75603 | 0.61958 | 0.77255 | 0.48576 | 0.95510 |         |         |         |         |         |         |         |         |         |         |         |         |         |
| 9     | 2.43024 | 4.71966 | 3.00442 | 2.47961 | 4.07347 | 2.80476 | 3.65926 | 3.48645 | 2.09317 | 3.09045 | 3.90649 | 2.97419 | 3.79791 | 2.81583 | 2.76845 | 2.28895 | 2.55417 | 3.02337 | 5.32683 | 4.00693 |
|       | 2.68618 | 4.42225 | 2.77519 | 2.73123 | 3.46354 | 2.40513 | 3.72494 | 3.29354 | 2.67741 | 2.69355 | 4.24690 | 2.90347 | 2.73739 | 3.18146 | 2.89801 | 2.37887 | 2.77519 | 2.98518 | 4.58477 | 3.61503 |
|       | 0.02666 | 4.03368 | 4.75603 | 0.61958 | 0.77255 | 0.48576 | 0.95510 |         |         |         |         |         |         |         |         |         |         |         |         |         |
| 10    | 2.00859 | 4.32235 | 3.39925 | 2.83796 | 3.49224 | 3.34996 | 3.79346 | 2.56328 | 2.77344 | 2.40273 | 3.44499 | 3.25074 | 3.90925 | 2.99741 | 2.98040 | 2.76560 | 2.66997 | 2.44470 | 4.92776 | 3.68799 |
|       | 2.68618 | 4.42225 | 2.77519 | 2.73123 | 3.46354 | 2.40513 | 3.72494 | 3.29354 | 2.67741 | 2.69355 | 4.24690 | 2.90347 | 2.73739 | 3.18146 | 2.89801 | 2.37887 | 2.77519 | 2.98518 | 4.58477 | 3.61503 |
|       | 0.02666 | 4.03368 | 4.75603 | 0.61958 | 0.77255 | 0.48576 | 0.95510 |         |         |         |         |         |         |         |         |         |         |         |         |         |
| 11    | 2.13353 | 4.66834 | 2.64300 | 2.42570 | 3.91262 | 3.40574 | 3.65921 | 3.15273 | 2.49429 | 2.78831 | 3.78018 | 2.98812 | 3.81624 | 2.83555 | 2.94280 | 2.33829 | 2.81445 | 2.83952 | 5.22457 | 3.91152 |
|       | 2.68618 | 4.42225 | 2.77519 | 2.73123 | 3.46354 | 2.40513 | 3.72494 | 3.29354 | 2.67741 | 2.69355 | 4.24690 | 2.90347 | 2.73739 | 3.18146 | 2.89801 | 2.37887 | 2.77519 | 2.98518 | 4.58477 | 3.61503 |
|       | 0.02666 | 4.03368 | 4.75603 | 0.61958 | 0.77255 | 0.48576 | 0.95510 |         |         |         |         |         |         |         |         |         |         |         |         |         |
| 12    | 1.97115 | 4.45870 | 3.18327 | 2.44430 | 3.72808 | 3.25915 | 3.76157 | 2.62687 | 2.66456 | 2.77557 | 3.64604 | 3.12438 | 3.85281 | 2.99907 | 3.06669 | 2.60077 | 2.52757 | 2.78567 | 5.11040 | 3.84173 |
|       | 2.68618 | 4.42225 | 2.77519 | 2.73123 | 3.46354 | 2.40513 | 3.72494 | 3.29354 | 2.67741 | 2.69355 | 4.24690 | 2.90347 | 2.73739 | 3.18146 | 2.89801 | 2.37887 | 2.77519 | 2.98518 | 4.58477 | 3.61503 |
|       | 0.02666 | 4.03368 | 4.75603 | 0.61958 | 0.77255 | 0.48576 | 0.95510 |         |         |         |         |         |         |         |         |         |         |         |         |         |
| 13    | 2.24701 | 4.90195 | 2.83467 | 1.97605 | 4.19402 | 3.20071 | 3.61138 | 3.54101 | 2.38928 | 3.19619 | 3.99358 | 2.88801 | 3.30337 | 2.59582 | 2.78881 | 2.52287 | 2.84874 | 3.27087 | 5.40419 | 4.04591 |
|       | 2.68618 | 4.42225 | 2.77519 | 2.73123 | 3.46354 | 2.40513 | 3.72494 | 3.29354 | 2.67741 | 2.69355 | 4.24690 | 2.90347 | 2.73739 | 3.18146 | 2.89801 | 2.37887 | 2.77519 | 2.98518 | 4.58477 | 3.61503 |
|       | 0.02666 | 4.03368 | 4.75603 | 0.61958 | 0.77255 | 0.48576 | 0.95510 |         |         |         |         |         |         |         |         |         |         |         |         |         |
| 14    | 2.48967 | 4.87077 | 2.74862 | 1.98688 | 4.13205 | 3.38281 | 3.60385 | 3.55951 | 2.35147 | 2.97488 | 3.94151 | 2.76922 | 3.78967 | 2.66518 | 2.86197 | 2.57292 | 2.71091 | 2.82760 | 5.36083 | 4.00718 |
|       | 2.68618 | 4.42225 | 2.77519 | 2.73123 | 3.46354 | 2.40513 | 3.72494 | 3.29354 | 2.67741 | 2.69355 | 4.24690 | 2.90347 | 2.73739 | 3.18146 | 2.89801 | 2.37887 | 2.77519 | 2.98518 | 4.58477 | 3.61503 |
|       | 0.02666 | 4.03368 | 4.75603 | 0.61958 | 0.77255 | 0.48576 | 0.95510 |         |         |         |         |         |         |         |         |         |         |         |         |         |
| 15    | 2.21101 | 4.84015 | 2.79123 | 2.20995 | 4.10310 | 3.38911 | 3.60387 | 3.52705 | 2.33419 | 3.11272 | 3.91628 | 2.91079 | 3.39360 | 2.74445 | 2.61563 | 2.60702 | 2.74519 | 2.87185 | 5.33760 | 3.99104 |
|       | 2.68618 | 4.42225 | 2.77519 | 2.73123 | 3.46354 | 2.40513 | 3.72494 | 3.29354 | 2.67741 | 2.69355 | 4.24690 | 2.90347 | 2.73739 | 3.18146 | 2.89801 | 2.37887 | 2.77519 | 2.98518 | 4.58477 | 3.61503 |
|       | 0.02666 | 4.03368 | 4.75603 | 0.61958 | 0.77255 | 0.48576 | 0.95510 |         |         |         |         |         |         |         |         |         |         |         |         |         |
| 16    | 2.50877 | 4.77658 | 2.90623 | 2.46577 | 4.15327 | 3.34987 | 3.68100 | 3.56734 | 2.21883 | 3.16281 | 3.98463 | 2.96345 | 2.27966 | 2.70310 | 2.85219 | 2.36300 | 2.77709 | 3.21887 | 5.38856 | 4.06817 |
|       | 2.68618 | 4.42225 | 2.77519 | 2.73123 | 3.46354 | 2.40513 | 3.72494 | 3.29354 | 2.67741 |         |         |         |         |         |         |         |         |         |         |         |













































|     |         |         |         |         |         |         |         |         |         |         |         |         |         |         |         |         |         |         |         |         |     |   |   |   |   |
|-----|---------|---------|---------|---------|---------|---------|---------|---------|---------|---------|---------|---------|---------|---------|---------|---------|---------|---------|---------|---------|-----|---|---|---|---|
|     | 2.68618 | 4.42225 | 2.77519 | 2.73123 | 3.46354 | 2.40513 | 3.72494 | 3.29354 | 2.67741 | 2.69355 | 4.24690 | 2.90347 | 2.73739 | 3.18146 | 2.89801 | 2.37887 | 2.77519 | 2.98518 | 4.58477 | 3.61503 |     |   |   |   |   |
|     | 0.02633 | 4.04612 | 4.76847 | 0.61958 | 0.77255 | 0.48576 | 0.95510 |         |         |         |         |         |         |         |         |         |         |         |         |         |     |   |   |   |   |
| 250 | 2.25059 | 3.38158 | 3.90517 | 3.32755 | 3.22376 | 3.66744 | 3.97751 | 2.29986 | 3.22971 | 2.17976 | 2.85218 | 3.59444 | 4.04141 | 3.32308 | 3.46187 | 2.94897 | 2.60422 | 2.01408 | 4.74130 | 3.54198 | 272 | v | - | - | - |
|     | 2.68618 | 4.42225 | 2.77519 | 2.73123 | 3.46354 | 2.40513 | 3.72494 | 3.29354 | 2.67741 | 2.69355 | 4.24690 | 2.90347 | 2.73739 | 3.18146 | 2.89801 | 2.37887 | 2.77519 | 2.98518 | 4.58477 | 3.61503 |     |   |   |   |   |
|     | 0.14186 | 4.04612 | 2.16484 | 0.61958 | 0.77255 | 0.48576 | 0.95510 |         |         |         |         |         |         |         |         |         |         |         |         |         |     |   |   |   |   |
| 251 | 2.23664 | 4.71025 | 2.89415 | 2.16067 | 4.00559 | 3.19971 | 3.63458 | 3.41495 | 2.44965 | 2.93789 | 3.85538 | 2.92816 | 3.51902 | 2.71691 | 2.89830 | 2.34351 | 2.81060 | 2.99164 | 5.28315 | 3.95811 | 273 | e | - | - | - |
|     | 2.68618 | 4.42225 | 2.77519 | 2.73123 | 3.46354 | 2.40513 | 3.72494 | 3.29354 | 2.67741 | 2.69355 | 4.24690 | 2.90347 | 2.73739 | 3.18146 | 2.89801 | 2.37887 | 2.77519 | 2.98518 | 4.58477 | 3.61503 |     |   |   |   |   |
|     | 0.05336 | 3.93376 | 3.42977 | 0.61958 | 0.77255 | 0.59502 | 0.80196 |         |         |         |         |         |         |         |         |         |         |         |         |         |     |   |   |   |   |
| 252 | 2.17968 | 4.69318 | 2.61300 | 2.34940 | 3.97571 | 3.09329 | 3.64094 | 3.37960 | 2.48319 | 2.67285 | 3.83763 | 2.91966 | 3.40143 | 2.81293 | 2.93994 | 2.53858 | 2.81231 | 3.06125 | 5.26994 | 3.94520 | 274 | a | - | - | - |
|     | 2.68618 | 4.42225 | 2.77519 | 2.73123 | 3.46354 | 2.40513 | 3.72494 | 3.29354 | 2.67741 | 2.69355 | 4.24690 | 2.90347 | 2.73739 | 3.18146 | 2.89801 | 2.37887 | 2.77519 | 2.98518 | 4.58477 | 3.61503 |     |   |   |   |   |
|     | 0.05010 | 3.91061 | 3.54611 | 0.61958 | 0.77255 | 0.61475 | 0.77822 |         |         |         |         |         |         |         |         |         |         |         |         |         |     |   |   |   |   |
| 253 | 2.13927 | 4.27925 | 3.55351 | 2.89628 | 3.48024 | 3.57423 | 3.94104 | 2.40456 | 2.93432 | 2.10260 | 3.40440 | 3.39492 | 3.99141 | 3.26597 | 3.26648 | 2.86288 | 2.76895 | 2.04365 | 5.00138 | 3.77144 | 275 | v | - | - | - |
|     | 2.68618 | 4.42225 | 2.77519 | 2.73123 | 3.46354 | 2.40513 | 3.72494 | 3.29354 | 2.67741 | 2.69355 | 4.24690 | 2.90347 | 2.73739 | 3.18146 | 2.89801 | 2.37887 | 2.77519 | 2.98518 | 4.58477 | 3.61503 |     |   |   |   |   |
|     | 0.03080 | 3.89131 | 4.61366 | 0.61958 | 0.77255 | 0.63056 | 0.75992 |         |         |         |         |         |         |         |         |         |         |         |         |         |     |   |   |   |   |
| 254 | 2.58488 | 4.87102 | 2.58654 | 1.99953 | 4.13582 | 3.34540 | 3.57533 | 3.56487 | 2.31411 | 3.14050 | 3.94265 | 2.85355 | 3.76162 | 2.71356 | 2.72111 | 2.58994 | 2.61691 | 3.03706 | 5.35492 | 3.75271 | 276 | e | - | - | - |
|     | 2.68618 | 4.42225 | 2.77519 | 2.73123 | 3.46354 | 2.40513 | 3.72494 | 3.29354 | 2.67741 | 2.69355 | 4.24690 | 2.90347 | 2.73739 | 3.18146 | 2.89801 | 2.37887 | 2.77519 | 2.98518 | 4.58477 | 3.61503 |     |   |   |   |   |
|     | 0.10829 | 3.89131 | 2.49848 | 0.61958 | 0.77255 | 0.63056 | 0.75992 |         |         |         |         |         |         |         |         |         |         |         |         |         |     |   |   |   |   |
| 255 | 2.34772 | 4.64633 | 2.80239 | 2.28830 | 3.87510 | 3.18314 | 3.60764 | 3.27473 | 2.44532 | 2.90950 | 3.74652 | 2.92088 | 3.43763 | 2.70512 | 2.89208 | 2.60433 | 2.78366 | 2.73162 | 5.18381 | 3.65250 | 277 | e | - | - | - |
|     | 2.68572 | 4.42196 | 2.77531 | 2.73061 | 3.46392 | 2.40531 | 3.72492 | 3.29369 | 2.67759 | 2.69361 | 4.24556 | 2.90343 | 2.73707 | 3.18164 | 2.89828 | 2.37919 | 2.77526 | 2.98510 | 4.58485 | 3.61523 |     |   |   |   |   |
|     | 0.38147 | 1.14840 | *       | 2.06445 | 0.13569 | 0.00000 | *       |         |         |         |         |         |         |         |         |         |         |         |         |         |     |   |   |   |   |

//  
HMMER3/f [3.1b2 | February 2015]

NAME mmoX\_loose  
LENG 519  
ALPH amino  
RF no  
MM no  
CONS yes  
CS no  
MAP yes  
DATE Wed Mar 28 11:40:54 2018  
NSEQ 205  
EFFN 1.654739  
CKSUM 4003712988  
STATS LOCAL MSV -11.7524 0.69784  
STATS LOCAL VITERBI -12.7209 0.69784  
STATS LOCAL FORWARD -6.3533 0.69784

| HMM   | A       | C       | D       | E       | F       | G       | H       | I       | K       | L       | M       | N       | P       | Q       | R       | S       | T       | V       | W       | Y       |    |   |   |   |   |
|-------|---------|---------|---------|---------|---------|---------|---------|---------|---------|---------|---------|---------|---------|---------|---------|---------|---------|---------|---------|---------|----|---|---|---|---|
| COMPO | m->m    | m->i    | m->d    | i->m    | i->i    | d->m    | d->d    |         |         |         |         |         |         |         |         |         |         |         |         |         |    |   |   |   |   |
|       | 2.50695 | 4.35371 | 2.87717 | 2.57714 | 3.23079 | 2.98877 | 3.53991 | 2.96335 | 2.70128 | 2.59040 | 3.55212 | 3.07618 | 3.34217 | 3.02962 | 2.90626 | 2.73479 | 2.82016 | 2.74569 | 3.95917 | 3.22557 |    |   |   |   |   |
|       | 2.68522 | 4.42293 | 2.77522 | 2.73181 | 3.46405 | 2.40556 | 3.72563 | 3.29361 | 2.67717 | 2.69307 | 4.24136 | 2.90367 | 2.73762 | 3.18179 | 2.89831 | 2.37905 | 2.77441 | 2.98559 | 4.58545 | 3.61571 |    |   |   |   |   |
|       | 0.81050 | 1.09933 | 1.50385 | 2.01078 | 0.14374 | 0.00000 | *       |         |         |         |         |         |         |         |         |         |         |         |         |         |    |   |   |   |   |
| 1     | 2.69544 | 4.18642 | 4.06093 | 3.48319 | 3.29303 | 3.80171 | 4.11029 | 1.98021 | 3.37763 | 2.09669 | 2.36829 | 2.94376 | 4.16498 | 3.62154 | 3.59718 | 3.08682 | 2.76717 | 1.96609 | 4.84210 | 3.64674 | 22 | v | - | - | - |
|       | 2.68618 | 4.42225 | 2.77519 | 2.73123 | 3.46354 | 2.40513 | 3.72494 | 3.29354 | 2.67741 | 2.69355 | 4.24690 | 2.90347 | 2.73739 | 3.18146 | 2.89801 | 2.37887 | 2.77519 | 2.98518 | 4.58477 | 3.61503 |    |   |   |   |   |
|       | 0.02141 | 4.25055 | 4.97289 | 0.61958 | 0.77255 | 0.79986 | 0.59673 |         |         |         |         |         |         |         |         |         |         |         |         |         |    |   |   |   |   |
| 2     | 2.32183 | 4.70708 | 3.11648 | 2.56123 | 3.94795 | 3.47076 | 3.70832 | 3.32181 | 2.52876 | 2.69327 | 3.81631 | 3.05784 | 3.67283 | 2.75418 | 2.64405 | 2.15697 | 2.35091 | 3.02838 | 5.25681 | 3.95066 | 23 | s | - | - | - |
|       | 2.68618 | 4.42225 | 2.77519 | 2.73123 | 3.46354 | 2.40513 | 3.72494 | 3.29354 | 2.67741 | 2.69355 | 4.24690 | 2.90347 | 2.73739 | 3.18146 | 2.89801 | 2.37887 | 2.77519 | 2.98518 | 4.58477 | 3.61503 |    |   |   |   |   |
|       | 0.05415 | 4.25055 | 3.25839 | 0.61958 | 0.77255 | 0.79986 | 0.59673 |         |         |         |         |         |         |         |         |         |         |         |         |         |    |   |   |   |   |
| 3     | 2.21148 | 4.96579 | 3.08916 | 2.53643 | 4.31251 | 3.49094 | 3.67149 | 3.72545 | 2.09955 | 3.27518 | 4.08447 | 3.03426 | 3.89809 | 2.75839 | 1.91744 | 2.27048 | 2.96073 | 3.37356 | 5.45274 | 4.14328 | 24 | r | - | - | - |
|       | 2.68618 | 4.42225 | 2.77519 | 2.73123 | 3.46354 | 2.40513 | 3.72494 | 3.29354 | 2.67741 | 2.69355 | 4.24690 | 2.90347 | 2.73739 | 3.18146 | 2.89801 | 2.37887 | 2.77519 | 2.98518 | 4.58477 | 3.61503 |    |   |   |   |   |
|       | 0.02211 | 4.21851 | 4.94086 | 0.61958 | 0.77255 | 0.71011 | 0.67647 |         |         |         |         |         |         |         |         |         |         |         |         |         |    |   |   |   |   |
| 4     | 2.68108 | 5.04788 | 2.95057 | 2.32959 | 4.35397 | 3.45327 | 3.63951 | 3.79900 | 2.10645 | 3.32957 | 3.72462 | 2.94532 | 2.94885 | 1.95455 | 2.80226 | 2.45199 | 2.91005 | 3.41925 | 5.50091 | 4.13612 | 25 | q | - | - | - |
|       | 2.68618 | 4.42225 | 2.77519 | 2.73123 | 3.46354 | 2.40513 | 3.72494 | 3.29354 | 2.67741 | 2.69355 | 4.24690 | 2.90347 | 2.73739 | 3.18146 | 2.89801 | 2.37887 | 2.77519 | 2.98518 | 4.58477 | 3.61503 |    |   |   |   |   |
|       | 0.19790 | 4.27750 | 1.79773 | 0.61958 | 0.77255 | 0.53561 | 0.88023 |         |         |         |         |         |         |         |         |         |         |         |         |         |    |   |   |   |   |
| 5     | 2.57264 | 4.76035 | 2.77236 | 2.51149 | 3.98306 | 3.47183 | 3.67733 | 3.18397 | 2.12255 | 3.00940 | 2.90080 | 3.02109 | 3.86049 | 2.84271 | 2.51944 | 2.68075 | 2.72000 | 2.75189 | 5.27481 | 3.95674 | 26 | k | - | - | - |
|       | 2.68618 | 4.42225 | 2.77519 | 2.73123 | 3.46354 | 2.40513 | 3.72494 | 3.29354 | 2.67741 | 2.69355 | 4.24690 | 2.90347 | 2.73739 | 3.18146 | 2.89801 | 2.37887 | 2.77519 | 2.98518 | 4.58477 | 3.61503 |    |   |   |   |   |
|       | 0.02168 | 4.23814 | 4.96049 | 0.61958 | 0.77255 | 0.69200 | 0.69430 |         |         |         |         |         |         |         |         |         |         |         |         |         |    |   |   |   |   |
| 6     | 2.41079 | 4.41677 | 3.41107 | 2.84661 | 3.56802 | 2.54999 | 3.82791 | 2.93482 | 2.68377 | 2.31604 | 3.24520 | 3.17091 | 3.96350 | 3.12200 | 3.18301 | 2.61049 | 2.45989 | 2.69938 | 3.74144 | 3.74588 | 27 | l | - | - | - |
|       | 2.68618 | 4.42225 | 2.77519 | 2.73123 | 3.46354 | 2.40513 | 3.72494 | 3.29354 | 2.67741 | 2.69355 | 4.24690 | 2.90347 | 2.73739 | 3.18146 | 2.89801 | 2.37887 | 2.77519 | 2.98518 | 4.58477 | 3.61503 |    |   |   |   |   |
|       | 0.02045 | 4.29592 | 5.01827 | 0.61958 | 0.77255 | 0.75362 | 0.63613 |         |         |         |         |         |         |         |         |         |         |         |         |         |    |   |   |   |   |
| 7     | 2.36975 | 4.37605 | 3.46586 | 2.89934 | 3.51755 | 2.90833 | 3.64906 | 2.33986 | 2.74244 | 2.58966 | 3.44196 | 3.31609 | 3.57590 | 3.16313 | 2.92611 | 2.83868 | 2.79200 | 2.29074 | 4.95450 | 3.18611 | 28 | v | - | - | - |
|       | 2.68618 | 4.42225 | 2.77519 | 2.73123 | 3.46354 | 2.40513 | 3.72494 | 3.29354 | 2.67741 | 2.69355 | 4.24690 | 2.90347 | 2.73739 | 3.18146 | 2.89801 | 2.37887 | 2.77519 | 2.98518 | 4.58477 | 3.61503 |    |   |   |   |   |
|       | 0.02045 | 4.29592 | 5.01827 | 0.61958 | 0.77255 | 0.49286 | 0.94385 |         |         |         |         |         |         |         |         |         |         |         |         |         |    |   |   |   |   |
| 8     | 2.67952 | 5.02701 | 2.72161 | 2.35316 | 3.91952 | 3.09534 | 3.67483 | 3.75562 | 2.34369 | 2.80562 | 4.08660 | 2.72846 | 3.51428 | 2.79693 | 2.92289 | 1.86524 | 2.84511 | 3.38479 | 5.50001 | 4.12915 | 29 | s | - | - | - |
|       | 2.68618 | 4.42225 | 2.77519 | 2.73123 | 3.46354 | 2.40513 | 3.72494 | 3.29354 | 2.67741 | 2.69355 | 4.24690 | 2.90347 | 2.73739 | 3.18146 | 2.89801 | 2.37887 | 2.77519 | 2.98518 | 4.58477 | 3.61503 |    |   |   |   |   |
|       | 0.01805 | 4.41940 | 5.14174 | 0.61958 | 0.77255 | 0.53509 | 0.88097 |         |         |         |         |         |         |         |         |         |         |         |         |         |    |   |   |   |   |
| 9     | 2.33129 | 4.23055 | 3.96949 | 3.39072 | 3.34129 | 3.77094 | 4.06197 | 2.30374 | 2.73159 | 1.73376 | 3.09806 | 3.67329 | 3.60953 | 3.54933 | 3.53728 | 3.04611 | 2.91332 | 2.06144 | 4.84773 | 3.64677 | 30 | l | - | - | - |









































































|     |         |         |         |         |         |         |         |         |         |         |         |         |         |         |         |         |         |         |         |         |     |   |   |   |   |
|-----|---------|---------|---------|---------|---------|---------|---------|---------|---------|---------|---------|---------|---------|---------|---------|---------|---------|---------|---------|---------|-----|---|---|---|---|
| 287 | 2.61765 | 4.39623 | 3.28327 | 3.17805 | 4.31966 | 0.79266 | 4.30013 | 3.91025 | 3.35388 | 3.56921 | 4.54515 | 3.44774 | 3.78610 | 3.68127 | 3.59365 | 2.78855 | 3.09584 | 3.44624 | 5.42460 | 4.42045 | 287 | g | - | - | - |
|     | 2.68618 | 4.42225 | 2.77519 | 2.73123 | 3.46354 | 2.40513 | 3.72494 | 3.29354 | 2.67741 | 2.69355 | 4.24690 | 2.90347 | 2.73739 | 3.18146 | 2.89801 | 2.37887 | 2.77519 | 2.98518 | 4.58477 | 3.61503 |     |   |   |   |   |
|     | 0.03268 | 3.83303 | 4.55537 | 0.61958 | 0.77255 | 0.48576 | 0.95510 |         |         |         |         |         |         |         |         |         |         |         |         |         |     |   |   |   |   |
| 288 | 2.41907 | 4.26330 | 3.62691 | 3.09372 | 3.11653 | 3.60922 | 3.85727 | 2.56557 | 2.97261 | 2.21088 | 2.51234 | 3.43506 | 4.00442 | 3.29799 | 3.26236 | 2.90196 | 2.87706 | 2.41237 | 4.69620 | 2.54988 | 288 | l | - | - | - |
|     | 2.68618 | 4.42225 | 2.77519 | 2.73123 | 3.46354 | 2.40513 | 3.72494 | 3.29354 | 2.67741 | 2.69355 | 4.24690 | 2.90347 | 2.73739 | 3.18146 | 2.89801 | 2.37887 | 2.77519 | 2.98518 | 4.58477 | 3.61503 |     |   |   |   |   |
|     | 0.03268 | 3.83303 | 4.55537 | 0.61958 | 0.77255 | 0.48576 | 0.95510 |         |         |         |         |         |         |         |         |         |         |         |         |         |     |   |   |   |   |
| 289 | 2.53550 | 4.38902 | 4.00901 | 3.48158 | 3.21880 | 3.88718 | 4.27348 | 2.20437 | 3.31416 | 1.35813 | 2.77965 | 3.80497 | 4.26068 | 3.63970 | 3.56903 | 3.21863 | 3.10410 | 2.15734 | 5.03843 | 3.84802 | 289 | l | - | - | - |
|     | 2.68618 | 4.42225 | 2.77519 | 2.73123 | 3.46354 | 2.40513 | 3.72494 | 3.29354 | 2.67741 | 2.69355 | 4.24690 | 2.90347 | 2.73739 | 3.18146 | 2.89801 | 2.37887 | 2.77519 | 2.98518 | 4.58477 | 3.61503 |     |   |   |   |   |
|     | 0.03268 | 3.83303 | 4.55537 | 0.61958 | 0.77255 | 0.48576 | 0.95510 |         |         |         |         |         |         |         |         |         |         |         |         |         |     |   |   |   |   |
| 290 | 3.16565 | 4.57542 | 4.32949 | 3.89837 | 1.46633 | 4.12523 | 3.93908 | 2.44916 | 3.75317 | 1.64553 | 3.17551 | 4.02445 | 4.46331 | 3.92659 | 3.90981 | 3.51146 | 3.41891 | 2.47589 | 4.21808 | 2.62273 | 290 | f | - | - | - |
|     | 2.68618 | 4.42225 | 2.77519 | 2.73123 | 3.46354 | 2.40513 | 3.72494 | 3.29354 | 2.67741 | 2.69355 | 4.24690 | 2.90347 | 2.73739 | 3.18146 | 2.89801 | 2.37887 | 2.77519 | 2.98518 | 4.58477 | 3.61503 |     |   |   |   |   |
|     | 0.03268 | 3.83303 | 4.55537 | 0.61958 | 0.77255 | 0.48576 | 0.95510 |         |         |         |         |         |         |         |         |         |         |         |         |         |     |   |   |   |   |
| 291 | 2.91965 | 5.02079 | 2.47306 | 1.08285 | 4.36227 | 3.24954 | 3.83381 | 3.80837 | 2.70946 | 3.43216 | 4.40865 | 2.91254 | 3.85246 | 3.05076 | 3.11366 | 2.90651 | 3.22382 | 3.49656 | 5.54134 | 4.26436 | 291 | e | - | - | - |
|     | 2.68618 | 4.42225 | 2.77519 | 2.73123 | 3.46354 | 2.40513 | 3.72494 | 3.29354 | 2.67741 | 2.69355 | 4.24690 | 2.90347 | 2.73739 | 3.18146 | 2.89801 | 2.37887 | 2.77519 | 2.98518 | 4.58477 | 3.61503 |     |   |   |   |   |
|     | 0.03268 | 3.83303 | 4.55537 | 0.61958 | 0.77255 | 0.48576 | 0.95510 |         |         |         |         |         |         |         |         |         |         |         |         |         |     |   |   |   |   |
| 292 | 3.19134 | 4.69630 | 3.78054 | 3.50310 | 2.29611 | 3.78460 | 3.60201 | 3.20618 | 3.36176 | 2.67014 | 3.88549 | 3.67575 | 4.25966 | 3.67727 | 3.55331 | 3.33175 | 3.47801 | 3.07495 | 3.93816 | 1.03399 | 292 | y | - | - | - |
|     | 2.68618 | 4.42225 | 2.77519 | 2.73123 | 3.46354 | 2.40513 | 3.72494 | 3.29354 | 2.67741 | 2.69355 | 4.24690 | 2.90347 | 2.73739 | 3.18146 | 2.89801 | 2.37887 | 2.77519 | 2.98518 | 4.58477 | 3.61503 |     |   |   |   |   |
|     | 0.03268 | 3.83303 | 4.55537 | 0.61958 | 0.77255 | 0.48576 | 0.95510 |         |         |         |         |         |         |         |         |         |         |         |         |         |     |   |   |   |   |
| 293 | 2.61765 | 4.39623 | 3.28327 | 3.17805 | 4.31966 | 0.79266 | 4.30013 | 3.91025 | 3.35388 | 3.56921 | 4.54515 | 3.44774 | 3.78610 | 3.68127 | 3.59365 | 2.78855 | 3.09584 | 3.44624 | 5.42460 | 4.42045 | 293 | g | - | - | - |
|     | 2.68618 | 4.42225 | 2.77519 | 2.73123 | 3.46354 | 2.40513 | 3.72494 | 3.29354 | 2.67741 | 2.69355 | 4.24690 | 2.90347 | 2.73739 | 3.18146 | 2.89801 | 2.37887 | 2.77519 | 2.98518 | 4.58477 | 3.61503 |     |   |   |   |   |
|     | 0.03268 | 3.83303 | 4.55537 | 0.61958 | 0.77255 | 0.48576 | 0.95510 |         |         |         |         |         |         |         |         |         |         |         |         |         |     |   |   |   |   |
| 294 | 2.29672 | 4.21624 | 3.17324 | 2.98785 | 4.03735 | 2.94690 | 4.09847 | 3.55494 | 3.05893 | 3.27847 | 4.20833 | 3.21852 | 3.68259 | 3.41149 | 3.34573 | 1.15212 | 2.77402 | 3.09870 | 5.41316 | 4.12083 | 294 | s | - | - | - |
|     | 2.68618 | 4.42225 | 2.77519 | 2.73123 | 3.46354 | 2.40513 | 3.72494 | 3.29354 | 2.67741 | 2.69355 | 4.24690 | 2.90347 | 2.73739 | 3.18146 | 2.89801 | 2.37887 | 2.77519 | 2.98518 | 4.58477 | 3.61503 |     |   |   |   |   |
|     | 0.03268 | 3.83303 | 4.55537 | 0.61958 | 0.77255 | 0.48576 | 0.95510 |         |         |         |         |         |         |         |         |         |         |         |         |         |     |   |   |   |   |
| 295 | 2.74000 | 4.82297 | 3.05712 | 2.55017 | 3.76954 | 3.47136 | 3.16627 | 3.48219 | 1.66964 | 3.04635 | 3.91799 | 3.01766 | 3.87278 | 2.77624 | 2.49024 | 2.77669 | 2.95467 | 3.18995 | 5.06852 | 3.15018 | 295 | k | - | - | - |
|     | 2.68618 | 4.42225 | 2.77519 | 2.73123 | 3.46354 | 2.40513 | 3.72494 | 3.29354 | 2.67741 | 2.69355 | 4.24690 | 2.90347 | 2.73739 | 3.18146 | 2.89801 | 2.37887 | 2.77519 | 2.98518 | 4.58477 | 3.61503 |     |   |   |   |   |
|     | 0.03268 | 3.83303 | 4.55537 | 0.61958 | 0.77255 | 0.48576 | 0.95510 |         |         |         |         |         |         |         |         |         |         |         |         |         |     |   |   |   |   |
| 296 | 3.27048 | 4.64138 | 4.25823 | 3.87451 | 1.24758 | 4.10742 | 3.51349 | 2.92823 | 3.74392 | 2.30076 | 3.56638 | 3.86566 | 4.44830 | 3.85385 | 3.87583 | 3.47123 | 3.50746 | 2.87164 | 3.72551 | 1.81967 | 296 | f | - | - | - |
|     | 2.68618 | 4.42225 | 2.77519 | 2.73123 | 3.46354 | 2.40513 | 3.72494 | 3.29354 | 2.67741 | 2.69355 | 4.24690 | 2.90347 | 2.73739 | 3.18146 | 2.89801 | 2.37887 | 2.77519 | 2.98518 | 4.58477 | 3.61503 |     |   |   |   |   |
|     | 0.03268 | 3.83303 | 4.55537 | 0.61958 | 0.77255 | 0.48576 | 0.95510 |         |         |         |         |         |         |         |         |         |         |         |         |         |     |   |   |   |   |
| 297 | 2.93703 | 4.89791 | 3.11032 | 2.74002 | 4.27531 | 3.43004 | 3.73906 | 3.70226 | 1.09362 | 3.27630 | 4.24050 | 3.16601 | 3.93369 | 2.93324 | 2.42654 | 2.98198 | 3.19357 | 3.41249 | 5.34669 | 4.15401 | 297 | k | - | - | - |
|     | 2.68618 | 4.42225 | 2.77519 | 2.73123 | 3.46354 | 2.40513 | 3.72494 | 3.29354 | 2.67741 | 2.69355 | 4.24690 | 2.90347 | 2.73739 | 3.18146 | 2.89801 | 2.37887 | 2.77519 | 2.98518 | 4.58477 | 3.61503 |     |   |   |   |   |
|     | 0.03268 | 3.83303 | 4.55537 | 0.61958 | 0.77255 | 0.48576 | 0.95510 |         |         |         |         |         |         |         |         |         |         |         |         |         |     |   |   |   |   |
| 298 | 2.77113 | 4.33135 | 4.07016 | 3.73272 | 3.52199 | 3.68239 | 4.54148 | 2.05456 | 3.59987 | 2.21635 | 3.49380 | 3.92869 | 4.24556 | 3.96282 | 3.81605 | 3.18396 | 3.13994 | 1.07623 | 5.29954 | 4.02841 | 298 | v | - | - | - |
|     | 2.68618 | 4.42225 | 2.77519 | 2.73123 | 3.46354 | 2.40513 | 3.72494 | 3.29354 | 2.67741 | 2.69355 | 4.24690 | 2.90347 | 2.73739 | 3.18146 | 2.89801 | 2.37887 | 2.77519 | 2.98518 | 4.58477 | 3.61503 |     |   |   |   |   |
|     | 0.03268 | 3.83303 | 4.55537 | 0.61958 | 0.77255 | 0.48576 | 0.95510 |         |         |         |         |         |         |         |         |         |         |         |         |         |     |   |   |   |   |
| 299 | 2.84347 | 5.27224 | 1.96615 | 1.36141 | 4.56663 | 3.17767 | 3.70122 | 4.04262 | 2.66829 | 3.60143 | 4.46940 | 2.67385 | 3.78186 | 2.87491 | 3.20659 | 2.76041 | 3.12981 | 3.65752 | 5.76303 | 4.31947 | 299 | e | - | - | - |
|     | 2.68618 | 4.42225 | 2.77519 | 2.73123 | 3.46354 | 2.40513 | 3.72494 | 3.29354 | 2.67741 | 2.69355 | 4.24690 | 2.90347 | 2.73739 | 3.18146 | 2.89801 | 2.37887 | 2.77519 | 2.98518 | 4.58477 | 3.61503 |     |   |   |   |   |
|     | 0.03268 | 3.83303 | 4.55537 | 0.61958 | 0.77255 | 0.48576 | 0.95510 |         |         |         |         |         |         |         |         |         |         |         |         |         |     |   |   |   |   |
| 300 | 2.70125 | 4.46443 | 3.30428 | 3.13815 | 4.13555 | 3.15421 | 4.21835 | 3.67141 | 3.19219 | 3.30231 | 4.35093 | 3.44851 | 0.90433 | 3.58220 | 3.44165 | 2.86766 | 3.13986 | 3.32122 | 5.33234 | 4.25589 | 300 | p | - | - | - |
|     | 2.68618 | 4.42225 | 2.77519 | 2.73123 | 3.46354 | 2.40513 | 3.72494 | 3.29354 | 2.67741 | 2.69355 | 4.24690 | 2.90347 | 2.73739 | 3.18146 | 2.89801 | 2.37887 | 2.77519 | 2.98518 | 4.58477 | 3.61503 |     |   |   |   |   |
|     | 0.03268 | 3.83303 | 4.55537 | 0.61958 | 0.77255 | 0.48576 | 0.95510 |         |         |         |         |         |         |         |         |         |         |         |         |         |     |   |   |   |   |
| 301 | 3.27202 | 4.66041 | 4.03210 | 3.72890 | 2.62865 | 3.68698 | 3.85349 | 3.29453 | 3.45219 | 2.69596 | 3.93010 | 3.88606 | 4.20159 | 3.84191 | 3.58729 | 3.47606 | 3.57058 | 3.18378 | 0.96876 | 2.63291 | 301 | w | - | - | - |
|     | 2.68618 | 4.42225 | 2.77519 | 2.73123 | 3.46354 | 2.40513 | 3.72494 | 3.29354 | 2.67741 | 2.69355 | 4.24690 | 2.90347 | 2.73739 | 3.18146 | 2.89801 | 2.37887 | 2.77519 | 2.98518 | 4.58477 | 3.61503 |     |   |   |   |   |
|     | 0.03268 | 3.83303 | 4.55537 | 0.61958 | 0.77255 | 0.48576 | 0.95510 |         |         |         |         |         |         |         |         |         |         |         |         |         |     |   |   |   |   |
| 302 | 2.28632 | 4.22189 | 3.91607 | 3.53692 | 3.63679 | 3.49676 | 4.41425 | 2.12052 | 3.43851 | 2.35800 | 3.53720 | 3.72686 | 4.09222 | 3.77802 | 3.68977 | 2.92844 | 2.95647 | 1.29149 | 5.34662 | 4.10917 | 302 | v | - | - | - |
|     | 2.68618 | 4.42225 | 2.77519 | 2.73123 | 3.46354 | 2.40513 | 3.72494 | 3.29354 | 2.67741 | 2.69355 | 4.24690 | 2.90347 | 2.73739 | 3.18146 | 2.89801 | 2.37887 | 2.77519 | 2.98518 | 4.58477 | 3.61503 |     |   |   |   |   |
|     | 0.03268 | 3.83303 | 4.55537 | 0.61958 | 0.77255 | 0.48576 | 0.95510 |         |         |         |         |         |         |         |         |         |         |         |         |         |     |   |   |   |   |
| 303 | 2.93703 | 4.89791 | 3.11032 | 2.74002 | 4.27531 | 3.43004 | 3.73906 | 3.70226 | 1.09362 | 3.27630 | 4.24050 | 3.16601 | 3.93369 | 2.93324 | 2.42654 | 2.98198 | 3.19357 | 3.41249 | 5.34669 | 4.15401 | 303 | k | - | - | - |
|     | 2.68618 | 4.42225 | 2.77519 | 2.73123 | 3.46354 | 2.40513 | 3.72494 | 3.29354 | 2.67741 | 2.69355 | 4.24690 | 2.90347 | 2.73739 | 3.18146 | 2.89801 | 2.37887 | 2.77519 | 2.98518 | 4.58477 | 3.61503 |     |   |   |   |   |
|     | 0.03268 | 3.83303 | 4.55537 | 0.61958 | 0.77255 | 0.48576 | 0.95510 |         |         |         |         |         |         |         |         |         |         |         |         |         |     |   |   |   |   |
| 304 | 2.51552 | 4.29020 | 3.53305 | 3.07325 | 3.57552 | 3.37263 | 4.01833 | 2.60319 | 2.92729 | 2.41160 | 2.95564 | 3.38734 | 3.91820 | 3.31845 | 3.22825 | 2.74787 | 1.76434 | 2.41491 | 5.14310 | 3.89603 | 304 | t | - | - | - |
|     | 2.68618 | 4.42225 | 2.77519 |         |         |         |         |         |         |         |         |         |         |         |         |         |         |         |         |         |     |   |   |   |   |

|     |         |         |         |         |         |         |         |         |         |         |         |         |         |         |         |         |         |         |         |         |     |   |   |   |   |
|-----|---------|---------|---------|---------|---------|---------|---------|---------|---------|---------|---------|---------|---------|---------|---------|---------|---------|---------|---------|---------|-----|---|---|---|---|
|     | 2.68618 | 4.42225 | 2.77519 | 2.73123 | 3.46354 | 2.40513 | 3.72494 | 3.29354 | 2.67741 | 2.69355 | 4.24690 | 2.90347 | 2.73739 | 3.18146 | 2.89801 | 2.37887 | 2.77519 | 2.98518 | 4.58477 | 3.61503 |     |   |   |   |   |
|     | 0.03268 | 3.83303 | 4.55537 | 0.61958 | 0.77255 | 0.48576 | 0.95510 |         |         |         |         |         |         |         |         |         |         |         |         |         |     |   |   |   |   |
| 310 | 3.19134 | 4.69630 | 3.78054 | 3.50310 | 2.29611 | 3.78460 | 3.60201 | 3.20618 | 3.36176 | 2.67014 | 3.88549 | 3.67575 | 4.25966 | 3.67727 | 3.55331 | 3.33175 | 3.47801 | 3.07495 | 3.93816 | 1.03399 | 310 | y | - | - | - |
|     | 2.68618 | 4.42225 | 2.77519 | 2.73123 | 3.46354 | 2.40513 | 3.72494 | 3.29354 | 2.67741 | 2.69355 | 4.24690 | 2.90347 | 2.73739 | 3.18146 | 2.89801 | 2.37887 | 2.77519 | 2.98518 | 4.58477 | 3.61503 |     |   |   |   |   |
|     | 0.03268 | 3.83303 | 4.55537 | 0.61958 | 0.77255 | 0.48576 | 0.95510 |         |         |         |         |         |         |         |         |         |         |         |         |         |     |   |   |   |   |
| 311 | 2.91965 | 5.02079 | 2.47306 | 1.08285 | 4.36227 | 3.24954 | 3.83381 | 3.80837 | 2.70946 | 3.43216 | 4.40865 | 2.91254 | 3.85246 | 3.05076 | 3.11366 | 2.90651 | 3.22382 | 3.49656 | 5.54134 | 4.26436 | 311 | e | - | - | - |
|     | 2.68618 | 4.42225 | 2.77519 | 2.73123 | 3.46354 | 2.40513 | 3.72494 | 3.29354 | 2.67741 | 2.69355 | 4.24690 | 2.90347 | 2.73739 | 3.18146 | 2.89801 | 2.37887 | 2.77519 | 2.98518 | 4.58477 | 3.61503 |     |   |   |   |   |
|     | 0.03268 | 3.83303 | 4.55537 | 0.61958 | 0.77255 | 0.48576 | 0.95510 |         |         |         |         |         |         |         |         |         |         |         |         |         |     |   |   |   |   |
| 312 | 2.94831 | 5.06869 | 0.97632 | 2.31258 | 4.44069 | 3.18175 | 3.89799 | 4.02012 | 2.97493 | 3.63580 | 4.61368 | 2.86669 | 3.83184 | 3.13755 | 3.48525 | 2.91560 | 3.28628 | 3.66374 | 5.61691 | 4.32095 | 312 | d | - | - | - |
|     | 2.68618 | 4.42225 | 2.77519 | 2.73123 | 3.46354 | 2.40513 | 3.72494 | 3.29354 | 2.67741 | 2.69355 | 4.24690 | 2.90347 | 2.73739 | 3.18146 | 2.89801 | 2.37887 | 2.77519 | 2.98518 | 4.58477 | 3.61503 |     |   |   |   |   |
|     | 0.03268 | 3.83303 | 4.55537 | 0.61958 | 0.77255 | 0.48576 | 0.95510 |         |         |         |         |         |         |         |         |         |         |         |         |         |     |   |   |   |   |
| 313 | 3.27202 | 4.66041 | 4.03210 | 3.72890 | 2.62865 | 3.68698 | 3.85349 | 3.29453 | 3.45219 | 2.69596 | 3.93010 | 3.88606 | 4.20159 | 3.84191 | 3.58729 | 3.47606 | 3.57058 | 3.18378 | 0.96876 | 2.63291 | 313 | w | - | - | - |
|     | 2.68618 | 4.42225 | 2.77519 | 2.73123 | 3.46354 | 2.40513 | 3.72494 | 3.29354 | 2.67741 | 2.69355 | 4.24690 | 2.90347 | 2.73739 | 3.18146 | 2.89801 | 2.37887 | 2.77519 | 2.98518 | 4.58477 | 3.61503 |     |   |   |   |   |
|     | 0.03268 | 3.83303 | 4.55537 | 0.61958 | 0.77255 | 0.48576 | 0.95510 |         |         |         |         |         |         |         |         |         |         |         |         |         |     |   |   |   |   |
| 314 | 1.93948 | 4.16463 | 3.14032 | 2.96492 | 4.23010 | 1.42234 | 4.13207 | 3.58946 | 3.11373 | 3.33790 | 4.22032 | 3.18743 | 3.64246 | 3.41632 | 3.41889 | 2.40132 | 2.71746 | 3.09294 | 5.55959 | 4.34719 | 314 | g | - | - | - |
|     | 2.68618 | 4.42225 | 2.77519 | 2.73123 | 3.46354 | 2.40513 | 3.72494 | 3.29354 | 2.67741 | 2.69355 | 4.24690 | 2.90347 | 2.73739 | 3.18146 | 2.89801 | 2.37887 | 2.77519 | 2.98518 | 4.58477 | 3.61503 |     |   |   |   |   |
|     | 0.03268 | 3.83303 | 4.55537 | 0.61958 | 0.77255 | 0.48576 | 0.95510 |         |         |         |         |         |         |         |         |         |         |         |         |         |     |   |   |   |   |
| 315 | 2.61765 | 4.39623 | 3.28327 | 3.17805 | 4.31966 | 0.79266 | 4.30013 | 3.91025 | 3.35388 | 3.56921 | 4.54515 | 3.44774 | 3.78610 | 3.68127 | 3.59365 | 2.78855 | 3.09584 | 3.44624 | 5.42460 | 4.42045 | 315 | g | - | - | - |
|     | 2.68618 | 4.42225 | 2.77519 | 2.73123 | 3.46354 | 2.40513 | 3.72494 | 3.29354 | 2.67741 | 2.69355 | 4.24690 | 2.90347 | 2.73739 | 3.18146 | 2.89801 | 2.37887 | 2.77519 | 2.98518 | 4.58477 | 3.61503 |     |   |   |   |   |
|     | 0.03268 | 3.83303 | 4.55537 | 0.61958 | 0.77255 | 0.48576 | 0.95510 |         |         |         |         |         |         |         |         |         |         |         |         |         |     |   |   |   |   |
| 316 | 3.00047 | 4.43103 | 4.27833 | 3.89317 | 3.73483 | 4.02286 | 4.62907 | 1.12816 | 3.72049 | 1.94320 | 3.29060 | 4.14408 | 4.45846 | 4.07325 | 3.92162 | 3.51489 | 3.30059 | 1.84674 | 5.23051 | 3.96495 | 316 | i | - | - | - |
|     | 2.68618 | 4.42225 | 2.77519 | 2.73123 | 3.46354 | 2.40513 | 3.72494 | 3.29354 | 2.67741 | 2.69355 | 4.24690 | 2.90347 | 2.73739 | 3.18146 | 2.89801 | 2.37887 | 2.77519 | 2.98518 | 4.58477 | 3.61503 |     |   |   |   |   |
|     | 0.03268 | 3.83303 | 4.55537 | 0.61958 | 0.77255 | 0.48576 | 0.95510 |         |         |         |         |         |         |         |         |         |         |         |         |         |     |   |   |   |   |
| 317 | 3.27202 | 4.66041 | 4.03210 | 3.72890 | 2.62865 | 3.68698 | 3.85349 | 3.29453 | 3.45219 | 2.69596 | 3.93010 | 3.88606 | 4.20159 | 3.84191 | 3.58729 | 3.47606 | 3.57058 | 3.18378 | 0.96876 | 2.63291 | 317 | w | - | - | - |
|     | 2.68618 | 4.42225 | 2.77519 | 2.73123 | 3.46354 | 2.40513 | 3.72494 | 3.29354 | 2.67741 | 2.69355 | 4.24690 | 2.90347 | 2.73739 | 3.18146 | 2.89801 | 2.37887 | 2.77519 | 2.98518 | 4.58477 | 3.61503 |     |   |   |   |   |
|     | 0.03268 | 3.83303 | 4.55537 | 0.61958 | 0.77255 | 0.48576 | 0.95510 |         |         |         |         |         |         |         |         |         |         |         |         |         |     |   |   |   |   |
| 318 | 3.05842 | 4.44288 | 4.46438 | 3.97453 | 3.24535 | 4.25288 | 4.66494 | 1.28899 | 3.78539 | 1.63545 | 3.13223 | 4.24752 | 4.57064 | 4.09300 | 3.99079 | 3.63824 | 3.31861 | 1.80341 | 5.20134 | 3.95958 | 318 | i | - | - | - |
|     | 2.68618 | 4.42225 | 2.77519 | 2.73123 | 3.46354 | 2.40513 | 3.72494 | 3.29354 | 2.67741 | 2.69355 | 4.24690 | 2.90347 | 2.73739 | 3.18146 | 2.89801 | 2.37887 | 2.77519 | 2.98518 | 4.58477 | 3.61503 |     |   |   |   |   |
|     | 0.03268 | 3.83303 | 4.55537 | 0.61958 | 0.77255 | 0.48576 | 0.95510 |         |         |         |         |         |         |         |         |         |         |         |         |         |     |   |   |   |   |
| 319 | 2.61765 | 4.39623 | 3.28327 | 3.17805 | 4.31966 | 0.79266 | 4.30013 | 3.91025 | 3.35388 | 3.56921 | 4.54515 | 3.44774 | 3.78610 | 3.68127 | 3.59365 | 2.78855 | 3.09584 | 3.44624 | 5.42460 | 4.42045 | 319 | g | - | - | - |
|     | 2.68618 | 4.42225 | 2.77519 | 2.73123 | 3.46354 | 2.40513 | 3.72494 | 3.29354 | 2.67741 | 2.69355 | 4.24690 | 2.90347 | 2.73739 | 3.18146 | 2.89801 | 2.37887 | 2.77519 | 2.98518 | 4.58477 | 3.61503 |     |   |   |   |   |
|     | 0.03268 | 3.83303 | 4.55537 | 0.61958 | 0.77255 | 0.48576 | 0.95510 |         |         |         |         |         |         |         |         |         |         |         |         |         |     |   |   |   |   |
| 320 | 2.96214 | 4.80276 | 3.44889 | 2.96907 | 4.14736 | 3.45685 | 3.79770 | 3.68689 | 2.22438 | 3.21005 | 4.21188 | 3.33151 | 3.96192 | 3.02053 | 1.04043 | 3.04858 | 3.23116 | 3.41270 | 5.24678 | 4.08393 | 320 | r | - | - | - |
|     | 2.68618 | 4.42225 | 2.77519 | 2.73123 | 3.46354 | 2.40513 | 3.72494 | 3.29354 | 2.67741 | 2.69355 | 4.24690 | 2.90347 | 2.73739 | 3.18146 | 2.89801 | 2.37887 | 2.77519 | 2.98518 | 4.58477 | 3.61503 |     |   |   |   |   |
|     | 0.03268 | 3.83303 | 4.55537 | 0.61958 | 0.77255 | 0.48576 | 0.95510 |         |         |         |         |         |         |         |         |         |         |         |         |         |     |   |   |   |   |
| 321 | 3.1165  | 4.58599 | 4.12585 | 3.76620 | 3.12182 | 3.93147 | 4.43434 | 2.32453 | 3.53431 | 0.92536 | 3.15834 | 4.04543 | 4.37407 | 3.91210 | 3.71656 | 3.49871 | 3.40796 | 2.35149 | 4.98612 | 3.70011 | 321 | l | - | - | - |
|     | 2.68618 | 4.42225 | 2.77519 | 2.73123 | 3.46354 | 2.40513 | 3.72494 | 3.29354 | 2.67741 | 2.69355 | 4.24690 | 2.90347 | 2.73739 | 3.18146 | 2.89801 | 2.37887 | 2.77519 | 2.98518 | 4.58477 | 3.61503 |     |   |   |   |   |
|     | 0.03268 | 3.83303 | 4.55537 | 0.61958 | 0.77255 | 0.48576 | 0.95510 |         |         |         |         |         |         |         |         |         |         |         |         |         |     |   |   |   |   |
| 322 | 2.25704 | 4.48151 | 2.78750 | 2.55041 | 4.14958 | 1.86259 | 3.82152 | 3.56794 | 2.66598 | 3.21083 | 4.07394 | 2.97389 | 3.72216 | 2.61482 | 3.03969 | 2.54577 | 2.82382 | 3.16596 | 5.44599 | 4.14831 | 322 | g | - | - | - |
|     | 2.68618 | 4.42225 | 2.77519 | 2.73123 | 3.46354 | 2.40513 | 3.72494 | 3.29354 | 2.67741 | 2.69355 | 4.24690 | 2.90347 | 2.73739 | 3.18146 | 2.89801 | 2.37887 | 2.77519 | 2.98518 | 4.58477 | 3.61503 |     |   |   |   |   |
|     | 0.03268 | 3.83303 | 4.55537 | 0.61958 | 0.77255 | 0.48576 | 0.95510 |         |         |         |         |         |         |         |         |         |         |         |         |         |     |   |   |   |   |
| 323 | 2.88235 | 5.02060 | 2.97356 | 2.55662 | 4.36475 | 3.46181 | 3.59540 | 3.77900 | 1.38955 | 3.28143 | 4.16890 | 3.01438 | 3.90585 | 2.44411 | 2.27202 | 2.88239 | 3.09541 | 3.46410 | 5.39135 | 4.14329 | 323 | k | - | - | - |
|     | 2.68618 | 4.42225 | 2.77519 | 2.73123 | 3.46354 | 2.40513 | 3.72494 | 3.29354 | 2.67741 | 2.69355 | 4.24690 | 2.90347 | 2.73739 | 3.18146 | 2.89801 | 2.37887 | 2.77519 | 2.98518 | 4.58477 | 3.61503 |     |   |   |   |   |
|     | 0.03268 | 3.83303 | 4.55537 | 0.61958 | 0.77255 | 0.48576 | 0.95510 |         |         |         |         |         |         |         |         |         |         |         |         |         |     |   |   |   |   |
| 324 | 3.28721 | 4.68247 | 4.16936 | 3.78810 | 1.78716 | 4.07978 | 3.44718 | 3.07007 | 3.66031 | 2.47715 | 3.70821 | 3.79946 | 4.43049 | 3.79350 | 3.81617 | 3.44017 | 3.52462 | 2.97669 | 3.66742 | 1.19862 | 324 | y | - | - | - |
|     | 2.68618 | 4.42225 | 2.77519 | 2.73123 | 3.46354 | 2.40513 | 3.72494 | 3.29354 | 2.67741 | 2.69355 | 4.24690 | 2.90347 | 2.73739 | 3.18146 | 2.89801 | 2.37887 | 2.77519 | 2.98518 | 4.58477 | 3.61503 |     |   |   |   |   |
|     | 0.03268 | 3.83303 | 4.55537 | 0.61958 | 0.77255 | 0.48576 | 0.95510 |         |         |         |         |         |         |         |         |         |         |         |         |         |     |   |   |   |   |
| 325 | 2.61765 | 4.39623 | 3.28327 | 3.17805 | 4.31966 | 0.79266 | 4.30013 | 3.91025 | 3.35388 | 3.56921 | 4.54515 | 3.44774 | 3.78610 | 3.68127 | 3.59365 | 2.78855 | 3.09584 | 3.44624 | 5.42460 | 4.42045 | 325 | g | - | - | - |
|     | 2.68618 | 4.42225 | 2.77519 | 2.73123 | 3.46354 | 2.40513 | 3.72494 | 3.29354 | 2.67741 | 2.69355 | 4.24690 | 2.90347 | 2.73739 | 3.18146 | 2.89801 | 2.37887 | 2.77519 | 2.98518 | 4.58477 | 3.61503 |     |   |   |   |   |
|     | 0.03268 | 3.83303 | 4.55537 | 0.61958 | 0.77255 | 0.48576 | 0.95510 |         |         |         |         |         |         |         |         |         |         |         |         |         |     |   |   |   |   |
| 326 | 2.77713 | 4.33135 | 4.07016 | 3.73272 | 3.52199 | 3.68239 | 4.54148 | 2.05456 | 3.59987 | 2.21635 | 3.49380 | 3.92869 | 4.24556 | 3.96282 | 3.81605 | 3.18396 | 3.13994 | 1.07623 | 5.29954 | 4.02841 | 326 | v | - | - | - |
|     | 2.68618 | 4.42225 | 2.77519 | 2.73123 | 3.46354 | 2.40513 | 3.72494 | 3.29354 | 2.67741 | 2.69355 | 4.24690 | 2.90347 | 2.73739 | 3.18146 | 2.89801 | 2.37887 | 2.77519 | 2.98518 | 4.58477 | 3.61503 |     |   |   |   |   |
|     | 0.03    |         |         |         |         |         |         |         |         |         |         |         |         |         |         |         |         |         |         |         |     |   |   |   |   |



|     |         |         |         |         |         |         |         |         |         |         |         |         |         |         |         |         |         |         |         |         |     |   |    |
|-----|---------|---------|---------|---------|---------|---------|---------|---------|---------|---------|---------|---------|---------|---------|---------|---------|---------|---------|---------|---------|-----|---|----|
| 354 | 3.27202 | 4.66041 | 4.03210 | 3.72890 | 2.62865 | 3.68698 | 3.85349 | 3.29453 | 3.45219 | 2.69596 | 3.93010 | 3.88606 | 4.20159 | 3.84191 | 3.58729 | 3.47606 | 3.57058 | 3.18378 | 0.96876 | 2.63291 | 354 | w | -- |
|     | 2.68618 | 4.42225 | 2.77519 | 2.73123 | 3.46354 | 2.40513 | 3.72494 | 3.29354 | 2.67741 | 2.69355 | 4.24690 | 2.90347 | 2.73739 | 3.18146 | 2.89801 | 2.37887 | 2.77519 | 2.98518 | 4.58477 | 3.61503 |     |   |    |
|     | 0.03268 | 3.83303 | 4.55537 | 0.61958 | 0.77255 | 0.48576 | 0.95510 |         |         |         |         |         |         |         |         |         |         |         |         |         |     |   |    |
| 355 | 2.70125 | 4.46443 | 3.30428 | 3.13815 | 4.13555 | 3.15421 | 4.21835 | 3.67141 | 3.19219 | 3.30231 | 4.35093 | 3.44851 | 0.90433 | 3.58220 | 3.44165 | 2.86766 | 3.13986 | 3.32122 | 5.33234 | 4.25589 | 355 | p | -- |
|     | 2.68618 | 4.42225 | 2.77519 | 2.73123 | 3.46354 | 2.40513 | 3.72494 | 3.29354 | 2.67741 | 2.69355 | 4.24690 | 2.90347 | 2.73739 | 3.18146 | 2.89801 | 2.37887 | 2.77519 | 2.98518 | 4.58477 | 3.61503 |     |   |    |
|     | 0.03268 | 3.83303 | 4.55537 | 0.61958 | 0.77255 | 0.48576 | 0.95510 |         |         |         |         |         |         |         |         |         |         |         |         |         |     |   |    |
| 356 | 2.65480 | 4.33513 | 3.68798 | 3.24104 | 3.41586 | 3.55668 | 4.12379 | 2.39932 | 3.07121 | 1.62563 | 3.36556 | 3.55080 | 4.05804 | 3.46355 | 3.34428 | 2.93861 | 2.20887 | 2.26966 | 5.09106 | 3.83875 | 356 | l | -- |
|     | 2.68618 | 4.42225 | 2.77519 | 2.73123 | 3.46354 | 2.40513 | 3.72494 | 3.29354 | 2.67741 | 2.69355 | 4.24690 | 2.90347 | 2.73739 | 3.18146 | 2.89801 | 2.37887 | 2.77519 | 2.98518 | 4.58477 | 3.61503 |     |   |    |
|     | 0.03268 | 3.83303 | 4.55537 | 0.61958 | 0.77255 | 0.48576 | 0.95510 |         |         |         |         |         |         |         |         |         |         |         |         |         |     |   |    |
| 357 | 2.28328 | 4.27527 | 3.18195 | 2.87341 | 3.86089 | 1.73562 | 3.95979 | 3.15559 | 2.86610 | 2.51535 | 3.88225 | 3.18628 | 3.74812 | 3.23813 | 3.18726 | 2.54166 | 2.77716 | 2.83074 | 5.28237 | 3.99851 | 357 | g | -- |
|     | 2.68618 | 4.42225 | 2.77519 | 2.73123 | 3.46354 | 2.40513 | 3.72494 | 3.29354 | 2.67741 | 2.69355 | 4.24690 | 2.90347 | 2.73739 | 3.18146 | 2.89801 | 2.37887 | 2.77519 | 2.98518 | 4.58477 | 3.61503 |     |   |    |
|     | 0.03268 | 3.83303 | 4.55537 | 0.61958 | 0.77255 | 0.48576 | 0.95510 |         |         |         |         |         |         |         |         |         |         |         |         |         |     |   |    |
| 358 | 2.69380 | 4.34082 | 3.64321 | 3.28805 | 1.51099 | 2.77082 | 3.84967 | 2.85647 | 3.25731 | 2.48690 | 3.58344 | 3.52340 | 4.01248 | 3.53320 | 3.50568 | 2.92699 | 3.02386 | 2.67377 | 4.44058 | 2.90809 | 358 | f | -- |
|     | 2.68618 | 4.42225 | 2.77519 | 2.73123 | 3.46354 | 2.40513 | 3.72494 | 3.29354 | 2.67741 | 2.69355 | 4.24690 | 2.90347 | 2.73739 | 3.18146 | 2.89801 | 2.37887 | 2.77519 | 2.98518 | 4.58477 | 3.61503 |     |   |    |
|     | 0.03268 | 3.83303 | 4.55537 | 0.61958 | 0.77255 | 0.48576 | 0.95510 |         |         |         |         |         |         |         |         |         |         |         |         |         |     |   |    |
| 359 | 2.16602 | 4.18429 | 3.71446 | 3.18864 | 2.47097 | 3.55749 | 3.95321 | 2.25221 | 3.10965 | 2.25848 | 3.29478 | 3.49088 | 3.99463 | 3.39495 | 3.39305 | 2.75791 | 2.84053 | 2.25703 | 4.79274 | 3.50133 | 359 | a | -- |
|     | 2.68618 | 4.42225 | 2.77519 | 2.73123 | 3.46354 | 2.40513 | 3.72494 | 3.29354 | 2.67741 | 2.69355 | 4.24690 | 2.90347 | 2.73739 | 3.18146 | 2.89801 | 2.37887 | 2.77519 | 2.98518 | 4.58477 | 3.61503 |     |   |    |
|     | 0.03268 | 3.83303 | 4.55537 | 0.61958 | 0.77255 | 0.48576 | 0.95510 |         |         |         |         |         |         |         |         |         |         |         |         |         |     |   |    |
| 360 | 2.96214 | 4.80276 | 3.44889 | 2.96907 | 4.14736 | 3.45685 | 3.79770 | 3.68689 | 2.22438 | 3.21005 | 4.21188 | 3.33151 | 3.96192 | 3.02053 | 1.04043 | 3.04858 | 3.23116 | 3.41270 | 5.24678 | 4.08393 | 360 | r | -- |
|     | 2.68618 | 4.42225 | 2.77519 | 2.73123 | 3.46354 | 2.40513 | 3.72494 | 3.29354 | 2.67741 | 2.69355 | 4.24690 | 2.90347 | 2.73739 | 3.18146 | 2.89801 | 2.37887 | 2.77519 | 2.98518 | 4.58477 | 3.61503 |     |   |    |
|     | 0.03268 | 3.83303 | 4.55537 | 0.61958 | 0.77255 | 0.48576 | 0.95510 |         |         |         |         |         |         |         |         |         |         |         |         |         |     |   |    |
| 361 | 3.00006 | 4.46650 | 4.29746 | 3.81230 | 3.16547 | 4.08204 | 4.52332 | 2.05483 | 3.62287 | 1.20124 | 3.06130 | 4.09095 | 4.44689 | 3.93010 | 3.83674 | 3.46561 | 3.27505 | 1.80060 | 5.10709 | 3.87892 | 361 | l | -- |
|     | 2.68618 | 4.42225 | 2.77519 | 2.73123 | 3.46354 | 2.40513 | 3.72494 | 3.29354 | 2.67741 | 2.69355 | 4.24690 | 2.90347 | 2.73739 | 3.18146 | 2.89801 | 2.37887 | 2.77519 | 2.98518 | 4.58477 | 3.61503 |     |   |    |
|     | 0.03268 | 3.83303 | 4.55537 | 0.61958 | 0.77255 | 0.48576 | 0.95510 |         |         |         |         |         |         |         |         |         |         |         |         |         |     |   |    |
| 362 | 1.80759 | 4.39298 | 2.96281 | 2.63437 | 4.02842 | 3.11015 | 3.81803 | 3.41831 | 2.66506 | 3.08613 | 3.94492 | 3.03027 | 3.71679 | 2.64892 | 3.03416 | 2.08608 | 2.76443 | 3.03810 | 5.35138 | 4.07005 | 362 | a | -- |
|     | 2.68618 | 4.42225 | 2.77519 | 2.73123 | 3.46354 | 2.40513 | 3.72494 | 3.29354 | 2.67741 | 2.69355 | 4.24690 | 2.90347 | 2.73739 | 3.18146 | 2.89801 | 2.37887 | 2.77519 | 2.98518 | 4.58477 | 3.61503 |     |   |    |
|     | 0.03268 | 3.83303 | 4.55537 | 0.61958 | 0.77255 | 0.48576 | 0.95510 |         |         |         |         |         |         |         |         |         |         |         |         |         |     |   |    |
| 363 | 3.11165 | 4.58599 | 4.12585 | 3.76620 | 3.12182 | 3.93147 | 4.43434 | 2.32453 | 3.53431 | 0.92536 | 3.15834 | 4.04543 | 4.37407 | 3.91210 | 3.71656 | 3.49871 | 3.40796 | 2.35149 | 4.98612 | 3.70011 | 363 | l | -- |
|     | 2.68618 | 4.42225 | 2.77519 | 2.73123 | 3.46354 | 2.40513 | 3.72494 | 3.29354 | 2.67741 | 2.69355 | 4.24690 | 2.90347 | 2.73739 | 3.18146 | 2.89801 | 2.37887 | 2.77519 | 2.98518 | 4.58477 | 3.61503 |     |   |    |
|     | 0.03268 | 3.83303 | 4.55537 | 0.61958 | 0.77255 | 0.48576 | 0.95510 |         |         |         |         |         |         |         |         |         |         |         |         |         |     |   |    |
| 364 | 2.70125 | 4.46443 | 3.30428 | 3.13815 | 4.13555 | 3.15421 | 4.21835 | 3.67141 | 3.19219 | 3.30231 | 4.35093 | 3.44851 | 0.90433 | 3.58220 | 3.44165 | 2.86766 | 3.13986 | 3.32122 | 5.33234 | 4.25589 | 364 | p | -- |
|     | 2.68618 | 4.42225 | 2.77519 | 2.73123 | 3.46354 | 2.40513 | 3.72494 | 3.29354 | 2.67741 | 2.69355 | 4.24690 | 2.90347 | 2.73739 | 3.18146 | 2.89801 | 2.37887 | 2.77519 | 2.98518 | 4.58477 | 3.61503 |     |   |    |
|     | 0.03268 | 3.83303 | 4.55537 | 0.61958 | 0.77255 | 0.48576 | 0.95510 |         |         |         |         |         |         |         |         |         |         |         |         |         |     |   |    |
| 365 | 2.70762 | 4.95365 | 1.42076 | 2.21732 | 4.38792 | 3.14514 | 3.76345 | 3.76540 | 2.74445 | 3.44264 | 4.34351 | 2.75966 | 3.76811 | 2.95373 | 3.25987 | 2.69599 | 2.67012 | 3.39914 | 5.66817 | 4.25531 | 365 | d | -- |
|     | 2.68618 | 4.42225 | 2.77519 | 2.73123 | 3.46354 | 2.40513 | 3.72494 | 3.29354 | 2.67741 | 2.69355 | 4.24690 | 2.90347 | 2.73739 | 3.18146 | 2.89801 | 2.37887 | 2.77519 | 2.98518 | 4.58477 | 3.61503 |     |   |    |
|     | 0.03268 | 3.83303 | 4.55537 | 0.61958 | 0.77255 | 0.48576 | 0.95510 |         |         |         |         |         |         |         |         |         |         |         |         |         |     |   |    |
| 366 | 2.79577 | 5.11012 | 4.44899 | 1.72521 | 4.39099 | 3.28196 | 3.63971 | 3.84872 | 2.37766 | 3.38213 | 4.24755 | 2.78957 | 3.81006 | 2.09224 | 2.77351 | 2.75408 | 3.04966 | 3.49894 | 5.55208 | 4.18440 | 366 | e | -- |
|     | 2.68618 | 4.42225 | 2.77519 | 2.73123 | 3.46354 | 2.40513 | 3.72494 | 3.29354 | 2.67741 | 2.69355 | 4.24690 | 2.90347 | 2.73739 | 3.18146 | 2.89801 | 2.37887 | 2.77519 | 2.98518 | 4.58477 | 3.61503 |     |   |    |
|     | 0.03268 | 3.83303 | 4.55537 | 0.61958 | 0.77255 | 0.48576 | 0.95510 |         |         |         |         |         |         |         |         |         |         |         |         |         |     |   |    |
| 367 | 2.76950 | 5.04431 | 2.60125 | 1.64309 | 4.34600 | 3.33075 | 3.60971 | 3.78158 | 2.26768 | 3.31533 | 4.16487 | 2.84183 | 3.81883 | 2.64692 | 2.38177 | 2.74509 | 3.00881 | 3.43699 | 5.47865 | 4.14370 | 367 | e | -- |
|     | 2.68618 | 4.42225 | 2.77519 | 2.73123 | 3.46354 | 2.40513 | 3.72494 | 3.29354 | 2.67741 | 2.69355 | 4.24690 | 2.90347 | 2.73739 | 3.18146 | 2.89801 | 2.37887 | 2.77519 | 2.98518 | 4.58477 | 3.61503 |     |   |    |
|     | 0.03268 | 3.83303 | 4.55537 | 0.61958 | 0.77255 | 0.48576 | 0.95510 |         |         |         |         |         |         |         |         |         |         |         |         |         |     |   |    |
| 368 | 2.86121 | 5.36258 | 1.57988 | 1.60203 | 4.64866 | 3.15977 | 3.69779 | 4.14405 | 2.69960 | 3.67784 | 4.53999 | 2.63722 | 3.77520 | 2.86856 | 3.27302 | 2.75932 | 3.14934 | 3.74024 | 5.83863 | 4.36189 | 368 | d | -- |
|     | 2.68618 | 4.42225 | 2.77519 | 2.73123 | 3.46354 | 2.40513 | 3.72494 | 3.29354 | 2.67741 | 2.69355 | 4.24690 | 2.90347 | 2.73739 | 3.18146 | 2.89801 | 2.37887 | 2.77519 | 2.98518 | 4.58477 | 3.61503 |     |   |    |
|     | 0.03268 | 3.83303 | 4.55537 | 0.61958 | 0.77255 | 0.48576 | 0.95510 |         |         |         |         |         |         |         |         |         |         |         |         |         |     |   |    |
| 369 | 2.44350 | 4.48299 | 3.21728 | 2.72067 | 3.61204 | 3.45729 | 3.75260 | 2.91499 | 2.55440 | 2.51657 | 2.58957 | 3.15796 | 3.88661 | 2.37954 | 2.89186 | 2.75706 | 2.86267 | 2.71891 | 5.06420 | 3.80328 | 369 | q | -- |
|     | 2.68618 | 4.42225 | 2.77519 | 2.73123 | 3.46354 | 2.40513 | 3.72494 | 3.29354 | 2.67741 | 2.69355 | 4.24690 | 2.90347 | 2.73739 | 3.18146 | 2.89801 | 2.37887 | 2.77519 | 2.98518 | 4.58477 | 3.61503 |     |   |    |
|     | 0.03268 | 3.83303 | 4.55537 | 0.61958 | 0.77255 | 0.48576 | 0.95510 |         |         |         |         |         |         |         |         |         |         |         |         |         |     |   |    |
| 370 | 2.24702 | 4.84383 | 2.49814 | 1.57429 | 4.26381 | 3.21197 | 3.73396 | 3.56488 | 2.58466 | 3.25930 | 4.15888 | 2.84087 | 3.78740 | 2.91826 | 3.01516 | 2.69416 | 2.98193 | 3.23441 | 5.53341 | 4.18084 | 370 | e | -- |
|     | 2.68618 | 4.42225 | 2.77519 | 2.73123 | 3.46354 | 2.40513 | 3.72494 | 3.29354 | 2.67741 | 2.69355 | 4.24690 | 2.90347 | 2.73739 | 3.18146 | 2.89801 | 2.37887 | 2.77519 | 2.98518 | 4.58477 | 3.61503 |     |   |    |
|     | 0.03268 | 3.83303 | 4.55537 | 0.61958 | 0.77255 | 0.48576 | 0.95510 |         |         |         |         |         |         |         |         |         |         |         |         |         |     |   |    |
| 371 | 3.27202 | 4.66041 | 4.03210 | 3.72890 | 2.62865 | 3.68698 | 3.85349 | 3.29453 | 3.45219 | 2.69596 | 3.93010 | 3.88606 | 4.20159 | 3.84191 | 3.58729 | 3.47606 | 3.57058 | 3.18378 | 0.96876 | 2.63291 | 371 | w | -- |
|     | 2.68618 | 4.42225 | 2.77519 | 2.73123 | 3.46354 | 2.40513 | 3.72494 | 3.29354 | 2.67741 | 2.69355 | 4.24690 | 2.90347 | 2.73739 | 3.18146 | 2.89801 | 2.37887 | 2.77519 | 2.98518 | 4.58477 | 3.61503 |     |   |    |
|     | 0.03268 | 3.83303 | 4.55537 | 0.61958 | 0.77255 | 0.48576 | 0.95510 |         |         |         |         |         |         |         |         |         |         |         |         |         |     |   |    |
| 372 | 3.26097 | 4.63851 | 4.24683 | 3.86459 | 1.23640 | 4.09979 |         |         |         |         |         |         |         |         |         |         |         |         |         |         |     |   |    |

|     |         |         |         |         |         |         |         |         |         |         |         |         |         |         |         |         |         |         |         |         |     |   |   |   |
|-----|---------|---------|---------|---------|---------|---------|---------|---------|---------|---------|---------|---------|---------|---------|---------|---------|---------|---------|---------|---------|-----|---|---|---|
|     | 2.68618 | 4.42225 | 2.77519 | 2.73123 | 3.46354 | 2.40513 | 3.72494 | 3.29354 | 2.67741 | 2.69355 | 4.24690 | 2.90347 | 2.73739 | 3.18146 | 2.89801 | 2.37887 | 2.77519 | 2.98518 | 4.58477 | 3.61503 |     |   |   |   |
| 377 | 0.03268 | 3.83303 | 4.55537 | 0.61958 | 0.77255 | 0.48576 | 0.95510 |         |         |         |         |         |         |         |         |         |         |         |         |         |     |   |   |   |
|     | 2.70125 | 4.46443 | 3.30428 | 3.13815 | 4.13555 | 3.15421 | 4.21835 | 3.67141 | 3.19219 | 3.30231 | 4.35093 | 3.44851 | 0.90433 | 3.58220 | 3.44165 | 2.86766 | 3.13986 | 3.32122 | 5.33234 | 4.25589 | 377 | p | - | - |
|     | 2.68618 | 4.42225 | 2.77519 | 2.73123 | 3.46354 | 2.40513 | 3.72494 | 3.29354 | 2.67741 | 2.69355 | 4.24690 | 2.90347 | 2.73739 | 3.18146 | 2.89801 | 2.37887 | 2.77519 | 2.98518 | 4.58477 | 3.61503 |     |   |   |   |
| 378 | 0.03268 | 3.83303 | 4.55537 | 0.61958 | 0.77255 | 0.48576 | 0.95510 |         |         |         |         |         |         |         |         |         |         |         |         |         |     |   |   |   |
|     | 2.61765 | 4.39623 | 3.28327 | 3.17805 | 4.31966 | 0.79266 | 4.30013 | 3.91025 | 3.35388 | 3.56921 | 4.54515 | 3.44774 | 3.78610 | 3.68127 | 3.59365 | 2.78855 | 3.09584 | 3.44624 | 5.42460 | 4.42045 | 378 | g | - | - |
|     | 2.68618 | 4.42225 | 2.77519 | 2.73123 | 3.46354 | 2.40513 | 3.72494 | 3.29354 | 2.67741 | 2.69355 | 4.24690 | 2.90347 | 2.73739 | 3.18146 | 2.89801 | 2.37887 | 2.77519 | 2.98518 | 4.58477 | 3.61503 |     |   |   |   |
| 379 | 0.03268 | 3.83303 | 4.55537 | 0.61958 | 0.77255 | 0.48576 | 0.95510 |         |         |         |         |         |         |         |         |         |         |         |         |         |     |   |   |   |
|     | 3.27202 | 4.66041 | 4.03210 | 3.72890 | 2.62865 | 3.68698 | 3.85349 | 3.29453 | 3.45219 | 2.69596 | 3.93010 | 3.88606 | 4.20159 | 3.84191 | 3.58729 | 3.47606 | 3.57058 | 3.18378 | 0.96876 | 2.63291 | 379 | w | - | - |
|     | 2.68618 | 4.42225 | 2.77519 | 2.73123 | 3.46354 | 2.40513 | 3.72494 | 3.29354 | 2.67741 | 2.69355 | 4.24690 | 2.90347 | 2.73739 | 3.18146 | 2.89801 | 2.37887 | 2.77519 | 2.98518 | 4.58477 | 3.61503 |     |   |   |   |
| 380 | 0.03268 | 3.83303 | 4.55537 | 0.61958 | 0.77255 | 0.48576 | 0.95510 |         |         |         |         |         |         |         |         |         |         |         |         |         |     |   |   |   |
|     | 2.11522 | 4.48846 | 2.75592 | 2.58657 | 3.53060 | 3.35666 | 3.70326 | 3.07416 | 2.66047 | 2.77292 | 3.67391 | 3.04620 | 3.82836 | 2.98284 | 3.06250 | 2.68565 | 2.83509 | 2.81119 | 4.97064 | 2.57861 | 380 | a | - | - |
|     | 2.68618 | 4.42225 | 2.77519 | 2.73123 | 3.46354 | 2.40513 | 3.72494 | 3.29354 | 2.67741 | 2.69355 | 4.24690 | 2.90347 | 2.73739 | 3.18146 | 2.89801 | 2.37887 | 2.77519 | 2.98518 | 4.58477 | 3.61503 |     |   |   |   |
| 381 | 0.03268 | 3.83303 | 4.55537 | 0.61958 | 0.77255 | 0.48576 | 0.95510 |         |         |         |         |         |         |         |         |         |         |         |         |         |     |   |   |   |
|     | 2.49537 | 5.08792 | 1.54903 | 2.13297 | 4.48812 | 3.14538 | 3.70699 | 3.95931 | 2.68218 | 3.54101 | 4.39049 | 2.39043 | 3.75481 | 2.88128 | 3.22377 | 2.68401 | 3.03980 | 3.55432 | 5.72512 | 4.27923 | 381 | d | - | - |
|     | 2.68618 | 4.42225 | 2.77519 | 2.73123 | 3.46354 | 2.40513 | 3.72494 | 3.29354 | 2.67741 | 2.69355 | 4.24690 | 2.90347 | 2.73739 | 3.18146 | 2.89801 | 2.37887 | 2.77519 | 2.98518 | 4.58477 | 3.61503 |     |   |   |   |
| 382 | 0.03268 | 3.83303 | 4.55537 | 0.61958 | 0.77255 | 0.48576 | 0.95510 |         |         |         |         |         |         |         |         |         |         |         |         |         |     |   |   |   |
|     | 2.72423 | 4.60671 | 3.22255 | 2.76472 | 3.22419 | 3.49503 | 1.97884 | 3.13627 | 2.51807 | 2.69789 | 3.18721 | 3.17983 | 3.93610 | 3.01485 | 2.82299 | 2.83640 | 2.97834 | 2.92375 | 4.73332 | 3.24750 | 382 | h | - | - |
|     | 2.68618 | 4.42225 | 2.77519 | 2.73123 | 3.46354 | 2.40513 | 3.72494 | 3.29354 | 2.67741 | 2.69355 | 4.24690 | 2.90347 | 2.73739 | 3.18146 | 2.89801 | 2.37887 | 2.77519 | 2.98518 | 4.58477 | 3.61503 |     |   |   |   |
| 383 | 0.03268 | 3.83303 | 4.55537 | 0.61958 | 0.77255 | 0.48576 | 0.95510 |         |         |         |         |         |         |         |         |         |         |         |         |         |     |   |   |   |
|     | 3.19134 | 4.69630 | 3.78054 | 3.50310 | 2.29611 | 3.78460 | 3.60201 | 3.20618 | 3.36176 | 2.67014 | 3.88549 | 3.67575 | 4.25966 | 3.67727 | 3.55331 | 3.33175 | 3.47801 | 3.07495 | 3.93816 | 1.03399 | 383 | y | - | - |
|     | 2.68618 | 4.42225 | 2.77519 | 2.73123 | 3.46354 | 2.40513 | 3.72494 | 3.29354 | 2.67741 | 2.69355 | 4.24690 | 2.90347 | 2.73739 | 3.18146 | 2.89801 | 2.37887 | 2.77519 | 2.98518 | 4.58477 | 3.61503 |     |   |   |   |
| 384 | 0.03268 | 3.83303 | 4.55537 | 0.61958 | 0.77255 | 0.48576 | 0.95510 |         |         |         |         |         |         |         |         |         |         |         |         |         |     |   |   |   |
|     | 2.61765 | 4.39623 | 3.28327 | 3.17805 | 4.31966 | 0.79266 | 4.30013 | 3.91025 | 3.35388 | 3.56921 | 4.54515 | 3.44774 | 3.78610 | 3.68127 | 3.59365 | 2.78855 | 3.09584 | 3.44624 | 5.42460 | 4.42045 | 384 | g | - | - |
|     | 2.68618 | 4.42225 | 2.77519 | 2.73123 | 3.46354 | 2.40513 | 3.72494 | 3.29354 | 2.67741 | 2.69355 | 4.24690 | 2.90347 | 2.73739 | 3.18146 | 2.89801 | 2.37887 | 2.77519 | 2.98518 | 4.58477 | 3.61503 |     |   |   |   |
| 385 | 0.03268 | 3.83303 | 4.55537 | 0.61958 | 0.77255 | 0.48576 | 0.95510 |         |         |         |         |         |         |         |         |         |         |         |         |         |     |   |   |   |
|     | 2.93703 | 4.89791 | 3.11032 | 2.74002 | 4.27531 | 3.43004 | 3.73906 | 3.70226 | 1.09362 | 3.27630 | 4.24050 | 3.16601 | 3.93369 | 2.93324 | 2.42654 | 2.98198 | 3.19357 | 3.41249 | 5.34669 | 4.15401 | 385 | k | - | - |
|     | 2.68618 | 4.42225 | 2.77519 | 2.73123 | 3.46354 | 2.40513 | 3.72494 | 3.29354 | 2.67741 | 2.69355 | 4.24690 | 2.90347 | 2.73739 | 3.18146 | 2.89801 | 2.37887 | 2.77519 | 2.98518 | 4.58477 | 3.61503 |     |   |   |   |
| 386 | 0.03268 | 3.83303 | 4.55537 | 0.61958 | 0.77255 | 0.48576 | 0.95510 |         |         |         |         |         |         |         |         |         |         |         |         |         |     |   |   |   |
|     | 2.97949 | 4.38276 | 4.45250 | 3.98020 | 3.37767 | 4.16698 | 4.72443 | 1.24023 | 3.82807 | 1.90116 | 3.23394 | 4.22901 | 4.53963 | 4.13383 | 4.04498 | 3.56175 | 3.26179 | 1.60514 | 5.31847 | 4.08962 | 386 | i | - | - |
|     | 2.68618 | 4.42225 | 2.77519 | 2.73123 | 3.46354 | 2.40513 | 3.72494 | 3.29354 | 2.67741 | 2.69355 | 4.24690 | 2.90347 | 2.73739 | 3.18146 | 2.89801 | 2.37887 | 2.77519 | 2.98518 | 4.58477 | 3.61503 |     |   |   |   |
| 387 | 0.03268 | 3.83303 | 4.55537 | 0.61958 | 0.77255 | 0.48576 | 0.95510 |         |         |         |         |         |         |         |         |         |         |         |         |         |     |   |   |   |
|     | 3.18010 | 4.58262 | 4.20504 | 3.76132 | 1.78512 | 4.06897 | 3.51656 | 2.89037 | 3.62835 | 2.12506 | 3.53185 | 3.80653 | 4.39604 | 3.76548 | 3.79119 | 3.39387 | 3.40727 | 2.80916 | 3.76138 | 1.45177 | 387 | y | - | - |
|     | 2.68618 | 4.42225 | 2.77519 | 2.73123 | 3.46354 | 2.40513 | 3.72494 | 3.29354 | 2.67741 | 2.69355 | 4.24690 | 2.90347 | 2.73739 | 3.18146 | 2.89801 | 2.37887 | 2.77519 | 2.98518 | 4.58477 | 3.61503 |     |   |   |   |
| 388 | 0.03268 | 3.83303 | 4.55537 | 0.61958 | 0.77255 | 0.48576 | 0.95510 |         |         |         |         |         |         |         |         |         |         |         |         |         |     |   |   |   |
|     | 2.71980 | 5.14244 | 2.22837 | 1.87334 | 4.43626 | 3.24234 | 3.61302 | 3.90473 | 2.45161 | 3.43135 | 4.24418 | 2.17283 | 3.76171 | 2.75825 | 2.71186 | 2.66515 | 2.97466 | 3.51673 | 5.60429 | 4.19082 | 388 | e | - | - |
|     | 2.68618 | 4.42225 | 2.77519 | 2.73123 | 3.46354 | 2.40513 | 3.72494 | 3.29354 | 2.67741 | 2.69355 | 4.24690 | 2.90347 | 2.73739 | 3.18146 | 2.89801 | 2.37887 | 2.77519 | 2.98518 | 4.58477 | 3.61503 |     |   |   |   |
| 389 | 0.03268 | 3.83303 | 4.55537 | 0.61958 | 0.77255 | 0.48576 | 0.95510 |         |         |         |         |         |         |         |         |         |         |         |         |         |     |   |   |   |
|     | 2.91965 | 5.02079 | 2.47306 | 1.08285 | 4.36227 | 3.24954 | 3.83381 | 3.80837 | 2.70946 | 3.43216 | 4.40865 | 2.91254 | 3.85246 | 3.05076 | 3.11366 | 2.90651 | 3.22382 | 3.49656 | 5.54134 | 4.26436 | 389 | e | - | - |
|     | 2.68618 | 4.42225 | 2.77519 | 2.73123 | 3.46354 | 2.40513 | 3.72494 | 3.29354 | 2.67741 | 2.69355 | 4.24690 | 2.90347 | 2.73739 | 3.18146 | 2.89801 | 2.37887 | 2.77519 | 2.98518 | 4.58477 | 3.61503 |     |   |   |   |
| 390 | 0.03268 | 3.83303 | 4.55537 | 0.61958 | 0.77255 | 0.48576 | 0.95510 |         |         |         |         |         |         |         |         |         |         |         |         |         |     |   |   |   |
|     | 3.27202 | 4.66041 | 4.03210 | 3.72890 | 2.62865 | 3.68698 | 3.85349 | 3.29453 | 3.45219 | 2.69596 | 3.93010 | 3.88606 | 4.20159 | 3.84191 | 3.58729 | 3.47606 | 3.57058 | 3.18378 | 0.96876 | 2.63291 | 390 | w | - | - |
|     | 2.68618 | 4.42225 | 2.77519 | 2.73123 | 3.46354 | 2.40513 | 3.72494 | 3.29354 | 2.67741 | 2.69355 | 4.24690 | 2.90347 | 2.73739 | 3.18146 | 2.89801 | 2.37887 | 2.77519 | 2.98518 | 4.58477 | 3.61503 |     |   |   |   |
| 391 | 0.03268 | 3.83303 | 4.55537 | 0.61958 | 0.77255 | 0.48576 | 0.95510 |         |         |         |         |         |         |         |         |         |         |         |         |         |     |   |   |   |
|     | 2.93522 | 5.02259 | 3.31030 | 2.70388 | 4.43168 | 3.55945 | 3.56470 | 3.79667 | 1.48197 | 3.27945 | 4.15766 | 3.11521 | 3.94870 | 2.70946 | 1.67420 | 2.94553 | 3.11915 | 3.48702 | 5.35491 | 4.16723 | 391 | k | - | - |
|     | 2.68618 | 4.42225 | 2.77519 | 2.73123 | 3.46354 | 2.40513 | 3.72494 | 3.29354 | 2.67741 | 2.69355 | 4.24690 | 2.90347 | 2.73739 | 3.18146 | 2.89801 | 2.37887 | 2.77519 | 2.98518 | 4.58477 | 3.61503 |     |   |   |   |
| 392 | 0.03268 | 3.83303 | 4.55537 | 0.61958 | 0.77255 | 0.48576 | 0.95510 |         |         |         |         |         |         |         |         |         |         |         |         |         |     |   |   |   |
|     | 2.02943 | 4.63509 | 2.97078 | 2.52791 | 4.06187 | 3.29826 | 3.66149 | 3.44364 | 2.00195 | 3.06630 | 3.91206 | 2.98592 | 3.78571 | 2.83872 | 2.59174 | 2.40875 | 2.84414 | 3.10907 | 5.29786 | 4.01648 | 392 | k | - | - |
|     | 2.68618 | 4.42225 | 2.77519 | 2.73123 | 3.46354 | 2.40513 | 3.72494 | 3.29354 | 2.67741 | 2.69355 | 4.24690 | 2.90347 | 2.73739 | 3.18146 | 2.89801 | 2.37887 | 2.77519 | 2.98518 | 4.58477 | 3.61503 |     |   |   |   |
| 393 | 0.03268 | 3.83303 | 4.55537 | 0.61958 | 0.77255 | 0.48576 | 0.95510 |         |         |         |         |         |         |         |         |         |         |         |         |         |     |   |   |   |
|     | 2.78009 | 4.52604 | 3.54808 | 3.00938 | 3.43860 | 3.61299 | 3.84223 | 2.78179 | 2.53270 | 1.63204 | 3.46618 | 3.38121 | 4.02863 | 3.13146 | 2.26645 | 2.97517 | 3.02679 | 2.66027 | 4.97725 | 3.69263 | 393 | l | - | - |
|     | 2.68618 | 4.42225 | 2.77519 | 2.73123 | 3.46354 | 2.40513 | 3.72494 | 3.29354 | 2.67741 | 2.69355 | 4.24690 | 2.90347 | 2.73739 | 3.18146 | 2.89801 | 2.37887 | 2.77519 | 2.98518 | 4.58477 | 3.61503 |     |   |   |   |
| 394 | 0.03268 | 3.83303 | 4.55537 | 0.61958 | 0.77255 | 0.48576 | 0.95510 |         |         |         |         |         |         |         |         |         |         |         |         |         |     |   |   |   |
|     | 2.61765 | 4.39623 | 3.28327 | 3.17805 | 4.31966 |         |         |         |         |         |         |         |         |         |         |         |         |         |         |         |     |   |   |   |



|     |         |         |         |         |         |         |         |         |         |         |         |         |         |         |         |         |         |         |         |         |     |   |   |   |   |
|-----|---------|---------|---------|---------|---------|---------|---------|---------|---------|---------|---------|---------|---------|---------|---------|---------|---------|---------|---------|---------|-----|---|---|---|---|
| 421 | 2.29672 | 4.21624 | 3.17324 | 2.98785 | 4.03735 | 2.94690 | 4.09847 | 3.55494 | 3.05893 | 3.27847 | 4.20833 | 3.21852 | 3.68259 | 3.41149 | 3.34573 | 1.15212 | 2.77402 | 3.09870 | 5.41316 | 4.12083 | 421 | s | - | - | - |
|     | 2.68618 | 4.42225 | 2.77519 | 2.73123 | 3.46354 | 2.40513 | 3.72494 | 3.29354 | 2.67741 | 2.69355 | 4.24690 | 2.90347 | 2.73739 | 3.18146 | 2.89801 | 2.37887 | 2.77519 | 2.98518 | 4.58477 | 3.61503 |     |   |   |   |   |
|     | 0.03268 | 3.83303 | 4.55537 | 0.61958 | 0.77255 | 0.48576 | 0.95510 |         |         |         |         |         |         |         |         |         |         |         |         |         |     |   |   |   |   |
| 422 | 2.64384 | 4.74354 | 2.75258 | 2.47790 | 4.10896 | 3.24999 | 3.70328 | 3.62617 | 2.39989 | 3.21017 | 4.10270 | 2.94622 | 3.80271 | 1.74364 | 2.73267 | 2.39445 | 2.95169 | 3.27843 | 5.36875 | 4.02525 | 422 | q | - | - | - |
|     | 2.68618 | 4.42225 | 2.77519 | 2.73123 | 3.46354 | 2.40513 | 3.72494 | 3.29354 | 2.67741 | 2.69355 | 4.24690 | 2.90347 | 2.73739 | 3.18146 | 2.89801 | 2.37887 | 2.77519 | 2.98518 | 4.58477 | 3.61503 |     |   |   |   |   |
|     | 0.03268 | 3.83303 | 4.55537 | 0.61958 | 0.77255 | 0.48576 | 0.95510 |         |         |         |         |         |         |         |         |         |         |         |         |         |     |   |   |   |   |
| 423 | 2.87606 | 4.34702 | 4.23479 | 3.75722 | 2.70830 | 3.95734 | 4.37747 | 2.01849 | 3.65226 | 1.93706 | 3.22436 | 3.99208 | 4.36390 | 3.91099 | 3.87731 | 3.33194 | 3.16084 | 1.32028 | 4.94730 | 3.58783 | 423 | v | - | - | - |
|     | 2.68618 | 4.42225 | 2.77519 | 2.73123 | 3.46354 | 2.40513 | 3.72494 | 3.29354 | 2.67741 | 2.69355 | 4.24690 | 2.90347 | 2.73739 | 3.18146 | 2.89801 | 2.37887 | 2.77519 | 2.98518 | 4.58477 | 3.61503 |     |   |   |   |   |
|     | 0.03268 | 3.83303 | 4.55537 | 0.61958 | 0.77255 | 0.48576 | 0.95510 |         |         |         |         |         |         |         |         |         |         |         |         |         |     |   |   |   |   |
| 424 | 2.70125 | 4.46443 | 3.30428 | 3.13815 | 4.13555 | 3.15421 | 4.21835 | 3.67141 | 3.19219 | 3.30231 | 4.35093 | 3.44851 | 0.90433 | 3.58220 | 3.44165 | 2.86766 | 3.13986 | 3.32122 | 5.33234 | 4.25589 | 424 | p | - | - | - |
|     | 2.68618 | 4.42225 | 2.77519 | 2.73123 | 3.46354 | 2.40513 | 3.72494 | 3.29354 | 2.67741 | 2.69355 | 4.24690 | 2.90347 | 2.73739 | 3.18146 | 2.89801 | 2.37887 | 2.77519 | 2.98518 | 4.58477 | 3.61503 |     |   |   |   |   |
|     | 0.03268 | 3.83303 | 4.55537 | 0.61958 | 0.77255 | 0.48576 | 0.95510 |         |         |         |         |         |         |         |         |         |         |         |         |         |     |   |   |   |   |
| 425 | 3.20912 | 4.62273 | 4.18444 | 3.89199 | 1.07857 | 3.90702 | 3.86137 | 2.73830 | 3.80015 | 2.11778 | 3.47472 | 3.97513 | 4.36694 | 3.97918 | 3.92960 | 3.48072 | 3.51047 | 2.72599 | 4.12320 | 2.49559 | 425 | f | - | - | - |
|     | 2.68618 | 4.42225 | 2.77519 | 2.73123 | 3.46354 | 2.40513 | 3.72494 | 3.29354 | 2.67741 | 2.69355 | 4.24690 | 2.90347 | 2.73739 | 3.18146 | 2.89801 | 2.37887 | 2.77519 | 2.98518 | 4.58477 | 3.61503 |     |   |   |   |   |
|     | 0.03268 | 3.83303 | 4.55537 | 0.61958 | 0.77255 | 0.48576 | 0.95510 |         |         |         |         |         |         |         |         |         |         |         |         |         |     |   |   |   |   |
| 426 | 2.66464 | 2.33714 | 4.21398 | 3.71191 | 3.37060 | 3.69986 | 4.36628 | 1.67695 | 3.55289 | 2.15143 | 3.31881 | 3.87714 | 4.18912 | 3.84302 | 3.75697 | 3.08773 | 2.98157 | 1.89740 | 5.07326 | 3.84119 | 426 | i | - | - | - |
|     | 2.68618 | 4.42225 | 2.77519 | 2.73123 | 3.46354 | 2.40513 | 3.72494 | 3.29354 | 2.67741 | 2.69355 | 4.24690 | 2.90347 | 2.73739 | 3.18146 | 2.89801 | 2.37887 | 2.77519 | 2.98518 | 4.58477 | 3.61503 |     |   |   |   |   |
|     | 0.03268 | 3.83303 | 4.55537 | 0.61958 | 0.77255 | 0.48576 | 0.95510 |         |         |         |         |         |         |         |         |         |         |         |         |         |     |   |   |   |   |
| 427 | 2.70125 | 4.46443 | 3.30428 | 3.13815 | 4.13555 | 3.15421 | 4.21835 | 3.67141 | 3.19219 | 3.30231 | 4.35093 | 3.44851 | 0.90433 | 3.58220 | 3.44165 | 2.86766 | 3.13986 | 3.32122 | 5.33234 | 4.25589 | 427 | p | - | - | - |
|     | 2.68618 | 4.42225 | 2.77519 | 2.73123 | 3.46354 | 2.40513 | 3.72494 | 3.29354 | 2.67741 | 2.69355 | 4.24690 | 2.90347 | 2.73739 | 3.18146 | 2.89801 | 2.37887 | 2.77519 | 2.98518 | 4.58477 | 3.61503 |     |   |   |   |   |
|     | 0.03268 | 3.83303 | 4.55537 | 0.61958 | 0.77255 | 0.48576 | 0.95510 |         |         |         |         |         |         |         |         |         |         |         |         |         |     |   |   |   |   |
| 428 | 2.20861 | 4.14591 | 3.24917 | 2.95840 | 4.08985 | 2.93001 | 4.04641 | 3.42178 | 2.97367 | 3.17682 | 4.05054 | 3.18209 | 3.64596 | 3.31403 | 3.28714 | 1.56016 | 2.02959 | 2.97233 | 5.45737 | 4.21180 | 428 | s | - | - | - |
|     | 2.68618 | 4.42225 | 2.77519 | 2.73123 | 3.46354 | 2.40513 | 3.72494 | 3.29354 | 2.67741 | 2.69355 | 4.24690 | 2.90347 | 2.73739 | 3.18146 | 2.89801 | 2.37887 | 2.77519 | 2.98518 | 4.58477 | 3.61503 |     |   |   |   |   |
|     | 0.03268 | 3.83303 | 4.55537 | 0.61958 | 0.77255 | 0.48576 | 0.95510 |         |         |         |         |         |         |         |         |         |         |         |         |         |     |   |   |   |   |
| 429 | 2.97882 | 4.50000 | 3.97274 | 3.50138 | 2.79602 | 3.93914 | 4.01350 | 2.43431 | 3.28800 | 1.24176 | 3.15765 | 3.78567 | 4.29688 | 3.62938 | 3.51247 | 3.29878 | 3.22396 | 2.42661 | 4.54873 | 2.72140 | 429 | l | - | - | - |
|     | 2.68618 | 4.42225 | 2.77519 | 2.73123 | 3.46354 | 2.40513 | 3.72494 | 3.29354 | 2.67741 | 2.69355 | 4.24690 | 2.90347 | 2.73739 | 3.18146 | 2.89801 | 2.37887 | 2.77519 | 2.98518 | 4.58477 | 3.61503 |     |   |   |   |   |
|     | 0.03268 | 3.83303 | 4.55537 | 0.61958 | 0.77255 | 0.48576 | 0.95510 |         |         |         |         |         |         |         |         |         |         |         |         |         |     |   |   |   |   |
| 430 | 1.27301 | 3.14437 | 3.79065 | 3.41427 | 3.88595 | 2.96426 | 4.25270 | 2.92590 | 3.30774 | 2.88292 | 3.85140 | 3.43503 | 3.69555 | 3.60973 | 3.54460 | 2.41758 | 2.65718 | 2.58774 | 5.36355 | 4.16741 | 430 | a | - | - | - |
|     | 2.68618 | 4.42225 | 2.77519 | 2.73123 | 3.46354 | 2.40513 | 3.72494 | 3.29354 | 2.67741 | 2.69355 | 4.24690 | 2.90347 | 2.73739 | 3.18146 | 2.89801 | 2.37887 | 2.77519 | 2.98518 | 4.58477 | 3.61503 |     |   |   |   |   |
|     | 0.03268 | 3.83303 | 4.55537 | 0.61958 | 0.77255 | 0.48576 | 0.95510 |         |         |         |         |         |         |         |         |         |         |         |         |         |     |   |   |   |   |
| 431 | 2.93703 | 4.89791 | 3.11032 | 2.74002 | 4.27531 | 3.43004 | 3.73906 | 3.70226 | 1.09362 | 3.27630 | 4.24050 | 3.16601 | 3.93369 | 2.93324 | 2.42654 | 2.98198 | 3.19357 | 3.41249 | 5.34669 | 4.15401 | 431 | k | - | - | - |
|     | 2.68618 | 4.42225 | 2.77519 | 2.73123 | 3.46354 | 2.40513 | 3.72494 | 3.29354 | 2.67741 | 2.69355 | 4.24690 | 2.90347 | 2.73739 | 3.18146 | 2.89801 | 2.37887 | 2.77519 | 2.98518 | 4.58477 | 3.61503 |     |   |   |   |   |
|     | 0.03268 | 3.83303 | 4.55537 | 0.61958 | 0.77255 | 0.48576 | 0.95510 |         |         |         |         |         |         |         |         |         |         |         |         |         |     |   |   |   |   |
| 432 | 2.21183 | 3.07555 | 3.62008 | 3.30535 | 4.04724 | 1.30362 | 4.22022 | 3.39717 | 3.24902 | 3.17836 | 4.07699 | 3.38073 | 3.65840 | 3.56517 | 3.49596 | 2.41737 | 2.69749 | 2.95088 | 5.39501 | 4.23437 | 432 | g | - | - | - |
|     | 2.68618 | 4.42225 | 2.77519 | 2.73123 | 3.46354 | 2.40513 | 3.72494 | 3.29354 | 2.67741 | 2.69355 | 4.24690 | 2.90347 | 2.73739 | 3.18146 | 2.89801 | 2.37887 | 2.77519 | 2.98518 | 4.58477 | 3.61503 |     |   |   |   |   |
|     | 0.03268 | 3.83303 | 4.55537 | 0.61958 | 0.77255 | 0.48576 | 0.95510 |         |         |         |         |         |         |         |         |         |         |         |         |         |     |   |   |   |   |
| 433 | 2.20547 | 4.43745 | 2.92273 | 2.37790 | 4.00996 | 3.15081 | 3.77836 | 3.36390 | 2.64467 | 3.05029 | 3.90050 | 2.99899 | 3.72533 | 2.98629 | 3.04496 | 2.05564 | 2.27831 | 3.00374 | 5.33092 | 4.04551 | 433 | s | - | - | - |
|     | 2.68618 | 4.42225 | 2.77519 | 2.73123 | 3.46354 | 2.40513 | 3.72494 | 3.29354 | 2.67741 | 2.69355 | 4.24690 | 2.90347 | 2.73739 | 3.18146 | 2.89801 | 2.37887 | 2.77519 | 2.98518 | 4.58477 | 3.61503 |     |   |   |   |   |
|     | 0.03268 | 3.83303 | 4.55537 | 0.61958 | 0.77255 | 0.48576 | 0.95510 |         |         |         |         |         |         |         |         |         |         |         |         |         |     |   |   |   |   |
| 434 | 2.34404 | 4.26981 | 3.19907 | 2.78271 | 3.83765 | 2.15903 | 3.85560 | 3.20777 | 2.75896 | 2.91414 | 3.11414 | 3.12847 | 3.72225 | 3.10893 | 3.11603 | 2.10473 | 2.71491 | 2.86281 | 5.21734 | 3.95145 | 434 | s | - | - | - |
|     | 2.68618 | 4.42225 | 2.77519 | 2.73123 | 3.46354 | 2.40513 | 3.72494 | 3.29354 | 2.67741 | 2.69355 | 4.24690 | 2.90347 | 2.73739 | 3.18146 | 2.89801 | 2.37887 | 2.77519 | 2.98518 | 4.58477 | 3.61503 |     |   |   |   |   |
|     | 0.03268 | 3.83303 | 4.55537 | 0.61958 | 0.77255 | 0.48576 | 0.95510 |         |         |         |         |         |         |         |         |         |         |         |         |         |     |   |   |   |   |
| 435 | 2.31572 | 4.31315 | 2.99558 | 2.69170 | 4.10425 | 3.02334 | 3.88249 | 3.51043 | 2.76533 | 3.18519 | 4.02669 | 2.62458 | 3.67618 | 3.10678 | 3.13603 | 1.78066 | 2.19387 | 3.07630 | 5.42433 | 4.14656 | 435 | s | - | - | - |
|     | 2.68618 | 4.42225 | 2.77519 | 2.73123 | 3.46354 | 2.40513 | 3.72494 | 3.29354 | 2.67741 | 2.69355 | 4.24690 | 2.90347 | 2.73739 | 3.18146 | 2.89801 | 2.37887 | 2.77519 | 2.98518 | 4.58477 | 3.61503 |     |   |   |   |   |
|     | 0.03268 | 3.83303 | 4.55537 | 0.61958 | 0.77255 | 0.48576 | 0.95510 |         |         |         |         |         |         |         |         |         |         |         |         |         |     |   |   |   |   |
| 436 | 2.71632 | 4.39926 | 3.60326 | 3.19235 | 3.33686 | 3.55517 | 4.06965 | 2.57326 | 3.03246 | 1.36565 | 3.35448 | 3.52392 | 3.12238 | 3.43140 | 3.29962 | 2.97315 | 3.02362 | 2.47605 | 4.99865 | 3.72594 | 436 | l | - | - | - |
|     | 2.68618 | 4.42225 | 2.77519 | 2.73123 | 3.46354 | 2.40513 | 3.72494 | 3.29354 | 2.67741 | 2.69355 | 4.24690 | 2.90347 | 2.73739 | 3.18146 | 2.89801 | 2.37887 | 2.77519 | 2.98518 | 4.58477 | 3.61503 |     |   |   |   |   |
|     | 0.03268 | 3.83303 | 4.55537 | 0.61958 | 0.77255 | 0.48576 | 0.95510 |         |         |         |         |         |         |         |         |         |         |         |         |         |     |   |   |   |   |
| 437 | 2.96214 | 4.80276 | 3.44889 | 2.96907 | 4.14736 | 3.45685 | 3.79770 | 3.68689 | 2.22438 | 3.21005 | 4.21188 | 3.33151 | 3.96192 | 3.02053 | 1.04043 | 3.04858 | 3.23116 | 3.41270 | 5.24678 | 4.08393 | 437 | r | - | - | - |
|     | 2.68618 | 4.42225 | 2.77519 | 2.73123 | 3.46354 | 2.40513 | 3.72494 | 3.29354 | 2.67741 | 2.69355 | 4.24690 | 2.90347 | 2.73739 | 3.18146 | 2.89801 | 2.37887 | 2.77519 | 2.98518 | 4.58477 | 3.61503 |     |   |   |   |   |
|     | 0.03268 | 3.83303 | 4.55537 | 0.61958 | 0.77255 | 0.48576 | 0.95510 |         |         |         |         |         |         |         |         |         |         |         |         |         |     |   |   |   |   |
| 438 | 2.87606 | 4.34702 | 4.23479 | 3.75722 | 2.70830 | 3.95734 | 4.37747 | 2.01849 | 3.65226 | 1.93706 | 3.22436 | 3.99208 | 4.36390 | 3.91099 | 3.87731 | 3.33194 | 3.16084 | 1.32028 | 4.94730 | 3.58783 | 438 | v | - | - | - |
|     | 2.68618 | 4.42225 | 2.77519 | 2.73123 | 3.46354 | 2.40513 | 3.72494 | 3.29354 |         |         |         |         |         |         |         |         |         |         |         |         |     |   |   |   |   |

|     |         |         |         |         |         |         |         |         |         |         |         |         |         |         |         |         |         |         |         |         |     |   |   |   |   |
|-----|---------|---------|---------|---------|---------|---------|---------|---------|---------|---------|---------|---------|---------|---------|---------|---------|---------|---------|---------|---------|-----|---|---|---|---|
|     | 2.68618 | 4.42225 | 2.77519 | 2.73123 | 3.46354 | 2.40513 | 3.72494 | 3.29354 | 2.67741 | 2.69355 | 4.24690 | 2.90347 | 2.73739 | 3.18146 | 2.89801 | 2.37887 | 2.77519 | 2.98518 | 4.58477 | 3.61503 |     |   |   |   |   |
| 444 | 0.03268 | 3.83303 | 4.55537 | 0.61958 | 0.77255 | 0.48576 | 0.95510 |         |         |         |         |         |         |         |         |         |         |         |         |         |     |   |   |   |   |
|     | 2.84332 | 5.07663 | 2.81432 | 2.28650 | 4.42901 | 3.42343 | 3.57730 | 3.82360 | 1.53755 | 3.32596 | 4.17697 | 2.92876 | 3.86896 | 2.43561 | 2.35774 | 2.82148 | 3.05440 | 3.48742 | 5.44693 | 4.17383 | 444 | k | - | - | - |
|     | 2.68618 | 4.42225 | 2.77519 | 2.73123 | 3.46354 | 2.40513 | 3.72494 | 3.29354 | 2.67741 | 2.69355 | 4.24690 | 2.90347 | 2.73739 | 3.18146 | 2.89801 | 2.37887 | 2.77519 | 2.98518 | 4.58477 | 3.61503 |     |   |   |   |   |
| 445 | 0.03268 | 3.83303 | 4.55537 | 0.61958 | 0.77255 | 0.48576 | 0.95510 |         |         |         |         |         |         |         |         |         |         |         |         |         |     |   |   |   |   |
|     | 2.74526 | 4.79809 | 3.22953 | 2.62514 | 4.06565 | 3.50322 | 3.58797 | 3.42254 | 1.62903 | 3.00126 | 3.25297 | 3.07033 | 3.88601 | 2.75196 | 2.18348 | 2.79858 | 2.95301 | 3.14456 | 5.23118 | 3.98563 | 445 | k | - | - | - |
|     | 2.68618 | 4.42225 | 2.77519 | 2.73123 | 3.46354 | 2.40513 | 3.72494 | 3.29354 | 2.67741 | 2.69355 | 4.24690 | 2.90347 | 2.73739 | 3.18146 | 2.89801 | 2.37887 | 2.77519 | 2.98518 | 4.58477 | 3.61503 |     |   |   |   |   |
| 446 | 0.03268 | 3.83303 | 4.55537 | 0.61958 | 0.77255 | 0.48576 | 0.95510 |         |         |         |         |         |         |         |         |         |         |         |         |         |     |   |   |   |   |
|     | 2.89033 | 4.64423 | 3.40056 | 2.98987 | 2.26632 | 3.64223 | 1.82246 | 3.19358 | 2.87278 | 2.69386 | 3.76733 | 3.33464 | 4.07280 | 3.24265 | 3.17835 | 2.99804 | 3.14529 | 3.00453 | 4.16807 | 2.52619 | 446 | h | - | - | - |
|     | 2.68618 | 4.42225 | 2.77519 | 2.73123 | 3.46354 | 2.40513 | 3.72494 | 3.29354 | 2.67741 | 2.69355 | 4.24690 | 2.90347 | 2.73739 | 3.18146 | 2.89801 | 2.37887 | 2.77519 | 2.98518 | 4.58477 | 3.61503 |     |   |   |   |   |
| 447 | 0.03268 | 3.83303 | 4.55537 | 0.61958 | 0.77255 | 0.48576 | 0.95510 |         |         |         |         |         |         |         |         |         |         |         |         |         |     |   |   |   |   |
|     | 1.94377 | 4.11077 | 3.29401 | 2.98907 | 4.12509 | 2.90321 | 4.06816 | 3.43660 | 3.01554 | 3.19486 | 4.05172 | 3.19019 | 3.62688 | 3.33399 | 3.33284 | 1.53770 | 2.28571 | 2.96863 | 5.48521 | 4.26000 | 447 | s | - | - | - |
|     | 2.68618 | 4.42225 | 2.77519 | 2.73123 | 3.46354 | 2.40513 | 3.72494 | 3.29354 | 2.67741 | 2.69355 | 4.24690 | 2.90347 | 2.73739 | 3.18146 | 2.89801 | 2.37887 | 2.77519 | 2.98518 | 4.58477 | 3.61503 |     |   |   |   |   |
| 448 | 0.03268 | 3.83303 | 4.55537 | 0.61958 | 0.77255 | 0.48576 | 0.95510 |         |         |         |         |         |         |         |         |         |         |         |         |         |     |   |   |   |   |
|     | 3.14980 | 4.55087 | 4.39430 | 3.91858 | 1.78697 | 4.18711 | 4.10769 | 2.33204 | 3.77728 | 1.35123 | 3.03811 | 4.09533 | 4.48616 | 3.94670 | 3.93894 | 3.55080 | 3.39063 | 2.38646 | 4.41610 | 2.89487 | 448 | l | - | - | - |
|     | 2.68618 | 4.42225 | 2.77519 | 2.73123 | 3.46354 | 2.40513 | 3.72494 | 3.29354 | 2.67741 | 2.69355 | 4.24690 | 2.90347 | 2.73739 | 3.18146 | 2.89801 | 2.37887 | 2.77519 | 2.98518 | 4.58477 | 3.61503 |     |   |   |   |   |
| 449 | 0.03268 | 3.83303 | 4.55537 | 0.61958 | 0.77255 | 0.48576 | 0.95510 |         |         |         |         |         |         |         |         |         |         |         |         |         |     |   |   |   |   |
|     | 2.21044 | 4.14592 | 3.25552 | 2.95895 | 4.08042 | 2.93456 | 4.04303 | 3.40805 | 2.97033 | 3.16500 | 4.03897 | 3.18370 | 3.64789 | 3.31088 | 3.28430 | 1.62966 | 1.93819 | 2.96327 | 5.44908 | 4.20463 | 449 | s | - | - | - |
|     | 2.68618 | 4.42225 | 2.77519 | 2.73123 | 3.46354 | 2.40513 | 3.72494 | 3.29354 | 2.67741 | 2.69355 | 4.24690 | 2.90347 | 2.73739 | 3.18146 | 2.89801 | 2.37887 | 2.77519 | 2.98518 | 4.58477 | 3.61503 |     |   |   |   |   |
| 450 | 0.03268 | 3.83303 | 4.55537 | 0.61958 | 0.77255 | 0.48576 | 0.95510 |         |         |         |         |         |         |         |         |         |         |         |         |         |     |   |   |   |   |
|     | 2.87759 | 5.33786 | 1.33387 | 1.86786 | 4.63127 | 3.15364 | 3.72174 | 4.12359 | 2.74483 | 3.67936 | 4.56019 | 2.64720 | 3.78205 | 2.90177 | 3.31840 | 2.77979 | 3.17457 | 3.72921 | 5.83535 | 4.36780 | 450 | d | - | - | - |
|     | 2.68618 | 4.42225 | 2.77519 | 2.73123 | 3.46354 | 2.40513 | 3.72494 | 3.29354 | 2.67741 | 2.69355 | 4.24690 | 2.90347 | 2.73739 | 3.18146 | 2.89801 | 2.37887 | 2.77519 | 2.98518 | 4.58477 | 3.61503 |     |   |   |   |   |
| 451 | 0.03268 | 3.83303 | 4.55537 | 0.61958 | 0.77255 | 0.48576 | 0.95510 |         |         |         |         |         |         |         |         |         |         |         |         |         |     |   |   |   |   |
|     | 2.71287 | 5.10136 | 1.82269 | 2.16084 | 4.41211 | 3.21626 | 3.63998 | 3.89188 | 2.52064 | 3.43173 | 4.25769 | 2.72043 | 3.13503 | 2.32168 | 3.02618 | 2.66567 | 2.98291 | 3.50452 | 5.61220 | 4.19353 | 451 | d | - | - | - |
|     | 2.68618 | 4.42225 | 2.77519 | 2.73123 | 3.46354 | 2.40513 | 3.72494 | 3.29354 | 2.67741 | 2.69355 | 4.24690 | 2.90347 | 2.73739 | 3.18146 | 2.89801 | 2.37887 | 2.77519 | 2.98518 | 4.58477 | 3.61503 |     |   |   |   |   |
| 452 | 0.03268 | 3.83303 | 4.55537 | 0.61958 | 0.77255 | 0.48576 | 0.95510 |         |         |         |         |         |         |         |         |         |         |         |         |         |     |   |   |   |   |
|     | 3.20630 | 4.63349 | 4.10661 | 3.68461 | 2.06886 | 3.99217 | 3.46070 | 3.12413 | 3.44188 | 2.54856 | 3.71924 | 3.74111 | 4.35515 | 3.69093 | 3.60684 | 3.36753 | 3.44015 | 3.00025 | 1.68288 | 1.81536 | 452 | w | - | - | - |
|     | 2.68618 | 4.42225 | 2.77519 | 2.73123 | 3.46354 | 2.40513 | 3.72494 | 3.29354 | 2.67741 | 2.69355 | 4.24690 | 2.90347 | 2.73739 | 3.18146 | 2.89801 | 2.37887 | 2.77519 | 2.98518 | 4.58477 | 3.61503 |     |   |   |   |   |
| 453 | 0.03268 | 3.83303 | 4.55537 | 0.61958 | 0.77255 | 0.48576 | 0.95510 |         |         |         |         |         |         |         |         |         |         |         |         |         |     |   |   |   |   |
|     | 2.61765 | 4.39623 | 3.28327 | 3.17805 | 4.31966 | 0.79266 | 4.30013 | 3.91025 | 3.35388 | 3.56921 | 4.54515 | 3.44774 | 3.78610 | 3.68127 | 3.59365 | 2.78855 | 3.09584 | 3.44624 | 5.42460 | 4.42045 | 453 | g | - | - | - |
|     | 2.68618 | 4.42225 | 2.77519 | 2.73123 | 3.46354 | 2.40513 | 3.72494 | 3.29354 | 2.67741 | 2.69355 | 4.24690 | 2.90347 | 2.73739 | 3.18146 | 2.89801 | 2.37887 | 2.77519 | 2.98518 | 4.58477 | 3.61503 |     |   |   |   |   |
| 454 | 0.03268 | 3.83303 | 4.55537 | 0.61958 | 0.77255 | 0.48576 | 0.95510 |         |         |         |         |         |         |         |         |         |         |         |         |         |     |   |   |   |   |
|     | 2.91965 | 5.02079 | 2.47306 | 1.08285 | 4.36227 | 3.24954 | 3.83381 | 3.80837 | 2.70946 | 3.43216 | 4.40865 | 2.91254 | 3.85246 | 3.05076 | 3.11366 | 2.90651 | 3.22382 | 3.49656 | 5.54134 | 4.26436 | 454 | e | - | - | - |
|     | 2.68618 | 4.42225 | 2.77519 | 2.73123 | 3.46354 | 2.40513 | 3.72494 | 3.29354 | 2.67741 | 2.69355 | 4.24690 | 2.90347 | 2.73739 | 3.18146 | 2.89801 | 2.37887 | 2.77519 | 2.98518 | 4.58477 | 3.61503 |     |   |   |   |   |
| 455 | 0.03268 | 3.83303 | 4.55537 | 0.61958 | 0.77255 | 0.48576 | 0.95510 |         |         |         |         |         |         |         |         |         |         |         |         |         |     |   |   |   |   |
|     | 2.96214 | 4.80276 | 3.44889 | 2.96907 | 4.14736 | 3.45685 | 3.79770 | 3.68689 | 2.22438 | 3.21005 | 4.21188 | 3.33151 | 3.96192 | 3.02053 | 1.04043 | 3.04858 | 3.23116 | 3.41270 | 5.24678 | 4.08393 | 455 | r | - | - | - |
|     | 2.68618 | 4.42225 | 2.77519 | 2.73123 | 3.46354 | 2.40513 | 3.72494 | 3.29354 | 2.67741 | 2.69355 | 4.24690 | 2.90347 | 2.73739 | 3.18146 | 2.89801 | 2.37887 | 2.77519 | 2.98518 | 4.58477 | 3.61503 |     |   |   |   |   |
| 456 | 0.03268 | 3.83303 | 4.55537 | 0.61958 | 0.77255 | 0.48576 | 0.95510 |         |         |         |         |         |         |         |         |         |         |         |         |         |     |   |   |   |   |
|     | 2.69767 | 4.54958 | 3.27264 | 2.78731 | 3.52708 | 3.52748 | 3.78424 | 2.88666 | 2.54762 | 2.37684 | 2.40666 | 3.21934 | 3.94760 | 2.27356 | 2.85744 | 2.84811 | 2.94477 | 2.74532 | 5.04303 | 3.76374 | 456 | q | - | - | - |
|     | 2.68618 | 4.42225 | 2.77519 | 2.73123 | 3.46354 | 2.40513 | 3.72494 | 3.29354 | 2.67741 | 2.69355 | 4.24690 | 2.90347 | 2.73739 | 3.18146 | 2.89801 | 2.37887 | 2.77519 | 2.98518 | 4.58477 | 3.61503 |     |   |   |   |   |
| 457 | 0.03268 | 3.83303 | 4.55537 | 0.61958 | 0.77255 | 0.48576 | 0.95510 |         |         |         |         |         |         |         |         |         |         |         |         |         |     |   |   |   |   |
|     | 3.27202 | 4.66041 | 4.03210 | 3.72890 | 2.62865 | 3.68698 | 3.85349 | 3.29453 | 3.45219 | 2.69596 | 3.93010 | 3.88606 | 4.20159 | 3.84191 | 3.58729 | 3.47606 | 3.57058 | 3.18378 | 0.96876 | 2.63291 | 457 | w | - | - | - |
|     | 2.68618 | 4.42225 | 2.77519 | 2.73123 | 3.46354 | 2.40513 | 3.72494 | 3.29354 | 2.67741 | 2.69355 | 4.24690 | 2.90347 | 2.73739 | 3.18146 | 2.89801 | 2.37887 | 2.77519 | 2.98518 | 4.58477 | 3.61503 |     |   |   |   |   |
| 458 | 0.03268 | 3.83303 | 4.55537 | 0.61958 | 0.77255 | 0.48576 | 0.95510 |         |         |         |         |         |         |         |         |         |         |         |         |         |     |   |   |   |   |
|     | 3.11165 | 4.58599 | 4.12585 | 3.76620 | 3.12182 | 3.93147 | 4.43434 | 2.32453 | 3.53431 | 0.92536 | 3.15834 | 4.04543 | 4.37407 | 3.91210 | 3.71656 | 3.49871 | 3.40796 | 2.35149 | 4.98612 | 3.70011 | 458 | l | - | - | - |
|     | 2.68618 | 4.42225 | 2.77519 | 2.73123 | 3.46354 | 2.40513 | 3.72494 | 3.29354 | 2.67741 | 2.69355 | 4.24690 | 2.90347 | 2.73739 | 3.18146 | 2.89801 | 2.37887 | 2.77519 | 2.98518 | 4.58477 | 3.61503 |     |   |   |   |   |
| 459 | 0.03268 | 3.83303 | 4.55537 | 0.61958 | 0.77255 | 0.48576 | 0.95510 |         |         |         |         |         |         |         |         |         |         |         |         |         |     |   |   |   |   |
|     | 2.30261 | 4.39107 | 3.15252 | 2.67756 | 3.69626 | 3.32654 | 3.74614 | 2.59432 | 2.61797 | 2.73328 | 3.62811 | 3.10230 | 3.80572 | 2.70698 | 2.98748 | 2.17741 | 2.77624 | 2.74092 | 5.08659 | 3.81943 | 459 | s | - | - | - |
|     | 2.68618 | 4.42225 | 2.77519 | 2.73123 | 3.46354 | 2.40513 | 3.72494 | 3.29354 | 2.67741 | 2.69355 | 4.24690 | 2.90347 | 2.73739 | 3.18146 | 2.89801 | 2.37887 | 2.77519 | 2.98518 | 4.58477 | 3.61503 |     |   |   |   |   |
| 460 | 0.03268 | 3.83303 | 4.55537 | 0.61958 | 0.77255 | 0.48576 | 0.95510 |         |         |         |         |         |         |         |         |         |         |         |         |         |     |   |   |   |   |
|     | 2.91965 | 5.02079 | 2.47306 | 1.08285 | 4.36227 | 3.24954 | 3.83381 | 3.80837 | 2.70946 | 3.43216 | 4.40865 | 2.91254 | 3.85246 | 3.05076 | 3.11366 | 2.90651 | 3.22382 | 3.49656 | 5.54134 | 4.26436 | 460 | e | - | - | - |
|     | 2.68618 | 4.42225 | 2.77519 | 2.73123 | 3.46354 | 2.40513 | 3.72494 | 3.29354 | 2.67741 | 2.69355 | 4.24690 | 2.90347 | 2.73739 | 3.18146 | 2.89801 |         |         |         |         |         |     |   |   |   |   |



|     |         |         |         |         |         |         |         |         |         |         |         |         |         |         |         |         |         |         |         |         |     |   |   |   |   |
|-----|---------|---------|---------|---------|---------|---------|---------|---------|---------|---------|---------|---------|---------|---------|---------|---------|---------|---------|---------|---------|-----|---|---|---|---|
| 488 | 2.89702 | 4.36953 | 4.25107 | 3.78862 | 3.36325 | 3.98788 | 4.54868 | 1.91784 | 3.61819 | 1.80707 | 3.27836 | 4.04489 | 4.41114 | 3.95852 | 3.84999 | 3.38537 | 3.19322 | 1.24951 | 5.22954 | 3.96184 | 488 | v | - | - | - |
|     | 2.68618 | 4.42225 | 2.77519 | 2.73123 | 3.46354 | 2.40513 | 3.72494 | 3.29354 | 2.67741 | 2.69355 | 4.24690 | 2.90347 | 2.73739 | 3.18146 | 2.89801 | 2.37887 | 2.77519 | 2.98518 | 4.58477 | 3.61503 |     |   |   |   |   |
|     | 0.03268 | 3.83303 | 4.55537 | 0.61958 | 0.77255 | 0.48576 | 0.95510 |         |         |         |         |         |         |         |         |         |         |         |         |         |     |   |   |   |   |
| 489 | 2.96214 | 4.80276 | 3.44889 | 2.96907 | 4.14736 | 3.45685 | 3.79770 | 3.68689 | 2.22438 | 3.21005 | 4.21188 | 3.33151 | 3.96192 | 3.02053 | 1.04043 | 3.04858 | 3.23116 | 3.41270 | 5.24678 | 4.08393 | 489 | r | - | - | - |
|     | 2.68618 | 4.42225 | 2.77519 | 2.73123 | 3.46354 | 2.40513 | 3.72494 | 3.29354 | 2.67741 | 2.69355 | 4.24690 | 2.90347 | 2.73739 | 3.18146 | 2.89801 | 2.37887 | 2.77519 | 2.98518 | 4.58477 | 3.61503 |     |   |   |   |   |
|     | 0.03268 | 3.83303 | 4.55537 | 0.61958 | 0.77255 | 0.48576 | 0.95510 |         |         |         |         |         |         |         |         |         |         |         |         |         |     |   |   |   |   |
| 490 | 2.00928 | 4.13755 | 3.20261 | 2.97665 | 4.13564 | 2.89492 | 4.09397 | 3.49720 | 3.04523 | 3.25424 | 4.13807 | 3.18334 | 3.63593 | 3.37313 | 3.34871 | 1.32846 | 2.67722 | 3.02023 | 5.50996 | 4.25179 | 490 | s | - | - | - |
|     | 2.68618 | 4.42225 | 2.77519 | 2.73123 | 3.46354 | 2.40513 | 3.72494 | 3.29354 | 2.67741 | 2.69355 | 4.24690 | 2.90347 | 2.73739 | 3.18146 | 2.89801 | 2.37887 | 2.77519 | 2.98518 | 4.58477 | 3.61503 |     |   |   |   |   |
|     | 0.03268 | 3.83303 | 4.55537 | 0.61958 | 0.77255 | 0.48576 | 0.95510 |         |         |         |         |         |         |         |         |         |         |         |         |         |     |   |   |   |   |
| 491 | 2.94831 | 5.06869 | 0.97632 | 2.31258 | 4.44069 | 3.18175 | 3.89799 | 4.02012 | 2.97493 | 3.63580 | 4.61368 | 2.86669 | 3.83184 | 3.13755 | 3.48525 | 2.91560 | 3.28628 | 3.66374 | 5.61691 | 4.32095 | 491 | d | - | - | - |
|     | 2.68618 | 4.42225 | 2.77519 | 2.73123 | 3.46354 | 2.40513 | 3.72494 | 3.29354 | 2.67741 | 2.69355 | 4.24690 | 2.90347 | 2.73739 | 3.18146 | 2.89801 | 2.37887 | 2.77519 | 2.98518 | 4.58477 | 3.61503 |     |   |   |   |   |
|     | 0.03268 | 3.83303 | 4.55537 | 0.61958 | 0.77255 | 0.48576 | 0.95510 |         |         |         |         |         |         |         |         |         |         |         |         |         |     |   |   |   |   |
| 492 | 2.61765 | 4.39623 | 3.28327 | 3.17805 | 4.31966 | 0.79266 | 4.30013 | 3.91025 | 3.35388 | 3.56921 | 4.54515 | 3.44774 | 3.78610 | 3.68127 | 3.59365 | 2.78855 | 3.09584 | 3.44624 | 5.42460 | 4.42045 | 492 | g | - | - | - |
|     | 2.68618 | 4.42225 | 2.77519 | 2.73123 | 3.46354 | 2.40513 | 3.72494 | 3.29354 | 2.67741 | 2.69355 | 4.24690 | 2.90347 | 2.73739 | 3.18146 | 2.89801 | 2.37887 | 2.77519 | 2.98518 | 4.58477 | 3.61503 |     |   |   |   |   |
|     | 0.03268 | 3.83303 | 4.55537 | 0.61958 | 0.77255 | 0.48576 | 0.95510 |         |         |         |         |         |         |         |         |         |         |         |         |         |     |   |   |   |   |
| 493 | 2.93703 | 4.89791 | 3.11032 | 2.74002 | 4.27531 | 3.43004 | 3.73906 | 3.70226 | 1.09362 | 3.27630 | 4.24050 | 3.16601 | 3.93369 | 2.93324 | 2.42654 | 2.98198 | 3.19357 | 3.41249 | 5.34669 | 4.15401 | 493 | k | - | - | - |
|     | 2.68618 | 4.42225 | 2.77519 | 2.73123 | 3.46354 | 2.40513 | 3.72494 | 3.29354 | 2.67741 | 2.69355 | 4.24690 | 2.90347 | 2.73739 | 3.18146 | 2.89801 | 2.37887 | 2.77519 | 2.98518 | 4.58477 | 3.61503 |     |   |   |   |   |
|     | 0.03268 | 3.83303 | 4.55537 | 0.61958 | 0.77255 | 0.48576 | 0.95510 |         |         |         |         |         |         |         |         |         |         |         |         |         |     |   |   |   |   |
| 494 | 2.39269 | 4.23746 | 3.39425 | 3.14521 | 3.93517 | 3.07784 | 4.16539 | 3.05754 | 3.08739 | 2.92240 | 3.97601 | 3.36046 | 3.77873 | 3.48436 | 3.34758 | 2.59359 | 1.24059 | 2.75673 | 5.37648 | 4.15199 | 494 | t | - | - | - |
|     | 2.68618 | 4.42225 | 2.77519 | 2.73123 | 3.46354 | 2.40513 | 3.72494 | 3.29354 | 2.67741 | 2.69355 | 4.24690 | 2.90347 | 2.73739 | 3.18146 | 2.89801 | 2.37887 | 2.77519 | 2.98518 | 4.58477 | 3.61503 |     |   |   |   |   |
|     | 0.03268 | 3.83303 | 4.55537 | 0.61958 | 0.77255 | 0.48576 | 0.95510 |         |         |         |         |         |         |         |         |         |         |         |         |         |     |   |   |   |   |
| 495 | 3.11165 | 4.58599 | 4.12585 | 3.76620 | 3.12182 | 3.93147 | 4.43434 | 2.32453 | 3.53431 | 0.92536 | 3.15834 | 4.04543 | 4.37407 | 3.91210 | 3.71656 | 3.49871 | 3.40796 | 2.35149 | 4.98612 | 3.70011 | 495 | l | - | - | - |
|     | 2.68618 | 4.42225 | 2.77519 | 2.73123 | 3.46354 | 2.40513 | 3.72494 | 3.29354 | 2.67741 | 2.69355 | 4.24690 | 2.90347 | 2.73739 | 3.18146 | 2.89801 | 2.37887 | 2.77519 | 2.98518 | 4.58477 | 3.61503 |     |   |   |   |   |
|     | 0.03268 | 3.83303 | 4.55537 | 0.61958 | 0.77255 | 0.48576 | 0.95510 |         |         |         |         |         |         |         |         |         |         |         |         |         |     |   |   |   |   |
| 496 | 3.02617 | 4.42174 | 4.44914 | 3.92784 | 3.23346 | 4.22538 |         | 1.32984 | 3.75728 | 1.72151 | 2.67581 | 4.20743 | 4.53104 | 4.03743 | 3.96502 | 3.58482 | 3.27910 | 1.85040 | 5.18446 | 3.99861 | 496 | i | - | - | - |
|     | 2.68618 | 4.42225 | 2.77519 | 2.73123 | 3.46354 | 2.40513 | 3.72494 | 3.29354 | 2.67741 | 2.69355 | 4.24690 | 2.90347 | 2.73739 | 3.18146 | 2.89801 | 2.37887 | 2.77519 | 2.98518 | 4.58477 | 3.61503 |     |   |   |   |   |
|     | 0.03268 | 3.83303 | 4.55537 | 0.61958 | 0.77255 | 0.48576 | 0.95510 |         |         |         |         |         |         |         |         |         |         |         |         |         |     |   |   |   |   |
| 497 | 1.34986 | 4.08260 | 3.27419 | 3.01899 | 4.15975 | 2.53320 | 4.11089 | 3.51876 | 3.09641 | 3.25674 | 4.10171 | 3.19448 | 3.60946 | 3.39092 | 3.40402 | 2.10215 | 2.63092 | 3.01421 | 5.51808 | 4.29977 | 497 | a | - | - | - |
|     | 2.68618 | 4.42225 | 2.77519 | 2.73123 | 3.46354 | 2.40513 | 3.72494 | 3.29354 | 2.67741 | 2.69355 | 4.24690 | 2.90347 | 2.73739 | 3.18146 | 2.89801 | 2.37887 | 2.77519 | 2.98518 | 4.58477 | 3.61503 |     |   |   |   |   |
|     | 0.03268 | 3.83303 | 4.55537 | 0.61958 | 0.77255 | 0.48576 | 0.95510 |         |         |         |         |         |         |         |         |         |         |         |         |         |     |   |   |   |   |
| 498 | 2.85084 | 4.83409 | 2.87832 | 2.63320 | 3.99721 | 3.34074 | 3.79090 | 3.62260 | 2.45691 | 3.12880 | 4.15852 | 3.09230 | 3.89411 | 1.30591 | 2.74155 | 2.90061 | 3.14819 | 3.35495 | 5.27660 | 3.96796 | 498 | q | - | - | - |
|     | 2.68618 | 4.42225 | 2.77519 | 2.73123 | 3.46354 | 2.40513 | 3.72494 | 3.29354 | 2.67741 | 2.69355 | 4.24690 | 2.90347 | 2.73739 | 3.18146 | 2.89801 | 2.37887 | 2.77519 | 2.98518 | 4.58477 | 3.61503 |     |   |   |   |   |
|     | 0.03268 | 3.83303 | 4.55537 | 0.61958 | 0.77255 | 0.48576 | 0.95510 |         |         |         |         |         |         |         |         |         |         |         |         |         |     |   |   |   |   |
| 499 | 2.70125 | 4.46443 | 3.30428 | 3.13815 | 4.13555 | 3.15421 | 4.21835 | 3.67141 | 3.19219 | 3.30231 | 4.35093 | 3.44851 | 0.90433 | 3.58220 | 3.44165 | 2.86766 | 3.13986 | 3.32122 | 5.33234 | 4.25589 | 499 | p | - | - | - |
|     | 2.68618 | 4.42225 | 2.77519 | 2.73123 | 3.46354 | 2.40513 | 3.72494 | 3.29354 | 2.67741 | 2.69355 | 4.24690 | 2.90347 | 2.73739 | 3.18146 | 2.89801 | 2.37887 | 2.77519 | 2.98518 | 4.58477 | 3.61503 |     |   |   |   |   |
|     | 0.03268 | 3.83303 | 4.55537 | 0.61958 | 0.77255 | 0.48576 | 0.95510 |         |         |         |         |         |         |         |         |         |         |         |         |         |     |   |   |   |   |
| 500 | 2.95371 | 4.77708 | 3.08911 | 2.84570 | 3.25855 | 3.41543 | 1.22850 | 3.65045 | 2.68990 | 3.14913 | 4.18951 | 3.25638 | 3.96612 | 3.21160 | 2.95766 | 3.02494 | 3.25600 | 3.38639 | 4.72403 | 3.21065 | 500 | h | - | - | - |
|     | 2.68618 | 4.42225 | 2.77519 | 2.73123 | 3.46354 | 2.40513 | 3.72494 | 3.29354 | 2.67741 | 2.69355 | 4.24690 | 2.90347 | 2.73739 | 3.18146 | 2.89801 | 2.37887 | 2.77519 | 2.98518 | 4.58477 | 3.61503 |     |   |   |   |   |
|     | 0.03268 | 3.83303 | 4.55537 | 0.61958 | 0.77255 | 0.48576 | 0.95510 |         |         |         |         |         |         |         |         |         |         |         |         |         |     |   |   |   |   |
| 501 | 2.64659 | 4.26585 | 3.84209 | 3.34167 | 3.48845 | 3.63710 | 4.21033 | 2.16265 | 3.21630 | 2.06097 | 3.38787 | 3.64041 | 4.11354 | 3.55898 | 3.50308 | 2.98964 | 2.29612 | 1.64680 | 5.15437 | 3.92552 | 501 | v | - | - | - |
|     | 2.68618 | 4.42225 | 2.77519 | 2.73123 | 3.46354 | 2.40513 | 3.72494 | 3.29354 | 2.67741 | 2.69355 | 4.24690 | 2.90347 | 2.73739 | 3.18146 | 2.89801 | 2.37887 | 2.77519 | 2.98518 | 4.58477 | 3.61503 |     |   |   |   |   |
|     | 0.03268 | 3.83303 | 4.55537 | 0.61958 | 0.77255 | 0.48576 | 0.95510 |         |         |         |         |         |         |         |         |         |         |         |         |         |     |   |   |   |   |
| 502 | 2.56925 | 4.84941 | 3.20082 | 2.65631 | 4.25214 | 3.46851 | 3.60150 | 3.60262 | 1.90416 | 3.16279 | 4.03826 | 3.08013 | 3.89529 | 2.76000 | 1.61126 | 2.83217 | 3.01355 | 3.29366 | 5.32043 | 4.09866 | 502 | r | - | - | - |
|     | 2.68618 | 4.42225 | 2.77519 | 2.73123 | 3.46354 | 2.40513 | 3.72494 | 3.29354 | 2.67741 | 2.69355 | 4.24690 | 2.90347 | 2.73739 | 3.18146 | 2.89801 | 2.37887 | 2.77519 | 2.98518 | 4.58477 | 3.61503 |     |   |   |   |   |
|     | 0.03268 | 3.83303 | 4.55537 | 0.61958 | 0.77255 | 0.48576 | 0.95510 |         |         |         |         |         |         |         |         |         |         |         |         |         |     |   |   |   |   |
| 503 | 2.44017 | 4.48072 | 2.79776 | 2.55256 | 4.18254 | 1.87577 | 3.81530 | 3.60895 | 2.39380 | 3.24591 | 4.09338 | 2.97262 | 3.71713 | 3.02342 | 3.00650 | 2.26318 | 2.81826 | 3.19130 | 5.45904 | 4.16589 | 503 | g | - | - | - |
|     | 2.68618 | 4.42225 | 2.77519 | 2.73123 | 3.46354 | 2.40513 | 3.72494 | 3.29354 | 2.67741 | 2.69355 | 4.24690 | 2.90347 | 2.73739 | 3.18146 | 2.89801 | 2.37887 | 2.77519 | 2.98518 | 4.58477 | 3.61503 |     |   |   |   |   |
|     | 0.03268 | 3.83303 | 4.55537 | 0.61958 | 0.77255 | 0.48576 | 0.95510 |         |         |         |         |         |         |         |         |         |         |         |         |         |     |   |   |   |   |
| 504 | 2.62047 | 4.86359 | 1.64640 | 2.23659 | 4.36101 | 3.13853 | 3.72664 | 3.77494 | 2.66815 | 3.40637 | 4.25443 | 2.76730 | 3.74016 | 2.90431 | 3.17309 | 2.41863 | 2.58471 | 3.37838 | 5.62289 | 4.22285 | 504 | d | - | - | - |
|     | 2.68618 | 4.42225 | 2.77519 | 2.73123 | 3.46354 | 2.40507 | 3.72495 | 3.29354 | 2.67741 | 2.69355 | 4.24690 | 2.90347 | 2.73740 | 3.18147 | 2.89801 | 2.37887 | 2.77520 | 2.98519 | 4.58477 | 3.61503 |     |   |   |   |   |
|     | 0.08092 | 2.69977 | 4.55537 | 0.48428 | 0.95747 | 0.48576 | 0.95510 |         |         |         |         |         |         |         |         |         |         |         |         |         |     |   |   |   |   |
| 505 | 2.73184 | 5.11135 | 2.18766 | 2.18296 | 4.42080 | 3.23919 | 3.62956 | 3.89069 | 2.09796 | 3.42897 | 4.25418 | 2.03675 | 3.77132 | 2.78246 | 2.91898 | 2.68448 | 2.99394 | 3.50827 | 5.59555 | 4.19192 | 505 | n | - | - | - |
|     | 2.68618 | 4.42225 | 2.77519 | 2.73123 | 3.46354 | 2.40513 | 3.72494 | 3.29354 | 2.67    |         |         |         |         |         |         |         |         |         |         |         |     |   |   |   |   |

|     |         |         |         |         |         |         |         |         |         |         |         |         |         |         |         |         |         |         |         |         |     |   |   |   |
|-----|---------|---------|---------|---------|---------|---------|---------|---------|---------|---------|---------|---------|---------|---------|---------|---------|---------|---------|---------|---------|-----|---|---|---|
|     | 2.68618 | 4.42225 | 2.77519 | 2.73123 | 3.46354 | 2.40513 | 3.72494 | 3.29354 | 2.67741 | 2.69355 | 4.24690 | 2.90347 | 2.73739 | 3.18146 | 2.89801 | 2.37887 | 2.77519 | 2.98518 | 4.58477 | 3.61503 |     |   |   |   |
| 511 | 0.03268 | 3.83303 | 4.55537 | 0.61958 | 0.77255 | 0.48576 | 0.95510 |         |         |         |         |         |         |         |         |         |         |         |         |         |     |   |   |   |
|     | 2.94831 | 5.06869 | 0.97632 | 2.31258 | 4.44069 | 3.18175 | 3.89799 | 4.02012 | 2.97493 | 3.63580 | 4.61368 | 2.86669 | 3.83184 | 3.13755 | 3.48525 | 2.91560 | 3.28628 | 3.66374 | 5.61691 | 4.32095 | 512 | d | - | - |
|     | 2.68618 | 4.42225 | 2.77519 | 2.73123 | 3.46354 | 2.40513 | 3.72494 | 3.29354 | 2.67741 | 2.69355 | 4.24690 | 2.90347 | 2.73739 | 3.18146 | 2.89801 | 2.37887 | 2.77519 | 2.98518 | 4.58477 | 3.61503 |     |   |   |   |
| 512 | 0.03268 | 3.83303 | 4.55537 | 0.61958 | 0.77255 | 0.48576 | 0.95510 |         |         |         |         |         |         |         |         |         |         |         |         |         |     |   |   |   |
|     | 3.07605 | 4.45331 | 4.49535 | 3.99042 | 3.21279 | 4.28500 | 4.66995 | 1.36797 | 3.80844 | 1.50665 | 3.08467 | 4.26780 | 4.58111 | 4.09498 | 4.00979 | 3.65951 | 3.32907 | 1.83421 | 5.18409 | 3.96301 | 513 | i | - | - |
|     | 2.68618 | 4.42225 | 2.77519 | 2.73123 | 3.46354 | 2.40513 | 3.72494 | 3.29354 | 2.67741 | 2.69355 | 4.24690 | 2.90347 | 2.73739 | 3.18146 | 2.89801 | 2.37887 | 2.77519 | 2.98518 | 4.58477 | 3.61503 |     |   |   |   |
| 513 | 0.03268 | 3.83303 | 4.55537 | 0.61958 | 0.77255 | 0.48576 | 0.95510 |         |         |         |         |         |         |         |         |         |         |         |         |         |     |   |   |   |
|     | 2.88537 | 5.00048 | 2.89893 | 2.42454 | 4.37643 | 3.42871 | 3.63363 | 3.74285 | 1.31285 | 3.29948 | 4.19673 | 3.00932 | 3.90110 | 2.79601 | 2.35417 | 2.89015 | 3.11333 | 3.43132 | 5.41727 | 4.17649 | 514 | k | - | - |
|     | 2.68618 | 4.42225 | 2.77519 | 2.73123 | 3.46354 | 2.40513 | 3.72494 | 3.29354 | 2.67741 | 2.69355 | 4.24690 | 2.90347 | 2.73739 | 3.18146 | 2.89801 | 2.37887 | 2.77519 | 2.98518 | 4.58477 | 3.61503 |     |   |   |   |
| 514 | 0.03268 | 3.83303 | 4.55537 | 0.61958 | 0.77255 | 0.48576 | 0.95510 |         |         |         |         |         |         |         |         |         |         |         |         |         |     |   |   |   |
|     | 2.96214 | 4.80276 | 3.44889 | 2.96907 | 4.14736 | 3.45685 | 3.79770 | 3.68689 | 2.22438 | 3.21005 | 4.21188 | 3.33151 | 3.96192 | 3.02053 | 1.04043 | 3.04858 | 3.23116 | 3.41270 | 5.24678 | 4.08393 | 515 | r | - | - |
|     | 2.68618 | 4.42225 | 2.77519 | 2.73123 | 3.46354 | 2.40513 | 3.72494 | 3.29354 | 2.67741 | 2.69355 | 4.24690 | 2.90347 | 2.73739 | 3.18146 | 2.89801 | 2.37887 | 2.77519 | 2.98518 | 4.58477 | 3.61503 |     |   |   |   |
| 515 | 0.03268 | 3.83303 | 4.55537 | 0.61958 | 0.77255 | 0.48576 | 0.95510 |         |         |         |         |         |         |         |         |         |         |         |         |         |     |   |   |   |
|     | 2.01385 | 4.29370 | 3.84822 | 3.33939 | 3.42545 | 3.71024 | 4.20338 | 1.88111 | 3.22334 | 1.98661 | 3.32684 | 3.65979 | 4.15055 | 3.55660 | 3.51320 | 3.04834 | 2.98269 | 2.00713 | 5.11529 | 3.88573 | 516 | i | - | - |
|     | 2.68618 | 4.42225 | 2.77519 | 2.73123 | 3.46354 | 2.40513 | 3.72494 | 3.29354 | 2.67741 | 2.69355 | 4.24690 | 2.90347 | 2.73739 | 3.18146 | 2.89801 | 2.37887 | 2.77519 | 2.98518 | 4.58477 | 3.61503 |     |   |   |   |
| 516 | 0.03268 | 3.83303 | 4.55537 | 0.61958 | 0.77255 | 0.48576 | 0.95510 |         |         |         |         |         |         |         |         |         |         |         |         |         |     |   |   |   |
|     | 2.62317 | 4.81085 | 2.57494 | 2.33855 | 4.27804 | 2.34592 | 3.68721 | 3.72534 | 2.24644 | 3.30801 | 4.14695 | 2.17709 | 3.76361 | 2.86066 | 2.88132 | 2.64408 | 2.92619 | 3.34347 | 5.49389 | 4.15101 | 517 | n | - | - |
|     | 2.68618 | 4.42225 | 2.77519 | 2.73123 | 3.46354 | 2.40513 | 3.72494 | 3.29354 | 2.67741 | 2.69355 | 4.24690 | 2.90347 | 2.73739 | 3.18146 | 2.89801 | 2.37887 | 2.77519 | 2.98518 | 4.58477 | 3.61503 |     |   |   |   |
| 517 | 0.03268 | 3.83303 | 4.55537 | 0.61958 | 0.77255 | 0.48576 | 0.95510 |         |         |         |         |         |         |         |         |         |         |         |         |         |     |   |   |   |
|     | 2.58649 | 1.86576 | 4.05392 | 3.58898 | 2.63270 | 3.49369 | 4.12321 | 2.43090 | 3.45347 | 2.23792 | 3.37822 | 3.71663 | 4.03905 | 3.71685 | 3.65253 | 2.91263 | 2.93215 | 2.27028 | 4.75115 | 3.36959 | 518 | c | - | - |
|     | 2.68618 | 4.42225 | 2.77519 | 2.73123 | 3.46354 | 2.40513 | 3.72494 | 3.29354 | 2.67741 | 2.69355 | 4.24690 | 2.90347 | 2.73739 | 3.18146 | 2.89801 | 2.37887 | 2.77519 | 2.98518 | 4.58477 | 3.61503 |     |   |   |   |
| 518 | 0.03268 | 3.83303 | 4.55537 | 0.61958 | 0.77255 | 0.48576 | 0.95510 |         |         |         |         |         |         |         |         |         |         |         |         |         |     |   |   |   |
|     | 2.59084 | 4.23004 | 3.91003 | 3.51121 | 3.61948 | 3.51913 | 4.38316 | 2.12280 | 3.38997 | 2.34517 | 3.51940 | 3.71710 | 4.09862 | 3.74298 | 3.64338 | 2.94156 | 2.56552 | 1.30673 | 5.32127 | 4.08472 | 519 | v | - | - |
|     | 2.68618 | 4.42225 | 2.77519 | 2.73123 | 3.46354 | 2.40513 | 3.72494 | 3.29354 | 2.67741 | 2.69355 | 4.24690 | 2.90347 | 2.73739 | 3.18146 | 2.89801 | 2.37887 | 2.77519 | 2.98518 | 4.58477 | 3.61503 |     |   |   |   |
| 519 | 0.03268 | 3.83303 | 4.55537 | 0.61958 | 0.77255 | 0.48576 | 0.95510 |         |         |         |         |         |         |         |         |         |         |         |         |         |     |   |   |   |
|     | 3.07422 | 4.49292 | 4.34097 | 3.87343 | 1.58581 | 4.10685 | 4.07178 | 2.07226 | 3.74317 | 1.76636 | 3.11885 | 4.03752 | 4.44102 | 3.92382 | 3.91316 | 3.47085 | 3.32744 | 2.29841 | 4.40239 | 2.86585 | 520 | f | - | - |
|     | 2.68618 | 4.42225 | 2.77519 | 2.73123 | 3.46354 | 2.40513 | 3.72494 | 3.29354 | 2.67741 | 2.69355 | 4.24690 | 2.90347 | 2.73739 | 3.18146 | 2.89801 | 2.37887 | 2.77519 | 2.98518 | 4.58477 | 3.61503 |     |   |   |   |
| 520 | 0.03268 | 3.83303 | 4.55537 | 0.61958 | 0.77255 | 0.48576 | 0.95510 |         |         |         |         |         |         |         |         |         |         |         |         |         |     |   |   |   |
|     | 2.41486 | 4.66827 | 2.84739 | 2.44503 | 4.03017 | 3.29051 | 3.42466 | 3.44380 | 2.23508 | 3.05766 | 3.89660 | 2.93134 | 2.56896 | 2.82721 | 2.80654 | 2.44956 | 2.83496 | 3.11159 | 5.29410 | 3.98596 | 521 | k | - | - |
|     | 2.68618 | 4.42225 | 2.77519 | 2.73123 | 3.46354 | 2.40513 | 3.72494 | 3.29354 | 2.67741 | 2.69355 | 4.24690 | 2.90347 | 2.73739 | 3.18146 | 2.89801 | 2.37887 | 2.77519 | 2.98518 | 4.58477 | 3.61503 |     |   |   |   |
| 521 | 0.03268 | 3.83303 | 4.55537 | 0.61958 | 0.77255 | 0.48576 | 0.95510 |         |         |         |         |         |         |         |         |         |         |         |         |         |     |   |   |   |
|     | 2.81280 | 5.21935 | 1.40982 | 2.09543 | 4.53727 | 3.14050 | 3.72205 | 4.09316 | 2.73672 | 3.64859 | 4.51700 | 2.24873 | 3.76971 | 2.90583 | 3.29723 | 2.73892 | 3.12337 | 3.68200 | 5.77385 | 4.29983 | 522 | d | - | - |
|     | 2.68618 | 4.42225 | 2.77519 | 2.73123 | 3.46354 | 2.40513 | 3.72494 | 3.29354 | 2.67741 | 2.69355 | 4.24690 | 2.90347 | 2.73739 | 3.18146 | 2.89801 | 2.37887 | 2.77519 | 2.98518 | 4.58477 | 3.61503 |     |   |   |   |
| 522 | 0.03268 | 3.83303 | 4.55537 | 0.61958 | 0.77255 | 0.48576 | 0.95510 |         |         |         |         |         |         |         |         |         |         |         |         |         |     |   |   |   |
|     | 2.70125 | 4.46443 | 3.30428 | 3.13815 | 4.13555 | 3.15421 | 4.21835 | 3.67141 | 3.19219 | 3.30231 | 4.35093 | 3.44851 | 0.90433 | 3.58220 | 3.44165 | 2.86766 | 3.13986 | 3.32122 | 5.33234 | 4.25589 | 523 | p | - | - |
|     | 2.68618 | 4.42225 | 2.77519 | 2.73123 | 3.46354 | 2.40513 | 3.72494 | 3.29354 | 2.67741 | 2.69355 | 4.24690 | 2.90347 | 2.73739 | 3.18146 | 2.89801 | 2.37887 | 2.77519 | 2.98518 | 4.58477 | 3.61503 |     |   |   |   |
| 523 | 0.03268 | 3.83303 | 4.55537 | 0.61958 | 0.77255 | 0.48576 | 0.95510 |         |         |         |         |         |         |         |         |         |         |         |         |         |     |   |   |   |
|     | 3.05234 | 4.47968 | 4.39107 | 3.84101 | 3.10920 | 4.21299 | 4.54385 | 2.06576 | 3.68366 | 1.19161 | 2.58465 | 4.14940 | 4.48981 | 3.92953 | 3.89590 | 3.54628 | 3.29196 | 1.91115 | 5.08653 | 3.94249 | 524 | l | - | - |
|     | 2.68618 | 4.42225 | 2.77519 | 2.73123 | 3.46354 | 2.40513 | 3.72494 | 3.29354 | 2.67741 | 2.69355 | 4.24690 | 2.90347 | 2.73739 | 3.18146 | 2.89801 | 2.37887 | 2.77519 | 2.98518 | 4.58477 | 3.61503 |     |   |   |   |
| 524 | 0.03268 | 3.83303 | 4.55537 | 0.61958 | 0.77255 | 0.48576 | 0.95510 |         |         |         |         |         |         |         |         |         |         |         |         |         |     |   |   |   |
|     | 1.89847 | 4.59503 | 2.98084 | 2.60798 | 4.09184 | 3.26601 | 3.73687 | 3.37781 | 1.86956 | 3.07820 | 3.97288 | 3.03842 | 3.80432 | 2.92903 | 2.71506 | 2.66607 | 2.88817 | 3.05660 | 5.34748 | 4.07730 | 525 | k | - | - |
|     | 2.68618 | 4.42225 | 2.77519 | 2.73123 | 3.46354 | 2.40513 | 3.72494 | 3.29354 | 2.67741 | 2.69355 | 4.24690 | 2.90347 | 2.73739 | 3.18146 | 2.89801 | 2.37887 | 2.77519 | 2.98518 | 4.58477 | 3.61503 |     |   |   |   |
| 525 | 0.03268 | 3.83303 | 4.55537 | 0.61958 | 0.77255 | 0.48576 | 0.95510 |         |         |         |         |         |         |         |         |         |         |         |         |         |     |   |   |   |
|     | 2.15820 | 4.49560 | 3.09133 | 2.60246 | 3.81794 | 3.05883 | 3.69698 | 2.80816 | 2.13706 | 2.83876 | 3.71319 | 3.05118 | 3.80401 | 2.90758 | 2.85409 | 2.64262 | 2.79970 | 2.83581 | 5.15552 | 3.88220 | 526 | k | - | - |
|     | 2.68618 | 4.42225 | 2.77519 | 2.73123 | 3.46354 | 2.40513 | 3.72494 | 3.29354 | 2.67741 | 2.69355 | 4.24690 | 2.90347 | 2.73739 | 3.18146 | 2.89801 | 2.37887 | 2.77519 | 2.98518 | 4.58477 | 3.61503 |     |   |   |   |
| 526 | 0.03268 | 3.83303 | 4.55537 | 0.61958 | 0.77255 | 0.48576 | 0.95510 |         |         |         |         |         |         |         |         |         |         |         |         |         |     |   |   |   |
|     | 3.15472 | 4.55840 | 4.36920 | 3.90908 | 1.63239 | 4.16341 | 4.03194 | 2.37729 | 3.76570 | 1.47455 | 3.09170 | 4.06434 | 4.47652 | 3.93613 | 3.92547 | 3.53355 | 3.39939 | 2.41984 | 4.32719 | 2.77107 | 527 | l | - | - |
|     | 2.68618 | 4.42225 | 2.77519 | 2.73123 | 3.46354 | 2.40513 | 3.72494 | 3.29354 | 2.67741 | 2.69355 | 4.24690 | 2.90347 | 2.73739 | 3.18146 | 2.89801 | 2.37887 | 2.77519 | 2.98518 | 4.58477 | 3.61503 |     |   |   |   |
|     | 0.02212 | 3.82246 | *       | 0.61958 | 0.77255 | 0.00000 | *       |         |         |         |         |         |         |         |         |         |         |         |         |         |     |   |   |   |

//  
HMMER3/f [3.1b2 | February 2015]  
NAME PmoA  
ACC PF14100.5  
DESC Methane oxygenase PmoA  
LENG 271  
ALPH amino  
RF no  
MM no  
CONS yes  
CS no  
MAP yes  
DATE Thu Jan 19 06:32:35 2017  
NSEQ 101  
EFFN 4.663483  
CKSUM 3333536686  
GA 27.00 27.00;

TC 27.70 42.50;  
NC 18.60 22.50;  
BM hmmbuild HMM.ann SEED.ann  
SM hmmsearch -Z 26740544 -E 1000 --cpu 4 HMM pfamseq  
STATS LOCAL MSV -11.0667 0.70215  
STATS LOCAL VITERBI -11.8736 0.70215  
STATS LOCAL FORWARD -5.1113 0.70215  
HMM

|       |         | A       | C       | D       | E       | F       | G       | H       | I       | K       | L       | M       | N       | P       | Q       | R       | S       | T       | V       | W       | Y          |
|-------|---------|---------|---------|---------|---------|---------|---------|---------|---------|---------|---------|---------|---------|---------|---------|---------|---------|---------|---------|---------|------------|
|       |         | m->m    | m->i    | m->d    | i->m    | i->i    | d->m    | d->d    |         |         |         |         |         |         |         |         |         |         |         |         |            |
| COMPO | 2.52515 | 4.76848 | 2.92134 | 2.63783 | 3.37938 | 2.73487 | 3.36412 | 3.09915 | 2.72502 | 2.57730 | 3.87693 | 3.08304 | 3.14670 | 3.10187 | 2.81265 | 2.68435 | 2.70685 | 2.71821 | 3.89961 | 3.50278 |            |
|       | 2.68618 | 4.42225 | 2.77519 | 2.73123 | 3.46354 | 2.40513 | 3.72494 | 3.29354 | 2.67741 | 2.69355 | 4.24690 | 2.90347 | 2.73739 | 3.18146 | 2.89801 | 2.37887 | 2.77519 | 2.98518 | 4.58477 | 3.61503 |            |
|       | 0.27282 | 5.28723 | 1.45366 | 0.61958 | 0.77255 | 0.00000 | *       |         |         |         |         |         |         |         |         |         |         |         |         |         |            |
| 1     | 2.07421 | 4.30993 | 3.02561 | 2.29320 | 4.70871 | 3.36655 | 3.71951 | 4.18784 | 2.05176 | 3.54979 | 4.41656 | 3.13473 | 4.05670 | 2.62078 | 2.33612 | 2.30323 | 2.53370 | 3.75876 | 5.81183 | 3.75914 | 1 k - - -  |
|       | 2.68618 | 4.42225 | 2.77519 | 2.73123 | 3.46354 | 2.40513 | 3.72494 | 3.29354 | 2.67741 | 2.69355 | 4.24690 | 2.90347 | 2.73739 | 3.18146 | 2.89801 | 2.37887 | 2.77519 | 2.98518 | 4.58477 | 3.61503 |            |
|       | 0.00982 | 5.02423 | 5.74657 | 0.61958 | 0.77255 | 0.51518 | 0.90979 |         |         |         |         |         |         |         |         |         |         |         |         |         |            |
| 2     | 2.59420 | 4.40308 | 4.81486 | 4.20970 | 3.49819 | 4.15575 | 4.48151 | 1.88165 | 4.02705 | 1.82883 | 3.52113 | 4.26669 | 3.80409 | 3.50361 | 4.08917 | 3.14136 | 2.58966 | 1.43687 | 4.42164 | 3.84358 | 2 v - - -  |
|       | 2.68618 | 4.42225 | 2.77519 | 2.73123 | 3.46354 | 2.40513 | 3.72494 | 3.29354 | 2.67741 | 2.69355 | 4.24690 | 2.90347 | 2.73739 | 3.18146 | 2.89801 | 2.37887 | 2.77519 | 2.98518 | 4.58477 | 3.61503 |            |
|       | 0.00836 | 5.18425 | 5.90660 | 0.61958 | 0.77255 | 0.51661 | 0.90768 |         |         |         |         |         |         |         |         |         |         |         |         |         |            |
| 3     | 2.39114 | 4.86811 | 2.12932 | 2.03811 | 4.82119 | 3.75879 | 3.94639 | 3.96401 | 2.41476 | 3.28951 | 4.52336 | 2.94119 | 3.67936 | 2.84028 | 2.79685 | 2.27342 | 2.59281 | 2.89175 | 5.91714 | 4.50935 | 3 e - - -  |
|       | 2.68618 | 4.42225 | 2.77519 | 2.73123 | 3.46354 | 2.40513 | 3.72494 | 3.29354 | 2.67741 | 2.69355 | 4.24690 | 2.90347 | 2.73739 | 3.18146 | 2.89801 | 2.37887 | 2.77519 | 2.98518 | 4.58477 | 3.61503 |            |
|       | 0.00789 | 5.24176 | 5.96410 | 0.61958 | 0.77255 | 0.58196 | 0.81826 |         |         |         |         |         |         |         |         |         |         |         |         |         |            |
| 4     | 2.92376 | 4.42627 | 5.00576 | 4.14645 | 2.87629 | 4.22106 | 4.16748 | 1.75317 | 4.17897 | 1.50282 | 3.16554 | 4.38035 | 4.58384 | 4.31163 | 4.19063 | 3.41663 | 3.28329 | 1.53547 | 5.04973 | 3.55217 | 4 l - - -  |
|       | 2.68618 | 4.42225 | 2.77519 | 2.73123 | 3.46354 | 2.40513 | 3.72494 | 3.29354 | 2.67741 | 2.69355 | 4.24690 | 2.90347 | 2.73739 | 3.18146 | 2.89801 | 2.37887 | 2.77519 | 2.98518 | 4.58477 | 3.61503 |            |
|       | 0.00781 | 5.25199 | 5.97433 | 0.61958 | 0.77255 | 0.41623 | 1.07743 |         |         |         |         |         |         |         |         |         |         |         |         |         |            |
| 5     | 2.45432 | 5.46088 | 2.88326 | 2.38023 | 4.78314 | 3.41368 | 3.58825 | 4.08600 | 2.42822 | 2.35987 | 3.61149 | 3.07911 | 4.18176 | 2.66804 | 2.57664 | 2.48713 | 2.28219 | 2.99809 | 5.90745 | 3.84116 | 5 t - - -  |
|       | 2.68618 | 4.42225 | 2.77519 | 2.73123 | 3.46354 | 2.40513 | 3.72494 | 3.29354 | 2.67741 | 2.69355 | 4.24690 | 2.90347 | 2.73739 | 3.18146 | 2.89801 | 2.37887 | 2.77519 | 2.98518 | 4.58477 | 3.61503 |            |
|       | 0.00754 | 5.28723 | 6.00957 | 0.61958 | 0.77255 | 0.48576 | 0.95510 |         |         |         |         |         |         |         |         |         |         |         |         |         |            |
| 6     | 2.44027 | 3.78377 | 3.64863 | 3.72703 | 3.21681 | 4.11388 | 2.79101 | 1.97850 | 3.37710 | 2.39271 | 3.56713 | 3.75850 | 4.48646 | 3.36256 | 3.00321 | 2.80676 | 3.11568 | 1.80881 | 5.19308 | 3.29139 | 6 v - - -  |
|       | 2.68618 | 4.42225 | 2.77519 | 2.73123 | 3.46354 | 2.40513 | 3.72494 | 3.29354 | 2.67741 | 2.69355 | 4.24690 | 2.90347 | 2.73739 | 3.18146 | 2.89801 | 2.37887 | 2.77519 | 2.98518 | 4.58477 | 3.61503 |            |
|       | 0.00754 | 5.28723 | 6.00957 | 0.61958 | 0.77255 | 0.48576 | 0.95510 |         |         |         |         |         |         |         |         |         |         |         |         |         |            |
| 7     | 2.73677 | 5.03111 | 1.63170 | 2.23565 | 4.87645 | 1.85781 | 3.56889 | 4.36261 | 2.59263 | 3.83762 | 4.57489 | 2.72977 | 4.18449 | 2.89487 | 3.05200 | 2.85621 | 3.18134 | 3.92294 | 5.96609 | 4.55384 | 7 d - - -  |
|       | 2.68618 | 4.42225 | 2.77519 | 2.73123 | 3.46354 | 2.40513 | 3.72494 | 3.29354 | 2.67741 | 2.69355 | 4.24690 | 2.90347 | 2.73739 | 3.18146 | 2.89801 | 2.37887 | 2.77519 | 2.98518 | 4.58477 | 3.61503 |            |
|       | 0.00754 | 5.28723 | 6.00957 | 0.61958 | 0.77255 | 0.48576 | 0.95510 |         |         |         |         |         |         |         |         |         |         |         |         |         |            |
| 8     | 3.30444 | 5.85169 | 2.13800 | 2.61188 | 5.17610 | 0.99919 | 3.79187 | 4.67536 | 3.03719 | 4.14880 | 4.91402 | 2.66185 | 4.37546 | 3.20359 | 3.13796 | 2.61736 | 3.55190 | 4.23432 | 6.28481 | 4.83945 | 8 g - - -  |
|       | 2.68607 | 4.42226 | 2.77520 | 2.73124 | 3.46355 | 2.40513 | 3.72495 | 3.29355 | 2.67741 | 2.69356 | 4.24690 | 2.90347 | 2.73740 | 3.18147 | 2.89801 | 2.37887 | 2.77520 | 2.98519 | 4.58478 | 3.61504 |            |
|       | 0.03478 | 3.93610 | 4.22291 | 0.44930 | 1.01632 | 0.48576 | 0.95510 |         |         |         |         |         |         |         |         |         |         |         |         |         |            |
| 9     | 2.86975 | 4.87640 | 3.18382 | 2.37695 | 4.79585 | 3.68094 | 3.59698 | 4.01164 | 1.78593 | 3.12878 | 4.51345 | 3.10277 | 4.17339 | 2.37547 | 2.34309 | 2.57674 | 2.42675 | 2.71752 | 4.67110 | 4.51123 | 10 k - - - |
|       | 2.68618 | 4.42225 | 2.77519 | 2.73123 | 3.46354 | 2.40513 | 3.72494 | 3.29354 | 2.67741 | 2.69355 | 4.24690 | 2.90347 | 2.73739 | 3.18146 | 2.89801 | 2.37887 | 2.77519 | 2.98518 | 4.58477 | 3.61503 |            |
|       | 0.00763 | 5.27495 | 5.99730 | 0.61958 | 0.77255 | 0.53059 | 0.88735 |         |         |         |         |         |         |         |         |         |         |         |         |         |            |
| 10    | 2.74577 | 5.33856 | 3.03900 | 2.13368 | 3.81447 | 3.80772 | 3.38664 | 3.66844 | 2.66224 | 2.49616 | 4.39727 | 3.03204 | 1.85869 | 3.06678 | 2.96616 | 2.89129 | 2.70984 | 2.91548 | 5.81303 | 4.18379 | 11 p - - - |
|       | 2.68618 | 4.42225 | 2.77519 | 2.73123 | 3.46354 | 2.40513 | 3.72494 | 3.29354 | 2.67741 | 2.69355 | 4.24690 | 2.90347 | 2.73739 | 3.18146 | 2.89801 | 2.37887 | 2.77519 | 2.98518 | 4.58477 | 3.61503 |            |
|       | 0.00763 | 5.27495 | 5.99730 | 0.61958 | 0.77255 | 0.53059 | 0.88735 |         |         |         |         |         |         |         |         |         |         |         |         |         |            |
| 11    | 3.18746 | 4.65023 | 5.23002 | 4.62442 | 1.83097 | 4.49099 | 4.82746 | 2.42712 | 4.42492 | 1.36690 | 3.60078 | 4.64202 | 4.82557 | 4.54473 | 3.28996 | 3.80901 | 3.52426 | 1.45397 | 5.28457 | 4.12461 | 12 l - - - |
|       | 2.68618 | 4.42225 | 2.77519 | 2.73123 | 3.46354 | 2.40513 | 3.72494 | 3.29354 | 2.67741 | 2.69355 | 4.24690 | 2.90347 | 2.73739 | 3.18146 | 2.89801 | 2.37887 | 2.77519 | 2.98518 | 4.58477 | 3.61503 |            |
|       | 0.00763 | 5.27495 | 5.99730 | 0.61958 | 0.77255 | 0.53059 | 0.88735 |         |         |         |         |         |         |         |         |         |         |         |         |         |            |
| 12    | 1.84825 | 4.22756 | 4.91071 | 4.30259 | 2.56587 | 3.49844 | 4.53887 | 2.07829 | 4.11054 | 1.73303 | 3.21676 | 4.33766 | 4.57549 | 4.26167 | 4.15631 | 3.51730 | 1.71984 | 2.45676 | 3.45384 | 3.88676 | 13 t - - - |
|       | 2.68618 | 4.42225 | 2.77519 | 2.73123 | 3.46354 | 2.40513 | 3.72494 | 3.29354 | 2.67741 | 2.69355 | 4.24690 | 2.90347 | 2.73739 | 3.18146 | 2.89801 | 2.37887 | 2.77519 | 2.98518 | 4.58477 | 3.61503 |            |
|       | 0.00763 | 5.27495 | 5.99730 | 0.61958 | 0.77255 | 0.53059 | 0.88735 |         |         |         |         |         |         |         |         |         |         |         |         |         |            |
| 13    | 2.62282 | 5.48120 | 3.16895 | 2.45635 | 3.71942 | 3.49324 | 3.86357 | 4.29168 | 2.30136 | 3.78128 | 4.52507 | 3.25031 | 4.17126 | 2.58035 | 1.92801 | 2.09755 | 2.08737 | 3.30713 | 5.92112 | 4.51767 | 14 r - - - |
|       | 2.68618 | 4.42225 | 2.77519 | 2.73123 | 3.46354 | 2.40513 | 3.72494 | 3.29354 | 2.67741 | 2.69355 | 4.24690 | 2.90347 | 2.73739 | 3.18146 | 2.89801 | 2.37887 | 2.77519 | 2.98518 | 4.58477 | 3.61503 |            |
|       | 0.00763 | 5.27495 | 5.99730 | 0.61958 | 0.77255 | 0.53059 | 0.88735 |         |         |         |         |         |         |         |         |         |         |         |         |         |            |
| 14    | 4.32040 | 5.53889 | 5.72876 | 5.38746 | 2.01947 | 5.21122 | 3.70693 | 4.06785 | 5.18162 | 2.24702 | 4.68602 | 5.00637 | 4.42016 | 5.07865 | 5.11108 | 4.56165 | 4.53848 | 3.57859 | 3.80759 | 0.55808 | 15 Y - - - |
|       | 2.68618 | 4.42225 | 2.77519 | 2.73123 | 3.46354 | 2.40513 | 3.72494 | 3.29354 | 2.67741 | 2.69355 | 4.24690 | 2.90347 | 2.73739 | 3.18146 | 2.89801 | 2.37887 | 2.77519 | 2.98518 | 4.58477 | 3.61503 |            |
|       | 0.00763 | 5.27495 | 5.99730 | 0.61958 | 0.77255 | 0.53059 | 0.88735 |         |         |         |         |         |         |         |         |         |         |         |         |         |            |
| 15    | 2.92904 | 3.72807 | 3.66401 | 3.11364 | 3.42102 | 3.88435 | 2.65158 | 2.69171 | 3.26493 | 2.57020 | 3.07970 | 2.50145 | 4.37991 | 2.34290 | 3.12120 | 3.19111 | 2.90476 | 1.98155 | 5.35000 | 3.60935 | 16 v - - - |
|       | 2.68618 | 4.42225 | 2.77519 | 2.73123 | 3.46354 | 2.40513 | 3.72494 | 3.29354 | 2.67741 | 2.69355 | 4.24690 | 2.90347 | 2.73739 | 3.18146 | 2.89801 | 2.37887 | 2.77519 | 2.98518 | 4.58477 | 3.61503 |            |
|       | 0.01969 | 5.27495 | 4.24169 | 0.61958 | 0.77255 | 0.53059 | 0.88735 |         |         |         |         |         |         |         |         |         |         |         |         |         |            |
| 16    | 2.88322 | 4.79298 | 2.87153 | 3.25635 | 2.58817 | 3.98007 | 2.99795 | 3.19991 | 2.99907 | 2.54679 | 3.43624 | 3.38732 | 4.12682 | 3.10113 | 3.59200 | 2.93994 | 2.70732 | 2.90944 | 4.19833 | 1.69182 | 17 y - - - |
|       | 2.68618 | 4.42225 | 2.77519 | 2.73123 | 3.46354 | 2.40513 | 3.72494 | 3.29354 | 2.67741 | 2.69355 | 4.24690 | 2.90347 | 2.73739 | 3.18146 | 2.89801 | 2.37887 | 2.77519 | 2.98518 | 4.58477 | 3.61503 |            |
|       | 0.00772 | 5.26298 | 5.98533 | 0.61958 | 0.77255 | 0.50263 | 0.92871 |         |         |         |         |         |         |         |         |         |         |         |         |         |            |
| 17    | 1.86588 | 5.49866 | 2.74206 | 2.51363 | 4.83856 | 2.10372 | 3.96383 | 4.32080 | 2.54450 | 3.67679 | 4.54101 | 3.24514 | 2.75444 | 2.99486 | 2.29360 | 2.50473 | 3.06260 | 3.74732 | 5.93466 | 4.52690 | 18 a - - - |
|       | 2.68616 | 4.42279 | 2.77521 | 2.73144 | 3.46407 | 2.40566 | 3.72526 | 3.29375 | 2.67794 | 2.69365 | 4.24436 | 2.90392 | 2.73557 | 3.18164 | 2.89854 | 2.37889 | 2.77517 | 2.98448 | 4.58530 | 3.61422 |            |





|    |         |         |         |         |         |           |         |         |         |         |         |         |         |         |         |         |         |         |         |         |     |   |   |   |   |
|----|---------|---------|---------|---------|---------|-----------|---------|---------|---------|---------|---------|---------|---------|---------|---------|---------|---------|---------|---------|---------|-----|---|---|---|---|
| 64 | 2.80235 | 5.51270 | 3.04697 | 2.27195 | 4.85478 | 1.34051   | 3.42992 | 4.33853 | 2.24647 | 3.81651 | 4.55441 | 3.25064 | 3.88426 | 2.89163 | 2.81164 | 2.76363 | 2.87349 | 3.74395 | 5.94691 | 4.53786 | 88  | g | - | - | - |
|    | 2.68618 | 4.42225 | 2.77519 | 2.73123 | 3.46354 | 2.40513   | 3.72494 | 3.29354 | 2.67741 | 2.69355 | 4.24690 | 2.90347 | 2.73739 | 3.18146 | 2.89801 | 2.37887 | 2.77519 | 2.98518 | 4.58477 | 3.61503 |     |   |   |   |   |
|    | 0.00754 | 5.28723 | 6.00957 | 0.61958 | 0.77255 | 0.48576   | 0.95510 |         |         |         |         |         |         |         |         |         |         |         |         |         |     |   |   |   |   |
| 65 | 2.83346 | 4.70720 | 3.73071 | 3.32740 | 2.97739 | 3.57344   | 3.03456 | 2.35492 | 3.00141 | 2.31137 | 3.81317 | 3.51945 | 4.06657 | 2.88864 | 3.42014 | 2.83314 | 2.52277 | 1.97991 | 4.53132 | 2.87577 | 89  | v | - | - | - |
|    | 2.68608 | 4.42228 | 2.77522 | 2.73126 | 3.46356 | 2.40495   | 3.72497 | 3.29356 | 2.67743 | 2.69357 | 4.24692 | 2.90349 | 2.73742 | 3.18149 | 2.89803 | 2.37889 | 2.77522 | 2.98521 | 4.58479 | 3.61506 |     |   |   |   |   |
|    | 0.05733 | 2.93244 | 6.00957 | 0.27517 | 1.42479 | 0.48576   | 0.95510 |         |         |         |         |         |         |         |         |         |         |         |         |         |     |   |   |   |   |
| 66 | 3.43201 | 5.98267 | 1.08001 | 2.82401 | 5.31599 | 3.93267   | 4.32598 | 4.82206 | 2.92397 | 3.84006 | 5.08165 | 1.46659 | 4.46132 | 3.45662 | 3.74271 | 2.41344 | 3.47430 | 4.37842 | 6.44032 | 4.97822 | 91  | d | - | - | - |
|    | 2.68618 | 4.42225 | 2.77519 | 2.73123 | 3.46354 | 2.40513   | 3.72494 | 3.29354 | 2.67741 | 2.69355 | 4.24690 | 2.90347 | 2.73739 | 3.18146 | 2.89801 | 2.37887 | 2.77519 | 2.98518 | 4.58477 | 3.61503 |     |   |   |   |   |
|    | 0.00754 | 5.28723 | 6.00957 | 0.61958 | 0.77255 | 0.48576   | 0.95510 |         |         |         |         |         |         |         |         |         |         |         |         |         |     |   |   |   |   |
| 67 | 3.09039 | 4.03204 | 4.76406 | 4.16994 | 0.99652 | 4.22093   | 3.79717 | 2.95409 | 4.00871 | 2.22707 | 3.63040 | 4.27901 | 3.53469 | 4.19086 | 3.66589 | 3.51987 | 2.96771 | 2.76534 | 5.06827 | 2.69016 | 92  | f | - | - | - |
|    | 2.68618 | 4.42225 | 2.77519 | 2.73123 | 3.46354 | 2.40513   | 3.72494 | 3.29354 | 2.67741 | 2.69355 | 4.24690 | 2.90347 | 2.73739 | 3.18146 | 2.89801 | 2.37887 | 2.77519 | 2.98518 | 4.58477 | 3.61503 |     |   |   |   |   |
|    | 0.00754 | 5.28723 | 6.00957 | 0.61958 | 0.77255 | 0.48576   | 0.95510 |         |         |         |         |         |         |         |         |         |         |         |         |         |     |   |   |   |   |
| 68 | 5.06051 | 6.19073 | 5.96221 | 5.81049 | 2.86540 | 5.49710   | 4.65084 | 4.82433 | 5.35855 | 3.97774 | 5.34989 | 5.35738 | 5.89458 | 5.44708 | 4.50000 | 5.09084 | 5.33196 | 4.79430 | 0.23743 | 3.02811 | 93  | w | - | - | - |
|    | 2.68618 | 4.42225 | 2.77519 | 2.73123 | 3.46354 | 2.40513   | 3.72494 | 3.29354 | 2.67741 | 2.69355 | 4.24690 | 2.90347 | 2.73739 | 3.18146 | 2.89801 | 2.37887 | 2.77519 | 2.98518 | 4.58477 | 3.61503 |     |   |   |   |   |
|    | 0.00754 | 5.28723 | 6.00957 | 0.61958 | 0.77255 | 0.48576   | 0.95510 |         |         |         |         |         |         |         |         |         |         |         |         |         |     |   |   |   |   |
| 69 | 2.64374 | 5.44913 | 3.28338 | 2.31208 | 4.76594 | 1.83452   | 2.86884 | 3.75212 | 2.73047 | 3.34709 | 4.03236 | 1.76683 | 4.18610 | 2.84285 | 3.21780 | 2.77504 | 3.24007 | 3.82455 | 5.89917 | 4.50602 | 94  | n | - | - | - |
|    | 2.68618 | 4.42225 | 2.77519 | 2.73123 | 3.46354 | 2.40513   | 3.72494 | 3.29354 | 2.67741 | 2.69355 | 4.24690 | 2.90347 | 2.73739 | 3.18146 | 2.89801 | 2.37887 | 2.77519 | 2.98518 | 4.58477 | 3.61503 |     |   |   |   |   |
|    | 0.01417 | 5.28723 | 4.70878 | 0.61958 | 0.77255 | 0.48576   | 0.95510 |         |         |         |         |         |         |         |         |         |         |         |         |         |     |   |   |   |   |
| 70 | 2.78090 | 3.91704 | 2.91887 | 2.11054 | 1.87882 | 4.73712   | 1.87882 | 3.49547 | 2.73313 | 2.77924 | 3.95059 | 2.16696 | 4.18458 | 2.80075 | 3.21933 | 2.60528 | 3.23521 | 3.79873 | 5.88124 | 4.49241 | 95  | g | - | - | - |
|    | 2.68618 | 4.42225 | 2.77519 | 2.73123 | 3.46354 | 2.40513   | 3.72494 | 3.29354 | 2.67741 | 2.69355 | 4.24690 | 2.90347 | 2.73739 | 3.18146 | 2.89801 | 2.37887 | 2.77519 | 2.98518 | 4.58477 | 3.61503 |     |   |   |   |   |
|    | 0.00759 | 5.28065 | 6.00299 | 0.61958 | 0.77255 | 0.47083   | 0.97946 |         |         |         |         |         |         |         |         |         |         |         |         |         |     |   |   |   |   |
| 71 | 2.78012 | 5.51703 | 2.66650 | 2.59577 | 4.86275 | 2.75082   | 3.09379 | 4.34918 | 2.45699 | 3.82258 | 4.55753 | 2.57858 | 3.06866 | 2.71709 | 1.98090 | 2.08452 | 2.98588 | 3.90802 | 5.94930 | 4.01529 | 96  | r | - | - | - |
|    | 2.68671 | 4.42383 | 2.77517 | 2.73109 | 3.46330 | 2.40400   | 3.72531 | 3.29363 | 2.67845 | 2.69442 | 4.24847 | 2.90443 | 2.73838 | 3.18192 | 2.89708 | 2.37990 | 2.77336 | 2.98393 | 4.58425 | 3.61141 |     |   |   |   |   |
|    | 1.89568 | 0.63051 | 1.14740 | 1.66073 | 0.21072 | 0.48576   | 0.95510 |         |         |         |         |         |         |         |         |         |         |         |         |         |     |   |   |   |   |
| 72 | 2.69100 | 5.10592 | 3.13394 | 2.53576 | 4.36163 | 2.90621   | 3.86391 | 3.78870 | 2.41403 | 3.37226 | 4.17216 | 3.17875 | 2.27198 | 2.91621 | 3.01760 | 2.58650 | 3.07760 | 2.94272 | 5.59659 | 2.05921 | 111 | y | - | - | - |
|    | 2.68618 | 4.42225 | 2.77519 | 2.73123 | 3.46354 | 2.40513   | 3.72494 | 3.29354 | 2.67741 | 2.69355 | 4.24690 | 2.90347 | 2.73739 | 3.18146 | 2.89801 | 2.37887 | 2.77519 | 2.98518 | 4.58477 | 3.61503 |     |   |   |   |   |
|    | 0.15084 | 4.90888 | 2.02019 | 0.61958 | 0.77255 | 1.26683   | 0.33090 |         |         |         |         |         |         |         |         |         |         |         |         |         |     |   |   |   |   |
| 73 | 2.32871 | 5.18646 | 2.85555 | 2.39431 | 4.48772 | 3.24209   | 3.58328 | 3.31850 | 2.35094 | 3.16153 | 4.23890 | 2.91927 | 3.25323 | 2.74186 | 2.58569 | 2.65851 | 2.31594 | 2.76310 | 5.64628 | 4.26343 | 112 | t | - | - | - |
|    | 2.68618 | 4.42225 | 2.77519 | 2.73123 | 3.46354 | 2.40513   | 3.72494 | 3.29354 | 2.67741 | 2.69355 | 4.24690 | 2.90347 | 2.73739 | 3.18146 | 2.89801 | 2.37887 | 2.77519 | 2.98518 | 4.58477 | 3.61503 |     |   |   |   |   |
|    | 0.01267 | 4.77071 | 5.49306 | 0.61958 | 0.77255 | 1.36914   | 0.29347 |         |         |         |         |         |         |         |         |         |         |         |         |         |     |   |   |   |   |
| 74 | 2.33921 | 5.24019 | 2.74360 | 2.16948 | 4.56030 | 3.42491   | 3.45898 | 4.02904 | 2.28189 | 2.81401 | 4.08074 | 2.83862 | 3.50080 | 2.63423 | 2.86489 | 2.55623 | 2.76589 | 3.61735 | 3.15071 | 3.86923 | 113 | e | - | - | - |
|    | 2.68618 | 4.42225 | 2.77519 | 2.73123 | 3.46354 | 2.40513   | 3.72494 | 3.29354 | 2.67741 | 2.69355 | 4.24690 | 2.90347 | 2.73739 | 3.18146 | 2.89801 | 2.37887 | 2.77519 | 2.98518 | 4.58477 | 3.61503 |     |   |   |   |   |
|    | 0.01253 | 4.78165 | 5.50400 | 0.61958 | 0.77255 | 1.33996   | 0.30362 |         |         |         |         |         |         |         |         |         |         |         |         |         |     |   |   |   |   |
| 75 | 2.72963 | 5.12768 | 3.04885 | 2.53534 | 4.40462 | 3.60718   | 3.28782 | 3.84404 | 2.22508 | 1.87851 | 4.18731 | 2.90474 | 3.15061 | 2.80989 | 2.45199 | 2.75193 | 2.83167 | 3.14026 | 5.60268 | 4.23904 | 114 | l | - | - | - |
|    | 2.68618 | 4.42225 | 2.77519 | 2.73123 | 3.46354 | 2.40513   | 3.72494 | 3.29354 | 2.67741 | 2.69355 | 4.24690 | 2.90347 | 2.73739 | 3.18146 | 2.89801 | 2.37887 | 2.77519 | 2.98518 | 4.58477 | 3.61503 |     |   |   |   |   |
|    | 0.01233 | 4.79790 | 5.52025 | 0.61958 | 0.77255 | 1.20291   | 0.35713 |         |         |         |         |         |         |         |         |         |         |         |         |         |     |   |   |   |   |
| 76 | 2.40478 | 5.32772 | 2.41824 | 2.32337 | 4.67121 | 2.77177   | 3.59436 | 4.15633 | 1.91681 | 3.63227 | 4.36906 | 2.78309 | 2.74621 | 2.87756 | 2.70228 | 2.67564 | 2.84655 | 3.71756 | 5.76114 | 4.35065 | 115 | k | - | - | - |
|    | 2.68618 | 4.42225 | 2.77519 | 2.73123 | 3.46354 | 2.40513   | 3.72494 | 3.29354 | 2.67741 | 2.69355 | 4.24690 | 2.90347 | 2.73739 | 3.18146 | 2.89801 | 2.37887 | 2.77519 | 2.98518 | 4.58477 | 3.61503 |     |   |   |   |   |
|    | 0.01170 | 4.84943 | 5.57177 | 0.61958 | 0.77255 | 0.47207   | 0.97739 |         |         |         |         |         |         |         |         |         |         |         |         |         |     |   |   |   |   |
| 77 | 2.84957 | 5.45238 | 2.19687 | 2.21063 | 4.79774 | 3.42569   | 3.46221 | 4.28405 | 1.90705 | 3.25127 | 4.49305 | 2.08917 | 3.20147 | 2.99729 | 2.94555 | 2.53270 | 2.98252 | 3.84319 | 5.88479 | 4.47345 | 116 | k | - | - | - |
|    | 2.68618 | 4.42225 | 2.77519 | 2.73123 | 3.46354 | 2.40513   | 3.72494 | 3.29354 | 2.67741 | 2.69355 | 4.24690 | 2.90347 | 2.73739 | 3.18146 | 2.89801 | 2.37887 | 2.77519 | 2.98518 | 4.58477 | 3.61503 |     |   |   |   |   |
|    | 0.00868 | 5.14664 | 5.86898 | 0.61958 | 0.77255 | 0.79157   | 0.60355 |         |         |         |         |         |         |         |         |         |         |         |         |         |     |   |   |   |   |
| 78 | 2.68181 | 5.45986 | 2.83771 | 2.20960 | 4.80561 | 2.86871   | 2.18993 | 4.29204 | 2.02501 | 3.48582 | 4.50036 | 2.58947 | 3.82437 | 2.73379 | 2.52163 | 2.65374 | 3.11529 | 3.74286 | 5.89209 | 4.48075 | 117 | k | - | - | - |
|    | 2.68618 | 4.42225 | 2.77519 | 2.73123 | 3.46354 | 2.40513   | 3.72494 | 3.29354 | 2.67741 | 2.69355 | 4.24690 | 2.90347 | 2.73739 | 3.18146 | 2.89801 | 2.37887 | 2.77519 | 2.98518 | 4.58477 | 3.61503 |     |   |   |   |   |
|    | 0.30556 | 5.16522 | 1.35643 | 0.61958 | 0.77255 | 0.60228   | 0.79310 |         |         |         |         |         |         |         |         |         |         |         |         |         |     |   |   |   |   |
| 79 | 2.85192 | 5.20195 | 2.92722 | 2.40041 | 3.67905 | 3.11075   | 3.68103 | 3.62960 | 2.20436 | 3.35212 | 3.34342 | 3.14946 | 3.70068 | 2.33191 | 2.93671 | 2.51195 | 2.76930 | 3.03223 | 5.67302 | 2.56192 | 118 | k | - | - | - |
|    | 2.68618 | 4.42225 | 2.77519 | 2.73123 | 3.46354 | 2.40513   | 3.72494 | 3.29354 | 2.67741 | 2.69355 | 4.24690 | 2.90347 | 2.73739 | 3.18146 | 2.89801 | 2.37887 | 2.77519 | 2.98518 | 4.58477 | 3.61503 |     |   |   |   |   |
|    | 0.01072 | 4.93694 | 5.65929 | 0.61958 | 0.77255 | 0.30474   | 1.33681 |         |         |         |         |         |         |         |         |         |         |         |         |         |     |   |   |   |   |
| 80 | 3.00311 | 5.37262 | 3.60210 | 3.20262 | 5.43842 | 0.38781   | 4.98330 | 4.20774 | 3.97892 | 4.52548 | 5.37149 | 3.52270 | 4.65034 | 4.22210 | 4.37025 | 3.45322 | 3.80588 | 4.32963 | 6.73140 | 5.43605 | 119 | G | - | - | - |
|    | 2.68618 | 4.42225 | 2.77519 | 2.73123 | 3.46354 | 2.40513   | 3.72494 | 3.29354 | 2.67741 | 2.69355 | 4.24690 | 2.90347 | 2.73739 | 3.18146 | 2.89801 | 2.37887 | 2.77519 | 2.98518 | 4.58477 | 3.61503 |     |   |   |   |   |
|    | 0.00790 | 5.24104 | 5.96339 | 0.61958 | 0.77255 | 0.74656   |         |         |         |         |         |         |         |         |         |         |         |         |         |         |     |   |   |   |   |
| 81 | 2.78863 | 5.41296 | 3.26735 | 2.39252 | 4.72507 | 3.77182   | 3.50345 | 3.44153 | 2.51828 | 3.23885 | 4.46243 | 3.16997 | 3.53824 | 2.56495 | 2.04479 | 2.22304 | 1.99239 | 3.46883 | 4.63863 | 4.11504 | 120 | t | - | - | - |
|    | 2.68618 | 4.42225 | 2.77519 | 2.73123 | 3.46354 | 2.40513</ |         |         |         |         |         |         |         |         |         |         |         |         |         |         |     |   |   |   |   |





|     |         |         |         |         |         |         |         |         |         |         |         |         |         |         |         |         |         |         |         |         |     |   |   |   |   |  |
|-----|---------|---------|---------|---------|---------|---------|---------|---------|---------|---------|---------|---------|---------|---------|---------|---------|---------|---------|---------|---------|-----|---|---|---|---|--|
| 131 | 3.08595 | 4.21267 | 5.16668 | 4.55394 | 2.58077 | 4.37673 | 4.71275 | 1.48890 | 4.34194 | 1.23978 | 3.34387 | 4.54229 | 4.72456 | 4.45958 | 4.34499 | 3.69223 | 3.33891 | 2.09256 | 4.08871 | 4.01475 | 220 | l | - | - | - |  |
|     | 2.68618 | 4.42225 | 2.77519 | 2.73123 | 3.46354 | 2.40513 | 3.72494 | 3.29354 | 2.67741 | 2.69355 | 4.24690 | 2.90347 | 2.73739 | 3.18146 | 2.89801 | 2.37887 | 2.77519 | 2.98518 | 4.58477 | 3.61503 |     |   |   |   |   |  |
|     | 0.00754 | 5.28723 | 6.00957 | 0.61958 | 0.77255 | 0.48576 | 0.95510 |         |         |         |         |         |         |         |         |         |         |         |         |         |     |   |   |   |   |  |
| 132 | 2.79972 | 5.48890 | 1.16085 | 2.28757 | 4.81223 | 3.66797 | 3.56715 | 4.28434 | 2.74348 | 3.41206 | 4.53649 | 3.27209 | 4.19613 | 3.01710 | 3.07890 | 2.99803 | 2.40735 | 3.34240 | 5.93434 | 4.53457 | 221 | d | - | - | - |  |
|     | 2.68618 | 4.42225 | 2.77519 | 2.73123 | 3.46354 | 2.40513 | 3.72494 | 3.29354 | 2.67741 | 2.69355 | 4.24690 | 2.90347 | 2.73739 | 3.18146 | 2.89801 | 2.37887 | 2.77519 | 2.98518 | 4.58477 | 3.61503 |     |   |   |   |   |  |
|     | 0.00754 | 5.28723 | 6.00957 | 0.61958 | 0.77255 | 0.48576 | 0.95510 |         |         |         |         |         |         |         |         |         |         |         |         |         |     |   |   |   |   |  |
| 133 | 2.90893 | 3.69187 | 4.99901 | 4.09604 | 1.91967 | 4.22698 | 4.55919 | 2.40434 | 4.17579 | 2.01556 | 3.22420 | 4.38116 | 4.59092 | 4.31173 | 2.56889 | 3.23117 | 3.29256 | 2.22719 | 2.23820 | 3.14941 | 222 | f | - | - | - |  |
|     | 2.68618 | 4.42225 | 2.77519 | 2.73123 | 3.46354 | 2.40513 | 3.72494 | 3.29354 | 2.67741 | 2.69355 | 4.24690 | 2.90347 | 2.73739 | 3.18146 | 2.89801 | 2.37887 | 2.77519 | 2.98518 | 4.58477 | 3.61503 |     |   |   |   |   |  |
|     | 0.00754 | 5.28723 | 6.00957 | 0.61958 | 0.77255 | 0.48576 | 0.95510 |         |         |         |         |         |         |         |         |         |         |         |         |         |     |   |   |   |   |  |
| 134 | 2.58826 | 5.50280 | 2.03814 | 2.20191 | 4.84241 | 3.67057 | 3.42035 | 3.19107 | 2.65899 | 3.80575 | 4.54490 | 3.25038 | 4.17421 | 2.53464 | 2.84805 | 2.16867 | 2.10776 | 3.75195 | 5.93875 | 4.10388 | 223 | d | - | - | - |  |
|     | 2.68618 | 4.42225 | 2.77519 | 2.73123 | 3.46354 | 2.40513 | 3.72494 | 3.29354 | 2.67741 | 2.69355 | 4.24690 | 2.90347 | 2.73739 | 3.18146 | 2.89801 | 2.37887 | 2.77519 | 2.98518 | 4.58477 | 3.61503 |     |   |   |   |   |  |
|     | 0.00754 | 5.28723 | 6.00957 | 0.61958 | 0.77255 | 0.48576 | 0.95510 |         |         |         |         |         |         |         |         |         |         |         |         |         |     |   |   |   |   |  |
| 135 | 2.75354 | 4.45658 | 4.89029 | 4.28388 | 2.78909 | 4.21468 | 4.54110 | 1.84806 | 4.09755 | 2.31183 | 3.39183 | 4.33204 | 4.57964 | 4.25377 | 4.15298 | 1.73184 | 1.83441 | 2.49265 | 4.33020 | 3.74057 | 224 | s | - | - | - |  |
|     | 2.68618 | 4.42225 | 2.77519 | 2.73123 | 3.46354 | 2.40513 | 3.72494 | 3.29354 | 2.67741 | 2.69355 | 4.24690 | 2.90347 | 2.73739 | 3.18146 | 2.89801 | 2.37887 | 2.77519 | 2.98518 | 4.58477 | 3.61503 |     |   |   |   |   |  |
|     | 0.00754 | 5.28723 | 6.00957 | 0.61958 | 0.77255 | 0.48576 | 0.95510 |         |         |         |         |         |         |         |         |         |         |         |         |         |     |   |   |   |   |  |
| 136 | 2.59521 | 5.44554 | 3.00815 | 2.23014 | 4.76163 | 3.79211 | 3.55028 | 4.22764 | 2.63261 | 3.15592 | 4.24663 | 3.17632 | 4.18486 | 2.78194 | 2.73885 | 2.63093 | 1.54150 | 2.55707 | 5.89595 | 4.50322 | 225 | t | - | - | - |  |
|     | 2.68618 | 4.42225 | 2.77519 | 2.73123 | 3.46354 | 2.40513 | 3.72494 | 3.29354 | 2.67741 | 2.69355 | 4.24690 | 2.90347 | 2.73739 | 3.18146 | 2.89801 | 2.37887 | 2.77519 | 2.98518 | 4.58477 | 3.61503 |     |   |   |   |   |  |
|     | 0.00754 | 5.28723 | 6.00957 | 0.61958 | 0.77255 | 0.48576 | 0.95510 |         |         |         |         |         |         |         |         |         |         |         |         |         |     |   |   |   |   |  |
| 137 | 3.32353 | 4.69862 | 5.16359 | 4.55793 | 4.55793 | 3.97017 | 4.81611 | 2.75197 | 4.37353 | 0.70377 | 2.88113 | 4.61856 | 4.82504 | 3.11386 | 4.41497 | 3.80953 | 3.55163 | 2.58693 | 5.28308 | 4.13641 | 226 | l | - | - | - |  |
|     | 2.68618 | 4.42225 | 2.77519 | 2.73123 | 3.46354 | 2.40513 | 3.72494 | 3.29354 | 2.67741 | 2.69355 | 4.24690 | 2.90347 | 2.73739 | 3.18146 | 2.89801 | 2.37887 | 2.77519 | 2.98518 | 4.58477 | 3.61503 |     |   |   |   |   |  |
|     | 0.00754 | 5.28723 | 6.00957 | 0.61958 | 0.77255 | 0.48576 | 0.95510 |         |         |         |         |         |         |         |         |         |         |         |         |         |     |   |   |   |   |  |
| 138 | 2.92971 | 5.00883 | 3.26690 | 2.30150 | 4.81994 | 3.65365 | 3.13890 | 4.29719 | 2.14997 | 3.29070 | 4.16143 | 3.08346 | 4.17771 | 2.56521 | 2.55392 | 2.79016 | 1.50976 | 3.51427 | 5.92691 | 4.52376 | 227 | t | - | - | - |  |
|     | 2.68618 | 4.42225 | 2.77519 | 2.73123 | 3.46354 | 2.40513 | 3.72494 | 3.29354 | 2.67741 | 2.69355 | 4.24690 | 2.90347 | 2.73739 | 3.18146 | 2.89801 | 2.37887 | 2.77519 | 2.98518 | 4.58477 | 3.61503 |     |   |   |   |   |  |
|     | 0.00754 | 5.28723 | 6.00957 | 0.61958 | 0.77255 | 0.48576 | 0.95510 |         |         |         |         |         |         |         |         |         |         |         |         |         |     |   |   |   |   |  |
| 139 | 1.45808 | 3.08070 | 3.67710 | 3.12233 | 4.27727 | 3.89900 | 4.22116 | 3.66545 | 3.10268 | 3.22476 | 3.78720 | 1.99001 | 2.43166 | 3.43486 | 3.52641 | 2.56826 | 2.93972 | 3.26870 | 5.63467 | 4.35313 | 228 | a | - | - | - |  |
|     | 2.68618 | 4.42225 | 2.77519 | 2.73123 | 3.46354 | 2.40513 | 3.72494 | 3.29354 | 2.67741 | 2.69355 | 4.24690 | 2.90347 | 2.73739 | 3.18146 | 2.89801 | 2.37887 | 2.77519 | 2.98518 | 4.58477 | 3.61503 |     |   |   |   |   |  |
|     | 0.00754 | 5.28723 | 6.00957 | 0.61958 | 0.77255 | 0.48576 | 0.95510 |         |         |         |         |         |         |         |         |         |         |         |         |         |     |   |   |   |   |  |
| 140 | 2.15475 | 5.08871 | 3.16727 | 2.68356 | 4.03775 | 3.88307 | 4.09683 | 3.30572 | 2.88884 | 2.01905 | 4.00028 | 3.21551 | 3.20492 | 2.83966 | 2.99151 | 2.87002 | 2.35804 | 2.19380 | 5.61635 | 4.31101 | 229 | l | - | - | - |  |
|     | 2.68618 | 4.42225 | 2.77519 | 2.73123 | 3.46354 | 2.40513 | 3.72494 | 3.29354 | 2.67741 | 2.69355 | 4.24690 | 2.90347 | 2.73739 | 3.18146 | 2.89801 | 2.37887 | 2.77519 | 2.98518 | 4.58477 | 3.61503 |     |   |   |   |   |  |
|     | 0.00754 | 5.28723 | 6.00957 | 0.61958 | 0.77255 | 0.48576 | 0.95510 |         |         |         |         |         |         |         |         |         |         |         |         |         |     |   |   |   |   |  |
| 141 | 2.44167 | 5.50080 | 2.48530 | 2.48231 | 4.83965 | 2.81772 | 3.70720 | 4.10287 | 2.42471 | 3.28846 | 3.99577 | 2.93594 | 3.96011 | 2.93982 | 2.55607 | 2.11810 | 2.36381 | 2.83441 | 5.93723 | 4.53005 | 230 | s | - | - | - |  |
|     | 2.68618 | 4.42225 | 2.77519 | 2.73123 | 3.46354 | 2.40513 | 3.72494 | 3.29354 | 2.67741 | 2.69355 | 4.24690 | 2.90347 | 2.73739 | 3.18146 | 2.89801 | 2.37887 | 2.77519 | 2.98518 | 4.58477 | 3.61503 |     |   |   |   |   |  |
|     | 0.00754 | 5.28723 | 6.00957 | 0.61958 | 0.77255 | 0.48576 | 0.95510 |         |         |         |         |         |         |         |         |         |         |         |         |         |     |   |   |   |   |  |
| 142 | 2.74301 | 5.52134 | 1.78668 | 2.07871 | 4.86685 | 2.34046 | 3.96851 | 4.07973 | 2.14914 | 3.82680 | 4.56205 | 2.95748 | 3.25595 | 2.83901 | 3.07007 | 2.57028 | 3.09530 | 3.91225 | 5.95359 | 4.54183 | 231 | d | - | - | - |  |
|     | 2.68599 | 4.42247 | 2.77501 | 2.73069 | 3.46376 | 2.40515 | 3.72486 | 3.29376 | 2.67763 | 2.69377 | 4.24712 | 2.90362 | 2.73762 | 3.18149 | 2.89757 | 2.37869 | 2.77533 | 2.98530 | 4.58499 | 3.61525 |     |   |   |   |   |  |
|     | 0.73800 | 0.91142 | 2.12048 | 0.07681 | 2.60457 | 0.95510 |         |         |         |         |         |         |         |         |         |         |         |         |         |         |     |   |   |   |   |  |
| 143 | 2.70740 | 4.90023 | 2.25671 | 2.28834 | 4.78521 | 3.03192 | 3.90951 | 3.83878 | 2.43503 | 3.63840 | 4.48714 | 2.85228 | 1.93196 | 2.74011 | 3.13820 | 2.60040 | 2.66334 | 3.58405 | 5.88083 | 4.47288 | 234 | p | - | - | - |  |
|     | 2.68618 | 4.42225 | 2.77519 | 2.73123 | 3.46354 | 2.40513 | 3.72494 | 3.29354 | 2.67741 | 2.69355 | 4.24690 | 2.90347 | 2.73739 | 3.18146 | 2.89801 | 2.37887 | 2.77519 | 2.98518 | 4.58477 | 3.61503 |     |   |   |   |   |  |
|     | 0.00855 | 5.16221 | 5.88456 | 0.61958 | 0.77255 | 0.31047 | 1.32088 |         |         |         |         |         |         |         |         |         |         |         |         |         |     |   |   |   |   |  |
| 144 | 3.28163 | 5.01426 | 5.81401 | 5.27953 | 3.86774 | 5.19262 | 5.69874 | 1.82380 | 5.15119 | 1.43928 | 4.05030 | 5.35405 | 5.46318 | 5.31838 | 5.22309 | 4.56389 | 3.62511 | 0.84352 | 6.08551 | 4.90874 | 235 | v | - | - | - |  |
|     | 2.68618 | 4.42225 | 2.77519 | 2.73123 | 3.46354 | 2.40513 | 3.72494 | 3.29354 | 2.67741 | 2.69355 | 4.24690 | 2.90347 | 2.73739 | 3.18146 | 2.89801 | 2.37887 | 2.77519 | 2.98518 | 4.58477 | 3.61503 |     |   |   |   |   |  |
|     | 0.00754 | 5.28723 | 6.00957 | 0.61958 | 0.77255 | 0.48576 | 0.95510 |         |         |         |         |         |         |         |         |         |         |         |         |         |     |   |   |   |   |  |
| 145 | 2.88971 | 5.34335 | 3.12775 | 2.46225 | 4.02661 | 3.81404 | 3.26980 | 3.74189 | 2.25703 | 3.00712 | 4.22441 | 3.24653 | 3.63738 | 2.96904 | 2.46259 | 2.55790 | 2.05508 | 2.24666 | 4.85642 | 3.92783 | 236 | t | - | - | - |  |
|     | 2.68618 | 4.42225 | 2.77519 | 2.73123 | 3.46354 | 2.40513 | 3.72494 | 3.29354 | 2.67741 | 2.69355 | 4.24690 | 2.90347 | 2.73739 | 3.18146 | 2.89801 | 2.37887 | 2.77519 | 2.98518 | 4.58477 | 3.61503 |     |   |   |   |   |  |
|     | 0.00754 | 5.28723 | 6.00957 | 0.61958 | 0.77255 | 0.48576 | 0.95510 |         |         |         |         |         |         |         |         |         |         |         |         |         |     |   |   |   |   |  |
| 146 | 3.93691 | 5.22368 | 5.90843 | 5.30136 | 1.43500 | 5.19823 | 5.48707 | 1.75540 | 5.11764 | 1.01638 | 3.02507 | 5.36842 | 5.38562 | 5.07758 | 5.06873 | 4.54279 | 4.15006 | 2.74930 | 4.75974 | 4.64404 | 237 | l | - | - | - |  |
|     | 2.68618 | 4.42225 | 2.77519 | 2.73123 | 3.46354 | 2.40513 | 3.72494 | 3.29354 | 2.67741 | 2.69355 | 4.24690 | 2.90347 | 2.73739 | 3.18146 | 2.89801 | 2.37887 | 2.77519 | 2.98518 | 4.58477 | 3.61503 |     |   |   |   |   |  |
|     | 0.00754 | 5.28723 | 6.00957 | 0.61958 | 0.77255 | 0.48576 | 0.95510 |         |         |         |         |         |         |         |         |         |         |         |         |         |     |   |   |   |   |  |
| 147 | 3.01039 | 5.50991 | 2.78278 | 2.34638 | 4.84998 | 1.52103 | 3.69252 | 4.33264 | 2.25669 | 2.80351 | 4.55212 | 2.77599 | 4.02613 | 2.99399 | 3.03662 | 2.88540 | 2.51025 | 3.89791 | 5.94531 | 4.53699 | 238 | g | - | - | - |  |
|     | 2.68618 | 4.42225 | 2.77519 | 2.73123 | 3.46354 | 2.40513 | 3.72494 | 3.29354 | 2.67741 | 2.69355 | 4.24690 | 2.90347 | 2.73739 | 3.18146 | 2.89801 | 2.37887 | 2.77519 | 2.98518 | 4.58477 | 3.61503 |     |   |   |   |   |  |
|     | 0.01417 | 5.28723 | 4.70878 | 0.61958 | 0.77255 | 0.48576 | 0.95510 |         |         |         |         |         |         |         |         |         |         |         |         |         |     |   |   |   |   |  |
| 148 | 2.64833 | 5.52382 | 1.93779 | 2.49434 | 4.86865 | 2.72335 | 3.97081 | 4.35503 | 2.08148 | 3.828   |         |         |         |         |         |         |         |         |         |         |     |   |   |   |   |  |





|     |         |         |         |         |         |         |         |         |         |         |         |         |         |         |         |         |         |         |         |         |     |   |   |   |   |  |
|-----|---------|---------|---------|---------|---------|---------|---------|---------|---------|---------|---------|---------|---------|---------|---------|---------|---------|---------|---------|---------|-----|---|---|---|---|--|
| 198 | 2.63889 | 5.41638 | 2.11447 | 1.98286 | 3.93351 | 2.48513 | 3.60515 | 4.24545 | 2.14633 | 3.72116 | 4.45736 | 2.82310 | 3.55137 | 2.82068 | 2.87916 | 2.87118 | 2.88911 | 3.27452 | 5.84974 | 4.43944 | 341 | e | - | - | - |  |
|     | 2.68618 | 4.42225 | 2.77519 | 2.73123 | 3.46354 | 2.40513 | 3.72494 | 3.29354 | 2.67741 | 2.69355 | 4.24690 | 2.90347 | 2.73739 | 3.18146 | 2.89801 | 2.37887 | 2.77519 | 2.98518 | 4.58477 | 3.61503 |     |   |   |   |   |  |
|     | 0.00931 | 5.07686 | 5.79920 | 0.61958 | 0.77255 | 1.02398 | 0.44498 |         |         |         |         |         |         |         |         |         |         |         |         |         |     |   |   |   |   |  |
| 199 | 2.63177 | 5.41195 | 2.35230 | 2.51241 | 4.75383 | 1.82605 | 3.72148 | 4.06148 | 2.46303 | 3.58091 | 4.45349 | 2.72937 | 3.85748 | 2.61285 | 2.80813 | 2.52728 | 2.64336 | 3.65460 | 5.84652 | 4.43744 | 342 | g | - | - | - |  |
|     | 2.68618 | 4.42225 | 2.77519 | 2.73123 | 3.46354 | 2.40513 | 3.72494 | 3.29354 | 2.67741 | 2.69355 | 4.24690 | 2.90347 | 2.73739 | 3.18146 | 2.89801 | 2.37887 | 2.77519 | 2.98518 | 4.58477 | 3.61503 |     |   |   |   |   |  |
|     | 0.03234 | 5.07686 | 3.66587 | 0.61958 | 0.77255 | 1.02398 | 0.44498 |         |         |         |         |         |         |         |         |         |         |         |         |         |     |   |   |   |   |  |
| 200 | 2.63249 | 5.40588 | 2.73275 | 1.86107 | 4.36303 | 3.10257 | 3.85959 | 4.23480 | 2.06750 | 3.71063 | 4.17875 | 2.79094 | 3.11008 | 2.44027 | 2.70936 | 2.65419 | 2.92972 | 3.52700 | 4.20286 | 4.15032 | 343 | e | - | - | - |  |
|     | 2.68618 | 4.42225 | 2.77519 | 2.73123 | 3.46354 | 2.40513 | 3.72494 | 3.29354 | 2.67741 | 2.69355 | 4.24690 | 2.90347 | 2.73739 | 3.18146 | 2.89801 | 2.37887 | 2.77519 | 2.98518 | 4.58477 | 3.61503 |     |   |   |   |   |  |
|     | 0.22562 | 5.05405 | 1.63170 | 0.61958 | 0.77255 | 0.37095 | 1.17143 |         |         |         |         |         |         |         |         |         |         |         |         |         |     |   |   |   |   |  |
| 201 | 2.35806 | 5.38401 | 1.99933 | 2.56307 | 4.71608 | 2.76645 | 3.87198 | 3.58197 | 2.29928 | 3.58221 | 4.42818 | 2.78920 | 3.14049 | 2.97264 | 2.94454 | 2.46790 | 2.57421 | 3.13988 | 5.82463 | 4.42166 | 344 | d | - | - | - |  |
|     | 2.68480 | 4.42306 | 2.77519 | 2.73125 | 3.46453 | 2.40455 | 3.72466 | 3.29420 | 2.67783 | 2.69415 | 4.24753 | 2.90419 | 2.73610 | 3.18160 | 2.89832 | 2.37937 | 2.77444 | 2.98570 | 4.58262 | 3.61592 |     |   |   |   |   |  |
|     | 0.58725 | 0.97514 | 2.70298 | 1.83051 | 0.17475 | 0.24986 | 1.50918 |         |         |         |         |         |         |         |         |         |         |         |         |         |     |   |   |   |   |  |
| 202 | 2.13494 | 4.26480 | 4.24245 | 2.95160 | 3.51731 | 2.82177 | 3.82429 | 2.43974 | 3.57963 | 2.66789 | 3.46199 | 3.63141 | 3.81606 | 3.83596 | 3.83559 | 2.22600 | 2.99980 | 2.11756 | 3.13316 | 2.79864 | 371 | v | - | - | - |  |
|     | 2.68618 | 4.42225 | 2.77519 | 2.73123 | 3.46354 | 2.40513 | 3.72494 | 3.29354 | 2.67741 | 2.69355 | 4.24690 | 2.90347 | 2.73739 | 3.18146 | 2.89801 | 2.37887 | 2.77519 | 2.98518 | 4.58477 | 3.61503 |     |   |   |   |   |  |
|     | 0.00795 | 5.23451 | 5.95686 | 0.61958 | 0.77255 | 0.38939 | 1.13155 |         |         |         |         |         |         |         |         |         |         |         |         |         |     |   |   |   |   |  |
| 203 | 2.75728 | 4.13644 | 4.02552 | 3.52441 | 4.84625 | 1.32599 | 3.99050 | 4.26827 | 3.51340 | 3.90675 | 4.72084 | 3.42507 | 4.44929 | 3.83386 | 3.91937 | 2.04012 | 1.34161 | 3.82952 | 6.15642 | 4.88761 | 372 | g | - | - | - |  |
|     | 2.68618 | 4.42225 | 2.77519 | 2.73123 | 3.46354 | 2.40513 | 3.72494 | 3.29354 | 2.67741 | 2.69355 | 4.24690 | 2.90347 | 2.73739 | 3.18146 | 2.89801 | 2.37887 | 2.77519 | 2.98518 | 4.58477 | 3.61503 |     |   |   |   |   |  |
|     | 0.00754 | 5.28723 | 6.00957 | 0.61958 | 0.77255 | 0.48576 | 0.95510 |         |         |         |         |         |         |         |         |         |         |         |         |         |     |   |   |   |   |  |
| 204 | 3.35446 | 5.16903 | 6.04963 | 5.54224 | 4.30536 | 5.49136 | 6.07026 | 1.18076 | 5.44804 | 1.23455 | 3.81643 | 5.65795 | 5.69986 | 5.59738 | 5.53110 | 4.89396 | 4.20316 | 1.32938 | 6.34741 | 5.19958 | 373 | i | - | - | - |  |
|     | 2.68618 | 4.42225 | 2.77519 | 2.73123 | 3.46354 | 2.40513 | 3.72494 | 3.29354 | 2.67741 | 2.69355 | 4.24690 | 2.90347 | 2.73739 | 3.18146 | 2.89801 | 2.37887 | 2.77519 | 2.98518 | 4.58477 | 3.61503 |     |   |   |   |   |  |
|     | 0.00754 | 5.28723 | 6.00957 | 0.61958 | 0.77255 | 0.48576 | 0.95510 |         |         |         |         |         |         |         |         |         |         |         |         |         |     |   |   |   |   |  |
| 205 | 1.72505 | 3.50055 | 4.95948 | 4.07694 | 3.59708 | 4.27109 | 4.60716 | 2.67441 | 4.16790 | 1.79534 | 3.42691 | 4.39656 | 4.63397 | 4.32285 | 4.21905 | 3.57992 | 2.25465 | 1.48950 | 5.13438 | 3.95477 | 374 | v | - | - | - |  |
|     | 2.68618 | 4.42225 | 2.77519 | 2.73123 | 3.46354 | 2.40513 | 3.72494 | 3.29354 | 2.67741 | 2.69355 | 4.24690 | 2.90347 | 2.73739 | 3.18146 | 2.89801 | 2.37887 | 2.77519 | 2.98518 | 4.58477 | 3.61503 |     |   |   |   |   |  |
|     | 0.00754 | 5.28723 | 6.00957 | 0.61958 | 0.77255 | 0.48576 | 0.95510 |         |         |         |         |         |         |         |         |         |         |         |         |         |     |   |   |   |   |  |
| 206 | 3.04241 | 4.47952 | 5.07002 | 4.45577 | 1.72274 | 4.28016 | 3.94725 | 1.56392 | 4.24200 | 1.89981 | 2.57659 | 4.44166 | 4.63830 | 4.36788 | 4.24897 | 3.59250 | 3.33956 | 2.28989 | 5.09177 | 3.14226 | 375 | i | - | - | - |  |
|     | 2.68618 | 4.42225 | 2.77519 | 2.73123 | 3.46354 | 2.40513 | 3.72494 | 3.29354 | 2.67741 | 2.69355 | 4.24690 | 2.90347 | 2.73739 | 3.18146 | 2.89801 | 2.37887 | 2.77519 | 2.98518 | 4.58477 | 3.61503 |     |   |   |   |   |  |
|     | 0.00754 | 5.28723 | 6.00957 | 0.61958 | 0.77255 | 0.48576 | 0.95510 |         |         |         |         |         |         |         |         |         |         |         |         |         |     |   |   |   |   |  |
| 207 | 2.24848 | 4.44070 | 5.00446 | 4.06030 | 2.52880 | 4.23008 | 4.56264 | 2.29513 | 4.18063 | 1.44374 | 2.34802 | 4.38525 | 4.59377 | 4.31595 | 4.19665 | 3.07196 | 3.03475 | 2.05738 | 5.06263 | 3.61884 | 376 | l | - | - | - |  |
|     | 2.68618 | 4.42225 | 2.77519 | 2.73123 | 3.46354 | 2.40513 | 3.72494 | 3.29354 | 2.67741 | 2.69355 | 4.24690 | 2.90347 | 2.73739 | 3.18146 | 2.89801 | 2.37887 | 2.77519 | 2.98518 | 4.58477 | 3.61503 |     |   |   |   |   |  |
|     | 0.00754 | 5.28723 | 6.00957 | 0.61958 | 0.77255 | 0.48576 | 0.95510 |         |         |         |         |         |         |         |         |         |         |         |         |         |     |   |   |   |   |  |
| 208 | 2.76220 | 4.85220 | 1.44308 | 2.54962 | 4.85765 | 2.63407 | 3.18432 | 4.34263 | 2.70398 | 3.81881 | 4.55541 | 2.75217 | 3.55815 | 2.45910 | 3.10490 | 2.56419 | 3.13562 | 3.90399 | 5.94782 | 4.16618 | 377 | d | - | - | - |  |
|     | 2.68618 | 4.42225 | 2.77519 | 2.73123 | 3.46354 | 2.40513 | 3.72494 | 3.29354 | 2.67741 | 2.69355 | 4.24690 | 2.90347 | 2.73739 | 3.18146 | 2.89801 | 2.37887 | 2.77519 | 2.98518 | 4.58477 | 3.61503 |     |   |   |   |   |  |
|     | 0.00754 | 5.28723 | 6.00957 | 0.61958 | 0.77255 | 0.48576 | 0.95510 |         |         |         |         |         |         |         |         |         |         |         |         |         |     |   |   |   |   |  |
| 209 | 2.33208 | 5.45768 | 2.62030 | 2.59577 | 4.12258 | 3.39907 | 1.50820 | 4.24771 | 2.72458 | 3.14470 | 4.50481 | 2.78995 | 3.71397 | 3.08436 | 2.98348 | 2.59728 | 3.09371 | 3.83522 | 5.90516 | 3.91004 | 378 | h | - | - | - |  |
|     | 2.68618 | 4.42225 | 2.77519 | 2.73123 | 3.46354 | 2.40513 | 3.72494 | 3.29354 | 2.67741 | 2.69355 | 4.24690 | 2.90347 | 2.73739 | 3.18146 | 2.89801 | 2.37887 | 2.77519 | 2.98518 | 4.58477 | 3.61503 |     |   |   |   |   |  |
|     | 0.00754 | 5.28723 | 6.00957 | 0.61958 | 0.77255 | 0.48576 | 0.95510 |         |         |         |         |         |         |         |         |         |         |         |         |         |     |   |   |   |   |  |
| 210 | 2.90360 | 5.56162 | 3.08146 | 2.61136 | 4.88761 | 2.76127 | 4.07928 | 4.35840 | 2.67294 | 3.86703 | 4.63028 | 3.20589 | 1.07519 | 3.01079 | 3.34907 | 2.77098 | 2.78837 | 3.94679 | 6.02487 | 4.62217 | 379 | p | - | - | - |  |
|     | 2.68618 | 4.42225 | 2.77519 | 2.73123 | 3.46354 | 2.40513 | 3.72494 | 3.29354 | 2.67741 | 2.69355 | 4.24690 | 2.90347 | 2.73739 | 3.18146 | 2.89801 | 2.37887 | 2.77519 | 2.98518 | 4.58477 | 3.61503 |     |   |   |   |   |  |
|     | 0.04503 | 5.28723 | 3.24473 | 0.61958 | 0.77255 | 0.48576 | 0.95510 |         |         |         |         |         |         |         |         |         |         |         |         |         |     |   |   |   |   |  |
| 211 | 2.47761 | 5.49777 | 2.44262 | 2.02568 | 4.84270 | 2.92325 | 3.94813 | 4.32861 | 2.30956 | 3.62649 | 4.53851 | 2.97098 | 3.39189 | 2.68147 | 3.17587 | 1.91273 | 2.60161 | 3.44519 | 5.93053 | 4.51958 | 380 | s | - | - | - |  |
|     | 2.68618 | 4.42225 | 2.77519 | 2.73123 | 3.46354 | 2.40513 | 3.72494 | 3.29354 | 2.67741 | 2.69355 | 4.24690 | 2.90347 | 2.73739 | 3.18146 | 2.89801 | 2.37887 | 2.77519 | 2.98518 | 4.58477 | 3.61503 |     |   |   |   |   |  |
|     | 0.01612 | 5.25002 | 4.53340 | 0.61958 | 0.77255 | 0.43158 | 1.04835 |         |         |         |         |         |         |         |         |         |         |         |         |         |     |   |   |   |   |  |
| 212 | 2.72581 | 5.48366 | 3.08509 | 2.55854 | 4.80774 | 3.12544 | 3.81811 | 4.27985 | 2.60708 | 3.47373 | 4.53240 | 1.05572 | 3.79051 | 3.09619 | 3.23072 | 2.72644 | 3.19431 | 3.55255 | 5.93027 | 4.53049 | 381 | n | - | - | - |  |
|     | 2.68625 | 4.42237 | 2.77472 | 2.73118 | 3.46366 | 2.40500 | 3.72441 | 3.29366 | 2.67742 | 2.69356 | 4.24702 | 2.90359 | 2.73752 | 3.18151 | 2.89813 | 2.37891 | 2.77519 | 2.98531 | 4.58489 | 3.61515 |     |   |   |   |   |  |
|     | 0.31741 | 2.71594 | 1.58074 | 1.15451 | 0.37864 | 0.52837 | 0.89053 |         |         |         |         |         |         |         |         |         |         |         |         |         |     |   |   |   |   |  |
| 213 | 2.56921 | 4.84332 | 3.23920 | 2.80257 | 2.76027 | 3.16344 | 3.78524 | 3.24316 | 2.73711 | 2.40277 | 3.93382 | 3.43120 | 1.97458 | 3.26536 | 2.82834 | 3.03292 | 2.92165 | 2.64420 | 5.39386 | 3.59379 | 388 | p | - | - | - |  |
|     | 2.68618 | 4.42225 | 2.77519 | 2.73123 | 3.46354 | 2.40513 | 3.72494 | 3.29354 | 2.67741 | 2.69355 | 4.24690 | 2.90347 | 2.73739 | 3.18146 | 2.89801 | 2.37887 | 2.77519 | 2.98518 | 4.58477 | 3.61503 |     |   |   |   |   |  |
|     | 0.03805 | 5.04825 | 3.47644 | 0.61958 | 0.77255 | 0.88056 | 0.53537 |         |         |         |         |         |         |         |         |         |         |         |         |         |     |   |   |   |   |  |
| 214 | 2.61711 | 5.31141 | 2.83562 | 2.55986 | 3.75539 | 2.37351 | 3.88726 | 3.70395 | 2.43621 | 3.35208 | 4.11398 | 2.00232 | 4.08777 | 2.99865 | 2.31135 | 2.75078 | 2.71907 | 3.54879 | 4.28939 | 4.38463 | 389 | n | - | - | - |  |
|     | 2.68618 | 4.42225 | 2.77519 | 2.73123 | 3.46354 | 2.40513 | 3.72494 | 3.29354 | 2.67741 | 2.69355 | 4.24690 | 2.90347 | 2.73739 | 3.18146 | 2.89801 | 2.37887 | 2.77519 | 2.98518 | 4.58477 | 3.61503 |     |   |   |   |   |  |
|     | 0.00943 | 5.06441 | 5.78676 | 0.61958 | 0.77255 | 0.93991 | 0.49538 |         |         |         |         |         |         |         |         |         |         |         |         |         |     |   |   |   |   |  |
| 215 | 2.68784 | 4.61252 | 3.98848 | 3.32881 | 2.59121 | 3.65523 | 2.07646 | 3.10013 | 3.27258 | 2.65175 | 3.71842 | 3.71066 | 4.31690 | 3.56595 |         |         |         |         |         |         |     |   |   |   |   |  |





|     |         |         |         |         |         |         |         |         |         |         |         |         |         |         |         |         |         |         |         |         |     |   |   |   |   |
|-----|---------|---------|---------|---------|---------|---------|---------|---------|---------|---------|---------|---------|---------|---------|---------|---------|---------|---------|---------|---------|-----|---|---|---|---|
| 265 | 2.53108 | 5.50309 | 2.69364 | 1.79494 | 4.84802 | 3.21484 | 3.73106 | 4.33389 | 2.22719 | 3.47001 | 4.54379 | 2.89924 | 3.86263 | 2.80686 | 2.27838 | 2.76533 | 2.60371 | 2.83775 | 5.93586 | 4.52499 | 456 | e | - | - | - |
|     | 2.68618 | 4.42225 | 2.77519 | 2.73123 | 3.46354 | 2.40513 | 3.72494 | 3.29354 | 2.67741 | 2.69355 | 4.24690 | 2.90347 | 2.73739 | 3.18146 | 2.89801 | 2.37887 | 2.77519 | 2.98518 | 4.58477 | 3.61503 |     |   |   |   |   |
|     | 0.00773 | 5.26259 | 5.98493 | 0.61958 | 0.77255 | 0.57328 | 0.82936 |         |         |         |         |         |         |         |         |         |         |         |         |         |     |   |   |   |   |
| 266 | 1.71678 | 4.44907 | 4.92177 | 4.31469 | 3.54717 | 3.86849 | 4.55177 | 1.57353 | 4.12285 | 1.87978 | 2.90505 | 3.99455 | 4.58470 | 4.27435 | 4.16844 | 3.25913 | 3.14872 | 2.03241 | 5.07695 | 3.89821 | 457 | i | - | - | - |
|     | 2.68618 | 4.42225 | 2.77519 | 2.73123 | 3.46354 | 2.40513 | 3.72494 | 3.29354 | 2.67741 | 2.69355 | 4.24690 | 2.90347 | 2.73739 | 3.18146 | 2.89801 | 2.37887 | 2.77519 | 2.98518 | 4.58477 | 3.61503 |     |   |   |   |   |
|     | 0.03058 | 5.26259 | 3.69137 | 0.61958 | 0.77255 | 0.57328 | 0.82936 |         |         |         |         |         |         |         |         |         |         |         |         |         |     |   |   |   |   |
| 267 | 1.70495 | 5.50163 | 2.53149 | 1.71108 | 4.84613 | 3.39976 | 3.94977 | 4.33237 | 2.59263 | 3.80667 | 4.54280 | 2.41342 | 3.74235 | 2.66618 | 2.95705 | 2.90655 | 3.07982 | 3.73938 | 5.93435 | 4.52261 | 458 | a | - | - | - |
|     | 2.68618 | 4.42225 | 2.77519 | 2.73123 | 3.46354 | 2.40513 | 3.72494 | 3.29354 | 2.67741 | 2.69355 | 4.24690 | 2.90347 | 2.73739 | 3.18146 | 2.89801 | 2.37887 | 2.77519 | 2.98518 | 4.58477 | 3.61503 |     |   |   |   |   |
|     | 0.03324 | 5.23991 | 3.59742 | 0.61958 | 0.77255 | 0.64590 | 0.74274 |         |         |         |         |         |         |         |         |         |         |         |         |         |     |   |   |   |   |
| 268 | 1.94681 | 5.48211 | 2.88052 | 2.22380 | 4.82745 | 3.14624 | 3.93139 | 4.31358 | 1.98573 | 3.78747 | 4.52275 | 2.89806 | 4.13781 | 2.15103 | 2.61075 | 2.50751 | 3.08628 | 3.43739 | 5.91459 | 4.50349 | 459 | a | - | - | - |
|     | 2.68618 | 4.42225 | 2.77519 | 2.73123 | 3.46354 | 2.40513 | 3.72494 | 3.29354 | 2.67741 | 2.69355 | 4.24690 | 2.90347 | 2.73739 | 3.18146 | 2.89801 | 2.37887 | 2.77519 | 2.98518 | 4.58477 | 3.61503 |     |   |   |   |   |
|     | 0.00811 | 5.21478 | 5.93712 | 0.61958 | 0.77255 | 0.71897 | 0.66798 |         |         |         |         |         |         |         |         |         |         |         |         |         |     |   |   |   |   |
| 269 | 2.24225 | 4.55769 | 4.24267 | 3.15213 | 3.52240 | 4.06947 | 3.19658 | 2.61458 | 3.45156 | 1.35571 | 3.44854 | 3.95783 | 4.44242 | 3.42698 | 3.32437 | 2.97162 | 3.15829 | 2.41674 | 5.16085 | 2.87926 | 460 | l | - | - | - |
|     | 2.68618 | 4.42225 | 2.77519 | 2.73123 | 3.46354 | 2.40513 | 3.72494 | 3.29354 | 2.67741 | 2.69355 | 4.24690 | 2.90347 | 2.73739 | 3.18146 | 2.89801 | 2.37887 | 2.77519 | 2.98518 | 4.58477 | 3.61503 |     |   |   |   |   |
|     | 0.05862 | 5.21478 | 2.96614 | 0.61958 | 0.77255 | 0.71897 | 0.66798 |         |         |         |         |         |         |         |         |         |         |         |         |         |     |   |   |   |   |
| 270 | 1.66140 | 4.38291 | 4.86333 | 4.25453 | 2.28811 | 4.15222 | 4.00305 | 2.51095 | 4.05971 | 2.21770 | 3.32601 | 4.28309 | 4.51678 | 4.20826 | 4.10082 | 3.10505 | 3.15596 | 2.48829 | 2.24813 | 2.73641 | 461 | a | - | - | - |
|     | 2.68618 | 4.42225 | 2.77519 | 2.73123 | 3.46354 | 2.40513 | 3.72494 | 3.29354 | 2.67741 | 2.69355 | 4.24690 | 2.90347 | 2.73739 | 3.18146 | 2.89801 | 2.37887 | 2.77519 | 2.98518 | 4.58477 | 3.61503 |     |   |   |   |   |
|     | 0.09924 | 5.16468 | 2.42183 | 0.61958 | 0.77255 | 0.74001 | 0.64838 |         |         |         |         |         |         |         |         |         |         |         |         |         |     |   |   |   |   |
| 271 | 2.03041 | 5.42403 | 2.41274 | 2.11742 | 4.76762 | 3.46929 | 3.78584 | 3.82985 | 2.18942 | 3.49802 | 3.85401 | 2.80192 | 4.08462 | 2.56320 | 2.61626 | 2.62931 | 2.70742 | 3.65497 | 5.85759 | 4.44753 | 462 | a | - | - | - |
|     | 2.68618 | 4.42225 | 2.77519 | 2.73123 | 3.46354 | 2.40513 | 3.72494 | 3.29354 | 2.67741 | 2.69355 | 4.24690 | 2.90347 | 2.73739 | 3.18146 | 2.89801 | 2.37887 | 2.77519 | 2.98518 | 4.58477 | 3.61503 |     |   |   |   |   |
|     | 0.00615 | 5.09415 | *       | 0.61958 | 0.77255 | 0.00000 | *       |         |         |         |         |         |         |         |         |         |         |         |         |         |     |   |   |   |   |

//
