# Supplementary material for: Unique high Arctic methane metabolizing community revealed through in situ 13CH4-DNA-SIP enrichment in concert with genome binning
Source: PubMed Central journal article supplement (PMC8782848; doi:10.1038/s41598-021-04486-z), 2022-01-21
Supplement: 41598_2021_4486_MOESM2_ESM.pdf [file 41598_2021_4486_MOESM2_ESM.pdf]

RID: 4XBURU9G016

Job Title:2824025549 16S ribosomal RNA [Ga0376100\_395...

Program: BLASTN

Database: nt Nucleotide collection (nt)

Query #1: 2824025549 16S ribosomal RNA [Ga0376100\_395 : Chloroflexi bacterium B\_21] (+)strand Query ID: lcl|Query\_23531

Length: 147

Sequences producing significant alignments:

| Description                                                       | Max Score | Total Score | Query cover | E Value | Ident | Accession  |
|-------------------------------------------------------------------|-----------|-------------|-------------|---------|-------|------------|
| Uncultured bacterium clone Bfb08-02-E7 16S ribosomal RNA gene,... | 187       | 187         | 95%         | 1e-43   | 90.71 | JF910611.1 |
| Uncultured bacterium clone BFO1035 16S ribosomal RNA gene,...     | 182       | 182         | 95%         | 5e-42   | 90.21 | KT460527.1 |
| Uncultured bacterium clone OTU2149 16S ribosomal RNA gene,...     | 176       | 176         | 95%         | 2e-40   | 89.29 | KY545276.1 |
| Uncultured bacterium clone GB7N87004JVMK8 small subunit...        | 176       | 176         | 82%         | 2e-40   | 92.62 | HM720389.1 |
| Uncultured bacterium clone GB7N87004JH4RH small subunit...        | 176       | 176         | 82%         | 2e-40   | 92.62 | HM716556.1 |
| Uncultured bacterium clone GB7N87004IO73K small subunit...        | 176       | 176         | 82%         | 2e-40   | 92.62 | HM715742.1 |
| Uncultured bacterium clone GB7N87004H9AT2 small subunit...        | 176       | 176         | 82%         | 2e-40   | 92.62 | HM713917.1 |
| Uncultured bacterium clone GB7N87004I4MHY small subunit...        | 176       | 176         | 82%         | 2e-40   | 92.62 | HM713504.1 |
| Uncultured bacterium clone GB7N87004ISPQK small subunit...        | 176       | 176         | 82%         | 2e-40   | 92.62 | HM709438.1 |
| Uncultured bacterium clone GB7N87004IG12I small subunit...        | 171       | 171         | 82%         | 1e-38   | 91.80 | HM715920.1 |
| Uncultured bacterium clone GB7N87004H555B small subunit...        | 171       | 171         | 82%         | 1e-38   | 91.80 | HM714733.1 |
| Uncultured bacterium clone GB7N87004I58D4 small subunit...        | 171       | 171         | 82%         | 1e-38   | 91.80 | HM713896.1 |
| Uncultured bacterium clone GB7N87004IN8XF small subunit...        | 171       | 171         | 82%         | 1e-38   | 91.80 | HM713793.1 |
| Uncultured bacterium clone GB7N87004IQBTD small subunit...        | 171       | 171         | 82%         | 1e-38   | 91.80 | HM713668.1 |
| Uncultured bacterium clone GB7N87003F5Y2E small subunit...        | 171       | 171         | 82%         | 1e-38   | 91.80 | HM658570.1 |
| Uncultured bacterium clone GB7N87003G6C5Q small subunit...        | 171       | 171         | 82%         | 1e-38   | 91.80 | HM654716.1 |
| Uncultured bacterium clone GB7N87003GMUPF small subunit...        | 171       | 171         | 82%         | 1e-38   | 91.80 | HM654342.1 |
| Uncultured bacterium clone GB7N87003G17CM small subunit...        | 171       | 171         | 82%         | 1e-38   | 91.80 | HM651539.1 |
| Uncultured bacterium clone GB7N87003FJ4FB small subunit...        | 171       | 171         | 82%         | 1e-38   | 91.80 | HM649901.1 |
| Uncultured bacterium clone OTU7640 16S ribosomal RNA gene,...     | 169       | 169         | 95%         | 4e-38   | 88.65 | KY547645.1 |
| Uncultured bacterium clone OTU5903 16S ribosomal RNA gene,...     | 167       | 167         | 95%         | 1e-37   | 88.11 | KY545877.1 |
| Uncultured bacterium clone OTU804 16S ribosomal RNA gene,...      | 167       | 167         | 95%         | 1e-37   | 88.03 | KY544053.1 |
| Uncultured bacterium clone OTU1732 16S ribosomal RNA gene,...     | 167       | 167         | 95%         | 1e-37   | 88.03 | KY543657.1 |
| Uncultured bacterium clone OTU4307 16S ribosomal RNA gene,...     | 165       | 165         | 95%         | 5e-37   | 88.03 | KY545803.1 |
| Uncultured bacterium clone OTU5395 16S ribosomal RNA gene,...     | 165       | 165         | 95%         | 5e-37   | 87.94 | KY545512.1 |
| Uncultured bacterium clone OTU1283 16S ribosomal RNA gene,...     | 165       | 165         | 95%         | 5e-37   | 87.67 | KY543062.1 |
| Uncultured bacterium clone KH-T5-171 16S ribosomal RNA gene,...   | 165       | 165         | 95%         | 5e-37   | 88.11 | KU930024.1 |
| Uncultured bacterium clone QM-CK-95 16S ribosomal RNA gene,...    | 165       | 165         | 93%         | 5e-37   | 88.49 | KU929206.1 |
| Uncultured bacterium clone BFO15046 16S ribosomal RNA gene,...    | 165       | 165         | 95%         | 5e-37   | 88.11 | KT460604.1 |
| Uncultured bacterium clone GB7N87003FWKPN small subunit...        | 165       | 165         | 82%         | 5e-37   | 90.98 | HM723702.1 |
| Uncultured bacterium clone GB7N87004IK9IA small subunit...        | 165       | 165         | 82%         | 5e-37   | 90.98 | HM709136.1 |
| Uncultured bacterium clone OTU9719 16S ribosomal RNA gene,...     | 163       | 163         | 95%         | 2e-36   | 87.86 | KY546786.1 |
| Uncultured bacterium clone OTU2887 16S ribosomal RNA gene,...     | 163       | 163         | 95%         | 2e-36   | 87.94 | KY545320.1 |
| Uncultured bacterium clone OTU4720 16S ribosomal RNA gene,...     | 163       | 163         | 94%         | 2e-36   | 87.94 | KY545273.1 |
| Uncultured bacterium clone OTU2179 16S ribosomal RNA gene,...     | 163       | 163         | 95%         | 2e-36   | 87.94 | KY544094.1 |
| Uncultured bacterium clone OTU1947 16S ribosomal RNA gene,...     | 163       | 163         | 95%         | 2e-36   | 88.03 | KY543692.1 |
| Uncultured bacterium clone QM-T2-28 16S ribosomal RNA gene,...    | 163       | 163         | 94%         | 2e-36   | 88.03 | KU928505.1 |
| Uncultured bacterium clone BFO15038 16S ribosomal RNA gene,...    | 163       | 163         | 95%         | 2e-36   | 88.11 | KT460596.1 |
| Uncultured bacterium clone BFO15009 16S ribosomal RNA gene,...    | 163       | 163         | 95%         | 2e-36   | 88.11 | KT460567.1 |
| Uncultured bacterium clone BTE15052 16S ribosomal RNA gene,...    | 163       | 163         | 94%         | 2e-36   | 88.03 | KT460480.1 |
| Uncultured bacterium clone LG16 16S ribosomal RNA gene, partia... | 163       | 163         | 94%         | 2e-36   | 88.03 | JX133504.1 |
| Uncultured Chloroflexi bacterium clone TSD_20 16S ribosomal RN... | 161       | 161         | 84%         | 6e-36   | 90.32 | MH174131.1 |
| Uncultured bacterium clone OTU3995 16S ribosomal RNA gene,...     | 161       | 161         | 94%         | 6e-36   | 87.94 | KY546566.1 |
| Uncultured bacterium clone OTU1423 16S ribosomal RNA gene,...     | 161       | 161         | 95%         | 6e-36   | 87.50 | KY543117.1 |
| Uncultured bacterium clone OTU4253 16S ribosomal RNA gene,...     | 159       | 159         | 95%         | 2e-35   | 87.14 | KY546520.1 |
| Uncultured bacterium clone OTU3038 16S ribosomal RNA gene,...     | 159       | 159         | 95%         | 2e-35   | 86.99 | KY545602.1 |
| Uncultured bacterium clone BFO15013 16S ribosomal RNA gene,...    | 159       | 159         | 95%         | 2e-35   | 87.41 | KT460571.1 |
| Uncultured bacterium clone BFO1057 16S ribosomal RNA gene,...     | 159       | 159         | 95%         | 2e-35   | 87.41 | KT460549.1 |

Select Alignments:

>Uncultured bacterium clone Bfb08-02-E7 16S ribosomal RNA gene, partial sequence  
Sequence ID: JF910611.1 Length: 331  
Range 1: 13 to 152

Score:187 bits(101), Expect:1e-43,  
Identities:127/140(91%), Gaps:0/140(0%), Strand: Plus/Plus

Query 8 AGAGTTTGATCCTGGCTCAGGACAAACGCTGGCGGCGTGCATAACACATGCAAGTCGAAC 67  
|||||  
Sbjct 13 AGAGTTTGATCCTGGCTCAGGACAAACGCTGGCGGCGTGCATAACACATGCAAGTCGGAC 72

Query 68 GAGTGTAGCGGCTTCGGCTGGTACATGAGTGGCGGACGGGTGAGTAACACGTGGATGACC 127  
||| |  
Sbjct 73 GAGCGGGGTGGCTTCGGCTGCTTCGCGAGTGGCGGACGGGTGCGTAACACGTGGATGACC 132

Query 128 TGCCTTGCATGGGGGATAC 147  
|||||  
Sbjct 133 TGCCTCGCGGTGGGGGATAC 152

>Uncultured bacterium clone BFO1035 16S ribosomal RNA gene, partial sequence  
Sequence ID: KT460527.1 Length: 902  
Range 1: 1 to 140

Score:182 bits(98), Expect:5e-42,  
Identities:129/143(90%), Gaps:6/143(4%), Strand: Plus/Plus

Query 8 AGAGTTTGATCCTGGCTCAGGACAAACGCTGGCGGCGTGCATAACACATGCAAGTCGAAC 67  
|||||  
Sbjct 1 AGAGTTTGATCCTGGCTCAGGACAAACGCTGGCGGCGTGCATAACACATGCAAGTCGAAC 60

Query 68 GAGTGTAGCGGC-TTCGGCTGGTACAT-GAGTGGCGGACGGGTGAGTAACACGTGGATGA 125  
| | | | |  
Sbjct 61 G-GGGTGGCGTCTTTCGGGATGT-CATCGAGTGGCGGACGGGTGAGTAACACGTGGATGA 118

Query 126 CCTGCCT-TGCGATGGGGGATAC 147  
|||||  
Sbjct 119 CTGCGGATGCG-TGGGGGATAC 140

>Uncultured Chloroflexi bacterium clone TSD\_20 16S ribosomal RNA gene, partial sequence  
Sequence ID: MH174131.1 Length: 785  
Range 1: 1 to 122

Score:161 bits(87), Expect:6e-36,  
Identities:112/124(90%), Gaps:2/124(1%), Strand: Plus/Plus

Query 8 AGAGTTTGATCCTGGCTCAGGACAAACGCTGGCGGCGTGCATAACACATGCAAGTCGAAC 67  
|||||  
Sbjct 1 AGAGTTTGATCCTGGCTCAGGACAAACGCTGGCGGCGTGCATTAAACATGCAAGTCGAAC 60

Query 68 GAGTGTAGCGGCTTCGGCTGGTACATGAGTGGCGGACGGGTGAGTAACACGTGGATGACC 127  
| | | | |  
Sbjct 61 G-GTGTATGGGCTTCGGTTCGTGCAT-AGTGGCGGACGGGTGAGTAGCACGTGGATGACC 118

Query 128 TGCC 131  
|||  
Sbjct 119 TGCC 122
