# Supplementary material for: Unique high Arctic methane metabolizing community revealed through in situ 13CH4-DNA-SIP enrichment in concert with genome binning
Source: PubMed Central journal article supplement (PMC8782848; doi:10.1038/s41598-021-04486-z), 2022-01-21
Supplement: 41598_2021_4486_MOESM3_ESM.pdf [file 41598_2021_4486_MOESM3_ESM.pdf]

## Supplementary File S3- 3D Modeling Results

MAG #21 3D protein modeling of the AA sequences of gene 573136 (*mmoX*) and two genes of interest (573135 and 573134) that were directly upstream of *mmoX*. The modeling was performed with SWISS-MODEL (Waterhouse et al 2018) and I-TASSER (Yang et al 2015). The three SWISS-MODEL reports are on pages 2-15 of this PDF document, followed by the three I-TASSER reports on pages 16-18. Overall the 3D modeling results corroborated the Pfam analysis/annotation results for all three MAG #21 genes.

For MAG #21's *mmoX* gene the modeling results based on SWISS-MODEL identified several possible PDB (protein data base) templates that were most closely related to the 3D structure of *mmoX* on MAG #21. These included several templates, with methane monooxygenase (sMMO) having the highest sequence similarity of all the templates to our *mmoX* gene (see graphic below). The MAG #21 *mmoX*'s 3D models that were based on these matched templates in the SWISS-MODEL are reported on pages 2-5 of this PDF document.

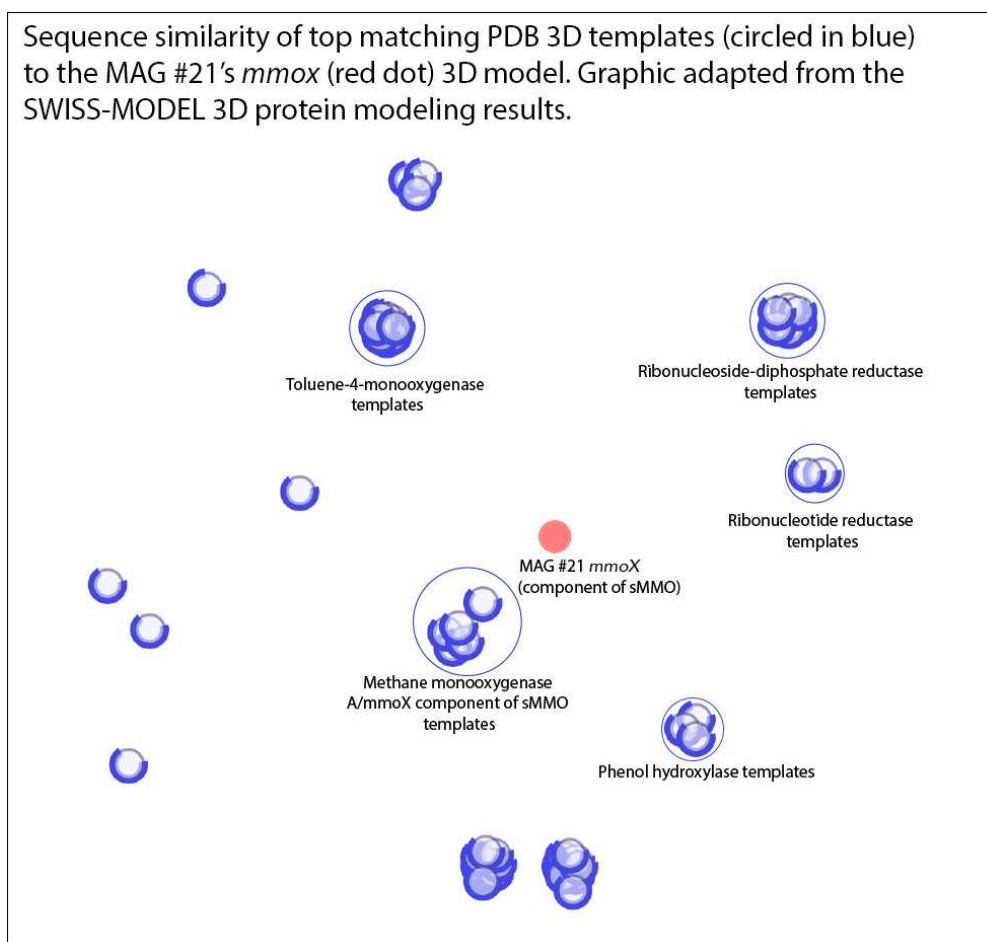

For MAG #21's *mmoX* modeling with I-TASSER, the top PDB template hits included an aldehyde deformylating oxidase, R2-like ligand-binding oxidase, methane monooxygenase, and arylamine oxygenase. While MAG #21's *mmoX* could be structurally similar to any of these matches, the biological annotations and predicted function using the subsequent COACH/COFACTOR analysis (Zhang et al 2017) inferred the top function of MAG #21's *mmoX* to be a methane monooxygenase based on Enzyme Commission (EC) number and active site. The I-TASSER and COACH/COFACTOR results are in the report on page 16 of this PDF.

### References:

Waterhouse A, Bertoni M, Bienert S, Studer G, Tauriello G, Gumienny R *et al* (2018). SWISS-MODEL: homology modelling of protein structures and complexes. *Nucleic acids research* **46**: W296-W303.

Yang J, Yan R, Roy A, Xu D, Poisson J, Zhang Y (2015). The I-TASSER Suite: protein structure and function prediction. *Nature methods* **12**: 7.

Zhang C, Freddolino PL, Zhang Y (2017). COFACTOR: improved protein function prediction by combining structure, sequence and protein-protein interaction information. *Nucleic acids research* **45**: W291-W299.

# SWISS-MODEL Homology Modelling Report

## Model Building Report

This document lists the results for the homology modelling project "gene\_573136\_mmx" submitted to SWISS-MODEL workspace on April 27, 2020, 6:25 p.m.. The submitted primary amino acid sequence is given in Table T1.

If you use any results in your research, please cite the relevant publications:

- Waterhouse, A., Bertoni, M., Bienert, S., Studer, G., Tauriello, G., Gumienny, R., Heer, F.T., de Beer, T.A.P., Rempfer, C., Bordoli, L., Lepore, R., Schwede, T. SWISS-MODEL: homology modelling of protein structures and complexes. *Nucleic Acids Res.* 46(W1), W296-W303 (2018). [doi>](#)
- Guex, N., Peitsch, M.C., Schwede, T. Automated comparative protein structure modeling with SWISS-MODEL and Swiss-PdbViewer: A historical perspective. *Electrophoresis* 30, S162-S173 (2009). [doi>](#)
- Bienert, S., Waterhouse, A., de Beer, T.A.P., Tauriello, G., Studer, G., Bordoli, L., Schwede, T. The SWISS-MODEL Repository - new features and functionality. *Nucleic Acids Res.* 45, D313-D319 (2017). [doi>](#)
- Studer, G., Rempfer, C., Waterhouse, A.M., Gumienny, G., Haas, J., Schwede, T. QMEANDisCo - distance constraints applied on model quality estimation. *Bioinformatics* 36, 1765-1771 (2020). [doi>](#)
- Bertoni, M., Kiefer, F., Biasini, M., Bordoli, L., Schwede, T. Modeling protein quaternary structure of homo- and hetero-oligomers beyond binary interactions by homology. *Scientific Reports* 7 (2017). [doi>](#)

## Results

The SWISS-MODEL template library (SMTL version 2020-04-22, PDB release 2020-04-17) was searched with BLAST (Camacho et al.) and HHblits (Remmert et al.) for evolutionary related structures matching the target sequence in Table T1. For details on the template search, see Materials and Methods. Overall 149 templates were found (Table T2).

## Models

The following models were built (see Materials and Methods "Model Building"):

| Model #01                                                                         | File | Built with    | Oligo-State                   | Ligands               | GMQE | QMEAN |
|-----------------------------------------------------------------------------------|------|---------------|-------------------------------|-----------------------|------|-------|
|  | PDB  | ProMod3 3.0.0 | monomer (matching prediction) | 2 x FE: FE (III) ION; | 0.35 | -4.17 |

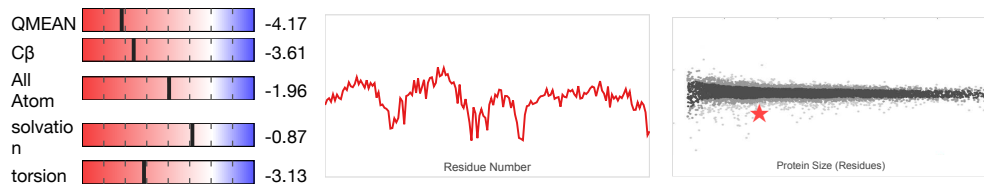

| Template | Seq Identity | Oligo-state | QSQE | Found by | Method | Resolution | Seq Similarity | Range    | Coverage | Description                                   |
|----------|--------------|-------------|------|----------|--------|------------|----------------|----------|----------|-----------------------------------------------|
| 1mmo.1.D | 18.99        | homo-dimer  | 0.15 | HHblits  | X-ray  | 2.20Å      | 0.28           | 55 - 219 | 0.63     | METHANE MONOOXYGENASE HYDROLASE (ALPHA CHAIN) |

## Included Ligands

| Ligand | Description |
|--------|-------------|
| 2 x FE |             |

| 2 x FE | FE (III) ION |
|--------|--------------|
|        |              |

## Excluded ligands

| Ligand Name.Number | Reason for Exclusion        | Description  |
|--------------------|-----------------------------|--------------|
| ACY.3              | Not biologically relevant.  | ACETIC ACID  |
| ACY.6              | Not biologically relevant.  | ACETIC ACID  |
| FE.1               | Binding site not conserved. | FE (III) ION |
| FE.2               | Binding site not conserved. | FE (III) ION |

Target MSTAFAEQVRTLVSRRDPAYRPAMFIDEAEKKALAEKLGDASNYDLGLLREMVAQDPDNYEFRKALVSGIVSAEYAGIDA  
1mmo.1.D -----VHPKWNETMKVVSNFLEVGEYNAIAA

Target FSRKVCEWQTWPVPWELIMAMARQWDEVVRAQLGTELLKSYGGEV---GEYPD---TLAGSPNQATAAV-AQGQADV  
1mmo.1.D TGLMW---DSAQAA-EQKNGYLAQVLDIEIRHTRHCAYVNYFPAKNGQDPAGHNDARRTRTIGPLWKGMRVFSDFIS--

Target MRDPVIVLSVTNVALEGAALD-LFKGTSDLGRKVNDDMLRLVYDYNWADEVVHTAIGDYFVKVLCGDNPAEEARALRAHA  
1mmo.1.D -GDAVECSLNLQLVGEACFTNPLIVAVTEWAAANGDEITPTVFLSIEDELHDMANGYQTVVSIAND-----

Target MFEGMRERLSGQQAIEIR  
1mmo.1.D -----

| Model #02                                                                           | File | Built with    | Oligo-State | Ligands               | GMQE | QMEAN |
|-------------------------------------------------------------------------------------|------|---------------|-------------|-----------------------|------|-------|
|  | PDB  | ProMod3 3.0.0 | monomer     | 2 x FE: FE (III) ION; | 0.33 | -4.80 |

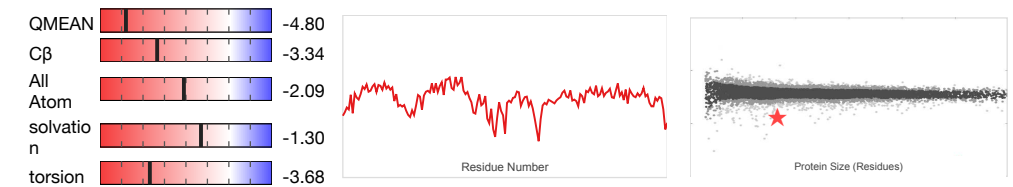

| Template | Seq Identity | Oligo-state | QSQE | Found by | Method | Resolution | Seq Similarity | Range    | Coverage | Description                              |
|----------|--------------|-------------|------|----------|--------|------------|----------------|----------|----------|------------------------------------------|
| 6d7k.1.A | 20.25        | monomer     | 0.00 | HHblits  | X-ray  | 2.60Å      | 0.28           | 55 - 219 | 0.63     | Methane monooxygenase hydroxylase, MmoX1 |

## Included Ligands

| Ligand | Description  |
|--------|--------------|
| 2 x FE | FE (III) ION |

## Excluded ligands

| Ligand Name.Number | Reason for Exclusion        | Description  |
|--------------------|-----------------------------|--------------|
| FE.5               | Binding site not conserved. | FE (III) ION |
| FE.6               | Binding site not conserved. | FE (III) ION |

|       |                             |                 |
|-------|-----------------------------|-----------------|
| FMT.4 | Not biologically relevant.  | FORMIC ACID     |
| FMT.8 | Not biologically relevant.  | FORMIC ACID     |
| HEZ.3 | Binding site not conserved. | HEXANE-1,6-DIOL |
| HEZ.7 | Binding site not conserved. | HEXANE-1,6-DIOL |

Target 6d7k.1.A MSTAFAEQVRTLVSRDDPAYRPAMFIDEAEKKALAEKLGASNYDLGLLREMVAQDPDNYEFRKALVSGIVSAEYAGIDA  
-----VHPRWGETMKVISNFLEVGEYNAIAA

Target 6d7k.1.A FSRKVCEWQTWPVPELIMAMARQWDEVHRHAQLGTELLKSYGGEV---GEY---DTLAGSPPNQATAAV-AQGQGADV  
SAMLW---DSATAA-EQKNGYLAQVLDEIRHTHQCAFINHYYSKHYHDPAGHNDARRTRAIGPLWKGMKRVFADGFIIS--

Target 6d7k.1.A MRDPVISLSVTNVALEGAALD-LFKGTSDLGRKVNDDLMRLVYDYNWADEVHTHTAIGDYFVKVLCGPNPAEEARALRAHA  
-GDAVECSVNLQLVGEACFTNPLIVAVTEWASANGDEITPTVFLSVETDELHDMANGYQTVVSIAND-----

Target 6d7k.1.A MFEGRERLSGQQAIEIR  
-----

| Model #04                                                                        | File | Built with    | Oligo-State                   | Ligands               | GMQE | QMEAN |
|----------------------------------------------------------------------------------|------|---------------|-------------------------------|-----------------------|------|-------|
|  | PDB  | ProMod3 3.0.0 | monomer (matching prediction) | 2 x FE: FE (III) ION; | 0.32 | -4.39 |

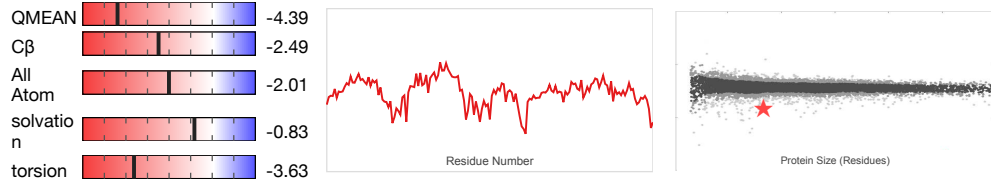

| Template | Seq Identity | Oligo-state | QSQE | Found by | Method | Resolution | Seq Similarity | Range    | Coverage | Description                                    |
|----------|--------------|-------------|------|----------|--------|------------|----------------|----------|----------|------------------------------------------------|
| 1fz4.1.A | 18.35        | homo-dimer  | 0.16 | HHblits  | X-ray  | 2.38Å      | 0.28           | 55 - 219 | 0.63     | METHANE MONOOXYGENASE COMPONENT A, ALPHA CHAIN |

#### Included Ligands

| Ligand | Description  |
|--------|--------------|
| 2 x FE | FE (III) ION |

#### Excluded ligands

| Ligand Name.Number | Reason for Exclusion        | Description  |
|--------------------|-----------------------------|--------------|
| CA.5               | Binding site not conserved. | CALCIUM ION  |
| CA.6               | Not in contact with model.  | CALCIUM ION  |
| CA.7               | Binding site not conserved. | CALCIUM ION  |
| FE.3               | Binding site not conserved. | FE (III) ION |
| FE.4               | Binding site not conserved. | FE (III) ION |

|       |                            |             |
|-------|----------------------------|-------------|
| FMT.8 | Not biologically relevant. | FORMIC ACID |
|-------|----------------------------|-------------|

Target 1fz4.1.A MSTAFAEQVRTLVSRDDPAYRPAMFIDEAEKKALAEKLGASNYDLGLLREMVAQDPDNYEFRKALVSGIVSAEYAGIDA  
-----VHPKWNETMKVSNFLEVGEYNAIAA

Target 1fz4.1.A FSRKVCEWQTWPVPELIMAMARQWDEVHRHAQLGTELLKSYGGEV---GEY---DTLAGSPPNQATAAV-AQGQGADV  
TGMLW---DSAQAA-EQKNGYLAQVLDEIRHTHQCAVYVNYFAKNGQDPAGHNDARRTRTIGPLWKGMKRVFSDGFIIS--

Target 1fz4.1.A MRDPVISLSVTNVALEGAALD-LFKGTSDLGRKVNDDLMRLVYDYNWADEVHTHTAIGDYFVKVLCGPNPAEEARALRAHA  
-GDAVECSLNLQLVGEACFTNPLIVAVTEWAAANGDEITPTVFLSIETDELHDMANGYQTVVSIAND-----

Target 1fz4.1.A MFEGRERLSGQQAIEIR  
-----

| Model #03                                                                           | File | Built with    | Oligo-State                   | Ligands               | GMQE | QMEAN |
|-------------------------------------------------------------------------------------|------|---------------|-------------------------------|-----------------------|------|-------|
|  | PDB  | ProMod3 3.0.0 | monomer (matching prediction) | 2 x FE: FE (III) ION; | 0.32 | -5.05 |

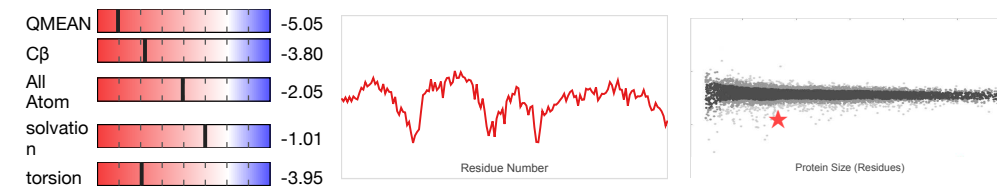

| Template | Seq Identity | Oligo-state | QSQE | Found by | Method | Resolution | Seq Similarity | Range    | Coverage | Description                                   |
|----------|--------------|-------------|------|----------|--------|------------|----------------|----------|----------|-----------------------------------------------|
| 4gam.1.B | 18.35        | homo-dimer  | 0.00 | HHblits  | X-ray  | 2.90Å      | 0.28           | 55 - 219 | 0.63     | Methane monooxygenase component A alpha chain |

#### Included Ligands

| Ligand | Description  |
|--------|--------------|
| 2 x FE | FE (III) ION |

#### Excluded ligands

| Ligand Name.Number | Reason for Exclusion        | Description  |
|--------------------|-----------------------------|--------------|
| FE.3               | Binding site not conserved. | FE (III) ION |
| FE.4               | Binding site not conserved. | FE (III) ION |

Target 4gam.1.B MSTAFAEQVRTLVSRDDPAYRPAMFIDEAEKKALAEKLGASNYDLGLLREMVAQDPDNYEFRKALVSGIVSAEYAGIDA  
-----VHPKWNETMKVSNFLEVGEYNAIAA

Target 4gam.1.B FSRKVCEWQTWPVPELIMAMARQWDEVHRHAQLGTELLKSYGGEV---GEY---DTLAGSPPNQATAAV-AQGQGADV  
TGMLW---DSAQAA-EQKNGYLAQVLDEIRHTHQCAVYVNYFAKNGQDPAGHNDARRTRTIGPLWKGMKRVFSDGFIIS--

Target MRDPVISLSVTNVALEGAALD-LFKGTSDLGRKVNDDLMRLVYDYNWADEVHTHTAIGDYFVKVLCGPNPAEEARALRAHA



| Template | Seq Identity | Oligo-state | QSQE | Found by | Method | Resolution | Seq Similarity | Coverage | Description                                          |
|----------|--------------|-------------|------|----------|--------|------------|----------------|----------|------------------------------------------------------|
| 6sf5.1.B | 18.13        | homo-dimer  | 0.12 | HHblits  | X-ray  | 1.90Å      | 0.28           | 0.64     | Ribonucleoside-diphosphate reductase, beta subunit 1 |
| 6sf4.1.A | 18.13        | homo-dimer  | 0.08 | HHblits  | X-ray  | 1.70Å      | 0.28           | 0.64     | Ribonucleoside-diphosphate reductase, beta subunit 1 |
| 2inp.1.A | 16.85        | homo-dimer  | -    | HHblits  | X-ray  | 2.30Å      | 0.27           | 0.71     | Phenol hydroxylase component pHN                     |
| 3dhg.2.B | 14.29        | monomer     | -    | HHblits  | X-ray  | 1.85Å      | 0.25           | 0.73     | toluene 4-monooxygenase hydroxylase beta subunit     |
| 3dhg.1.B | 14.29        | monomer     | -    | HHblits  | X-ray  | 1.85Å      | 0.25           | 0.73     | toluene 4-monooxygenase hydroxylase beta subunit     |
| 3dhh.1.B | 14.29        | monomer     | -    | HHblits  | X-ray  | 1.94Å      | 0.25           | 0.73     | toluene 4-monooxygenase hydroxylase beta subunit     |
| 5tdv.1.B | 14.29        | homo-dimer  | 0.24 | HHblits  | X-ray  | 2.00Å      | 0.25           | 0.73     | Toluene-4-monooxygenase system protein E             |
| 5tds.1.B | 14.29        | homo-dimer  | 0.22 | HHblits  | X-ray  | 1.72Å      | 0.25           | 0.73     | Toluene-4-monooxygenase system protein E             |
| 3ge8.1.B | 14.29        | homo-dimer  | 0.23 | HHblits  | X-ray  | 2.19Å      | 0.25           | 0.73     | Toluene-4-monooxygenase system protein E             |
| 1t0s.1.B | 11.54        | homo-dimer  | 0.09 | HHblits  | X-ray  | 2.20Å      | 0.25           | 0.73     | toluene, o-xylene monooxygenase oxygenase subunit    |
| 3rmk.1.B | 13.33        | monomer     | -    | HHblits  | X-ray  | 1.95Å      | 0.25           | 0.72     | Toluene-4-monooxygenase system protein E             |
| 3q3o.1.B | 13.33        | homo-dimer  | 0.26 | HHblits  | X-ray  | 1.95Å      | 0.25           | 0.72     | Toluene-4-monooxygenase system protein E             |
| 2inc.1.B | 11.48        | homo-dimer  | 0.11 | HHblits  | X-ray  | 1.85Å      | 0.25           | 0.73     | Toluene, o-xylene monooxygenase oxygenase subunit    |
| 2ind.1.B | 11.54        | homo-dimer  | 0.20 | HHblits  | X-ray  | 2.20Å      | 0.25           | 0.73     | Toluene, o-xylene monooxygenase oxygenase subunit    |
| 6cwp.1.A | 18.13        | homo-dimer  | 0.05 | HHblits  | X-ray  | 1.92Å      | 0.27           | 0.64     | Ribonucleotide reductase                             |
| 6qrz.1.A | 16.88        | homo-dimer  | 0.03 | HHblits  | 2DX    | 3.00Å      | 0.29           | 0.64     | Ribonucleoside-diphosphate reductase                 |
| 3u52.1.C | 10.67        | homo-dimer  | 0.02 | HHblits  | X-ray  | 1.95Å      | 0.24           | 0.71     | Phenol hydroxylase component pHL                     |
| 1mmo.1.D | 18.99        | homo-dimer  | 0.15 | HHblits  | X-ray  | 2.20Å      | 0.28           | 0.63     | METHANE MONOOXYGENASE HYDROLASE (ALPHA CHAIN)        |
| 2inn.1.A | 18.13        | monomer     | -    | HHblits  | X-ray  | 2.70Å      | 0.28           | 0.64     | Phenol hydroxylase component pHN                     |
| 4p1b.1.A | 18.87        | homo-dimer  | 0.07 | HHblits  | X-ray  | 2.05Å      | 0.28           | 0.64     | Toluene-4-monooxygenase system protein A             |
| 3rmk.1.A | 18.87        | monomer     | -    | HHblits  | X-ray  | 1.95Å      | 0.28           | 0.64     | Toluene-4-monooxygenase system protein A             |
| 3i5j.1.A | 18.75        | homo-dimer  | -    | HHblits  | X-ray  | 1.90Å      | 0.28           | 0.64     | Toluene-4-monooxygenase system protein A             |
| 3dhg.2.A | 18.75        | monomer     | -    | HHblits  | X-ray  | 1.85Å      | 0.28           | 0.64     | toluene 4-monooxygenase hydroxylase alpha subunit    |
| 5tdv.1.A | 18.87        | homo-dimer  | 0.02 | HHblits  | X-ray  | 2.00Å      | 0.28           | 0.64     | Toluene-4-monooxygenase system protein A             |
| 3ge8.1.A | 18.87        | homo-dimer  | -    | HHblits  | X-ray  | 2.19Å      | 0.28           | 0.64     | Toluene-4-monooxygenase system protein A             |

|          |       |               |      |         |       |       |      |      |                                                      |
|----------|-------|---------------|------|---------|-------|-------|------|------|------------------------------------------------------|
| 5tdt.1.D | 18.87 | homo-dimer    | 0.04 | HHblits | X-ray | 1.82Å | 0.28 | 0.64 | Toluene-4-monooxygenase system protein A             |
| 5tds.1.A | 18.87 | homo-dimer    | -    | HHblits | X-ray | 1.72Å | 0.28 | 0.64 | Toluene-4-monooxygenase system protein A             |
| 5olk.1.D | 15.52 | homo-tetramer | 0.00 | HHblits | X-ray | 2.45Å | 0.27 | 0.70 | Ribonucleoside-diphosphate reductase, beta subunit 1 |
| 5olk.1.A | 15.52 | homo-tetramer | 0.00 | HHblits | X-ray | 2.45Å | 0.27 | 0.70 | Ribonucleoside-diphosphate reductase, beta subunit 1 |
| 5olk.1.B | 15.52 | homo-tetramer | 0.00 | HHblits | X-ray | 2.45Å | 0.27 | 0.70 | Ribonucleoside-diphosphate reductase, beta subunit 1 |
| 5olk.1.C | 15.52 | homo-tetramer | 0.00 | HHblits | X-ray | 2.45Å | 0.27 | 0.70 | Ribonucleoside-diphosphate reductase, beta subunit 1 |
| 3rng.1.A | 19.75 | homo-dimer    | -    | HHblits | X-ray | 2.81Å | 0.28 | 0.63 | Toluene o-xylene monooxygenase component             |
| 3ri7.1.A | 18.24 | homo-dimer    | 0.06 | HHblits | X-ray | 2.10Å | 0.28 | 0.64 | Toluene-4-monooxygenase system protein A             |
| 6d7k.1.A | 20.25 | monomer       | -    | HHblits | X-ray | 2.60Å | 0.28 | 0.63 | Methane monooxygenase hydroxylase, MmoX1             |
| 6cwo.1.A | 18.13 | homo-dimer    | 0.02 | HHblits | X-ray | 1.87Å | 0.27 | 0.64 | Ribonucleotide reductase                             |
| 3rne.1.A | 18.99 | homo-dimer    | -    | HHblits | X-ray | 2.50Å | 0.28 | 0.63 | Toluene o-xylene monooxygenase component             |
| 1t0s.1.A | 18.99 | homo-dimer    | -    | HHblits | X-ray | 2.20Å | 0.28 | 0.63 | toluene, o-xylene monooxygenase oxygenase subunit    |
| 3u52.1.A | 17.50 | homo-dimer    | -    | HHblits | X-ray | 1.95Å | 0.28 | 0.64 | Phenol hydroxylase component pHN                     |
| 3rnb.1.A | 18.99 | homo-dimer    | -    | HHblits | X-ray | 2.64Å | 0.28 | 0.63 | Toluene o-xylene monooxygenase component             |
| 3rnf.1.A | 18.99 | homo-dimer    | 0.03 | HHblits | X-ray | 2.20Å | 0.28 | 0.63 | Toluene o-xylene monooxygenase component             |
| 3rn9.1.A | 18.99 | homo-dimer    | -    | HHblits | X-ray | 2.80Å | 0.28 | 0.63 | Toluene o-xylene monooxygenase component             |
| 3n20.1.A | 18.99 | homo-dimer    | -    | HHblits | X-ray | 1.90Å | 0.28 | 0.63 | Toluene o-xylene monooxygenase component             |
| 3n1x.1.A | 18.99 | homo-dimer    | -    | HHblits | X-ray | 2.40Å | 0.28 | 0.63 | Toluene o-xylene monooxygenase component             |
| 3n1z.1.A | 18.99 | homo-dimer    | 0.01 | HHblits | X-ray | 2.90Å | 0.28 | 0.63 | Toluene o-xylene monooxygenase component             |
| 4gam.1.B | 18.35 | homo-dimer    | -    | HHblits | X-ray | 2.90Å | 0.28 | 0.63 | Methane monooxygenase component A alpha chain        |
| 6f65.1.A | 13.66 | homo-dimer    | 0.02 | HHblits | X-ray | 1.95Å | 0.27 | 0.64 | Ribonucleotide reductase small subunit               |
| 1fz4.1.A | 18.35 | homo-dimer    | 0.16 | HHblits | X-ray | 2.38Å | 0.28 | 0.63 | METHANE MONOOXYGENASE COMPONENT A, ALPHA CHAIN       |
| 6ebo.1.A | 12.73 | homo-dimer    | 0.01 | HHblits | X-ray | 1.58Å | 0.25 | 0.66 | Ribonucleoside-diphosphate reductase, beta subunit   |
| 1mty.1.A | 18.99 | homo-dimer    | 0.08 | HHblits | X-ray | 1.70Å | 0.28 | 0.63 | METHANE MONOOXYGENASE HYDROXYLASE                    |
| 4n83.1.A | 12.05 | homo-dimer    | -    | HHblits | X-ray | 2.65Å | 0.25 | 0.66 | Ribonucleoside-diphosphate reductase subunit beta    |

The table above shows the top 50 filtered templates. A further 99 templates were found which were considered to be less suitable for modelling than the filtered list.

4n7r.1.A, 6f6h.1.A, 3n1y.1.A, 6qk1.1.A, 5x1e.1.B, 2o1z.1.A, 4bmr.2.A, 2ani.1.A, 2uw2.1.A, 1oxz.1.A, 1xsm.1.A, 4tod.1.A, 6gp3.1.A, 3rna.1.A, 4toh.1.B, 4bmp.1.A, 6f6i.1.A, 2bq1.1.D, 6gp2.1.A, 4djn.1.B, 1w68.1.A, 4bmq.1.A, 6qk0.1.B, 1jk0.1.A, 1mhy.1.A, 6tqx.1.A, 4hr5.1.A, 3oql.1.A, 6i92.1.A, 2inp.1.C, 3rnc.1.A, 5omj.1.A, 6qk0.1.A, 2bq1.1.C, 2inc.1.A, 1xmh.1.C, 5uxg.1.A, 3oij.1.A, 3hf1.1.B, 4tof.1.A, 6f6f.1.A, 5yjl.1.A, 1smq.1.A, 4gam.2.E, 1kgo.1.A, 3vpm.1.A, 3hf1.1.A, 5xnb.1.C, 3ee4.1.A, 6i93.1.A, 6f6c.1.A, 1syy.1.A, 6i90.1.A, 5yjl.1.B, 6qjv.1.A, 3qk9.1.B, 1nwm.1.A, 4m1h.1.B, 6cwq.1.A, 5x90.1.B, 3qk9.1.A, 4hr0.1.A, 1mmo.1.A, 5tdu.1.B, 1uzr.1.A, 2rdb.1.A, 2vux.1.A, 4d8f.1.B, 4bmo.1.A, 4djn.1.A, 1mhy.1.B, 4n7r.1.C, 6gp3.1.B, 4mud.1.A, 6ebp.1.A, 3vpn.1.A, 6qo5.1.A, 3ri7.1.B, 5che.1.B, 5x90.2.B, 5che.1.A, 3vpo.1.A, 3mjo.1.A, 6gp2.1.B, 1za0.1.A, 2p1i.4.A, 2r2f.1.A, 4bmq.2.A, 1sms.1.A, 1mty.1.C, 6d7k.1.B, 2p1i.1.A, 4iit.1.C, 1jk0.1.B, 1tuw.1.A, 6d9f.1.A, 3dhz.1.B, 3n39.1.A, 1fz4.1.C

# SWISS-MODEL Homology Modelling Report

## Model Building Report

This document lists the results for the homology modelling project "gene\_573135" submitted to SWISS-MODEL workspace on Jan. 23, 2020, 8:41 p.m.. The submitted primary amino acid sequence is given in Table T1.

If you use any results in your research, please cite the relevant publications:

- Waterhouse, A., Bertoni, M., Bienert, S., Studer, G., Tauriello, G., Gumienny, R., Heer, F.T., de Beer, T.A.P., Rempfer, C., Bordoli, L., Lepore, R., Schwede, T. SWISS-MODEL: homology modelling of protein structures and complexes. *Nucleic Acids Res.* 46(W1), W296-W303 (2018). [doi>](#)
- Guex, N., Peitsch, M.C., Schwede, T. Automated comparative protein structure modeling with SWISS-MODEL and Swiss-PdbViewer: A historical perspective. *Electrophoresis* 30, S162-S173 (2009). [doi>](#)
- Bienert, S., Waterhouse, A., de Beer, T.A.P., Tauriello, G., Studer, G., Bordoli, L., Schwede, T. The SWISS-MODEL Repository - new features and functionality. *Nucleic Acids Res.* 45, D313-D319 (2017). [doi>](#)
- Benkert, P., Biasini, M., Schwede, T. Toward the estimation of the absolute quality of individual protein structure models. *Bioinformatics* 27, 343-350 (2011). [doi>](#)
- Bertoni, M., Kiefer, F., Biasini, M., Bordoli, L., Schwede, T. Modeling protein quaternary structure of homo- and hetero-oligomers beyond binary interactions by homology. *Scientific Reports* 7 (2017). [doi>](#)

## Results

The SWISS-MODEL template library (SMTL version 2020-01-15, PDB release 2020-01-10) was searched with BLAST (Camacho et al.) and HHblits (Remmert et al.) for evolutionary related structures matching the target sequence in Table T1. For details on the template search, see Materials and Methods. Overall 478 templates were found (Table T2).

## Models

The following models were built (see Materials and Methods "Model Building"):

| Model #01                                                                         | File | Built with    | Oligo-State | Ligands | GMQE | QMEAN |
|-----------------------------------------------------------------------------------|------|---------------|-------------|---------|------|-------|
|  | PDB  | ProMod3 2.0.0 | monomer     | None    | 0.51 | -3.88 |

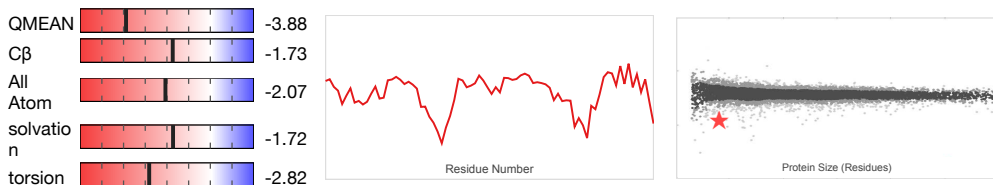

| Template | Seq Identity | Oligo-state | QSQE | Found by | Method | Resolution | Seq Similarity | Range  | Coverage | Description          |
|----------|--------------|-------------|------|----------|--------|------------|----------------|--------|----------|----------------------|
| 1bwe.1.A | 36.49        | monomer     | 0.00 | HHblits  | NMR    | -          | 0.41           | 4 - 83 | 0.70     | PROTEIN (FERREDOXIN) |

### Excluded ligands

| Ligand Name.Number | Reason for Exclusion | Description |
|--------------------|----------------------|-------------|
|                    |                      |             |

|       |                             |                     |
|-------|-----------------------------|---------------------|
| SF4.1 | Binding site not conserved. | IRON/SULFUR CLUSTER |
| SF4.2 | Binding site not conserved. | IRON/SULFUR CLUSTER |

Target VSVKILLEPCIN--CGLCRKACPTETIHFFTTQHRTHVVEPAGCIDCDICVPIKPEKCIHDDDDYVHEPSELAALKVRAR  
1bwe.1.A ---YVITEPCIGTKASCVEVCPVDCIHEGEDQ---YYIDPDVDCIDCGACEAVCPVSAIYHEDFV---PEEWKSIQKNR

Target DWAKRQNVLRQVRKDRAAAAMAVRRGA  
1bwe.1.A DFFKK-----

| Model #03                                                                           | File | Built with    | Oligo-State | Ligands | GMQE | QMEAN |
|-------------------------------------------------------------------------------------|------|---------------|-------------|---------|------|-------|
|  | PDB  | ProMod3 2.0.0 | monomer     | None    | 0.45 | -4.10 |

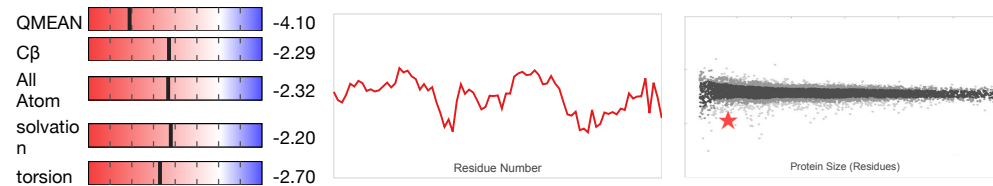

| Template | Seq Identity | Oligo-state | QSQE | Found by | Method | Resolution | Seq Similarity | Range  | Coverage | Description                        |
|----------|--------------|-------------|------|----------|--------|------------|----------------|--------|----------|------------------------------------|
| 2c42.1.B | 26.32        | monomer     | 0.00 | HHblits  | X-ray  | 1.78Å      | 0.33           | 3 - 83 | 0.72     | PYRUVATE-FERREDOXIN OXIDOREDUCTASE |

### Excluded ligands

| Ligand Name.Number | Reason for Exclusion        | Description          |
|--------------------|-----------------------------|----------------------|
| CA.7               | Binding site not conserved. | CALCIUM ION          |
| CA.14              | Binding site not conserved. | CALCIUM ION          |
| MG.6               | Binding site not conserved. | MAGNESIUM ION        |
| MG.13              | Binding site not conserved. | MAGNESIUM ION        |
| PYR.5              | Binding site not conserved. | PYRUVIC ACID         |
| PYR.12             | Binding site not conserved. | PYRUVIC ACID         |
| SF4.1              | Binding site not conserved. | IRON/SULFUR CLUSTER  |
| SF4.2              | Binding site not conserved. | IRON/SULFUR CLUSTER  |
| SF4.3              | Binding site not conserved. | IRON/SULFUR CLUSTER  |
| SF4.8              | Binding site not conserved. | IRON/SULFUR CLUSTER  |
| SF4.9              | Binding site not conserved. | IRON/SULFUR CLUSTER  |
| SF4.10             | Binding site not conserved. | IRON/SULFUR CLUSTER  |
| TPP.4              | Binding site not conserved. | THIAMINE DIPHOSPHATE |
| TPP.11             | Binding site not conserved. | THIAMINE DIPHOSPHATE |

Target VSVKILLEPCINGLCRKACPTETIHFF---T-----TQHRTHVVEPAGCIDCDICVPIKPE--



2c42.1.B --PQWVPENCIQNCQAFVCPHSAILPVLAKEEELVGAPANFTALEAKGKELKGYKFRIQINTLDCMCGNCADICPPKE

Target KCI VHDDDDVHEPSELA AAKVRARDWAKRQNVLRQVRKDRAAAAMAVRRGA  
 2c42.1.B KALVMQPLD-----TQRDAQVPNLEYAAR-----

| Model #02                                                                        | File | Built with    | Oligo-State | Ligands | GMQE | QMEAN |
|----------------------------------------------------------------------------------|------|---------------|-------------|---------|------|-------|
|  | PDB  | ProMod3 2.0.0 | monomer     | None    | 0.44 | -3.44 |

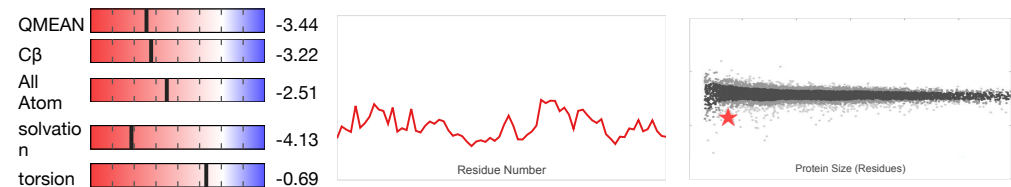

| Template | Seq Identity | Oligo-state | QSQE | Found by | Method | Resolution | Seq Similarity | Range  | Coverage | Description  |
|----------|--------------|-------------|------|----------|--------|------------|----------------|--------|----------|--------------|
| 2vpz.1.B | 30.77        | monomer     | 0.00 | HHblits  | X-ray  | 2.40Å      | 0.35           | 3 - 74 | 0.61     | NRFC PROTEIN |

**Excluded ligands**

| Ligand Name.Number | Reason for Exclusion        | Description                                                                                                        |
|--------------------|-----------------------------|--------------------------------------------------------------------------------------------------------------------|
| MGD.2              | Binding site not conserved. | 2-AMINO-5,6-DIMERCAPTO-7-METHYL-3,7,8A,9-TETRAHYDRO-8-OXA-1,3,9,10-TETRAAZA-ANTHRACEN-4-ONE GUANOSINE DINUCLEOTIDE |
| MGD.3              | Binding site not conserved. | 2-AMINO-5,6-DIMERCAPTO-7-METHYL-3,7,8A,9-TETRAHYDRO-8-OXA-1,3,9,10-TETRAAZA-ANTHRACEN-4-ONE GUANOSINE DINUCLEOTIDE |
| MGD.10             | Binding site not conserved. | 2-AMINO-5,6-DIMERCAPTO-7-METHYL-3,7,8A,9-TETRAHYDRO-8-OXA-1,3,9,10-TETRAAZA-ANTHRACEN-4-ONE GUANOSINE DINUCLEOTIDE |
| MGD.11             | Binding site not conserved. | 2-AMINO-5,6-DIMERCAPTO-7-METHYL-3,7,8A,9-TETRAHYDRO-8-OXA-1,3,9,10-TETRAAZA-ANTHRACEN-4-ONE GUANOSINE DINUCLEOTIDE |
| MO.4               | Not in contact with model.  | MOLYBDENUM ATOM                                                                                                    |
| MO.12              | Not in contact with model.  | MOLYBDENUM ATOM                                                                                                    |
| SF4.1              | Binding site not conserved. | IRON/SULFUR CLUSTER                                                                                                |
| SF4.5              | Binding site not conserved. | IRON/SULFUR CLUSTER                                                                                                |
| SF4.6              | Binding site not conserved. | IRON/SULFUR CLUSTER                                                                                                |
| SF4.7              | Binding site not conserved. | IRON/SULFUR CLUSTER                                                                                                |
| SF4.8              | Binding site not conserved. | IRON/SULFUR CLUSTER                                                                                                |

|        |                             |                     |
|--------|-----------------------------|---------------------|
| SF4.9  | Binding site not conserved. | IRON/SULFUR CLUSTER |
| SF4.13 | Binding site not conserved. | IRON/SULFUR CLUSTER |
| SF4.14 | Binding site not conserved. | IRON/SULFUR CLUSTER |
| SF4.15 | Binding site not conserved. | IRON/SULFUR CLUSTER |
| SF4.16 | Binding site not conserved. | IRON/SULFUR CLUSTER |

Target VSVKILLEPCINCLCRKACPTETIHFFTTQHRTHVVEPAGCIDCD-----ICVPI CPEKCI VHDDDDVHEPSELA  
 2vpz.1.B --VLVDPKCCIACGACIAACPYDARYLHPA-----GYVSKCTFCAHRLKGGKVPACVETCTPT YCRTFGLEDLP-ESPVA

Target AAKVRARDWAKRQNVLRQVRKDRAAAAMAVRRGA  
 2vpz.1.B KAL-----

| Model #04                                                                           | File | Built with    | Oligo-State | Ligands | GMQE | QMEAN |
|-------------------------------------------------------------------------------------|------|---------------|-------------|---------|------|-------|
|  | PDB  | ProMod3 2.0.0 | monomer     | None    | 0.43 | -2.10 |

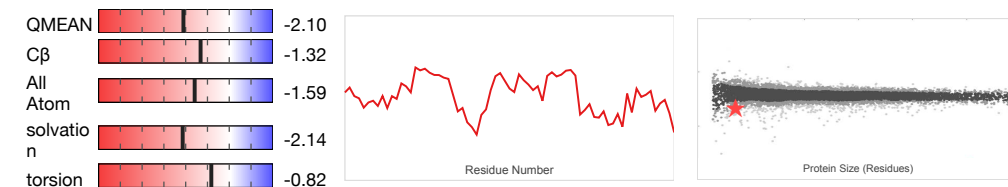

| Template | Seq Identity | Oligo-state | QSQE | Found by | Method | Resolution | Seq Similarity | Range  | Coverage | Description                                  |
|----------|--------------|-------------|------|----------|--------|------------|----------------|--------|----------|----------------------------------------------|
| 2zvs.1.A | 27.94        | monomer     | 0.00 | HHblits  | X-ray  | 1.65Å      | 0.36           | 4 - 74 | 0.64     | Uncharacterized ferredoxin-like protein yfhL |

**Excluded ligands**

| Ligand Name.Number | Reason for Exclusion        | Description         |
|--------------------|-----------------------------|---------------------|
| SF4.1              | Binding site not conserved. | IRON/SULFUR CLUSTER |
| SF4.2              | Binding site not conserved. | IRON/SULFUR CLUSTER |

Target VSVKILLEPCINCLCRKACPTETIHFFTTQHRTHVVEPAGCIDCD-----ICVPI CPE-KCI VHDDDDVHEPSELA A  
 2zvs.1.A ---LLITKICINCDMCEPECN EATSMGDHI---YEINSDKTECVGHYETPTCQKVCPI PNTIVKDP AHVETEQLWDK

Target KVRARDWAKRQNVLRQVRKDRAAAAMAVRRGA  
 2zvs.1.A F-----



| Model #05                                                                        | File | Built with    | Oligo-State | Ligands | GMQE | QMEAN |
|----------------------------------------------------------------------------------|------|---------------|-------------|---------|------|-------|
|  | PDB  | ProMod3 2.0.0 | monomer     | None    | 0.38 | -2.89 |

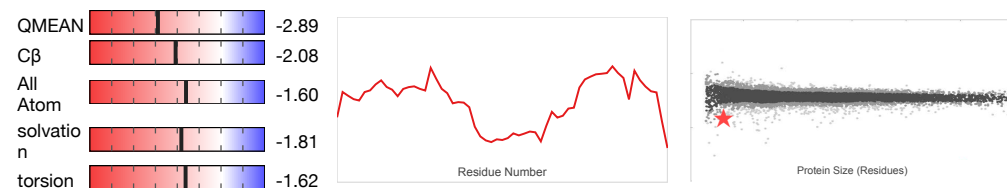

| Template | Seq Identity | Oligo-state | QSQE | Found by | Method | Resolution | Seq Similarity | Range  | Coverage | Description        |
|----------|--------------|-------------|------|----------|--------|------------|----------------|--------|----------|--------------------|
| 6gm0.1.A | 21.31        | monomer     | 0.00 | HHblits  | X-ray  | 2.11Å      | 0.34           | 2 - 62 | 0.58     | Iron hydrogenase 1 |

#### Excluded ligands

| Ligand Name.Number | Reason for Exclusion        | Description                                                                                                 |
|--------------------|-----------------------------|-------------------------------------------------------------------------------------------------------------|
| 402.1              | Binding site not conserved. | dicarbonyl[bis(cyanide-kappaC)]-mu-(iminodimethanethiolatato-1kappaS:2kappaS)-mu-(oxomethylidene)diiron(2+) |
| FES.6              | Binding site not conserved. | FE2/S2 (INORGANIC) CLUSTER                                                                                  |
| MG.7               | Not in contact with model.  | MAGNESIUM ION                                                                                               |
| SF4.2              | Binding site not conserved. | IRON/SULFUR CLUSTER                                                                                         |
| SF4.3              | Binding site not conserved. | IRON/SULFUR CLUSTER                                                                                         |
| SF4.4              | Binding site not conserved. | IRON/SULFUR CLUSTER                                                                                         |
| SF4.5              | Binding site not conserved. | IRON/SULFUR CLUSTER                                                                                         |

Target VSVKILLEPCINCLCRKACPT---ETIHFFTTQHR-----THVVEPAGCIDCDICVPI CPEKCI VHDDDYVHEPSE  
6gm0.1.A -SLTVDRTKCLLCGRVCNACGKNTETYAMKFLNKNKGTII GAEDKCFDDTNCLLCGQCIIACPAALSEKSH-----

Target LAAAKVRARDWAKRQNVLRQVRKDRAAAAVMVRRGA  
6gm0.1.A -----

## Materials and Methods

## Template Search

Template search with BLAST and HHblits has been performed against the SWISS-MODEL template library (SMTL, last update: 2020-01-15, last included PDB release: 2020-01-10).

The target sequence was searched with BLAST against the primary amino acid sequence contained in the SMTL.

An initial HHblits profile has been built using the procedure outlined in (Remmert et al.), followed by 1 iteration of HHblits against NR20. The obtained profile has then been searched against all profiles of the SMTL. A total of 487 templates were found.

## Template Selection

For each identified template, the template's quality has been predicted from features of the target-template alignment. The templates with the highest quality have then been selected for model building.

## Model Building

Models are built based on the target-template alignment using ProMod3. Coordinates which are conserved between the target and the template are copied from the template to the model. Insertions and deletions are remodelled using a fragment library. Side chains are then rebuilt. Finally, the geometry of the resulting model is regularized by using a force field. In case loop modelling with ProMod3 fails, an alternative model is built with PROMOD-II (Guex et al.).

## Model Quality Estimation

The global and per-residue model quality has been assessed using the QMEAN scoring function (Benkert et al.). For improved performance, weights of the individual QMEAN terms have been trained specifically for SWISS-MODEL.

## Ligand Modelling

Ligands present in the template structure are transferred by homology to the model when the following criteria are met: (a) The ligands are annotated as biologically relevant in the template library, (b) the ligand is in contact with the model, (c) the ligand is not clashing with the protein, (d) the residues in contact with the ligand are conserved between the target and the template. If any of these four criteria is not satisfied, a certain ligand will not be included in the model. The model summary includes information on why and which ligand has not been included.

## Oligomeric State Conservation

The quaternary structure annotation of the template is used to model the target sequence in its oligomeric form. The method (Bertoni et al.) is based on a supervised machine learning algorithm, Support Vector Machines (SVM), which combines interface conservation, structural clustering, and other template features to provide a quaternary structure quality estimate (QSQE). The QSQE score is a number between 0 and 1, reflecting the expected accuracy of the interchain contacts for a model built based a given alignment and template. Higher numbers indicate higher reliability. This complements the GMQE score which estimates the accuracy of the tertiary structure of the resulting model.

## References

- **BLAST**  
Camacho, C., Coulouris, G., Avagyan, V., Ma, N., Papadopoulos, J., Bealer, K., Madden, T.L. BLAST+: architecture and applications. BMC Bioinformatics 10, 421-430 (2009). [M](#) [doi>](#)
- **HHblits**  
Remmert, M., Biegert, A., Hauser, A., Söding, J. HHblits: lightning-fast iterative protein sequence searching by HMM-HMM alignment. Nat Methods 9, 173-175 (2012). [M](#) [doi>](#)

## Table T1:

Primary amino acid sequence for which templates were searched and models were built.

VSVKILLEPCINCLCRKACPTETIHFFTTQHRTHVVEPAGCIDCDICVPI CPEKCI VHDDDYVHEPSELAAAKVRARDWAKRQNVLRQVRKDRAAAAVM  
AVRRGA

**Table T2:**

| Template  | Seq Identity | Oligo-state | QSQE | Found by | Method | Resolution | Seq Similarity | Coverage | Description                                            |
|-----------|--------------|-------------|------|----------|--------|------------|----------------|----------|--------------------------------------------------------|
| 1bwe.1.A  | 36.49        | monomer     | -    | HHblits  | NMR    | NA         | 0.41           | 0.70     | PROTEIN (FERREDOXIN)                                   |
| 1bqx.1.A  | 36.49        | monomer     | -    | HHblits  | NMR    | NA         | 0.41           | 0.70     | PROTEIN (FERREDOXIN)                                   |
| 1bd6.1.A  | 35.14        | monomer     | -    | HHblits  | NMR    | NA         | 0.40           | 0.70     | 7-FE FERREDOXIN                                        |
| 1bc6.1.A  | 35.14        | monomer     | -    | HHblits  | NMR    | NA         | 0.40           | 0.70     | 7-FE FERREDOXIN                                        |
| 1h98.1.A  | 33.33        | monomer     | -    | HHblits  | X-ray  | 1.64Å      | 0.38           | 0.71     | FERREDOXIN                                             |
| 2v2k.1.A  | 25.97        | monomer     | -    | HHblits  | X-ray  | 1.60Å      | 0.37           | 0.73     | FERREDOXIN                                             |
| 1kek.1.A  | 26.32        | monomer     | -    | HHblits  | X-ray  | 1.90Å      | 0.33           | 0.72     | Pyruvate-Ferredoxin Oxidoreductase                     |
| 2c42.1.B  | 26.32        | monomer     | -    | HHblits  | X-ray  | 1.78Å      | 0.33           | 0.72     | PYRUVATE-FERREDOXIN OXIDOREDUCTASE                     |
| 3exy.1.A  | 34.33        | monomer     | -    | HHblits  | X-ray  | 1.48Å      | 0.39           | 0.63     | Ferredoxin                                             |
| 2vpz.1.B  | 30.77        | monomer     | -    | HHblits  | X-ray  | 2.40Å      | 0.35           | 0.61     | NRFC PROTEIN                                           |
| 2fgo.1.A  | 30.88        | monomer     | -    | HHblits  | X-ray  | 1.32Å      | 0.37           | 0.64     | Ferredoxin                                             |
| 1rgv.1.A  | 29.41        | monomer     | -    | HHblits  | X-ray  | 2.90Å      | 0.36           | 0.64     | ferredoxin                                             |
| 6ciq.2.B  | 25.33        | monomer     | -    | HHblits  | X-ray  | 3.30Å      | 0.34           | 0.71     | PYRUVATE-FERREDOXIN OXIDOREDUCTASE                     |
| 6cin.1.A  | 25.33        | monomer     | -    | HHblits  | X-ray  | 2.60Å      | 0.34           | 0.71     | PYRUVATE-FERREDOXIN OXIDOREDUCTASE                     |
| 1blu.1.A  | 34.33        | monomer     | -    | HHblits  | X-ray  | 2.10Å      | 0.40           | 0.63     | FERREDOXIN                                             |
| 1h7x.1.A  | 30.65        | monomer     | -    | HHblits  | X-ray  | 2.01Å      | 0.35           | 0.58     | DIHYDROPYRIMIDINE DEHYDROGENASE                        |
| 5gpn.27.A | 28.33        | monomer     | -    | HHblits  | EM     | NA         | 0.35           | 0.57     | NADH dehydrogenase [ubi-quinone] iron-sulfur protein 8 |
| 3eun.1.A  | 33.33        | monomer     | -    | HHblits  | X-ray  | 1.05Å      | 0.39           | 0.62     | Ferredoxin                                             |
| 1h7w.2.A  | 31.15        | monomer     | -    | HHblits  | X-ray  | 1.90Å      | 0.36           | 0.58     | DIHYDROPYRIMIDINE DEHYDROGENASE                        |
| 1gth.1.A  | 31.15        | monomer     | -    | HHblits  | X-ray  | 2.25Å      | 0.36           | 0.58     | DIHYDROPYRIMIDINE DEHYDROGENASE                        |
| 1gt8.1.A  | 31.15        | monomer     | -    | HHblits  | X-ray  | 3.30Å      | 0.36           | 0.58     | DIHYDROPYRIMIDINE DEHYDROGENASE                        |
| 2zvs.2.A  | 27.94        | monomer     | -    | HHblits  | X-ray  | 1.65Å      | 0.36           | 0.64     | Uncharacterized ferredoxin-like protein yfhL           |
| 2zvs.3.A  | 27.94        | monomer     | -    | HHblits  | X-ray  | 1.65Å      | 0.36           | 0.64     | Uncharacterized ferredoxin-like protein yfhL           |
| 2zvs.1.A  | 27.94        | monomer     | -    | HHblits  | X-ray  | 1.65Å      | 0.36           | 0.64     | Uncharacterized ferredoxin-like protein yfhL           |
| 1xer.1.A  | 30.00        | homo-dimer  | -    | HHblits  | X-ray  | 2.00Å      | 0.36           | 0.57     | FERREDOXIN                                             |
| 1frm.1.A  | 30.00        | monomer     | -    | HHblits  | X-ray  | 2.30Å      | 0.38           | 0.57     | FERREDOXIN                                             |
| 1ftc.1.A  | 30.51        | monomer     | -    | HHblits  | X-ray  | 2.35Å      | 0.38           | 0.56     | FERREDOXIN                                             |
| 1fdd.1.A  | 30.51        | monomer     | -    | HHblits  | X-ray  | 1.90Å      | 0.38           | 0.56     | FERREDOXIN                                             |
| 6cfw.1.N  | 20.97        | monomer     | -    | HHblits  | EM     | 3.70Å      | 0.35           | 0.58     | NADH-plastoquinone oxidoreductase subunit              |
| 1b0t.1.A  | 30.51        | monomer     | -    | HHblits  | X-ray  | 2.10Å      | 0.39           | 0.56     | PROTEIN (FERREDOXIN I)                                 |
| 1fri.1.A  | 30.51        | monomer     | -    | HHblits  | X-ray  | 2.30Å      | 0.39           | 0.56     | FERREDOXIN                                             |
| 1d3w.1.A  | 30.51        | monomer     | -    | HHblits  | X-ray  | 1.70Å      | 0.38           | 0.56     | FERREDOXIN 1                                           |

|          |       |         |   |         |       |       |      |      |                                                        |
|----------|-------|---------|---|---------|-------|-------|------|------|--------------------------------------------------------|
| 1a6l.1.A | 30.00 | monomer | - | HHblits | X-ray | 2.10Å | 0.38 | 0.57 | FERREDOXIN                                             |
| 2fja.1.D | 24.59 | monomer | - | HHblits | X-ray | 2.00Å | 0.33 | 0.58 | adenylylsulfate reductase, sub-unit B                  |
| 2vkr.1.A | 28.81 | monomer | - | HHblits | X-ray | 2.01Å | 0.36 | 0.56 | ZINC-CONTAINING FERREDOXIN                             |
| 6cz7.1.B | 27.42 | monomer | - | HHblits | X-ray | 1.62Å | 0.33 | 0.58 | 4Fe-4S ferredoxin, iron-sulfur binding domain protein  |
| 6gm0.1.A | 21.31 | monomer | - | HHblits | X-ray | 2.11Å | 0.34 | 0.58 | Iron hydrogenase 1                                     |
| 6gm2.2.A | 21.31 | monomer | - | HHblits | X-ray | 2.76Å | 0.34 | 0.58 | Iron hydrogenase 1                                     |
| 6gm2.1.A | 21.31 | monomer | - | HHblits | X-ray | 2.76Å | 0.34 | 0.58 | Iron hydrogenase 1                                     |
| 6hum.1.J | 24.59 | monomer | - | HHblits | EM    | NA    | 0.36 | 0.58 | NAD(P)H-quinone oxidoreductase subunit I               |
| 6nbq.1.D | 24.59 | monomer | - | HHblits | EM    | NA    | 0.36 | 0.58 | NAD(P)H-quinone oxidoreductase subunit I               |
| 3lw5.1.C | 21.31 | monomer | - | HHblits | X-ray | 3.30Å | 0.33 | 0.58 | Photosystem I iron-sulfur center                       |
| 4y28.1.H | 21.31 | monomer | - | HHblits | X-ray | 2.80Å | 0.33 | 0.58 | Photosystem I iron-sulfur center                       |
| 1y4z.1.B | 20.31 | monomer | - | HHblits | X-ray | 2.00Å | 0.30 | 0.60 | Respiratory nitrate reductase 1 beta chain             |
| 1jnz.1.B | 24.59 | monomer | - | HHblits | X-ray | 2.50Å | 0.33 | 0.58 | adenylylsulfate reductase                              |
| 4rku.1.C | 20.97 | monomer | - | HHblits | X-ray | 3.00Å | 0.32 | 0.58 | Photosystem I iron-sulfur center                       |
| 2o01.1.C | 20.97 | monomer | - | HHblits | X-ray | 3.40Å | 0.32 | 0.58 | Photosystem I iron-sulfur center                       |
| 5t5i.1.F | 27.87 | monomer | - | HHblits | X-ray | 1.90Å | 0.34 | 0.58 | Tungsten formylmethanofuran dehydrogenase subunit fwdG |
| 6igz.1.C | 21.31 | monomer | - | HHblits | EM    | NA    | 0.33 | 0.58 | PsaC                                                   |
| 1frk.1.A | 30.51 | monomer | - | HHblits | X-ray | 2.10Å | 0.39 | 0.56 | FERREDOXIN                                             |

The table above shows the top 50 filtered templates. A further 245 templates were found which were considered to be less suitable for modelling than the filtered list.

1fxr.1.B, 5lnk.1.C, 1fxr.1.A, 5lnk.1.G, 2gmh.1.A, 1frl.1.A, 4wz7.1.G, 1bc6.1.A, 1fdn.1.A, 4ytp.1.B, 5ldw.1.G, 1siw.1.B, 1gt8.1.A, 2fgo.1.A, 1rof.1.A, 5la3.1.A, 6gly.1.A, 6gcs.1.I, 1bd6.1.A, 6glz.1.A, 6g2j.1.I, 3mmc.1.A, 3mmc.1.B, 3exy.1.A, 2vpz.1.B, 6g2j.1.G, 6gm3.1.A, 5xmj.1.E, 6kmw.1.C, 1h98.1.A, 1l0v.1.B, 6hqb.1.C, 6h8k.7.A, 2c42.1.B, 6nbq.1.D, 3gyx.1.B, 2z8q.1.A, 4ydd.1.B, 6hum.1.J, 1hfe.1.B, 5zji.1.G, 1pc4.1.A, 1g6b.1.A, 1d3w.1.A, 1ff2.1.A, 5odh.1.A, 3eun.1.A, 5xmj.2.B, 5odh.1.G, 1kek.1.A, 5t61.1.X, 6ijj.1.C, 6pfy.1.C, 4qjv.2.A, 3gyx.3.B, 6igz.1.C, 4qjv.1.A, 3gyx.5.B, 6gcs.1.A, 6qc5.1.C, 5xwd.1.A, 5odc.1.C, 5ma1.1.A, 5zgb.1.C, 1k8v.1.A, 2zvs.2.A, 5xtb.1.L, 1e08.1.A, 4qjv.2.D, 6hcm.35.A, 3p4r.2.B, 6gly.2.A, 1blu.1.A, 3gyx.6.B, 5xtb.1.B, 5lc5.1.G, 3m9s.1.C, 3m9s.1.G, 1dax.1.A, 1frj.1.A, 1gth.1.A, 6gm0.1.A, 4id8.1.A, 5m2g.1.A, 4hea.1.G, 2vkr.1.A, 1pc5.1.A, 6qgr.1.A, 3or1.1.A, 3or1.1.B, 1fd2.1.A, 4xdd.1.A, 6jeo.1.O, 1qlb.1.B, 3bk7.1.A, 3j15.1.B, 1h7w.2.A, 1h0h.1.B, 2o01.1.C, 4fe1.1.C, 4xdd.2.A, 1siz.1.A, 5u8q.1.A, 2fug.2.C, 6cfw.1.N, 4kro.1.A, 4rku.1.C, 1fxd.1.A, 2z8q.2.A, 1bwe.1.A, 1wtf.1.A, 4ras.1.A, 1gao.1.A, 1frx.1.A, 5lzv.79.A, 6cz7.1.B, 4p6v.1.A, 1rgv.1.A, 1g3o.1.A, 6gm2.1.A, 4omf.1.D, 3gyx.4.B, 2ivf.1.B, 3sfd.1.B, 1dur.1.A, 6f0k.1.B, 4ayb.1.D, 6ciq.2.B, 3vr8.1.B, 1f5b.1.A, 4krp.1.A, 5t5i.1.E, 5t5i.1.F, 5xf9.1.B, 1dfd.1.A, 1kqf.1.B, 5t5i.1.K, 2fja.1.D, 1a6l.1.A, 2pa8.1.A, 5u8r.1.D, 1clf.1.A, 1fdd.1.A, 1vjw.1.A, 1y4z.1.B, 1xer.1.A, 1k0t.1.A, 6gm1.1.A, 1dwl.1.A, 1frh.1.A, 6fah.1.E, 5c4i.1.E, 5o31.1.8, 2zvs.1.A, 5odh.1.I, 5d6s.1.A, 3qwq.1.A, 6gm3.2.A, 5ll6.1.T, 4crm.1.A, 1frm.1.A, 2v4j.1.B, 2v4j.1.A, 2b76.2.B, 5exe.1.B, 4ysz.1.B, 2fd2.1.A, 6fah.1.A, 3p4q.2.B, 5exe.1.E, 1f5c.1.A, 1feh.1.A, 5odc.1.A, 2vkr.6.A, 1fca.1.A, 6gm8.1.A, 6btm.1.B, 1frk.1.A, 5d08.1.A, 5t5m.1.E, 5byr.1.A, 3jag.79.A, 2vkr.4.A, 3j16.1.B, 6gm4.1.A, 3egw.1.B, 5lw7.1.A, 1b0v.1.A, 2fbw.1.B, 2xsj.1.A, 4y28.1.H, 1jnz.1.B, 6qii.1.A, 2pmz.2.D, 3abv.1.B, 1h7x.1.A, 2wb1.1.D, 4wz7.1.M, 2bs2.1.B, 1b0t.1.A, 6qcf.1.G, 5gpn.27.A, 6gm1.2.A, 1gx7.1.A, 6qcf.1.C, 6gm2.2.A, 1f2g.1.A, 6h8k.13.A, 4dhv.1.B, 4dhv.1.A, 5xmj.2.E, 3cf4.1.A, 5oef.2.A, 6cin.1.A, 1igr.1.A, 5t8y.2.A, 4v4c.1.B, 1axq.1.A, 5ldx.1.I, 3or2.1.B, 3or2.1.A, 2wp9.1.B, 6fos.1.F, 4z3w.1.E, 5ldx.1.G, 4z3w.1.F, 1y5n.2.E, 1fri.1.A, 4ci0.1.B, 6frf.1.A, 5dqr.1.A, 3p4s.2.B, 2v2k.1.A, 6frf.1.I, 4kt0.1.C, 2xsj.1.B, 2acz.1.B, 1bqx.1.A, 2zvs.3.A, 1ftc.1.A, 6rfq.1.I, 3lw5.1.C, 5gpn.24.A, 5xmj.1.B, 6rfq.1.A

# SWISS-MODEL Homology Modelling Report

## Model Building Report

This document lists the results for the homology modelling project "gene\_573134" submitted to SWISS-MODEL workspace on Jan. 23, 2020, 8:40 p.m.. The submitted primary amino acid sequence is given in Table T1.

If you use any results in your research, please cite the relevant publications:

- Waterhouse, A., Bertoni, M., Bienert, S., Studer, G., Tauriello, G., Gumienny, R., Heer, F.T., de Beer, T.A.P., Rempfer, C., Bordoli, L., Lepore, R., Schwede, T. SWISS-MODEL: homology modelling of protein structures and complexes. *Nucleic Acids Res.* 46(W1), W296-W303 (2018). [doi>](#)
- Guex, N., Peitsch, M.C., Schwede, T. Automated comparative protein structure modeling with SWISS-MODEL and Swiss-PdbViewer: A historical perspective. *Electrophoresis* 30, S162-S173 (2009). [doi>](#)
- Bienert, S., Waterhouse, A., de Beer, T.A.P., Tauriello, G., Studer, G., Bordoli, L., Schwede, T. The SWISS-MODEL Repository - new features and functionality. *Nucleic Acids Res.* 45, D313-D319 (2017). [doi>](#)
- Benkert, P., Biasini, M., Schwede, T. Toward the estimation of the absolute quality of individual protein structure models. *Bioinformatics* 27, 343-350 (2011). [doi>](#)
- Bertoni, M., Kiefer, F., Biasini, M., Bordoli, L., Schwede, T. Modeling protein quaternary structure of homo- and hetero-oligomers beyond binary interactions by homology. *Scientific Reports* 7 (2017). [doi>](#)

## Results

The SWISS-MODEL template library (SMTL version 2020-01-15, PDB release 2020-01-10) was searched with BLAST (Camacho et al.) and HHblits (Remmert et al.) for evolutionary related structures matching the target sequence in Table T1. For details on the template search, see Materials and Methods. Overall 43 templates were found (Table T2).

## Models

The following models were built (see Materials and Methods "Model Building"):

| Model #01                                                                         | File | Built with    | Oligo-State | Ligands | GMQE | QMEAN |
|-----------------------------------------------------------------------------------|------|---------------|-------------|---------|------|-------|
|  | PDB  | ProMod3 2.0.0 | monomer     | None    | 0.41 | -3.70 |

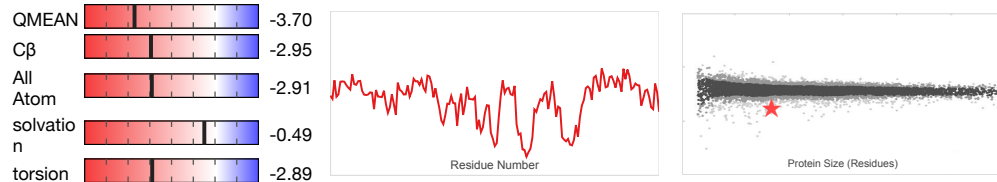

| Template | Seq Identity | Oligo-state | QSQE | Found by | Method | Resolution | Seq Similarity | Range    | Coverage | Description                               |
|----------|--------------|-------------|------|----------|--------|------------|----------------|----------|----------|-------------------------------------------|
| 4ii4.1.A | 17.12        | monomer     | 0.00 | HHblits  | X-ray  | 2.80Å      | 0.28           | 19 - 185 | 0.71     | 1,2-phenylacetyl-CoA epoxidase, subunit A |

## Excluded ligands

| Ligand Name.Number | Reason for Exclusion | Description |
|--------------------|----------------------|-------------|
|                    |                      |             |

|       |                             |                    |
|-------|-----------------------------|--------------------|
| BYC.1 | Binding site not conserved. | benzoyl coenzyme A |
| BYC.2 | Binding site not conserved. | benzoyl coenzyme A |

Target MPALALDPRITGGAFVSDCARRIINRYFAENVCMTEGGWASSTPSIKVKFALGEHCYHDSIHSFWLGQRLPELRQ--T  
4ii4.1.A -----TLIRQIGQHAHSEIVGMLPQGNWITRAPTLRRKAILLAQVQDEAGHGLYLYSAAETLGCARE

Target EKMD---YESPPTFRSTSYLAEPNEAFLKFCETMQLQTDQLLRVVGLYRVLKTHLAVYYRHHIQVTDQVSDAPSVRLNH  
4ii4.1.A DIYQKMLDGR-MKYSSI-F-NYPTLS---WADIGVIG-----WLVDGAAIVNQVALC-----RTSYGYPARAMVK

Target VLLEEQHLKQWQAMYEELAD-TPERRRAALSWQMELEDLLVKSQGGVTGGR  
4ii4.1.A ICKEESFHRQRFACMALAQGSEAQKQMLQ-----

| Model #04                                                                           | File | Built with    | Oligo-State | Ligands | GMQE | QMEAN |
|-------------------------------------------------------------------------------------|------|---------------|-------------|---------|------|-------|
|  | PDB  | ProMod3 2.0.0 | monomer     | None    | 0.36 | -4.69 |

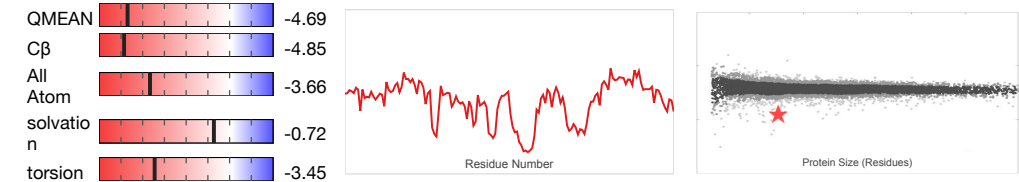

| Template | Seq Identity | Oligo-state | QSQE | Found by | Method | Resolution | Seq Similarity | Range    | Coverage | Description                                |
|----------|--------------|-------------|------|----------|--------|------------|----------------|----------|----------|--------------------------------------------|
| 3pvt.1.B | 17.91        | monomer     | 0.00 | HHblits  | X-ray  | 2.03Å      | 0.29           | 34 - 185 | 0.65     | Phenylacetic acid degradation protein paaC |

## Excluded ligands

| Ligand Name.Number | Reason for Exclusion        | Description                  |
|--------------------|-----------------------------|------------------------------|
| 3HC.1              | Binding site not conserved. | 3-HYDROXYBUTANOYL-COENZYME A |
| 3HC.6              | Binding site not conserved. | 3-HYDROXYBUTANOYL-COENZYME A |
| GOL.2              | Not biologically relevant.  | GLYCEROL                     |
| GOL.3              | Not biologically relevant.  | GLYCEROL                     |
| GOL.4              | Not biologically relevant.  | GLYCEROL                     |
| GOL.5              | Not biologically relevant.  | GLYCEROL                     |
| GOL.7              | Not biologically relevant.  | GLYCEROL                     |
| GOL.8              | Not biologically relevant.  | GLYCEROL                     |
| GOL.9              | Not biologically relevant.  | GLYCEROL                     |
| GOL.10             | Not biologically relevant.  | GLYCEROL                     |

Target MPALALDPRITGGAFVSDCARRIINRYFAENVCMTEGGWASSTPSIKVKFALGEHCYHDSIHSFWLGQRLPELR---Q  
3pvt.1.B -----LSQRLGEWCGHAPAELEIDLALANIGLDDLQARNFLSYAAELAGEGD

Target TEKMDYESPP--TFRTSYLAEPPEAFKFCETMQLQTDQLLRVVGLYRVLKTHLAVYYRHHIQVTDQVSDAPSVRILNHV  
 3pvt.1.B EDTLAFTRDERQFSNLLLVEQPNGNFA---DTIAR---QY-----FIDAWHVALFTRLM-----ESRDPQLAAISAKA

Target LLEEEQHLKWGQAMYEEELAD--TPERRRAALSWQMELEDLLVKSGGVTTGGR  
 3pvt.1.B IKEARYHLRFSRGLERLGNLTDVSGQKMQ-----

| Model #05                                                                        | File | Built with    | Oligo-State                   | Ligands | GMQE | QMEAN |
|----------------------------------------------------------------------------------|------|---------------|-------------------------------|---------|------|-------|
|  | PDB  | ProMod3 2.0.0 | monomer (matching prediction) | None    | 0.36 | -4.03 |

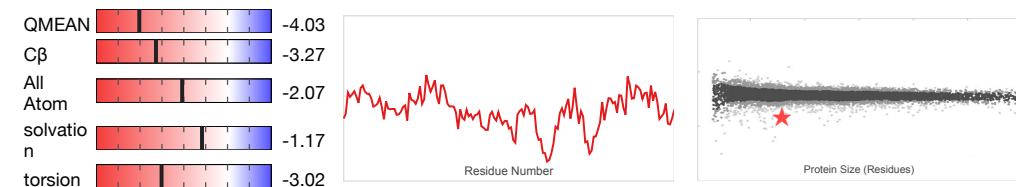

| Template | Seq Identity | Oligo-state | QSQE | Found by | Method | Resolution | Seq Similarity | Range    | Coverage | Description                                                           |
|----------|--------------|-------------|------|----------|--------|------------|----------------|----------|----------|-----------------------------------------------------------------------|
| 4mud.1.A | 13.48        | homo-dimer  | 0.01 | HHblits  | X-ray  | 2.43Å      | 0.27           | 22 - 178 | 0.69     | Ring oxydation complex/ phenylacetic acid degradation related protein |

The template contained no ligands.

Target MPELALDPRTIGGAFSVDEECARRI INYRFAENVCMTEGGWASSTPSIKVKFALGEHCYHDSIHSFWLGQRLPELRQTEK  
 4mud.1.A -----NIIELRADFELAMVEQYSPWLVNAPTVDLSRLFVAKLVSDLELNHGWLVRLLLEEFKVKDV

Target MDYESPPTFRRTSYLAEPPEAFKFCETMQLQTDQLLRVVGLYRVLKTHLAVYYRHHIQVTDQVSDAPSVRILNHVLEE  
 4mud.1.A IERISNA--RLGIHKLEVNLPFNWEDVIAFT-----FLVDGAGLYQLKILK-----DCSFEPLSTLASSMIKEE

Target EQHLKWGQAMYEEELADTPERRRAALSWQMELEDLLVKSGGVTTGGR  
 4mud.1.A ESHIFFSQNELRNYQKN-----

| Model #03                                                                          | File | Built with    | Oligo-State                   | Ligands | GMQE | QMEAN |
|------------------------------------------------------------------------------------|------|---------------|-------------------------------|---------|------|-------|
|  | PDB  | ProMod3 2.0.0 | monomer (matching prediction) | None    | 0.35 | -4.15 |

QMEAN -4.15

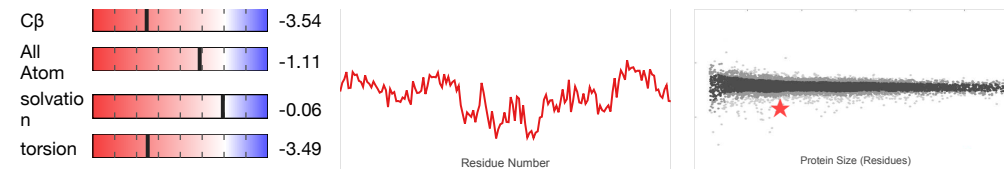

| Template | Seq Identity | Oligo-state | QSQE | Found by | Method | Resolution | Seq Similarity | Range    | Coverage | Description  |
|----------|--------------|-------------|------|----------|--------|------------|----------------|----------|----------|--------------|
| 3ogh.1.A | 11.19        | homo-dimer  | 0.05 | HHblits  | X-ray  | 1.65Å      | 0.26           | 18 - 177 | 0.70     | Protein yciE |

#### Excluded ligands

| Ligand Name.Number | Reason for Exclusion        | Description   |
|--------------------|-----------------------------|---------------|
| CL.3               | Not biologically relevant.  | CHLORIDE ION  |
| FE.2               | Binding site not conserved. | FE (III) ION  |
| FE.5               | Binding site not conserved. | FE (III) ION  |
| MG.1               | Binding site not conserved. | MAGNESIUM ION |
| MG.4               | Binding site not conserved. | MAGNESIUM ION |

Target MPELALDPRTIGGAFSVDEECARRI INYRFAENVCMTEGGWASSTPSIKVKFALGEHCYHDSIHSFWLGQRLPELRQTEK  
 3ogh.1.A -----EYHDWLRDAHAMEKQAESMLESMASRIDNYPELRARIEQHLSETKNQIVQLETILDRNDI--

Target KMDYESPPTFRRTSYLAEPPEAFKFCETMQLQ-----TDQLLRVVGLYRVLKTHLA--VYYRHHIQVTDQVSDAPSVRIL  
 3ogh.1.A -----SRS---V---IK-DSMSKMAALGQSIGGIFPSDEIVKGS--ISGYVFEQFEIACYTSLLAANKAGDTASIPTI

Target NHVLEEEQHLKWGQAMYEEELADTPERRRAALSWQMELEDLLVKSGGVTTGGR  
 3ogh.1.A EAILNEEKHMADWLIQHQPQTEK-----

| Model #02                                                                             | File | Built with    | Oligo-State                   | Ligands | GMQE | QMEAN |
|---------------------------------------------------------------------------------------|------|---------------|-------------------------------|---------|------|-------|
|  | PDB  | ProMod3 2.0.0 | monomer (matching prediction) | None    | 0.31 | -4.91 |

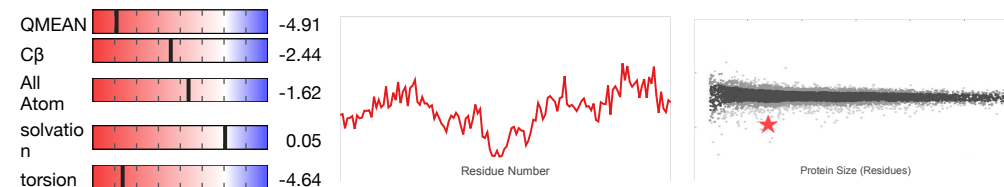

| Template | Seq Identity | Oligo-state | QSQE | Found by | Method | Resolution | Seq Similarity | Range | Coverage | Description |
|----------|--------------|-------------|------|----------|--------|------------|----------------|-------|----------|-------------|
|          |              | homo-       |      |          |        |            |                | 39 -  |          | Alr3090     |

|          |       |         |      |         |       |       |      |     |      |         |
|----------|-------|---------|------|---------|-------|-------|------|-----|------|---------|
| 4r42.1.A | 12.12 | hexamer | 0.00 | HHblits | X-ray | 1.90Å | 0.26 | 176 | 0.64 | protein |
|----------|-------|---------|------|---------|-------|-------|------|-----|------|---------|

#### Excluded ligands

| Ligand Name.Number | Reason for Exclusion        | Description           |
|--------------------|-----------------------------|-----------------------|
| CA.3               | Binding site not conserved. | CALCIUM ION           |
| CA.4               | Binding site not conserved. | CALCIUM ION           |
| CA.9               | Binding site not conserved. | CALCIUM ION           |
| CA.10              | Binding site not conserved. | CALCIUM ION           |
| CA.14              | Binding site not conserved. | CALCIUM ION           |
| CA.19              | Binding site not conserved. | CALCIUM ION           |
| CA.20              | Binding site not conserved. | CALCIUM ION           |
| CA.25              | Binding site not conserved. | CALCIUM ION           |
| CA.26              | Binding site not conserved. | CALCIUM ION           |
| CA.30              | Binding site not conserved. | CALCIUM ION           |
| MN.1               | Binding site not conserved. | MANGANESE (II) ION    |
| MN.2               | Binding site not conserved. | MANGANESE (II) ION    |
| MN.7               | Binding site not conserved. | MANGANESE (II) ION    |
| MN.8               | Binding site not conserved. | MANGANESE (II) ION    |
| MN.12              | Binding site not conserved. | MANGANESE (II) ION    |
| MN.13              | Binding site not conserved. | MANGANESE (II) ION    |
| MN.17              | Binding site not conserved. | MANGANESE (II) ION    |
| MN.18              | Binding site not conserved. | MANGANESE (II) ION    |
| MN.23              | Binding site not conserved. | MANGANESE (II) ION    |
| MN.24              | Binding site not conserved. | MANGANESE (II) ION    |
| MN.28              | Binding site not conserved. | MANGANESE (II) ION    |
| MN.29              | Binding site not conserved. | MANGANESE (II) ION    |
| P6G.16             | Not biologically relevant.  | HEXAETHYLENE GLYCOL   |
| P6G.32             | Not biologically relevant.  | HEXAETHYLENE GLYCOL   |
| PEG.11             | Not biologically relevant.  | DI(HYDROXYETHYL)ETHER |
| PEG.27             | Not biologically relevant.  | DI(HYDROXYETHYL)ETHER |
| PG4.6              | Not biologically relevant.  | TETRAETHYLENE GLYCOL  |
| PG4.22             | Not biologically relevant.  | TETRAETHYLENE GLYCOL  |
| PGE.5              | Not biologically relevant.  | TRIETHYLENE GLYCOL    |
| PGE.15             | Not biologically relevant.  | TRIETHYLENE GLYCOL    |
| PGE.21             | Not biologically relevant.  | TRIETHYLENE GLYCOL    |
| PGE.31             | Not biologically relevant.  | TRIETHYLENE GLYCOL    |

Target 4r42.1.A MPPEALDPRTIGGAFSVDECARRIINRYFAENVCMTTEGGWASSTPSIKVKFALGEHCYHDSIHSFWLGQRLPELRQTEK  
 -----QSFHVENA--GIKDLQDIAIEEFSHLEVMGKLIHAHTKNVD

Target 4r42.1.A MD-YESPPTFRTSYLAEPPEAFKFC-ETMQLQTDQLLRVVGLYRVLKTHLAVYYRHHIQVTDQVSDAPSVRILNHVL  
 QTEAYKSTLFAVRGMGPHFLDSQGNAWTASYLNEGG-D---VVRDLRANIAEAEGARQTYEELIKLSPDEGTKQTLVHLL

Target 4r42.1.A LEEEQHLKWQAMYEELADTPERRRAALSQMELEDLLVKSQGGVTGGR  
 TREISHTQMFMKALDSLK-----

| Model #06                                                                           | File | Built with    | Oligo-State                   | Ligands | GMQE | QMEAN |
|-------------------------------------------------------------------------------------|------|---------------|-------------------------------|---------|------|-------|
|  | PDB  | ProMod3 2.0.0 | monomer (matching prediction) | None    | 0.25 | -2.94 |

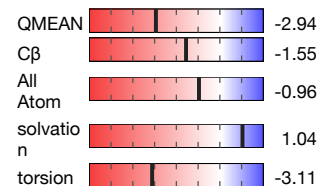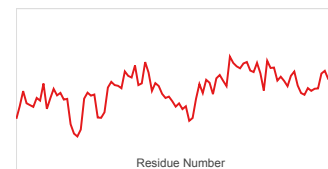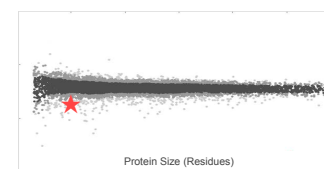

| Template | Seq Identity | Oligo-state | QSQE | Found by | Method | Resolution | Seq Similarity | Range    | Coverage | Description                                       |
|----------|--------------|-------------|------|----------|--------|------------|----------------|----------|----------|---------------------------------------------------|
| 1t0s.1.B | 12.50        | homo-dimer  | 0.04 | HHblits  | X-ray  | 2.20Å      | 0.29           | 93 - 190 | 0.47     | toluene, o-xylene monooxygenase oxygenase subunit |

#### Excluded ligands

| Ligand Name.Number | Reason for Exclusion        | Description         |
|--------------------|-----------------------------|---------------------|
| BML.5              | Binding site not conserved. | 4-BROMOPHENOL       |
| BML.6              | Binding site not conserved. | 4-BROMOPHENOL       |
| BML.7              | Binding site not conserved. | 4-BROMOPHENOL       |
| BML.8              | Binding site not conserved. | 4-BROMOPHENOL       |
| BML.9              | Binding site not conserved. | 4-BROMOPHENOL       |
| BML.10             | Binding site not conserved. | 4-BROMOPHENOL       |
| BML.15             | Binding site not conserved. | 4-BROMOPHENOL       |
| BML.16             | Binding site not conserved. | 4-BROMOPHENOL       |
| BML.17             | Binding site not conserved. | 4-BROMOPHENOL       |
| BML.18             | Binding site not conserved. | 4-BROMOPHENOL       |
| BML.19             | Binding site not conserved. | 4-BROMOPHENOL       |
| BML.20             | Binding site not conserved. | 4-BROMOPHENOL       |
| FE.1               | Binding site not conserved. | FE (III) ION        |
| FE.2               | Binding site not conserved. | FE (III) ION        |
| FE.11              | Binding site not conserved. | FE (III) ION        |
| FE.12              | Binding site not conserved. | FE (III) ION        |
| MCR.4              | Binding site not conserved. | SULFANYLACETIC ACID |
| MCR.14             | Binding site not conserved. | SULFANYLACETIC ACID |
| OH.3               | Binding site not conserved. | HYDROXIDE ION       |
| OH.13              | Binding site not conserved. | HYDROXIDE ION       |

Target 1t0s.1.B MPPEALDPRTIGGAFSVDECARRIINRYFAENVCMTTEGGWASSTPSIKVKFALGEHCYHDSIHSFWLGQRLPELRQTEK  
 -----

Target MDYESPPTFRTSYLAEPPEAFKFCETMQLQ--TDQLLRVVGLYRVLKTHLAVYYRHHIQ-VTDQVSDAPSVRILNHVL

1t0s.1.B -----WENDPAWQGFRELIEKALIAWDWGEA--FTAINLVTKPAVEEALLQQLGSLAQSEGDLLGLLAQAQK

Target LEEEQHLKWQAMYEELADTPERRRAALSWQMELEDLLVKSGGVTTGGR  
1t0s.1.B RDAERHRRWSSALVKMALEKEGNREVLQKQVAK-----

## Materials and Methods

### Template Search

Template search with BLAST and HHblits has been performed against the SWISS-MODEL template library (SMTL, last update: 2020-01-15, last included PDB release: 2020-01-10).

The target sequence was searched with BLAST against the primary amino acid sequence contained in the SMTL.

An initial HHblits profile has been built using the procedure outlined in (Remmert et al.), followed by 1 iteration of HHblits against NR20. The obtained profile has then be searched against all profiles of the SMTL. A total of 44 templates were found.

### Template Selection

For each identified template, the template's quality has been predicted from features of the target-template alignment. The templates with the highest quality have then been selected for model building.

### Model Building

Models are built based on the target-template alignment using ProMod3. Coordinates which are conserved between the target and the template are copied from the template to the model. Insertions and deletions are remodelled using a fragment library. Side chains are then rebuilt. Finally, the geometry of the resulting model is regularized by using a force field. In case loop modelling with ProMod3 fails, an alternative model is built with PROMOD-II (Guex et al.).

### Model Quality Estimation

The global and per-residue model quality has been assessed using the QMEAN scoring function (Benkert et al.). For improved performance, weights of the individual QMEAN terms have been trained specifically for SWISS-MODEL.

### Ligand Modelling

Ligands present in the template structure are transferred by homology to the model when the following criteria are met: (a) The ligands are annotated as biologically relevant in the template library, (b) the ligand is in contact with the model, (c) the ligand is not clashing with the protein, (d) the residues in contact with the ligand are conserved between the target and the template. If any of these four criteria is not satisfied, a certain ligand will not be included in the model. The model summary includes information on why and which ligand has not been included.

### Oligomeric State Conservation

The quaternary structure annotation of the template is used to model the target sequence in its oligomeric form. The method (Bertoni et al.) is based on a supervised machine learning algorithm, Support Vector Machines (SVM), which combines interface conservation, structural clustering, and other template features to provide a quaternary structure quality estimate (QSQE). The QSQE score is a number between 0 and 1, reflecting the expected accuracy of the interchain contacts for a model built based a given alignment and template. Higher numbers indicate higher reliability. This complements the GMQE score which estimates the accuracy of the tertiary structure of the resulting model.

## References

- BLAST**  
Camacho, C., Coulouris, G., Avagyan, V., Ma, N., Papadopoulos, J., Bealer, K., Madden, T.L. BLAST+: architecture

and applications. BMC Bioinformatics 10, 421-430 (2009). [doi](#)

- HHblits**  
Remmert, M., Biegert, A., Hauser, A., Söding, J. HHblits: lightning-fast iterative protein sequence searching by HMM-HMM alignment. Nat Methods 9, 173-175 (2012). [doi](#)

### Table T1:

Primary amino acid sequence for which templates were searched and models were built.

MPELALDPRITGGAFVDECCARRIINRYFAENVCMTEGGWASSTPSIKVKFALGEHCYHDSIHSFWLQRLPELRQTEKMDYESPPTFRTSYLAEPNE  
AFLKFCETMQLQTDQLLRVVGLYRVLKTHLAVYYRHHIQVTDQVSDAPSVRILNHVLEEEQHLKWQAMYEELADTPERRRAALSWQMELEDLLVKSGG  
VTGGR

### Table T2:

| Template | Seq Identity | Oligo-state  | QSQE | Found by | Method | Resolution | Seq Similarity | Coverage | Description                                                           |
|----------|--------------|--------------|------|----------|--------|------------|----------------|----------|-----------------------------------------------------------------------|
| 4ii4.1.A | 17.12        | monomer      | -    | HHblits  | X-ray  | 2.80Å      | 0.28           | 0.71     | 1,2-phenylacetyl-CoA epoxidase, subunit A                             |
| 4iit.1.A | 18.49        | monomer      | -    | HHblits  | X-ray  | 4.30Å      | 0.29           | 0.71     | Phenylacetate-CoA oxygenase subunit PaaA                              |
| 3pvt.1.A | 17.81        | monomer      | -    | HHblits  | X-ray  | 2.03Å      | 0.28           | 0.71     | Phenylacetic acid degradation protein paaA                            |
| 3pvt.1.B | 17.91        | monomer      | -    | HHblits  | X-ray  | 2.03Å      | 0.29           | 0.65     | Phenylacetic acid degradation protein paaC                            |
| 3pvt.2.A | 17.91        | monomer      | -    | HHblits  | X-ray  | 2.03Å      | 0.29           | 0.65     | Phenylacetic acid degradation protein paaC                            |
| 4iit.1.C | 20.30        | monomer      | -    | HHblits  | X-ray  | 4.30Å      | 0.29           | 0.65     | Phenylacetate-CoA oxygenase subunit PaaC                              |
| 1otk.1.A | 18.18        | homo-dimer   | -    | HHblits  | X-ray  | 2.00Å      | 0.29           | 0.64     | Phenylacetic acid degradation protein paaC                            |
| 4mud.1.A | 13.48        | homo-dimer   | 0.01 | HHblits  | X-ray  | 2.43Å      | 0.27           | 0.69     | Ring oxydation complex/ phenylacetic acid degradation related protein |
| 3ogh.1.A | 11.19        | homo-dimer   | 0.05 | HHblits  | X-ray  | 1.65Å      | 0.26           | 0.70     | Protein yciE                                                          |
| 3ogh.1.B | 11.19        | homo-dimer   | 0.03 | HHblits  | X-ray  | 1.65Å      | 0.26           | 0.70     | Protein yciE                                                          |
| 4r42.1.A | 12.12        | homo-hexamer | -    | HHblits  | X-ray  | 1.90Å      | 0.26           | 0.64     | Alr3090 protein                                                       |
| 6j42.1.A | 12.12        | homo-hexamer | -    | HHblits  | X-ray  | 2.49Å      | 0.26           | 0.64     | Alr3090 protein                                                       |
| 3ge8.1.B | 16.67        | homo-dimer   | 0.08 | HHblits  | X-ray  | 2.19Å      | 0.30           | 0.47     | Toluene-4-monoxygenase system protein E                               |
| 5tdv.1.B | 16.67        | homo-dimer   | 0.06 | HHblits  | X-ray  | 2.00Å      | 0.30           | 0.47     | Toluene-4-monoxygenase system protein E                               |
| 1t0s.1.B | 12.50        | homo-dimer   | 0.04 | HHblits  | X-ray  | 2.20Å      | 0.29           | 0.47     | toluene, o-xylene monoxygenase oxygenase subunit                      |
| 3rmk.1.B | 16.49        | monomer      | -    | HHblits  | X-ray  | 1.95Å      | 0.30           | 0.47     | Toluene-4-monoxygenase system protein E                               |
| 3q3o.1.B | 16.49        | homo-dimer   | 0.11 | HHblits  | X-ray  | 1.95Å      | 0.30           | 0.47     | Toluene-4-monoxygenase system protein E                               |
| 5tdu.1.B | 16.67        | homo-dimer   | 0.08 | HHblits  | X-ray  | 1.74Å      | 0.30           | 0.47     | Toluene-4-monoxygenase system protein E                               |
|          |              |              |      |          |        |            |                |          | toluene 4-monoxygenase hy-                                            |

|          |       |           |      |         |       |       |      |      |                                                   |
|----------|-------|-----------|------|---------|-------|-------|------|------|---------------------------------------------------|
| 3dhg.2.B | 16.67 | monomer   | -    | HHblits | X-ray | 1.85Å | 0.30 | 0.47 | droxylase beta subunit                            |
| 3dhg.1.B | 16.67 | monomer   | -    | HHblits | X-ray | 1.85Å | 0.30 | 0.47 | toluene 4-monooxygenase hydroxylase beta subunit  |
| 3dhh.1.B | 16.67 | monomer   | -    | HHblits | X-ray | 1.94Å | 0.30 | 0.47 | toluene 4-monooxygenase hydroxylase beta subunit  |
| 2inc.1.B | 12.50 | homodimer | 0.04 | HHblits | X-ray | 1.85Å | 0.29 | 0.47 | Toluene, o-xylene monooxygenase oxygenase subunit |
| 2ind.1.B | 12.50 | homodimer | -    | HHblits | X-ray | 2.20Å | 0.29 | 0.47 | Toluene, o-xylene monooxygenase oxygenase subunit |
| 1cnt.2.B | 14.46 | homodimer | -    | HHblits | X-ray | 2.40Å | 0.25 | 0.40 | CILIARY NEUROTROPHIC FACTOR                       |
| 1cnt.1.A | 14.46 | homodimer | -    | HHblits | X-ray | 2.40Å | 0.25 | 0.40 | CILIARY NEUROTROPHIC FACTOR                       |
| 1cnt.1.B | 14.46 | homodimer | -    | HHblits | X-ray | 2.40Å | 0.25 | 0.40 | CILIARY NEUROTROPHIC FACTOR                       |
| 1cnt.2.A | 14.46 | homodimer | -    | HHblits | X-ray | 2.40Å | 0.25 | 0.40 | CILIARY NEUROTROPHIC FACTOR                       |
| 1u7m.1.A | 15.38 | homodimer | 0.01 | HHblits | NMR   | NA    | 0.31 | 0.19 | Four-helix bundle model                           |
| 1u7m.1.B | 15.38 | homodimer | 0.01 | HHblits | NMR   | NA    | 0.31 | 0.19 | Four-helix bundle model                           |
| 5vju.1.A | 15.00 | monomer   | -    | HHblits | X-ray | 2.08Å | 0.30 | 0.20 | Reaction Center Maquette Leu71His variant         |
| 1mft.1.A | 15.38 | homodimer | 0.11 | HHblits | X-ray | 2.50Å | 0.31 | 0.19 | Four-helix bundle model                           |
| 1mft.1.B | 15.38 | homodimer | 0.11 | HHblits | X-ray | 2.50Å | 0.31 | 0.19 | Four-helix bundle model                           |
| 5c39.1.A | 15.79 | homodimer | 0.12 | HHblits | X-ray | 1.75Å | 0.31 | 0.19 | P0 Manganese cluster peptide                      |
| 5c39.1.B | 15.79 | homodimer | 0.12 | HHblits | X-ray | 1.75Å | 0.31 | 0.19 | P0 Manganese cluster peptide                      |
| 5vjs.1.A | 15.00 | monomer   | -    | HHblits | X-ray | 2.00Å | 0.29 | 0.20 | Reaction Center Maquette                          |
| 5vjt.1.A | 15.00 | monomer   | -    | HHblits | X-ray | 1.45Å | 0.29 | 0.20 | Reaction Center Maquette                          |
| 2ffd.1.A | 13.16 | monomer   | -    | HHblits | NMR   | NA    | 0.32 | 0.19 | Diiron protein                                    |
| 2fff.1.A | 13.16 | monomer   | -    | HHblits | NMR   | NA    | 0.32 | 0.19 | Diiron protein                                    |
| 1umq.1.A | 17.74 | monomer   | -    | HHblits | NMR   | NA    | 0.28 | 0.30 | PHOTOSYNTHETIC APPARATUS REGULATORY PROTEIN       |

The table above shows the top 39 filtered templates. A further 4 templates were found which were considered to be less suitable for modelling than the filtered list.

3ri7.1.B, 5grq.1.C, 5tds.1.B, 5grq.1.D



# I-TASSER results for job id S520517

(Click on [SS2017\\_results.tar.gz](#) to download the tarball file including all modeling results listed on this page. Click on [Annotation of I-TASSER Output](#) to read the instructions for how to interpret the results on this page. Model results are kept on the server for 60 days, there is no way to retrieve the modeling data older than 2 months)

## Submitted Sequence in FASTA format

```
>Seqs_573936_m0X
HSTFAEQRVTLVSRSDPAVRPMFIDEAEKKALEKLDGASNYDGLGLREMAQDPQNY
EPRKALVSVIAEYAGIDAFSRVCKEQWTPVPEMLIMMARTQDEVRHAQLGTELLKSYGVEGYPTDLAGSPNQATAVAQQGADVRDPVLSVNTVWLEGAALDFKGTSLGRVNDLRLHYVDYMADEVHTAITDGVKVKLGDGPAEAEARLRAHAMFEGRELRISQQSAIEFRFAEIEERGTAAALAG
SYGVEEYPTDLAGSPNQATAVAQQGADVRDPVLSVNTVWLEGAALDFKGTSLGRVNDLRLHYVDYMADEVHTAITDGVKVKLGDGPAEAEARLRAHAMFEGRELRISQQSAIEFRFAEIEERGTAAALAG
DLGRVNDLRLHYVDYMADEVHTAITDGVKVKLGDGPAEAEARLRAHAMFEGRELRISQQSAIEFRFAEIEERGTAAALAG
LSGQSAIEFRFAEIEERGTAAALAG
```

## Predicted Secondary Structure

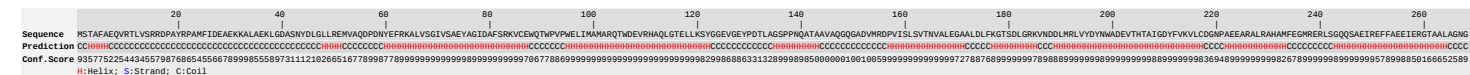

## Predicted Solvent Accessibility

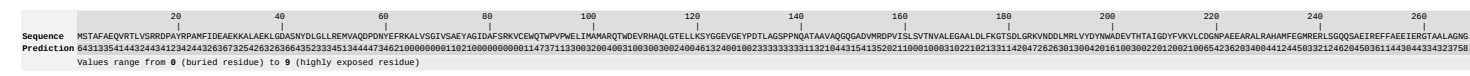

## Predicted normalized B-factor

(B-factor is a value to indicate the extent of the inherent thermal mobility of residues/atoms in proteins. In I-TASSER, this value is deduced from threading template proteins from the PDB in combination with the sequence profiles derived from sequence databases. The reported B-factor profile in the figure below corresponds to the normalized B-factor of the target protein, defined by  $B = (B_i - \bar{B}) / s$ , where  $B_i$  is the raw B-factor value, and  $\bar{B}$  and  $s$  are respectively the mean and standard deviation of the raw B-factors along the sequence. [Click here to read more about empirical normalized B-factors](#))

## Top 10 threading templates used by I-TASSER

(I-TASSER modeling starts from the structure templates identified by LOMETS from the PDB library. LOMETS is a meta-server threading approach containing multiple threading programs, where each threading program can generate tens of thousands of template alignments. I-TASSER only uses the templates of the highest significance in the threading alignments, the significance of which are measured by the Z-score, i.e. the difference between the raw and average scores in the set of standard deviation. The templates in this section are the 10 best templates selected from the LOMETS threading programs. Usually, one template of the highest Z-score is selected from each threading program, where the threading programs are sorted by the average performance in the large-scale benchmark test experiments.)

| Rank | PDB Hit | Ident1 | Ident2 | Cov  | Norm. Z-score | Download |
|------|---------|--------|--------|------|---------------|----------|
| 1    | 1a29A   | 0.15   | 0.20   | 0.97 | 0.95          | Download |
| 2    | 1a29A   | 0.15   | 0.20   | 0.77 | 1.76          | Download |
| 3    | 1a29A   | 0.12   | 0.20   | 0.96 | 0.95          | Download |
| 4    | 1a29A   | 0.14   | 0.19   | 0.84 | 1.96          | Download |
| 5    | 1a29A   | 0.11   | 0.22   | 0.87 | 1.14          | Download |
| 6    | 1a29A   | 0.14   | 0.20   | 0.87 | 1.25          | Download |
| 7    | 1a29A   | 0.18   | 0.21   | 0.95 | 1.73          | Download |
| 8    | 1a29A   | 0.14   | 0.20   | 0.89 | 1.21          | Download |
| 9    | 1a29A   | 0.13   | 0.20   | 0.91 | 0.90          | Download |
| 10   | 1a29A   | 0.12   | 0.22   | 0.93 | 1.26          | Download |

(a) All the residues are colored in black; however, those residues in template which are not polar residues are colored in dark shade. [\(View about the colors usage\)](#)

(b) Rank of templates represents the top ten threading templates used by I-TASSER.

(c) Ident1 is the percentage sequence identity of the templates in the threading aligned region with the query sequence.

(d) Ident2 is the percentage sequence identity of the whole template chains with query sequence.

(e) Cov represents the coverage of the threading alignment is equal to the number of aligned residues divided by the length of query protein.

(f) Norm. Z-score is the normalized Z-score of the threading alignments. Alignment with a Normalized Z-score > 1 means a good alignment and vice versa.

(g) Download Align provides the 3D structure of aligned regions of the threading templates.

(h) The top 10 aligned regions above (in order of their ranking) are as follows:

- 1: MUSTER 2: FPAS-3D 3: SPARKS-X 4: HNSEARCH 5: HNSEARCH 6: Neff-FPAS 7: HNSEARCH 8: pGentHeader 9: wPPAS 10: PROSPECT2

## Top 5 final models predicted by I-TASSER

(For each target, I-TASSER simulations generate a large ensemble of structural conformations, called decoys. To select the final models, I-TASSER uses the SPICKER program to cluster all the decoys based on the pair-wise structure similarity, and reports up to five models which corresponds to the five largest structure clusters. The confidence of each model is quantitatively measured by C-score that is calculated based on the significance of threading template alignments and the convergence parameters of the structure assembly simulation. C-score is typically in the range of [-5, 2], where a C-score of a higher value signifies a model with a higher confidence and vice versa. TM-score and RMSD are estimated based on C-score and protein length following the correlation observed between these qualities. Since the top 5 models are ranked by the cluster size, it is possible that the low-rank models have a higher C-score than the top 5 models. Although the first model has a better quality in most cases, it is also possible that the lower-rank models have a better quality than the higher-rank models as seen in our benchmark sets. If the I-TASSER simulations coverage, it is possible to have less than 5 clusters generated; this is usually an indication that the models have a good quality because of the converged simulations.)

- More about C-score
- Local structure accuracy profile of the top five models

(By right-click on the images, you can open image file or change the configurations, e.g. modifying the background color or stopping the spin of your models)

- Download Model 1
- C-score = -1.24 (Read more about C-score)
- Download Model 2
- C-score = -1.85
- Download Model 3
- C-score = -3.50
- Download Model 4
- C-score = -4.17
- Download Model 5
- C-score = -4.55

## Proteins structurally close to the target in the PDB (as identified by TM-align)

(After the structure assembly simulation, I-TASSER uses the TM-align structural alignment program to match the first I-TASSER model to all structures in the PDB library. This section reports the top 10 proteins from the PDB that have the closest structural similarity, i.e. the highest TM-score, to the predicted I-TASSER model. Due to the structural similarity, these proteins often have similar function to the target. However, users are encouraged to use the data in the next section (Predicted function using COFACTOR) to infer the function of the target protein, since COACH has been extensively trained to derive biological functions from multi-source of sequence and structure features which has on average a higher accuracy than the function annotations derived only from the global structure comparison.)

## Top 10 Identified structural analogs in PDB

| Click to view | Rank | PDB Hit | TM-score | RMSD <sup>a</sup> | IDEN <sup>b</sup> | Cov   | Alignment |
|---------------|------|---------|----------|-------------------|-------------------|-------|-----------|
|               | 1    | 1a29A   | 0.890    | 1.98              | 0.139             | 0.966 | Download  |
|               | 2    | 1a29A   | 0.766    | 3.16              | 0.119             | 0.966 | Download  |
|               | 3    | 3he4A   | 0.763    | 3.10              | 0.109             | 0.907 | Download  |
|               | 4    | 1imj9B  | 0.757    | 2.96              | 0.110             | 0.899 | Download  |
|               | 5    | 1imj9A  | 0.756    | 2.95              | 0.083             | 0.892 | Download  |
|               | 6    | 1l02D   | 0.754    | 3.02              | 0.102             | 0.899 | Download  |
|               | 7    | 1imj9A  | 0.750    | 3.01              | 0.084             | 0.892 | Download  |
|               | 8    | 1a29A   | 0.748    | 3.06              | 0.106             | 0.895 | Download  |
|               | 9    | 1a29A   | 0.746    | 3.05              | 0.059             | 0.892 | Download  |
|               | 10   | 1imj9B  | 0.743    | 2.85              | 0.095             | 0.899 | Download  |

- (a) Query structure is shown in cartoon, while the structural analog is displayed using backbone trace.
- (b) Ranking of proteins is based on TM-score of the structural alignment between the query structure and known structures in the PDB library.
- (c) RMSD<sup>a</sup> is the RMSD between residues that are structurally aligned by TM-align.
- (d) IDEN<sup>b</sup> is the percentage sequence identity in the structurally aligned region.
- (e) Cov represents the coverage of the alignment by TM-align and is equal to the number of structurally aligned residues divided by length of the query protein.

## Predicted function using COFACTOR and COACH

(This section reports biological annotations of the target protein by COFACTOR and COACH based on the I-TASSER structure prediction. While COFACTOR deduces protein functions (ligand-binding sites, EC and GO) using structure comparison and protein-protein networks, COACH is a meta-server approach that combines multiple function annotation results (on ligand-binding sites) from the COFACTOR, TM-SITE and S-SITE programs.)

## Ligand binding sites

| Click to view | Rank | C-score | PDB Hit | Cluster size | Lig Name | Complex   | Ligand Binding Site Residues                            |
|---------------|------|---------|---------|--------------|----------|-----------|---------------------------------------------------------|
|               | 1    | 0.35    | 208     | 1a29A        | FE2      | Res. Mol. | 104,108,169,202,205                                     |
|               | 2    | 0.31    | 163     | 1a29A        | FE2      | Res. Mol. | 74,104,169,202                                          |
|               | 3    | 0.07    | 38      | 1a29A        | FE2      | Res. Mol. | 73,74,77,108,164,168,169,172,172,175,176,236,242,245    |
|               | 4    | 0.03    | 19      | 1a29A        | Y62      | Res. Mol. | 69,73,74,77,108,164,168,169,171,172,175,176,236,242,245 |
|               | 5    | 0.02    | 11      | 1a29A        | FE2      | Res. Mol. | 66,70,73,74,108,169,173,176,198,202                     |

- Download the residue-specific ligand binding probability, which is estimated by SVM.
- Download the all possible binding ligands and detailed prediction summary.
- Download the templates clustering results.
- (a) C-score is the confidence score of the prediction. C-score ranges [0-1], where a higher score indicates a more reliable prediction.
- (b) Cluster size is the total number of templates in a cluster.
- (c) Lig Name is name of possible binding ligand. Click the name to view its information in [the Bio.P. database](#).
- (d) Res is a single complex structure with the most representative ligand in the cluster, i.e., the one listed in the Lig Name column.
- (e) Mol is the complex structures with all potential binding ligands in the cluster.

## Enzyme Commission (EC) numbers and active sites

| Click Rank | Rank | Cscore <sup>(a)</sup> | PDB Hit | TM-score | RMSD <sup>(b)</sup> | IDEN <sup>(c)</sup> | Cov   | EC Number | Active Site Residues |
|------------|------|-----------------------|---------|----------|---------------------|---------------------|-------|-----------|----------------------|
|            | 1    | 0.284                 | 1a29A   | 0.752    | 3.05                | 0.102               | 0.899 | 1.4.13.26 | 31,75,112            |
|            | 2    | 0.279                 | 1imj9B  | 0.757    | 2.96                | 0.110               | 0.899 | 1.4.13.26 | 75,112               |
|            | 3    | 0.261                 | 1a29A   | 0.720    | 3.44                | 0.122               | 0.895 | 1.4.13.26 | NA                   |
|            | 4    | 0.250                 | 1imj9A  | 0.720    | 3.44                | 0.124               | 0.895 | 1.4.13.26 | NA                   |
|            | 5    | 0.248                 | 1a29A   | 0.763    | 3.10                | 0.109               | 0.907 | 1.4.13.1  | NA                   |

- Click on the radio buttons to visualize predicted active site residues.
- (a) Cscore<sup>(a)</sup> is the confidence score for the EC number prediction. Cscore<sup>(a)</sup> values range between [0-1], where a higher score indicates a more reliable EC number prediction.
- (b) TM-score is a measure of global structural similarity between query and template protein.
- (c) RMSD<sup>(b)</sup> is the RMSD between residues that are structurally aligned by TM-align.
- (d) IDEN<sup>(c)</sup> is the percentage sequence identity in the structurally aligned region.
- (e) Cov represents the coverage of global structural alignment and is equal to the number of structurally aligned residues divided by length of the query protein.

## Gene Ontology (GO) terms

| Rank | Cscore <sup>(a)</sup> | TM-score | RMSD <sup>(b)</sup> | IDEN <sup>(c)</sup> | Cov  | PDB Hit | Associated GO Terms                                                                                                                            |
|------|-----------------------|----------|---------------------|---------------------|------|---------|------------------------------------------------------------------------------------------------------------------------------------------------|
| 1    | 0.37                  | 0.7191   | 3.11                | 0.09                | 0.87 | 1a29A   | GO:0001686 GO:0005514 GO:0005129 GO:0046934 GO:0005259 GO:0009282 GO:0046972 GO:0005114 GO:0004748 GO:0005737 GO:0016491 GO:0005269 GO:0005283 |
| 2    | 0.36                  | 0.7523   | 3.05                | 0.10                | 0.90 | 1imj9C  | GO:0005114 GO:0004739 GO:0005096 GO:0004676 GO:0004679 GO:0004497 GO:0016491 GO:0004694                                                        |
| 3    | 0.33                  | 0.7371   | 2.94                | 0.08                | 0.87 | 1a29A   | GO:0004260 GO:0005114 GO:0046934 GO:0004748 GO:0004938 GO:0004691 GO:0004694 GO:0004672                                                        |
| 4    | 0.29                  | 0.7203   | 3.44                | 0.07                | 0.86 | 1imj9B  | GO:0001686 GO:0005269 GO:0005114 GO:0005259 GO:0005114 GO:0004748 GO:0005096 GO:0004938 GO:0004938 GO:0004934                                  |
| 5    | 0.26                  | 0.7330   | 3.10                | 0.11                | 0.91 | 1a29A   | GO:0046972 GO:0005269 GO:0004938 GO:0005114 GO:0004748 GO:0005096 GO:0004938 GO:0004938 GO:0042903 GO:0046934                                  |
| 6    | 0.25                  | 0.7360   | 3.00                | 0.07                | 0.88 | 1a29A   | GO:0001686 GO:0004691 GO:0004697 GO:0005114 GO:0004748 GO:0046934                                                                              |
| 7    | 0.25                  | 0.7283   | 3.13                | 0.08                | 0.88 | 1a29A   | GO:0001686 GO:0005269 GO:0004697 GO:0004691 GO:0004748 GO:0046934                                                                              |
| 8    | 0.24                  | 0.7568   | 2.96                | 0.11                | 0.90 | 1a29A   | GO:0016491 GO:0004697 GO:0004739 GO:0005114 GO:0004938 GO:0004697 GO:0004694                                                                   |
| 9    | 0.24                  | 0.7402   | 3.09                | 0.10                | 0.87 | 1imj9B  | GO:0004748 GO:0005269 GO:0005114 GO:0005259 GO:0005114 GO:0016491 GO:0004697 GO:0004938 GO:0046934                                             |
| 10   | 0.23                  | 0.7368   | 3.11                | 0.10                | 0.87 | 1a29A   | GO:0046934 GO:0005114 GO:0004739 GO:0004697 GO:0016491 GO:0004697                                                                              |

| Consensus prediction of GO terms |            |            |            |            |            |
|----------------------------------|------------|------------|------------|------------|------------|
| Molecular Function               | GO:0004748 | GO:0016491 | GO:0042903 | GO:0003145 |            |
| GO-Score                         | 0.69       | 0.54       | 0.51       | 0.50       |            |
| Biological Process               | GO:0005114 | GO:0005260 | GO:0004739 | GO:0009283 | GO:0016491 |
| GO-Score                         | 0.86       | 0.69       | 0.58       | 0.54       | 0.54       |
| Cellular Component               | GO:0016491 |            |            |            |            |
| GO-Score                         | 0.51       |            |            |            |            |

(a) Cscore<sup>(a)</sup> is a combined measure for evaluating global and local similarity between query and template protein. It's range is [0-1] and higher values indicate more confident predictions.

(b) TM-score is a measure of global structural similarity between query and template protein.

(c) RMSD<sup>(b)</sup> is the RMSD between residues that are structurally aligned by TM-align.

(d) IDEN<sup>(c)</sup> is the percentage sequence identity in the structurally aligned region.

(e) Cov represents the coverage of global structural alignment and is equal to the number of structurally aligned residues divided by length of the query protein.

(f) The second table shows a consensus GO terms amongst the top scoring templates. The GO-Score associated with each prediction is defined as the average weight of the GO term, where the weights are assigned based on Cscore<sup>(a)</sup> of the template.

(Click on [SS2017\\_results.tar.gz](#) to download the tarball file including all modeling results listed on this page)
